# Supplementary material for: Comparative Transcriptomics Unveil the Crucial Genes Involved in Coumarin Biosynthesis in Peucedanum praeruptorum Dunn
Source: Front Plant Sci. 2022 May 17;13:899819. doi: 10.3389/fpls.2022.899819 (PMC9152428; doi:10.3389/fpls.2022.899819)
Supplement: Supplementary file 5 [file Table_1.XLSX]

## Sheet: Sheet1
1. List of materials and reagents
Reagent	Supplier	Serial number
UNlQ-10 Column Trizol Total RNA Extraction Kit	Sangon Biotech	B511321
agarose	BBI	A600014
4S Red Plus Nucleic Acid Stain (10,000 X in water)	BBI	A606695
GeneRuler DNA Ladder Mix	Thermo Scientific	B300721
Maxima Reverse Transcriptase	Thermo Scientific	EP0743
2. cDNA synthesis reaction system
Component	Volume (μL)
total RNA	3
Random Primer p(dN)6（100 pmol）	1
dNTP Mix（0.5 mM final concentration）	1
5X RT Buffer	4
Thermo Scientific RiboLock RNase Inhibitor (20 U)	0.5
Maxima Reverse Transcriptase (200 U)	1
Rnase-free ddH2O	4
3. cDNA synthesis reaction program
Component	Volume (μL)
5X RT Buffer	4
Thermo Scientific RiboLock RNase Inhibitor (20 U)	0.5
Maxima Reverse Transcriptase (200 U)	1
4. The qPCR reaction MIX
Reaction Component	Concentration	Volume(µl)
SybrGreen qPCR Master Mix	2X	10
Primer F (10 µM)	10 µM	0.4
Primer R (10 µM)	10 µM	0.4
ddH20		7.2
Template (cDNA)		2
Total		20
5. The qPCR cycling conditions
Thermal Cycler	Times and Temperatures	Dissociation
	Initial Steps	Each of 45 cycles
		Melt	Anneal/Extend
ABI Stepone plus	HOLD	CYCLE
	3 min 95°C	5 s 95°C	30 s 60°C
6. Eighteen primers for differentially expressed genes
Gene	Unigene ID	Forward primer	Reverse primer
Reference gene	DN87090_c0_g1	GGTCATGGGAGATGACATGGTC	CAGGGTTTGTCTCGCAAAAATC
BMT	DN88823_c0_g1	TATGTTCAGTGTAGCAGGTTCGTAA	ATGTAGTTGATGCCCATCTAAAGGA
BMT	DN86462_c1_g1	TCAGGCAATCTTCATCACTCCAA	TGTCCAGTCACCCATTTCAATATCT
SGT	DN70591_c3_g1	TGCCACCACCGACATCAA	AGCCAAGATCCTCAATTCAACAAG
PAL	DN75931_c1_g5	CCTCCAACTCACCAACTCTTATACC	CAATAACCTCACCGTCTGATGTAGT
AS	DN72866_c0_g2	GCTTAGAGTTGTTGACCGAGAGTA	GCCATTCTTCAGTGCGTGTT
C4H	DN95494_c1_g1	TCACATCTTGCCTTGCTACTCTA	TGGAACTGAAACAACATCTACAACT
C4H	DN95494_c1_g2	CAGCAGAGAAAGGAGGACAGT	ATGACAGATAGTGGAGCGAACAA
C3H	DN76812_c3_g1	GAAGGTCGTGTTGAGATTGATTGT	AAGTCGTCGGAGTTCTGAAGAG
4CL	DN79314_c3_g1	TGCGTTAGTCCACACCACAT	CGAGATTGTCCGAGAAGTCCTT
4CL	DN91057_c0_g1	CAAGCCAAACTACCTGAATAACCAT	TTGTCCTCGTTGAAGCAGATTG
HCT	DN97786_c1_g1	TTAGGCTGCGGAACTTGAGT	TCACACCTCTCCACAACAACTT
CAOMT	DN67983_c0_g1	GGTAAGGAAGTGGATCGGAGAG	TCGTGTATCAGGATAATGAGTGGAA
CCoAOMT	DN71151_c0_g1	TACCGAGATTGAAGTTGTGTCCAT	ACGCCTCACGAAGCAGAT
PRX	DN77989_c3_g2	CACCAGGACCACCACCAA	CAAGCAATGTATAACCACACCACTA
PRX	DN88245_c0_g2	CGTAGCCGATTAGTCCTCCAA	TTGCCTGTTCTTGACCAAATGATT
PRX	DN92248_c0_g1	AGCATCAATGGAGGTCAGGAA	GAAACCGAACCAACATCTACGATT
PS	DN93468_c0_g1	ATGATTGCTTTGTGACGGGATG	ATGCGGCTTCTACATTCTTCTTG
PS	DN68475_c0_g1	GGAAGAAGAGGCGGAGAGT	AAGCACCACTTACTACCAACAC
