# Supplementary material for: Comparative Transcriptomics Unveil the Crucial Genes Involved in Coumarin Biosynthesis in Peucedanum praeruptorum Dunn
Source: Front Plant Sci. 2022 May 17;13:899819. doi: 10.3389/fpls.2022.899819 (PMC9152428; doi:10.3389/fpls.2022.899819)
Supplement: Supplementary file 6 [file Table_2.XLSX]

## Sheet: Sheet1
Gene id	MeanTPM (C)	MeanTPM (D)	log2FoldChange	pValue	qValue	result
TRINITY_DN93361_c1_g1	112.147	0.0001	20.097	4.06654e-17	1.86948e-13	up
TRINITY_DN91042_c0_g1	31.6438	0.0001	18.2716	2.94404e-32	2.57153e-27	up
TRINITY_DN93417_c1_g2	26.6298	0.0001	18.0227	3.03482e-05	0.00484627	up
TRINITY_DN70321_c0_g4	24.7683	0.0001	17.9181	2.09234e-17	1.07506e-13	up
TRINITY_DN56435_c0_g1	17.5567	0.0001	17.4217	2.4351e-31	1.06349e-26	up
TRINITY_DN93041_c1_g1	14.2348	0.0001	17.1191	2.02867e-17	1.07506e-13	up
TRINITY_DN90489_c0_g1	11.8904	0.0001	16.8594	1.1533e-06	0.000428669	up
TRINITY_DN93041_c0_g1	10.251	0.0001	16.6454	1.9365e-16	4.83279e-13	up
TRINITY_DN77520_c1_g1	7.61608	0.0001	16.2168	2.76728e-05	0.00451802	up
TRINITY_DN88729_c1_g1	7.4073	0.0001	16.1767	0.000186037	0.017808	up
TRINITY_DN95396_c0_g5	7.18005	0.0001	16.1317	2.59934e-16	5.85049e-13	up
TRINITY_DN86264_c1_g2	6.67768	0.0001	16.0271	7.70298e-17	2.9926e-13	up
TRINITY_DN74895_c0_g5	6.43802	0.0001	15.9743	3.51119e-07	0.00017017	up
TRINITY_DN78669_c1_g5	6.02118	0.0001	15.8778	0.000382926	0.0289088	up
TRINITY_DN80887_c0_g1	5.91394	0.0001	15.8518	3.7287e-17	1.8094e-13	up
TRINITY_DN88015_c0_g4	5.90462	0.0001	15.8496	6.11969e-06	0.00147255	up
TRINITY_DN77154_c1_g3	5.89075	0.0001	15.8462	2.60893e-23	4.60702e-19	up
TRINITY_DN81596_c0_g2	5.86886	0.0001	15.8408	5.61351e-21	4.93028e-17	up
TRINITY_DN71591_c0_g5	5.40182	0.0001	15.7212	1.57403e-16	4.16626e-13	up
TRINITY_DN91782_c0_g3	5.18945	0.0001	15.6633	1.17141e-16	4.09277e-13	up
TRINITY_DN81720_c1_g1	4.72247	0.0001	15.5273	0.000781163	0.045157	up
TRINITY_DN85320_c1_g1	4.6984	0.0001	15.5199	2.06066e-07	0.000110425	up
TRINITY_DN77429_c3_g7	4.56315	0.0001	15.4777	0.000448908	0.0321363	up
TRINITY_DN74207_c1_g1	4.06148	0.0001	15.3097	2.6372e-23	4.60702e-19	up
TRINITY_DN82378_c2_g5	3.99819	0.0001	15.2871	2.06487e-05	0.0036363	up
TRINITY_DN86046_c3_g1	3.88201	0.0001	15.2445	3.81403e-16	8.3286e-13	up
TRINITY_DN84233_c0_g5	3.44412	0.0001	15.0718	0.000344848	0.026901	up
TRINITY_DN75556_c1_g2	3.06811	0.0001	14.9051	0.000314105	0.0249944	up
TRINITY_DN87101_c1_g1	3.06572	0.0001	14.9039	0.000665762	0.0410101	up
TRINITY_DN90177_c3_g2	2.98094	0.0001	14.8635	7.88004e-17	2.9926e-13	up
TRINITY_DN85796_c1_g6	2.8834	0.0001	14.8155	3.55339e-06	0.000970262	up
TRINITY_DN89082_c1_g6	2.88222	0.0001	14.8149	0.000327698	0.0258802	up
TRINITY_DN72879_c3_g1	2.8762	0.0001	14.8119	1.75914e-16	4.51928e-13	up
TRINITY_DN85300_c0_g1	2.64021	0.0001	14.6884	1.31038e-16	4.13572e-13	up
TRINITY_DN83226_c0_g5	2.50666	0.0001	14.6135	1.48112e-16	4.16626e-13	up
TRINITY_DN81439_c3_g2	2.43596	0.0001	14.5722	0.000454078	0.032253	up
TRINITY_DN68896_c1_g3	2.33801	0.0001	14.513	0.000332988	0.0261796	up
TRINITY_DN87136_c1_g1	2.32285	0.0001	14.5036	5.90181e-16	1.25733e-12	up
TRINITY_DN76075_c0_g2	2.3195	0.0001	14.5015	4.65669e-17	2.03374e-13	up
TRINITY_DN88076_c3_g3	2.27586	0.0001	14.4741	1.40111e-16	4.13572e-13	up
TRINITY_DN90371_c1_g4	2.27279	0.0001	14.4722	2.27231e-16	5.3643e-13	up
TRINITY_DN75297_c2_g8	2.23691	0.0001	14.4492	0.000282084	0.0236234	up
TRINITY_DN75094_c3_g10	2.19249	0.0001	14.4203	2.61221e-16	5.85049e-13	up
TRINITY_DN86617_c3_g7	2.07747	0.0001	14.3425	1.13878e-15	2.16237e-12	up
TRINITY_DN78980_c3_g1	2.04555	0.0001	14.3202	0.000344969	0.026901	up
TRINITY_DN77721_c5_g8	1.96814	0.0001	14.2645	1.55569e-16	4.16626e-13	up
TRINITY_DN92817_c1_g1	1.85876	0.0001	14.1821	0.000208098	0.0194196	up
TRINITY_DN71947_c0_g5	1.77409	0.0001	14.1148	6.74779e-16	1.40333e-12	up
TRINITY_DN97549_c0_g5	1.74567	0.0001	14.0915	3.88049e-07	0.000185218	up
TRINITY_DN92917_c1_g1	1.70721	0.0001	14.0594	0.000750663	0.0440942	up
TRINITY_DN77430_c3_g1	1.68775	0.0001	14.0428	1.42044e-16	4.13572e-13	up
TRINITY_DN84408_c1_g3	1.60274	0.0001	13.9682	7.07145e-17	2.94129e-13	up
TRINITY_DN63234_c0_g1	1.43181	0.0001	13.8056	1.41965e-16	4.13572e-13	up
TRINITY_DN75484_c0_g1	1.2783	0.0001	13.6419	0.000214138	0.0197511	up
TRINITY_DN84500_c0_g8	1.15406	0.0001	13.4944	1.01008e-16	3.67616e-13	up
TRINITY_DN81600_c0_g2	1.01552	0.0001	13.3099	1.2121e-13	1.39307e-10	up
TRINITY_DN71870_c2_g2	1.01483	0.0001	13.309	0.000546469	0.0359973	up
TRINITY_DN83920_c0_g3	53.4815	0.0052769	13.3071	2.31204e-07	0.000120928	up
TRINITY_DN83871_c0_g7	0.882523	0.0001	13.1074	0.000135441	0.0140005	up
TRINITY_DN75915_c1_g1	207.275	0.0273887	12.8857	7.14199e-06	0.00167511	up
TRINITY_DN92391_c0_g10	0.668381	0.0001	12.7065	0.000824778	0.0468152	up
TRINITY_DN95028_c2_g1	0.589809	0.0001	12.526	2.2285e-16	5.3643e-13	up
TRINITY_DN71810_c2_g3	0.569201	0.0001	12.4747	0.000592222	0.0379244	up
TRINITY_DN92444_c0_g1	13.1094	0.00239715	12.417	1.76515e-09	1.71311e-06	up
TRINITY_DN87903_c0_g1	0.524829	0.0001	12.3576	4.86737e-05	0.00686834	up
TRINITY_DN69834_c0_g1	0.505643	0.0001	12.3039	0.000254117	0.0221079	up
TRINITY_DN91743_c2_g2	0.452202	0.0001	12.1428	0.00042921	0.0313464	up
TRINITY_DN72028_c0_g4	0.360367	0.0001	11.8152	0.000565163	0.0368948	up
TRINITY_DN96109_c1_g2	0.33612	0.0001	11.7148	1.40012e-16	4.13572e-13	up
TRINITY_DN82686_c0_g4	1143.27	0.411336	11.4406	9.23805e-12	1.00865e-08	up
TRINITY_DN81388_c4_g5	0.134338	0.0001	10.3917	6.59553e-05	0.00841022	up
TRINITY_DN81956_c4_g2	101.435	0.0836016	10.2447	1.16115e-07	7.12523e-05	up
TRINITY_DN81956_c4_g1	186.526	0.208313	9.80641	9.48411e-06	0.00204545	up
TRINITY_DN78556_c0_g6	5.11324	0.0076378	9.38686	7.42005e-06	0.0017146	up
TRINITY_DN72409_c0_g1	5.51443	0.00857568	9.32874	0.000104223	0.0117279	up
TRINITY_DN74763_c0_g3	16.1599	0.0291388	9.11526	5.19444e-06	0.00129892	up
TRINITY_DN71283_c1_g1	4.09324	0.0074592	9.10001	8.66953e-06	0.00190745	up
TRINITY_DN95550_c2_g3	21.2337	0.0434914	8.93141	1.02585e-08	8.45328e-06	up
TRINITY_DN95092_c0_g1	2.29894	0.00520762	8.78613	8.51445e-06	0.00189619	up
TRINITY_DN94426_c0_g3	9.68814	0.0220832	8.77713	5.49077e-05	0.00746082	up
TRINITY_DN78304_c0_g4	2.1361	0.0049423	8.75558	0.000119444	0.0129764	up
TRINITY_DN79781_c1_g1	29.1673	0.069877	8.70532	3.54781e-07	0.00017027	up
TRINITY_DN88982_c0_g2	7.8294	0.0202522	8.59468	1.18428e-06	0.000429848	up
TRINITY_DN92098_c0_g5	37.6165	0.0984687	8.57748	1.13739e-06	0.000424561	up
TRINITY_DN77935_c0_g4	163.428	0.430573	8.56818	1.60926e-05	0.00300366	up
TRINITY_DN68671_c0_g1	16.7468	0.0603573	8.11615	2.23497e-09	2.12193e-06	up
TRINITY_DN87398_c1_g5	2.20465	0.00813813	8.08164	1.4565e-05	0.00278993	up
TRINITY_DN71752_c0_g2	1.3881	0.00540647	8.00421	2.70068e-09	2.48312e-06	up
TRINITY_DN77935_c0_g1	869.583	3.43908	7.98216	1.17697e-06	0.000429848	up
TRINITY_DN87362_c4_g1	3.52475	0.0153518	7.84297	7.76634e-05	0.00946118	up
TRINITY_DN74763_c0_g1	29.3212	0.134351	7.76979	1.33175e-07	7.80699e-05	up
TRINITY_DN79951_c1_g1	1.65257	0.00785467	7.71695	0.000297026	0.0243656	up
TRINITY_DN77277_c0_g1	3.87747	0.018495	7.71183	0.000135016	0.0139731	up
TRINITY_DN58391_c0_g1	9.75807	0.0512951	7.57163	0.000451432	0.0321363	up
TRINITY_DN83542_c4_g2	0.712775	0.0038242	7.54214	2.75893e-05	0.00451281	up
TRINITY_DN97484_c0_g1	1.87792	0.0102884	7.51197	8.93434e-05	0.0105105	up
TRINITY_DN70509_c0_g1	17.3003	0.0999065	7.43601	0.000644418	0.0401863	up
TRINITY_DN73027_c0_g3	2.3017	0.0134074	7.42353	9.11943e-05	0.0106066	up
TRINITY_DN94426_c0_g4	40.3387	0.239429	7.39642	1.0687e-06	0.000409419	up
TRINITY_DN89051_c3_g1	11.5328	0.0699647	7.3649	9.62754e-05	0.011065	up
TRINITY_DN80593_c0_g4	4.73493	0.0315139	7.23121	0.000488559	0.0337078	up
TRINITY_DN98037_c2_g2	1.79195	0.0122053	7.19788	0.000126374	0.0134124	up
TRINITY_DN93895_c0_g1	20.4471	0.156927	7.02566	0.000855488	0.0479002	up
TRINITY_DN90585_c1_g1	145.334	1.13274	7.00341	9.97651e-05	0.0113318	up
TRINITY_DN43666_c0_g1	18.5362	0.147536	6.97313	3.07472e-05	0.00489194	up
TRINITY_DN77429_c3_g2	3.00381	0.0252026	6.89708	9.55378e-05	0.0110092	up
TRINITY_DN74303_c1_g2	2.84437	0.0242538	6.87375	0.000127634	0.0134829	up
TRINITY_DN92891_c1_g7	2.55715	0.0218481	6.87089	8.57702e-05	0.0101929	up
TRINITY_DN76519_c1_g1	1.92509	0.016819	6.83869	0.000422219	0.0309652	up
TRINITY_DN84729_c0_g2	0.946313	0.00847837	6.80239	0.000605748	0.0385644	up
TRINITY_DN65772_c0_g1	7.92029	0.0715853	6.78975	2.6888e-05	0.00441736	up
TRINITY_DN86800_c3_g1	0.990238	0.00903145	6.77667	0.000203233	0.0191085	up
TRINITY_DN72261_c1_g1	162.801	1.53213	6.73143	3.23587e-06	0.000900138	up
TRINITY_DN94426_c0_g1	17.2646	0.175262	6.62215	8.27433e-07	0.000331531	up
TRINITY_DN73590_c1_g6	6.32338	0.0669972	6.56045	9.01313e-06	0.00196817	up
TRINITY_DN69856_c2_g1	54.5119	0.634737	6.42427	0.000618005	0.0390883	up
TRINITY_DN72521_c0_g1	18.6148	0.216832	6.42373	1.36796e-05	0.0026731	up
TRINITY_DN82832_c2_g1	6.40584	0.074708	6.42198	0.000668461	0.0411474	up
TRINITY_DN80619_c3_g5	0.388948	0.004561	6.41408	0.000845131	0.047503	up
TRINITY_DN79438_c2_g1	15.8318	0.186728	6.40574	6.4832e-07	0.000270951	up
TRINITY_DN69863_c0_g1	587.039	6.9647	6.39725	5.33957e-06	0.00132499	up
TRINITY_DN72725_c4_g4	4.33659	0.0531379	6.35068	1.50528e-06	0.000499932	up
TRINITY_DN54369_c0_g1	2.78056	0.0341368	6.3479	0.000131081	0.0136792	up
TRINITY_DN85775_c0_g2	59.6732	0.740172	6.33308	3.25582e-07	0.000158875	up
TRINITY_DN74378_c1_g2	56.2156	0.698538	6.33049	1.10058e-05	0.00229432	up
TRINITY_DN69863_c1_g1	875.427	10.8813	6.33006	1.25118e-06	0.000444254	up
TRINITY_DN81234_c0_g1	0.359392	0.00450122	6.3191	2.26437e-05	0.00387057	up
TRINITY_DN86786_c2_g2	1.69232	0.0217546	6.28153	6.14959e-08	4.33184e-05	up
TRINITY_DN96590_c0_g1	0.708481	0.00939543	6.23663	3.61327e-05	0.005508	up
TRINITY_DN95431_c1_g2	13.4508	0.1797	6.22596	1.54734e-06	0.000510021	up
TRINITY_DN85775_c0_g1	34.2061	0.467695	6.19254	9.10278e-05	0.0106013	up
TRINITY_DN68078_c0_g1	1.3513	0.018969	6.15456	2.15493e-06	0.000660444	up
TRINITY_DN93179_c0_g3	5.70594	0.080771	6.14248	4.12861e-06	0.00107971	up
TRINITY_DN76930_c2_g3	0.654276	0.00940303	6.12063	0.0003147	0.0250119	up
TRINITY_DN73462_c3_g2	0.465964	0.00671278	6.11716	0.000213691	0.0197511	up
TRINITY_DN83033_c1_g1	404.701	5.84115	6.11446	1.36443e-05	0.00267217	up
TRINITY_DN88571_c0_g1	31.2926	0.471854	6.05134	2.69046e-05	0.00441736	up
TRINITY_DN90933_c1_g1	46.2395	0.703541	6.03835	1.45659e-06	0.000492209	up
TRINITY_DN88611_c1_g1	30.3994	0.472573	6.00736	2.61607e-05	0.00432777	up
TRINITY_DN63092_c0_g1	2.20944	0.0347309	5.99132	0.000634886	0.0398844	up
TRINITY_DN88159_c0_g1	26.1085	0.414143	5.97825	1.0031e-07	6.3491e-05	up
TRINITY_DN99043_c1_g4	1.01676	0.0162845	5.96434	0.000804984	0.0461107	up
TRINITY_DN80680_c1_g1	264.061	4.25177	5.95667	3.49852e-05	0.00540859	up
TRINITY_DN70120_c3_g2	0.172235	0.00284002	5.92234	3.89559e-05	0.00576726	up
TRINITY_DN83033_c1_g2	4388.93	74.5165	5.88017	0.000237345	0.021047	up
TRINITY_DN90933_c1_g3	26.7617	0.457176	5.87128	1.60208e-06	0.000516373	up
TRINITY_DN76990_c3_g1	0.588263	0.0100762	5.86744	0.000449941	0.0321363	up
TRINITY_DN87782_c0_g3	0.590907	0.0107621	5.7789	0.00031413	0.0249944	up
TRINITY_DN74017_c0_g3	6.13794	0.112818	5.76569	9.68976e-05	0.0110839	up
TRINITY_DN92098_c0_g1	6.87015	0.128926	5.73573	0.000295192	0.0242789	up
TRINITY_DN88126_c0_g2	173.965	3.27541	5.73097	0.000301246	0.0244544	up
TRINITY_DN88126_c0_g1	237.822	4.51143	5.72015	3.39041e-06	0.000937158	up
TRINITY_DN83752_c1_g2	52.8345	1.00434	5.71716	2.34492e-05	0.00396942	up
TRINITY_DN65241_c0_g2	70.5614	1.34554	5.71262	9.70982e-05	0.0110866	up
TRINITY_DN87932_c1_g4	0.882839	0.0169976	5.69875	0.000347605	0.0269886	up
TRINITY_DN76359_c0_g1	4.39159	0.0857166	5.67902	5.44286e-05	0.00741682	up
TRINITY_DN81862_c1_g1	83.1214	1.62324	5.67827	0.000309575	0.0248762	up
TRINITY_DN82193_c1_g2	3.37819	0.0673937	5.6475	0.000302596	0.0244957	up
TRINITY_DN75690_c0_g2	0.450679	0.00899587	5.6467	0.000839707	0.0472652	up
TRINITY_DN76367_c0_g1	10.2576	0.208324	5.62173	0.000453161	0.0322331	up
TRINITY_DN71383_c0_g1	2.26352	0.0465975	5.60217	0.000863942	0.0482498	up
TRINITY_DN97342_c0_g1	26.8299	0.554903	5.59546	7.39932e-06	0.0017146	up
TRINITY_DN69251_c0_g1	1.66159	0.0355829	5.54523	0.000470098	0.0329026	up
TRINITY_DN97484_c2_g1	7.75748	0.166183	5.54474	6.32767e-05	0.00820034	up
TRINITY_DN76227_c0_g1	2.10254	0.0452746	5.53729	0.000454844	0.0322569	up
TRINITY_DN73227_c0_g1	7.18188	0.156581	5.51938	0.000135764	0.0140172	up
TRINITY_DN91923_c0_g5	0.438019	0.00969558	5.49752	0.000429828	0.0313653	up
TRINITY_DN85081_c0_g1	9.51001	0.210859	5.4951	0.000642929	0.0401415	up
TRINITY_DN77987_c3_g3	1.22398	0.0275664	5.47253	0.000814952	0.0464645	up
TRINITY_DN81218_c0_g2	2.74338	0.0620162	5.46717	0.000882725	0.0491417	up
TRINITY_DN66837_c0_g1	4.46869	0.103608	5.43065	0.000122166	0.0131483	up
TRINITY_DN74036_c1_g2	6.86234	0.160001	5.42255	0.000441064	0.0318931	up
TRINITY_DN95571_c1_g4	3.45617	0.0821712	5.3944	0.000566104	0.0369287	up
TRINITY_DN69220_c0_g3	17.5764	0.442099	5.31312	0.000309124	0.0248709	up
TRINITY_DN87663_c1_g2	3923.54	99.0778	5.30745	0.000202448	0.0190963	up
TRINITY_DN69563_c0_g1	7.48159	0.189005	5.30685	1.48457e-06	0.000494935	up
TRINITY_DN69220_c0_g1	63.1017	1.64128	5.26478	3.03491e-05	0.00484627	up
TRINITY_DN74378_c1_g1	252.467	6.76541	5.22177	3.14312e-05	0.00495907	up
TRINITY_DN98373_c0_g1	31.5286	0.861895	5.193	0.000165005	0.0164341	up
TRINITY_DN79919_c3_g8	12.8959	0.361273	5.15767	0.000340282	0.0266331	up
TRINITY_DN97632_c3_g1	8.82325	0.251103	5.13496	1.19734e-05	0.00243219	up
TRINITY_DN65055_c0_g1	1.55726	0.0453295	5.10242	0.000229329	0.0206551	up
TRINITY_DN94857_c1_g1	9.96965	0.294271	5.08233	7.15325e-06	0.00167511	up
TRINITY_DN79660_c0_g2	263.955	7.94893	5.05339	0.000229378	0.0206551	up
TRINITY_DN88163_c1_g2	31.9528	0.963453	5.05158	8.91239e-05	0.0105057	up
TRINITY_DN72538_c0_g1	20.7605	0.634207	5.03274	6.91375e-05	0.00868278	up
TRINITY_DN83309_c0_g1	67.8378	2.08303	5.02533	0.000114243	0.0124735	up
TRINITY_DN76519_c0_g4	1.67587	0.0528183	4.98772	0.000220004	0.0201011	up
TRINITY_DN77263_c0_g1	7.56719	0.240132	4.97786	0.000112281	0.0123641	up
TRINITY_DN93179_c1_g1	13.8681	0.458377	4.91909	6.50531e-05	0.00835616	up
TRINITY_DN87161_c2_g2	21.4096	0.710085	4.91412	1.7374e-05	0.00318376	up
TRINITY_DN75687_c0_g7	2.49649	0.0830413	4.90993	0.00016835	0.0167101	up
TRINITY_DN86197_c2_g3	7.65704	0.257502	4.89413	0.000166468	0.0165421	up
TRINITY_DN62698_c0_g1	12.2363	0.415525	4.88008	6.85423e-05	0.0086392	up
TRINITY_DN88163_c1_g3	76.815	2.62546	4.87075	1.65924e-06	0.000532831	up
TRINITY_DN86197_c2_g1	16.9275	0.591051	4.83994	0.000733274	0.0435117	up
TRINITY_DN89209_c0_g1	89.3553	3.24209	4.78456	1.61693e-05	0.00301138	up
TRINITY_DN83764_c0_g1	3.2407	0.123098	4.71843	1.09806e-05	0.00229432	up
TRINITY_DN96165_c0_g1	1.47744	0.0571901	4.69119	0.000605045	0.0385477	up
TRINITY_DN78103_c0_g2	30.7301	1.21014	4.66641	6.27681e-05	0.0081708	up
TRINITY_DN87468_c0_g3	1.47953	0.0593825	4.63895	0.000273223	0.0231701	up
TRINITY_DN97909_c4_g5	1.52828	0.061552	4.63395	0.00078198	0.0451743	up
TRINITY_DN98711_c1_g1	5.67843	0.237228	4.58114	0.000337324	0.0264253	up
TRINITY_DN88809_c1_g1	2487.15	103.958	4.58041	0.000512834	0.0346439	up
TRINITY_DN85571_c0_g1	4.17825	0.183532	4.50879	5.86516e-06	0.00143102	up
TRINITY_DN68773_c0_g2	21.8338	0.980609	4.47674	3.15665e-05	0.00495907	up
TRINITY_DN89142_c1_g3	2.29252	0.103426	4.47026	1.57202e-05	0.00296569	up
TRINITY_DN92098_c0_g6	243.464	11.1998	4.44216	0.000112392	0.0123641	up
TRINITY_DN94394_c0_g6	3.52795	0.1632	4.43411	2.61263e-06	0.000768367	up
TRINITY_DN91260_c1_g3	5.04508	0.238947	4.40011	6.27521e-05	0.0081708	up
TRINITY_DN93417_c1_g3	7.36546	0.36044	4.35294	0.000178653	0.0173222	up
TRINITY_DN81862_c1_g2	54.5617	2.74719	4.31186	0.000493228	0.0339763	up
TRINITY_DN84415_c1_g2	3.10198	0.15636	4.31025	0.000577575	0.0373977	up
TRINITY_DN78606_c2_g2	3.46164	0.180149	4.26419	0.000553622	0.0364135	up
TRINITY_DN80393_c0_g3	3.50772	0.185536	4.24076	0.000186139	0.017808	up
TRINITY_DN86320_c2_g1	2.94285	0.156188	4.23586	1.73864e-05	0.00318376	up
TRINITY_DN84930_c2_g3	2.48211	0.132741	4.22488	0.000256309	0.0222322	up
TRINITY_DN92079_c0_g2	0.354004	0.0190465	4.21617	0.000472352	0.0329541	up
TRINITY_DN83805_c0_g1	1.34334	0.0725967	4.20977	0.000688118	0.0418851	up
TRINITY_DN65383_c0_g1	0.471306	0.0255251	4.20667	0.000253373	0.0220652	up
TRINITY_DN94686_c1_g4	14.0758	0.763652	4.20415	0.000124512	0.0133099	up
TRINITY_DN91821_c1_g2	32.6878	1.77445	4.20331	0.000190708	0.0181457	up
TRINITY_DN87502_c0_g3	6.10414	0.334294	4.1906	8.33294e-06	0.0018711	up
TRINITY_DN90857_c0_g1	1.22651	0.0678103	4.17691	6.47186e-05	0.00833881	up
TRINITY_DN92098_c0_g7	769.163	42.9141	4.16376	0.000225172	0.0203815	up
TRINITY_DN88072_c0_g1	3.78718	0.213425	4.14933	0.000249718	0.0218339	up
TRINITY_DN93230_c1_g2	1.81403	0.106139	4.09517	5.56522e-05	0.00749006	up
TRINITY_DN75225_c3_g1	5.08697	0.29872	4.08994	5.35871e-05	0.00733647	up
TRINITY_DN83726_c3_g2	4.68692	0.288014	4.02443	0.000128354	0.0135076	up
TRINITY_DN98984_c5_g2	6.1251	0.387309	3.98318	0.000587898	0.0377304	up
TRINITY_DN69351_c2_g1	0.938645	0.0608213	3.94793	0.000176479	0.017185	up
TRINITY_DN98865_c3_g1	10.258	0.688141	3.89791	0.000441803	0.0318931	up
TRINITY_DN98041_c0_g1	2.35129	0.159053	3.88587	0.000415946	0.0306804	up
TRINITY_DN95062_c1_g1	1.23865	0.0876018	3.82167	0.000686386	0.0418379	up
TRINITY_DN87750_c0_g2	0.71257	0.0512327	3.79789	0.000477531	0.0332119	up
TRINITY_DN92062_c0_g2	1.59943	0.117404	3.76801	0.000560376	0.0366644	up
TRINITY_DN65758_c0_g1	4.74029	0.350866	3.75598	0.000497029	0.0341842	up
TRINITY_DN98922_c1_g2	3.88181	0.289501	3.74509	0.000748437	0.0440821	up
TRINITY_DN92611_c2_g2	374.218	28.2029	3.72997	0.000481436	0.0333481	up
TRINITY_DN80482_c1_g1	2.53288	0.192166	3.72035	0.000509196	0.0344884	up
TRINITY_DN81058_c2_g3	306.892	23.3018	3.71922	0.000623514	0.0392954	up
TRINITY_DN80040_c1_g1	4.42214	0.339971	3.70126	0.000527264	0.0351445	up
TRINITY_DN84719_c0_g2	527.31	40.6947	3.69574	0.00066109	0.0408202	up
TRINITY_DN97632_c3_g5	29.0855	2.24883	3.69305	0.000415426	0.030673	up
TRINITY_DN85384_c2_g3	5.41188	0.419131	3.69066	0.0001602	0.016047	up
TRINITY_DN71102_c0_g3	11.2069	0.868289	3.69007	7.9955e-05	0.00963287	up
TRINITY_DN73609_c1_g1	1.47617	0.116125	3.66811	0.000832895	0.0470638	up
TRINITY_DN82420_c1_g3	8.36819	0.684343	3.61212	0.000112625	0.0123742	up
TRINITY_DN81554_c0_g1	1.21274	0.102252	3.56808	0.000230322	0.0206975	up
TRINITY_DN88180_c1_g1	9.30274	0.807434	3.52624	0.000479403	0.0332865	up
TRINITY_DN72374_c0_g1	1.59874	0.138969	3.5241	0.0004218	0.0309605	up
TRINITY_DN97697_c2_g1	176.836	15.4609	3.51572	0.000494397	0.03403	up
TRINITY_DN87634_c2_g3	19.9823	1.78313	3.48624	0.000788779	0.0455069	up
TRINITY_DN96495_c0_g3	4.78073	0.441882	3.4355	0.000819156	0.0465826	up
TRINITY_DN89704_c2_g1	23.1763	2.28116	3.34482	0.000132019	0.0137607	up
TRINITY_DN77486_c1_g1	10.9305	1.10537	3.30576	0.00012598	0.0133869	up
TRINITY_DN87712_c1_g4	25.714	2.61499	3.29768	0.000396411	0.0296449	up
TRINITY_DN96244_c1_g1	9.05414	0.927647	3.28693	0.000642614	0.0401415	up
TRINITY_DN96960_c0_g1	11.3856	1.1746	3.27696	0.000265415	0.0227509	up
TRINITY_DN92983_c0_g4	7.34886	0.773073	3.24884	0.000465875	0.0326985	up
TRINITY_DN69243_c1_g4	24.5927	2.58888	3.24783	0.000257475	0.022289	up
TRINITY_DN71568_c2_g1	22.9159	2.49306	3.20036	0.000117074	0.0127349	up
TRINITY_DN77204_c1_g2	0.68684	0.0786758	3.12598	0.000322803	0.0255397	up
TRINITY_DN74976_c1_g1	13.2613	1.56352	3.08436	0.000499956	0.0342864	up
TRINITY_DN97070_c2_g1	153.773	18.2629	3.07382	0.000569117	0.0370699	up
TRINITY_DN85708_c1_g1	20.2198	2.40633	3.07086	0.000101227	0.011483	up
TRINITY_DN81173_c0_g2	3.32879	0.404111	3.04217	3.03753e-06	0.000863164	up
TRINITY_DN95449_c1_g5	6.88088	0.85855	3.00262	0.000133096	0.0138306	up
TRINITY_DN78303_c0_g1	14.2621	1.79546	2.98976	0.000462612	0.0325606	up
TRINITY_DN78927_c1_g2	29.5743	3.73841	2.98385	0.000405843	0.030221	up
TRINITY_DN76909_c1_g2	15.6219	1.98788	2.97427	0.000539229	0.035735	up
TRINITY_DN90651_c0_g3	34.314	4.37671	2.97088	0.000809187	0.0463172	up
TRINITY_DN97561_c3_g4	27.0176	3.5204	2.94009	0.000718809	0.0429746	up
TRINITY_DN98270_c1_g2	4.86486	0.641842	2.92211	6.3389e-06	0.00151791	up
TRINITY_DN85891_c0_g3	7.13674	0.962795	2.88997	0.000219392	0.0200662	up
TRINITY_DN97099_c0_g1	14.3775	2.14707	2.74338	0.000692396	0.0420283	up
TRINITY_DN73130_c0_g1	16.8866	2.64145	2.67647	0.000109331	0.0121498	up
TRINITY_DN79103_c0_g2	24.33	3.89251	2.64396	8.22855e-05	0.00987279	up
TRINITY_DN75858_c2_g2	7.04952	1.12809	2.64364	0.000142521	0.0145942	up
TRINITY_DN89905_c0_g1	15.9486	2.59213	2.62122	3.63631e-05	0.00553347	up
TRINITY_DN68775_c1_g1	2.60307	0.428442	2.60304	0.000317645	0.0252001	up
TRINITY_DN90582_c2_g1	7.1987	1.21487	2.56693	0.00026418	0.0227119	up
TRINITY_DN89111_c1_g1	111.835	19.2638	2.53741	0.000424072	0.0310253	up
TRINITY_DN84219_c1_g1	1.56067	0.270136	2.53041	0.000671954	0.0412461	up
TRINITY_DN96276_c1_g2	9465.82	1639.7	2.5293	0.000835354	0.0471355	up
TRINITY_DN88687_c3_g3	1.01605	0.178984	2.50507	0.000848512	0.0475956	up
TRINITY_DN90689_c0_g1	1.69171	0.327571	2.3686	0.000294064	0.0242546	up
TRINITY_DN89784_c0_g2	55.5741	11.547	2.26689	0.000346288	0.0269583	up
TRINITY_DN95066_c1_g1	3.67706	0.769967	2.25568	0.000418038	0.0307619	up
TRINITY_DN62622_c0_g1	1.53037	0.334498	2.19382	0.000375243	0.0284693	up
TRINITY_DN95799_c2_g1	7.9988	1.84996	2.11229	0.000445631	0.0320367	up
TRINITY_DN93222_c0_g1	3.01226	0.707524	2.08999	0.000694774	0.0421284	up
TRINITY_DN93351_c0_g1	1.36194	0.401847	1.76095	0.000626787	0.0394438	up
TRINITY_DN90181_c0_g1	1.62339	0.481809	1.75247	0.000281646	0.0236234	up
TRINITY_DN93377_c1_g3	1.10988	0.337124	1.71905	0.000283171	0.023669	up
TRINITY_DN91067_c1_g2	32.2498	10.1705	1.6649	2.81237e-05	0.00458307	up
TRINITY_DN71509_c1_g1	21.7731	7.92752	1.45761	0.000700996	0.0421761	up
TRINITY_DN93357_c0_g2	11.1936	4.35298	1.3626	0.000541366	0.0357691	up
TRINITY_DN67687_c1_g1	0.779537	2.16294	-1.4723	0.000837597	0.0472315	down
TRINITY_DN77043_c0_g1	6.25135	17.8131	-1.5107	0.000245425	0.0215538	down
TRINITY_DN84439_c1_g3	1.94604	5.64485	-1.53639	0.000385361	0.0290424	down
TRINITY_DN73439_c0_g2	2.40041	6.96816	-1.53749	0.0005768	0.0373752	down
TRINITY_DN82522_c0_g2	2.13458	6.2151	-1.54182	0.000525169	0.0350435	down
TRINITY_DN63799_c0_g2	0.134297	0.396413	-1.56157	0.000736485	0.043643	down
TRINITY_DN90706_c1_g1	2.04818	6.05471	-1.56371	0.000189145	0.0180381	down
TRINITY_DN76308_c0_g1	18.3246	55.8198	-1.60699	0.000768435	0.0447317	down
TRINITY_DN76864_c1_g2	0.384905	1.18434	-1.62151	0.000690901	0.0419667	down
TRINITY_DN94176_c0_g2	4.1357	12.7875	-1.62853	0.000498416	0.0342527	down
TRINITY_DN85162_c2_g1	0.436416	1.36804	-1.64834	4.0728e-05	0.00595891	down
TRINITY_DN72805_c1_g1	1.17878	3.87867	-1.71827	0.000407052	0.0302741	down
TRINITY_DN88639_c0_g2	5.01655	16.6366	-1.72959	0.00042404	0.0310253	down
TRINITY_DN72902_c1_g3	6.11617	20.4715	-1.74291	0.000440832	0.0318931	down
TRINITY_DN98842_c1_g3	3.36566	11.5082	-1.7737	0.000804705	0.0461107	down
TRINITY_DN94806_c1_g1	1.86241	6.38002	-1.77639	0.000374347	0.0284331	down
TRINITY_DN88793_c2_g2	0.243854	0.846572	-1.79561	0.000731178	0.0434457	down
TRINITY_DN91806_c1_g1	0.208121	0.731171	-1.81279	0.000128116	0.0134988	down
TRINITY_DN96161_c3_g3	2.51545	8.85599	-1.81584	0.000255517	0.0222076	down
TRINITY_DN81482_c0_g1	1.42873	5.03649	-1.81769	1.21643e-05	0.00245952	down
TRINITY_DN96246_c1_g3	3.64416	12.9312	-1.8272	0.000263339	0.0226843	down
TRINITY_DN68555_c0_g2	0.259666	0.968642	-1.89931	0.000791483	0.0456139	down
TRINITY_DN79123_c2_g1	1.6849	6.31973	-1.9072	0.000742884	0.0439031	down
TRINITY_DN78002_c4_g4	4.88585	18.9989	-1.95923	0.000599915	0.0383137	down
TRINITY_DN77954_c3_g1	18.807	74.4926	-1.98583	8.98856e-05	0.0105386	down
TRINITY_DN70051_c3_g3	0.30133	1.24314	-2.04458	0.000157277	0.0158086	down
TRINITY_DN64959_c0_g2	0.0734493	0.306395	-2.06057	0.000671039	0.0412189	down
TRINITY_DN69607_c1_g1	0.0833727	0.355071	-2.09046	0.000125471	0.0133653	down
TRINITY_DN88959_c0_g1	3.28332	13.9847	-2.09062	0.00029014	0.0240217	down
TRINITY_DN98883_c5_g2	1.47286	6.30371	-2.09758	0.000623853	0.0392954	down
TRINITY_DN64543_c1_g2	0.0448395	0.193259	-2.10769	0.000580961	0.0375057	down
TRINITY_DN82783_c0_g4	2.17029	9.45303	-2.12289	0.000416228	0.0306804	down
TRINITY_DN78822_c1_g1	0.885329	3.9913	-2.17257	0.000278528	0.0234832	down
TRINITY_DN69285_c3_g1	0.253752	1.1476	-2.17713	0.000696433	0.0421761	down
TRINITY_DN71770_c1_g1	2.08475	9.73968	-2.224	0.000592912	0.0379407	down
TRINITY_DN94990_c1_g2	4.02128	18.95	-2.23647	6.00144e-07	0.000256703	down
TRINITY_DN67440_c3_g1	0.102687	0.48426	-2.23753	0.000300931	0.0244544	down
TRINITY_DN78692_c1_g4	0.404364	1.91615	-2.24448	0.00018051	0.0174414	down
TRINITY_DN83334_c0_g1	22.2519	105.951	-2.25139	0.000150845	0.0153386	down
TRINITY_DN98725_c1_g1	1.84667	8.90381	-2.26949	0.000223147	0.0202611	down
TRINITY_DN70128_c0_g3	0.491285	2.38682	-2.28046	0.000674503	0.0413533	down
TRINITY_DN81456_c0_g3	0.646141	3.14852	-2.28475	0.000397906	0.0296957	down
TRINITY_DN68334_c1_g2	0.457177	2.22876	-2.28542	0.000267415	0.0228551	down
TRINITY_DN77528_c0_g1	0.562376	2.81483	-2.32344	0.000441809	0.0318931	down
TRINITY_DN68909_c1_g1	0.290743	1.46077	-2.32891	2.89278e-05	0.00466191	down
TRINITY_DN70213_c0_g1	1.21105	6.22451	-2.36171	4.73233e-06	0.00120864	down
TRINITY_DN72217_c1_g1	3.36936	17.4422	-2.37203	0.000725766	0.0432425	down
TRINITY_DN91704_c0_g1	0.474422	2.4983	-2.39671	0.000233819	0.0208189	down
TRINITY_DN83339_c2_g1	2.57951	13.6944	-2.40842	0.00064972	0.0403548	down
TRINITY_DN92422_c0_g1	0.655868	3.49762	-2.4149	0.000324833	0.0256771	down
TRINITY_DN68529_c1_g4	0.247005	1.3444	-2.44435	5.96341e-05	0.00784467	down
TRINITY_DN67901_c1_g1	1.44772	7.97562	-2.46182	0.000894136	0.049682	down
TRINITY_DN80469_c1_g1	0.395197	2.18407	-2.46637	0.000285872	0.0237358	down
TRINITY_DN91704_c0_g2	0.141837	0.789432	-2.47658	0.000831908	0.0470626	down
TRINITY_DN79620_c1_g1	1.08173	6.02246	-2.47701	0.000698306	0.0421761	down
TRINITY_DN90412_c3_g3	0.236507	1.34488	-2.50753	0.000282493	0.0236349	down
TRINITY_DN74566_c2_g1	0.934256	5.32278	-2.51029	4.1336e-05	0.00602767	down
TRINITY_DN98985_c3_g2	1.61241	9.29429	-2.52712	0.000212448	0.0196784	down
TRINITY_DN83264_c1_g3	0.717072	4.17289	-2.54086	0.000203495	0.0191097	down
TRINITY_DN86596_c1_g1	0.327486	1.92032	-2.55184	0.000529389	0.0352175	down
TRINITY_DN96781_c1_g1	0.48308	2.84066	-2.55589	0.000474443	0.0330472	down
TRINITY_DN94494_c1_g1	3.1946	18.865	-2.562	0.000739017	0.0437615	down
TRINITY_DN81157_c0_g3	37.4114	222.287	-2.57087	0.000446036	0.0320394	down
TRINITY_DN70311_c0_g1	1.3057	7.93162	-2.60279	0.000523029	0.0349541	down
TRINITY_DN72325_c2_g3	1.01945	6.23576	-2.61277	0.000482179	0.0333504	down
TRINITY_DN92566_c1_g1	0.294319	1.8143	-2.62395	4.05156e-05	0.00593778	down
TRINITY_DN76496_c0_g2	0.620732	3.85457	-2.63453	0.000154993	0.0156593	down
TRINITY_DN68333_c0_g1	0.156689	0.973649	-2.6355	5.15871e-06	0.00129482	down
TRINITY_DN77724_c1_g1	2.28666	14.3028	-2.64498	0.000706412	0.0424089	down
TRINITY_DN68175_c1_g1	0.15589	0.997959	-2.67845	0.000709681	0.0425745	down
TRINITY_DN94646_c0_g2	0.319468	2.04812	-2.68055	0.000303604	0.0245319	down
TRINITY_DN98854_c1_g1	0.459772	2.95263	-2.68301	5.87951e-05	0.0077694	down
TRINITY_DN80278_c0_g2	0.14837	0.962996	-2.69833	1.21999e-06	0.00043495	down
TRINITY_DN77126_c1_g3	0.960206	6.39356	-2.7352	0.000811383	0.0463843	down
TRINITY_DN62522_c0_g1	0.0855026	0.578674	-2.75871	0.000573772	0.0373174	down
TRINITY_DN74109_c2_g2	1.63727	11.1278	-2.7648	0.000773719	0.0448454	down
TRINITY_DN74410_c0_g3	1.70685	11.6116	-2.76615	0.000217368	0.0199438	down
TRINITY_DN72321_c1_g1	0.60879	4.28408	-2.81497	3.51003e-05	0.0054168	down
TRINITY_DN97392_c1_g1	1.56599	11.1181	-2.82777	0.000675254	0.0413533	down
TRINITY_DN66456_c0_g1	0.152509	1.08449	-2.83005	0.000255974	0.0222252	down
TRINITY_DN64403_c0_g1	0.0371455	0.270956	-2.8668	0.000824855	0.0468152	down
TRINITY_DN71851_c1_g1	0.258887	1.905	-2.8794	0.000506377	0.0344274	down
TRINITY_DN69729_c2_g1	0.117721	0.866948	-2.88058	1.93699e-06	0.000597845	down
TRINITY_DN85757_c2_g1	0.182502	1.36143	-2.89913	0.000647298	0.040299	down
TRINITY_DN69397_c0_g2	0.399481	2.98039	-2.8993	0.000269735	0.0229411	down
TRINITY_DN72152_c0_g1	2.08093	15.7071	-2.91611	0.000169207	0.0167422	down
TRINITY_DN90216_c1_g2	0.325366	2.46766	-2.92301	0.000482284	0.0333504	down
TRINITY_DN69338_c2_g1	0.393742	3.04062	-2.94904	0.000137723	0.0141692	down
TRINITY_DN71739_c1_g2	0.416352	3.29179	-2.983	0.000395651	0.0296222	down
TRINITY_DN68667_c0_g1	0.102931	0.814622	-2.98446	0.000761923	0.0445162	down
TRINITY_DN84082_c0_g2	0.284765	2.25631	-2.98613	1.42153e-05	0.00275597	down
TRINITY_DN67328_c0_g1	0.0322723	0.256524	-2.99072	0.000517635	0.0346998	down
TRINITY_DN75705_c0_g2	0.166338	1.32838	-2.99748	0.000411303	0.0305065	down
TRINITY_DN68135_c0_g1	0.0786224	0.632172	-3.0073	7.68848e-05	0.00940568	down
TRINITY_DN85196_c1_g2	0.866238	6.9987	-3.01425	0.000313197	0.0249944	down
TRINITY_DN77323_c1_g2	0.639693	5.20123	-3.0234	2.65677e-06	0.000776124	down
TRINITY_DN85505_c0_g2	7.02805	57.5318	-3.03316	0.000395767	0.0296222	down
TRINITY_DN74058_c4_g4	0.262039	2.14791	-3.03508	0.000366312	0.0280053	down
TRINITY_DN88151_c0_g2	0.0523919	0.437547	-3.06202	5.90942e-05	0.00779713	down
TRINITY_DN69169_c0_g1	0.280647	2.35524	-3.06905	0.000348285	0.0270174	down
TRINITY_DN78586_c1_g1	1.723	14.6386	-3.08679	0.000335718	0.0263231	down
TRINITY_DN77137_c0_g3	3.62025	30.7731	-3.08751	0.000220896	0.0201074	down
TRINITY_DN93651_c1_g1	0.280428	2.38412	-3.08775	0.000857985	0.0479785	down
TRINITY_DN88604_c0_g2	0.254206	2.16373	-3.08945	0.000617831	0.0390883	down
TRINITY_DN98695_c2_g2	0.325869	2.79801	-3.10204	2.34146e-05	0.00396942	down
TRINITY_DN73660_c3_g3	0.0365871	0.315653	-3.10893	0.000175657	0.017124	down
TRINITY_DN96663_c0_g1	0.219321	1.90819	-3.12109	0.000274363	0.0232217	down
TRINITY_DN92591_c0_g4	0.483173	4.22456	-3.12819	9.96289e-06	0.00213291	down
TRINITY_DN70594_c2_g1	0.140727	1.23746	-3.13641	3.85468e-05	0.00571637	down
TRINITY_DN79322_c0_g1	1.19653	10.5436	-3.13944	6.54182e-05	0.00837843	down
TRINITY_DN71404_c1_g3	0.269579	2.38073	-3.14262	1.11657e-05	0.00230858	down
TRINITY_DN78297_c0_g1	0.384695	3.40672	-3.1466	0.000847637	0.0475826	down
TRINITY_DN67207_c3_g1	0.136701	1.2298	-3.16933	1.11799e-05	0.00230858	down
TRINITY_DN89333_c1_g4	0.409172	3.71524	-3.18267	3.21168e-05	0.00503645	down
TRINITY_DN67702_c3_g2	0.543322	4.93576	-3.18339	0.000780578	0.0451531	down
TRINITY_DN74779_c2_g3	0.157972	1.4406	-3.18893	5.73268e-05	0.00761306	down
TRINITY_DN70735_c1_g1	1.12027	10.3016	-3.20096	0.000276894	0.023368	down
TRINITY_DN66604_c0_g1	0.0489113	0.458064	-3.22731	0.000506424	0.0344274	down
TRINITY_DN98115_c0_g1	1.3194	12.4336	-3.23629	4.2935e-06	0.00111614	down
TRINITY_DN68225_c4_g2	0.0966632	0.917408	-3.24652	0.000180502	0.0174414	down
TRINITY_DN92811_c0_g3	3.68744	35.4066	-3.26333	0.000623979	0.0392954	down
TRINITY_DN95661_c0_g2	1.07563	10.3845	-3.27118	5.2241e-05	0.00722009	down
TRINITY_DN85967_c0_g2	0.236593	2.29328	-3.27693	1.42658e-05	0.0027568	down
TRINITY_DN80260_c1_g1	0.178242	1.73158	-3.28018	0.000235056	0.0208653	down
TRINITY_DN79818_c2_g1	0.0643669	0.626363	-3.28261	6.02472e-07	0.000256703	down
TRINITY_DN69188_c1_g1	0.129879	1.26642	-3.28552	0.000428425	0.0313152	down
TRINITY_DN68893_c0_g1	0.310116	3.02772	-3.28735	0.000539623	0.035735	down
TRINITY_DN83998_c0_g1	0.247285	2.41912	-3.29024	5.50984e-05	0.00746151	down
TRINITY_DN71563_c1_g4	5.98164	59.9326	-3.32473	0.000487686	0.0336742	down
TRINITY_DN69159_c1_g1	0.333152	3.34022	-3.32569	1.86905e-05	0.00338503	down
TRINITY_DN80419_c2_g1	0.105429	1.06207	-3.33253	7.23434e-05	0.00895039	down
TRINITY_DN88378_c0_g1	1.39603	14.0785	-3.33409	0.000222673	0.0202391	down
TRINITY_DN75823_c3_g2	0.22628	2.28999	-3.33916	0.000463431	0.032592	down
TRINITY_DN68369_c3_g2	0.183518	1.85766	-3.3395	0.000313714	0.0249944	down
TRINITY_DN70114_c2_g1	1.85631	18.8621	-3.34498	0.000580361	0.0374947	down
TRINITY_DN76211_c0_g1	6.02151	61.2939	-3.34755	0.000366976	0.0280053	down
TRINITY_DN73649_c0_g2	1.46426	15.0787	-3.36427	0.000701029	0.0421761	down
TRINITY_DN75077_c1_g1	0.199765	2.07381	-3.37591	0.000120388	0.0130304	down
TRINITY_DN76796_c1_g1	0.61218	6.38999	-3.38379	0.000768685	0.0447317	down
TRINITY_DN86622_c0_g1	0.155542	1.62449	-3.38461	0.00069501	0.0421284	down
TRINITY_DN75271_c1_g2	0.174619	1.82951	-3.38917	0.000763171	0.0445593	down
TRINITY_DN68506_c1_g1	0.0611778	0.642111	-3.39174	2.07284e-05	0.00364298	down
TRINITY_DN68239_c0_g1	0.0264652	0.277822	-3.39199	0.000367753	0.0280053	down
TRINITY_DN73939_c2_g4	0.136582	1.44509	-3.40332	0.000784071	0.0452652	down
TRINITY_DN72971_c0_g1	0.411691	4.40915	-3.42087	0.000583464	0.037584	down
TRINITY_DN67706_c0_g1	0.0397064	0.426976	-3.42671	0.000264532	0.0227198	down
TRINITY_DN75898_c1_g1	0.554272	5.96213	-3.42716	0.00015195	0.015433	down
TRINITY_DN70070_c0_g2	0.187515	2.02514	-3.43295	0.000233549	0.0208189	down
TRINITY_DN80964_c2_g4	4.18689	45.2667	-3.4345	0.000249607	0.0218339	down
TRINITY_DN70583_c1_g1	0.899079	9.78692	-3.44433	0.000309224	0.0248709	down
TRINITY_DN78868_c1_g1	0.942532	10.2621	-3.44464	2.65892e-05	0.0043832	down
TRINITY_DN74527_c0_g2	0.980682	10.8172	-3.4634	0.000343787	0.0268594	down
TRINITY_DN66615_c1_g2	0.0460361	0.515925	-3.48632	0.000528954	0.0352154	down
TRINITY_DN67486_c0_g2	0.0326497	0.367881	-3.4941	1.67523e-06	0.000535994	down
TRINITY_DN96502_c0_g4	5.59915	63.2934	-3.49877	0.000355195	0.0274317	down
TRINITY_DN74872_c1_g1	9.41978	106.759	-3.50252	0.000582305	0.0375432	down
TRINITY_DN82791_c0_g2	0.264797	3.03541	-3.51893	5.49224e-05	0.00746082	down
TRINITY_DN80342_c0_g1	0.196741	2.25886	-3.52122	0.000723953	0.0431934	down
TRINITY_DN76737_c1_g3	0.40902	4.72285	-3.52941	0.000665133	0.0410003	down
TRINITY_DN70569_c0_g3	0.084123	0.976038	-3.53636	0.000159297	0.0159933	down
TRINITY_DN98658_c4_g1	2.10232	24.3926	-3.53639	0.00036616	0.0280053	down
TRINITY_DN69036_c1_g2	0.196337	2.28379	-3.54002	0.000760842	0.0444828	down
TRINITY_DN90268_c0_g1	0.0508825	0.595224	-3.54819	2.54335e-05	0.00423791	down
TRINITY_DN72271_c0_g1	0.528163	6.18708	-3.5502	0.000746383	0.0439908	down
TRINITY_DN74340_c1_g1	0.105804	1.25434	-3.56746	3.03496e-06	0.000863164	down
TRINITY_DN70792_c1_g1	0.517782	6.19566	-3.58084	0.000780124	0.0451531	down
TRINITY_DN70087_c1_g2	0.481337	5.76224	-3.58151	0.000112197	0.0123641	down
TRINITY_DN98652_c7_g3	4.33462	52.1194	-3.58784	0.000502592	0.0343577	down
TRINITY_DN77137_c0_g1	0.511362	6.16035	-3.59059	9.28677e-05	0.0107725	down
TRINITY_DN80496_c1_g1	0.0801717	0.967742	-3.59346	0.000740303	0.0437801	down
TRINITY_DN84144_c0_g1	0.274549	3.31665	-3.59459	0.000183976	0.0176591	down
TRINITY_DN84820_c1_g3	0.0895147	1.09185	-3.60851	0.000311971	0.0249771	down
TRINITY_DN68826_c2_g1	0.0461186	0.564324	-3.6131	0.000432916	0.0314753	down
TRINITY_DN67480_c0_g2	0.173038	2.15409	-3.63792	0.00054051	0.0357471	down
TRINITY_DN67159_c0_g1	0.0242861	0.303054	-3.64137	7.14816e-05	0.00887668	down
TRINITY_DN70696_c0_g4	1.121	14.0198	-3.64461	0.000351085	0.0271623	down
TRINITY_DN69759_c1_g1	0.0586906	0.74285	-3.66187	2.10181e-05	0.00367174	down
TRINITY_DN82313_c1_g1	0.270006	3.44446	-3.67321	1.12831e-06	0.000422979	down
TRINITY_DN68465_c3_g3	0.0632487	0.808367	-3.6759	0.000106095	0.0118656	down
TRINITY_DN71259_c1_g1	0.0222329	0.287157	-3.69107	0.000830928	0.0470376	down
TRINITY_DN88080_c0_g1	0.789412	10.2637	-3.70063	6.75057e-05	0.00855794	down
TRINITY_DN67907_c2_g1	0.117901	1.54459	-3.71158	0.000203683	0.0191097	down
TRINITY_DN65638_c0_g1	0.0169192	0.222529	-3.71726	0.000846057	0.0475245	down
TRINITY_DN57962_c0_g1	0.0533242	0.701633	-3.71786	0.000734439	0.0435513	down
TRINITY_DN80650_c1_g1	0.0826464	1.089	-3.7199	1.6962e-05	0.00313231	down
TRINITY_DN64862_c0_g1	0.0374266	0.493315	-3.72037	0.000458527	0.0323775	down
TRINITY_DN79264_c2_g5	0.101746	1.34139	-3.72068	0.000717483	0.0429541	down
TRINITY_DN81917_c1_g1	0.0345157	0.455437	-3.72192	0.000582402	0.0375432	down
TRINITY_DN73837_c0_g2	0.0435263	0.575429	-3.72468	0.000238352	0.0210935	down
TRINITY_DN77221_c1_g1	1.53775	20.4057	-3.73008	4.62411e-06	0.00118795	down
TRINITY_DN71989_c0_g1	0.0874823	1.16191	-3.73136	6.07703e-06	0.00147039	down
TRINITY_DN77322_c1_g10	0.105439	1.4033	-3.73434	9.21799e-05	0.010707	down
TRINITY_DN73737_c1_g6	0.0421597	0.563012	-3.73923	0.000334382	0.0262419	down
TRINITY_DN67323_c2_g1	0.183184	2.46197	-3.74845	0.000698062	0.0421761	down
TRINITY_DN69062_c4_g3	0.0482602	0.650187	-3.75195	0.000218272	0.0200057	down
TRINITY_DN65811_c0_g2	0.0833078	1.12377	-3.75375	0.000180852	0.0174551	down
TRINITY_DN69649_c0_g2	0.179809	2.44068	-3.76275	7.959e-06	0.0018104	down
TRINITY_DN72379_c0_g1	0.179678	2.44909	-3.76876	0.000123721	0.0132597	down
TRINITY_DN70745_c1_g1	0.410307	5.61298	-3.77399	0.000281557	0.0236234	down
TRINITY_DN95738_c4_g3	0.16304	2.23491	-3.77691	6.85873e-07	0.000283929	down
TRINITY_DN79904_c2_g2	0.0556371	0.762825	-3.77723	9.096e-05	0.0106013	down
TRINITY_DN69463_c3_g1	0.960815	13.2068	-3.78088	1.71309e-07	9.47074e-05	down
TRINITY_DN70567_c2_g3	0.0748551	1.03753	-3.79291	0.000557872	0.0366379	down
TRINITY_DN66261_c0_g1	0.021343	0.29798	-3.80338	0.00021154	0.0196359	down
TRINITY_DN94622_c0_g2	2.91802	40.9069	-3.80928	7.16948e-05	0.00888273	down
TRINITY_DN79547_c0_g2	0.0980095	1.38209	-3.81778	6.56992e-05	0.0084021	down
TRINITY_DN66857_c1_g1	0.0428463	0.604892	-3.81944	8.81294e-05	0.0104166	down
TRINITY_DN67574_c1_g1	0.0559233	0.789539	-3.81949	0.000281955	0.0236234	down
TRINITY_DN70995_c0_g1	0.020731	0.293271	-3.82237	0.00028496	0.0237277	down
TRINITY_DN65936_c1_g1	0.036528	0.521701	-3.83615	0.000466067	0.0326985	down
TRINITY_DN96663_c0_g2	0.184513	2.64113	-3.83936	0.000661278	0.0408202	down
TRINITY_DN67027_c0_g3	0.0390398	0.562668	-3.84927	0.000128889	0.0135313	down
TRINITY_DN77662_c0_g4	0.346957	5.04716	-3.86264	0.000584505	0.0375905	down
TRINITY_DN92377_c2_g2	0.143593	2.11602	-3.8813	8.64239e-06	0.00190628	down
TRINITY_DN90317_c1_g1	28.2854	417.403	-3.88331	0.000444023	0.0320001	down
TRINITY_DN62581_c0_g1	0.040389	0.596263	-3.88391	0.000718144	0.0429642	down
TRINITY_DN68743_c0_g1	0.0448755	0.663115	-3.88526	5.66607e-05	0.00756749	down
TRINITY_DN68257_c0_g1	0.0418978	0.621472	-3.89074	2.26345e-05	0.00387057	down
TRINITY_DN82718_c0_g1	0.291875	4.35507	-3.89927	0.000297921	0.0243656	down
TRINITY_DN86879_c0_g3	29.9077	447.751	-3.90411	0.00049154	0.0338868	down
TRINITY_DN94414_c0_g5	2.12739	32.0026	-3.91103	8.94054e-05	0.0105105	down
TRINITY_DN68626_c2_g2	0.0414991	0.624876	-3.91242	0.000203211	0.0191085	down
TRINITY_DN68936_c0_g1	0.121528	1.83389	-3.91554	1.2675e-05	0.00253346	down
TRINITY_DN89710_c2_g4	0.342716	5.20784	-3.9256	0.000210845	0.0195923	down
TRINITY_DN64061_c0_g1	0.0208004	0.316242	-3.92635	0.00018165	0.0174742	down
TRINITY_DN73941_c0_g1	0.0555656	0.847199	-3.93044	0.000596487	0.0381415	down
TRINITY_DN92218_c0_g2	0.168954	2.58303	-3.93436	0.000758682	0.0444159	down
TRINITY_DN74057_c1_g2	0.0546655	0.83591	-3.93464	5.1441e-05	0.00714343	down
TRINITY_DN71660_c1_g3	0.0179408	0.275679	-3.94167	5.34989e-05	0.0073359	down
TRINITY_DN94354_c0_g1	14.3351	221.301	-3.94839	0.000104346	0.0117279	down
TRINITY_DN72227_c1_g1	0.203955	3.18028	-3.96283	8.5315e-06	0.00189619	down
TRINITY_DN75494_c4_g1	0.354738	5.55863	-3.9699	0.000231851	0.020756	down
TRINITY_DN68082_c1_g3	0.236107	3.71385	-3.9754	0.000609302	0.038706	down
TRINITY_DN71538_c2_g1	0.0407356	0.643906	-3.98249	0.000706434	0.0424089	down
TRINITY_DN750_c0_g1	0.0147213	0.232846	-3.9834	0.00081179	0.0463843	down
TRINITY_DN68412_c4_g4	0.0293757	0.465578	-3.98633	0.000224791	0.020368	down
TRINITY_DN95756_c1_g3	5.41787	86.0757	-3.98981	0.000200036	0.0189253	down
TRINITY_DN87791_c1_g1	0.0899365	1.43203	-3.99301	0.00017747	0.0172622	down
TRINITY_DN99007_c12_g2	0.101941	1.64924	-4.01599	0.000654993	0.0405469	down
TRINITY_DN70552_c1_g1	0.0195476	0.316972	-4.01929	0.000515511	0.0346905	down
TRINITY_DN68707_c1_g1	0.14716	2.38969	-4.02136	0.000663741	0.0409434	down
TRINITY_DN73909_c1_g2	0.0266663	0.437407	-4.03589	0.000156446	0.0157432	down
TRINITY_DN67417_c0_g1	0.0757058	1.24204	-4.03616	1.19539e-06	0.000429848	down
TRINITY_DN63693_c0_g1	0.0282682	0.463796	-4.03624	0.000518582	0.0347366	down
TRINITY_DN70996_c2_g9	0.024497	0.404386	-4.04505	0.000449055	0.0321363	down
TRINITY_DN67937_c0_g1	0.0173042	0.286174	-4.0477	0.000140412	0.0144289	down
TRINITY_DN77137_c0_g5	3.10216	51.3163	-4.04807	2.12473e-05	0.00368665	down
TRINITY_DN63221_c0_g1	0.0254714	0.421423	-4.04832	0.000252129	0.0220007	down
TRINITY_DN69194_c2_g4	0.0280027	0.464308	-4.05144	1.60934e-05	0.00300366	down
TRINITY_DN63759_c0_g1	0.0297225	0.49463	-4.05672	0.0005597	0.0366644	down
TRINITY_DN68224_c1_g5	13.1493	219.34	-4.06011	4.42908e-05	0.00637398	down
TRINITY_DN72258_c1_g4	0.063797	1.07227	-4.07104	0.000170189	0.0167782	down
TRINITY_DN66181_c0_g1	0.0489572	0.823867	-4.07282	3.14688e-05	0.00495907	down
TRINITY_DN78928_c3_g2	0.0691035	1.16376	-4.07389	0.000515051	0.0346905	down
TRINITY_DN72747_c2_g1	0.140373	2.36773	-4.07617	1.94319e-05	0.00346392	down
TRINITY_DN85188_c0_g1	0.360261	6.1004	-4.08179	0.00071639	0.0429181	down
TRINITY_DN98002_c0_g1	0.0288429	0.493677	-4.09728	0.000616921	0.0390763	down
TRINITY_DN72163_c1_g1	0.106974	1.83232	-4.09834	4.441e-05	0.00637398	down
TRINITY_DN78241_c0_g1	0.209237	3.60029	-4.1049	1.64201e-05	0.00304511	down
TRINITY_DN83796_c0_g2	0.112353	1.94522	-4.11382	0.000889568	0.0494911	down
TRINITY_DN65446_c0_g1	0.0307823	0.534209	-4.11723	8.753e-05	0.0103738	down
TRINITY_DN70275_c0_g1	0.0282753	0.495727	-4.13193	0.000801872	0.0460191	down
TRINITY_DN68044_c6_g2	0.0273272	0.480594	-4.13641	7.35447e-05	0.00907332	down
TRINITY_DN67431_c0_g1	0.054308	0.958685	-4.14182	6.81171e-06	0.00161242	down
TRINITY_DN69048_c2_g1	0.0811045	1.441	-4.15114	1.4813e-05	0.00281277	down
TRINITY_DN88350_c5_g3	15.25	271.834	-4.15584	0.000181429	0.0174722	down
TRINITY_DN66567_c0_g2	0.0149872	0.268766	-4.16455	0.000515445	0.0346905	down
TRINITY_DN95239_c3_g1	0.0458379	0.822626	-4.16562	0.000849925	0.0476192	down
TRINITY_DN65229_c1_g1	0.0255761	0.464113	-4.18161	0.000286215	0.0237417	down
TRINITY_DN90268_c0_g3	0.0296627	0.539256	-4.18425	0.000817353	0.046571	down
TRINITY_DN73769_c1_g2	0.0417718	0.76087	-4.18705	0.000513878	0.0346876	down
TRINITY_DN96502_c0_g6	5.45349	100.178	-4.19924	9.38619e-05	0.0108425	down
TRINITY_DN68500_c2_g3	0.0289318	0.534012	-4.20614	9.68003e-05	0.0110839	down
TRINITY_DN68769_c0_g1	0.0495306	0.915248	-4.20777	7.07492e-05	0.00881358	down
TRINITY_DN68969_c3_g3	0.136905	2.54382	-4.21575	0.000585287	0.0375905	down
TRINITY_DN74118_c0_g1	0.0625249	1.17045	-4.22649	6.77866e-06	0.00161242	down
TRINITY_DN55602_c0_g1	0.0177962	0.334086	-4.23058	0.000116161	0.0126513	down
TRINITY_DN73831_c2_g1	0.048585	0.917869	-4.23971	0.000464179	0.0326184	down
TRINITY_DN85720_c1_g1	0.595936	11.4893	-4.26899	1.27799e-05	0.0025428	down
TRINITY_DN7851_c0_g1	0.0146047	0.28292	-4.2759	0.000507161	0.0344471	down
TRINITY_DN62267_c0_g1	0.024578	0.477975	-4.2815	0.00045681	0.0323085	down
TRINITY_DN7858_c0_g1	0.0144759	0.283377	-4.291	0.00051714	0.0346998	down
TRINITY_DN63199_c0_g1	0.0178163	0.350833	-4.29951	6.0911e-05	0.00798858	down
TRINITY_DN73591_c0_g1	0.0677511	1.3379	-4.30358	0.000160015	0.0160468	down
TRINITY_DN68305_c0_g1	0.064567	1.27747	-4.30635	7.67472e-05	0.00940202	down
TRINITY_DN81089_c0_g1	0.20974	4.1543	-4.30793	0.000155254	0.0156593	down
TRINITY_DN64922_c0_g1	0.126953	2.5277	-4.31546	8.27484e-05	0.00990113	down
TRINITY_DN86472_c2_g5	0.0769558	1.53552	-4.31855	0.000754031	0.0442326	down
TRINITY_DN68036_c3_g1	0.0315016	0.628608	-4.31866	3.24388e-05	0.00507783	down
TRINITY_DN96892_c2_g2	1.65931	33.1567	-4.32065	0.000448849	0.0321363	down
TRINITY_DN67457_c1_g1	0.0336897	0.673552	-4.32141	0.000801588	0.0460191	down
TRINITY_DN78445_c0_g1	7.43726	149.414	-4.3284	0.000506477	0.0344274	down
TRINITY_DN94675_c0_g1	0.0287418	0.581962	-4.3397	0.000833546	0.0470638	down
TRINITY_DN70440_c3_g2	0.234338	4.78147	-4.35079	0.000273821	0.0231983	down
TRINITY_DN74799_c0_g3	0.0624128	1.28342	-4.36201	0.000731162	0.0434457	down
TRINITY_DN70834_c1_g5	0.0173667	0.357237	-4.36248	0.000103855	0.0117279	down
TRINITY_DN97364_c3_g2	0.480764	9.93425	-4.36901	3.6275e-06	0.000980963	down
TRINITY_DN66906_c0_g1	0.0261198	0.54105	-4.37255	0.000899709	0.0498964	down
TRINITY_DN78224_c1_g4	0.0399448	0.82875	-4.37486	0.000136108	0.0140362	down
TRINITY_DN79540_c1_g3	0.135625	2.82154	-4.37879	0.00010446	0.0117279	down
TRINITY_DN72401_c1_g1	0.135193	2.81279	-4.37891	1.25989e-06	0.000445176	down
TRINITY_DN67864_c1_g1	0.0367537	0.766	-4.38138	5.68397e-05	0.00757982	down
TRINITY_DN73831_c2_g3	0.0466345	0.976925	-4.38878	0.000375475	0.0284693	down
TRINITY_DN96529_c3_g1	0.0951583	2.00197	-4.39495	7.64419e-05	0.00939096	down
TRINITY_DN65609_c0_g1	0.0140438	0.295841	-4.39682	2.18413e-05	0.00377029	down
TRINITY_DN88686_c1_g7	1.24983	26.329	-4.39685	0.000451075	0.0321363	down
TRINITY_DN89480_c1_g1	0.431295	9.09596	-4.39848	0.00021457	0.0197701	down
TRINITY_DN68865_c2_g1	0.0388971	0.821116	-4.39985	0.000279537	0.0235456	down
TRINITY_DN79818_c2_g2	0.0505789	1.07307	-4.40707	0.000620473	0.039216	down
TRINITY_DN66071_c0_g1	0.0494215	1.04953	-4.40846	0.000347098	0.0269882	down
TRINITY_DN85756_c0_g1	0.102505	2.19064	-4.41759	0.000262319	0.0226187	down
TRINITY_DN62909_c0_g1	0.0167751	0.359486	-4.42154	0.000212847	0.0196944	down
TRINITY_DN68348_c0_g1	0.0259827	0.557128	-4.42238	1.32621e-05	0.00262678	down
TRINITY_DN93532_c0_g3	0.0194622	0.418583	-4.42677	3.10028e-05	0.00492363	down
TRINITY_DN70387_c0_g2	0.0765897	1.64732	-4.42683	0.000152203	0.0154408	down
TRINITY_DN87576_c0_g4	3.5977	77.4574	-4.42826	0.000210472	0.0195923	down
TRINITY_DN68661_c0_g1	0.0606013	1.30629	-4.42998	3.71763e-05	0.00557945	down
TRINITY_DN82208_c0_g2	0.275066	5.98555	-4.44363	6.34569e-05	0.00821151	down
TRINITY_DN73682_c2_g1	0.0359125	0.78349	-4.44736	0.000120976	0.0130779	down
TRINITY_DN58521_c0_g1	0.0113746	0.249284	-4.4539	0.000321979	0.0254976	down
TRINITY_DN48656_c0_g1	0.0134788	0.297463	-4.46395	0.000148206	0.0151054	down
TRINITY_DN75999_c0_g3	0.140276	3.0983	-4.46514	0.000115334	0.0125769	down
TRINITY_DN40508_c0_g1	0.091603	2.03811	-4.47569	0.000379547	0.0287033	down
TRINITY_DN91239_c0_g1	0.433685	9.65771	-4.47696	5.64929e-05	0.00755664	down
TRINITY_DN88356_c3_g2	0.0536437	1.2007	-4.48432	9.34302e-05	0.0108234	down
TRINITY_DN68952_c0_g3	0.0117234	0.262986	-4.48752	0.000383848	0.0289533	down
TRINITY_DN93091_c0_g4	0.162446	3.65793	-4.493	7.15443e-05	0.00887668	down
TRINITY_DN66733_c1_g3	0.0196714	0.445652	-4.50175	0.00036216	0.027822	down
TRINITY_DN64866_c0_g1	0.0274925	0.624824	-4.50634	0.000751491	0.0441132	down
TRINITY_DN89699_c3_g4	0.558936	12.7226	-4.50857	1.75262e-05	0.00320264	down
TRINITY_DN80585_c0_g1	0.0560948	1.2805	-4.5127	5.27328e-07	0.000237425	down
TRINITY_DN96242_c0_g1	0.463361	10.5869	-4.514	9.07313e-05	0.0105951	down
TRINITY_DN74878_c4_g1	0.0482608	1.10523	-4.51735	0.000364542	0.0279804	down
TRINITY_DN68736_c0_g2	0.0771312	1.76884	-4.51935	0.000141619	0.0145359	down
TRINITY_DN86671_c0_g2	0.0834711	1.92447	-4.52704	1.25673e-05	0.00251769	down
TRINITY_DN96271_c1_g1	0.245092	5.65968	-4.52932	0.000460703	0.0324599	down
TRINITY_DN71632_c3_g5	0.057592	1.33239	-4.532	4.34939e-05	0.00630027	down
TRINITY_DN73248_c0_g6	0.021453	0.497225	-4.53465	0.000173589	0.0169793	down
TRINITY_DN87576_c0_g1	2.60728	60.5534	-4.53759	2.49589e-05	0.0041764	down
TRINITY_DN66902_c0_g1	0.0583608	1.36916	-4.55215	0.000108196	0.0120697	down
TRINITY_DN67300_c3_g1	0.256122	6.06605	-4.56585	2.35209e-05	0.00397385	down
TRINITY_DN76594_c3_g1	0.136493	3.23498	-4.56686	1.54947e-05	0.00292947	down
TRINITY_DN77561_c2_g2	0.0765998	1.81849	-4.56925	0.000313125	0.0249944	down
TRINITY_DN59525_c0_g1	0.0156996	0.372842	-4.56977	0.000591903	0.0379244	down
TRINITY_DN97698_c3_g1	0.442992	10.5327	-4.57145	0.000455049	0.0322569	down
TRINITY_DN64893_c0_g1	0.0141255	0.336022	-4.57218	0.000292046	0.0241109	down
TRINITY_DN65060_c0_g1	0.0756961	1.80431	-4.57508	9.69474e-05	0.0110839	down
TRINITY_DN68684_c1_g2	0.104017	2.48206	-4.57665	1.01058e-05	0.00215821	down
TRINITY_DN80967_c2_g1	0.0399581	0.95442	-4.57806	1.17744e-05	0.00239735	down
TRINITY_DN65723_c0_g1	0.0121651	0.290831	-4.57936	0.000424104	0.0310253	down
TRINITY_DN86639_c0_g1	0.235068	5.62544	-4.58081	5.21942e-05	0.00722009	down
TRINITY_DN68176_c2_g1	0.0247551	0.592645	-4.58137	4.22597e-05	0.00614186	down
TRINITY_DN68006_c0_g1	0.0492488	1.18137	-4.58423	0.000192662	0.0182719	down
TRINITY_DN93404_c1_g2	0.0386807	0.939384	-4.60203	6.5945e-05	0.00841022	down
TRINITY_DN83569_c3_g3	0.0435615	1.06301	-4.60897	2.76942e-07	0.00014064	down
TRINITY_DN88175_c0_g6	0.384924	9.41817	-4.6128	0.000450725	0.0321363	down
TRINITY_DN65337_c0_g6	0.0135912	0.333226	-4.61576	0.000636525	0.0399128	down
TRINITY_DN79477_c0_g2	1.00543	24.6524	-4.61585	0.000148818	0.0151502	down
TRINITY_DN20188_c0_g1	0.0100226	0.246072	-4.61775	0.000731664	0.0434457	down
TRINITY_DN62775_c0_g1	0.111556	2.74683	-4.62193	0.000445367	0.0320367	down
TRINITY_DN66875_c1_g5	0.00936818	0.230932	-4.62356	0.000356244	0.0274641	down
TRINITY_DN67864_c0_g2	0.0116824	0.288053	-4.62393	0.000220993	0.0201074	down
TRINITY_DN23790_c0_g1	0.0177975	0.440797	-4.63037	0.000826957	0.0468736	down
TRINITY_DN59113_c0_g1	0.0124914	0.309555	-4.63119	0.000445403	0.0320367	down
TRINITY_DN69940_c1_g1	0.101656	2.54238	-4.64442	3.67305e-05	0.00555069	down
TRINITY_DN70362_c2_g5	0.111495	2.80185	-4.65133	0.000600495	0.0383137	down
TRINITY_DN67252_c0_g2	0.011772	0.296781	-4.65597	3.13568e-05	0.00495907	down
TRINITY_DN82421_c0_g2	0.43924	11.1193	-4.66191	7.9708e-05	0.00961637	down
TRINITY_DN66637_c1_g3	0.096115	2.44121	-4.66669	2.56877e-05	0.00425758	down
TRINITY_DN80915_c1_g3	0.0487937	1.24292	-4.6709	1.6233e-05	0.00301681	down
TRINITY_DN87576_c0_g2	9.94537	254.497	-4.67748	7.86445e-05	0.00955405	down
TRINITY_DN85471_c0_g2	0.0953679	2.44465	-4.67998	3.12305e-05	0.0049508	down
TRINITY_DN88669_c0_g1	0.033621	0.86255	-4.68117	0.000175162	0.0170948	down
TRINITY_DN87714_c0_g2	0.0315274	0.809119	-4.68167	0.000144216	0.0147332	down
TRINITY_DN75241_c1_g1	0.0321586	0.829794	-4.68948	0.000759346	0.044425	down
TRINITY_DN61251_c0_g1	0.0098628	0.255426	-4.69476	0.000757793	0.0443936	down
TRINITY_DN94115_c0_g1	0.392705	10.1803	-4.6962	0.000231924	0.020756	down
TRINITY_DN69451_c1_g2	0.03383	0.880573	-4.70207	0.000302078	0.0244957	down
TRINITY_DN87055_c0_g1	0.0957269	2.49258	-4.70257	1.40626e-08	1.14797e-05	down
TRINITY_DN96943_c1_g2	0.387766	10.1281	-4.70704	2.5472e-05	0.00423791	down
TRINITY_DN64246_c2_g3	0.0126003	0.330018	-4.71101	0.000636488	0.0399128	down
TRINITY_DN52181_c0_g1	0.0240828	0.6321	-4.71408	5.55934e-05	0.00749006	down
TRINITY_DN98974_c1_g1	0.0366372	0.966334	-4.72114	7.52985e-05	0.00926352	down
TRINITY_DN82339_c1_g2	0.279754	7.4453	-4.7341	0.000182272	0.0175147	down
TRINITY_DN66847_c1_g1	0.0128647	0.343842	-4.74025	0.000612373	0.0388445	down
TRINITY_DN58456_c0_g1	0.0110732	0.296231	-4.74157	0.000439173	0.0318344	down
TRINITY_DN179541_c0_g1	0.00615373	0.165329	-4.74773	0.000239626	0.0211634	down
TRINITY_DN67412_c0_g7	0.0368478	0.99019	-4.74805	0.000171583	0.0168586	down
TRINITY_DN94414_c0_g2	1.45021	39.3622	-4.76247	0.000688859	0.0419009	down
TRINITY_DN62395_c0_g1	0.00993345	0.269695	-4.76289	0.000148046	0.0151054	down
TRINITY_DN96831_c1_g2	0.817354	22.2192	-4.7647	5.36743e-05	0.00733692	down
TRINITY_DN65473_c1_g3	0.0109965	0.299191	-4.76595	9.39675e-05	0.0108425	down
TRINITY_DN92913_c0_g1	0.0246315	0.670267	-4.76616	1.13994e-05	0.00234283	down
TRINITY_DN75856_c0_g1	0.0240597	0.657023	-4.77125	7.52566e-05	0.00926352	down
TRINITY_DN68899_c1_g1	0.0342339	0.93863	-4.77706	1.06187e-05	0.00222424	down
TRINITY_DN68952_c0_g1	0.0233082	0.640246	-4.77972	7.0834e-05	0.00881358	down
TRINITY_DN90139_c2_g2	0.0401019	1.10715	-4.78704	0.000516753	0.0346998	down
TRINITY_DN68528_c0_g1	0.0613428	1.69975	-4.79229	0.000730531	0.0434457	down
TRINITY_DN72244_c1_g1	0.106112	2.96659	-4.80515	0.000500506	0.0342864	down
TRINITY_DN87353_c1_g4	0.0587148	1.64233	-4.80587	0.000535501	0.0355429	down
TRINITY_DN75196_c3_g5	0.120813	3.39264	-4.81157	8.79757e-06	0.00192592	down
TRINITY_DN57217_c0_g1	0.0111892	0.315589	-4.81787	0.000171547	0.0168586	down
TRINITY_DN57203_c0_g2	0.0117213	0.330725	-4.81843	0.00067024	0.0412157	down
TRINITY_DN72311_c0_g1	0.0158865	0.45133	-4.82831	0.000237667	0.0210543	down
TRINITY_DN68750_c0_g2	0.0165259	0.471036	-4.83304	2.839e-05	0.00461784	down
TRINITY_DN57061_c1_g1	0.0305377	0.871808	-4.83535	0.000743578	0.0439143	down
TRINITY_DN86045_c0_g5	0.0778204	2.2252	-4.83764	1.17483e-05	0.00239735	down
TRINITY_DN96075_c1_g1	0.26726	7.71248	-4.85088	2.52332e-05	0.00421423	down
TRINITY_DN83089_c2_g4	0.0318709	0.91985	-4.85109	7.54427e-07	0.000306498	down
TRINITY_DN83818_c2_g1	0.0277319	0.800429	-4.85115	1.88365e-05	0.00339239	down
TRINITY_DN82948_c0_g1	0.116619	3.38523	-4.85938	2.12723e-05	0.00368665	down
TRINITY_DN69427_c0_g2	0.33482	9.73802	-4.86217	0.000622548	0.0392954	down
TRINITY_DN81876_c0_g1	0.0675341	1.96419	-4.86217	1.44091e-05	0.00276614	down
TRINITY_DN63826_c0_g1	0.0087321	0.254594	-4.86573	1.91298e-05	0.00343808	down
TRINITY_DN77641_c1_g1	0.464381	13.5703	-4.869	0.000302589	0.0244957	down
TRINITY_DN71376_c0_g1	0.159542	4.68781	-4.87691	0.000739487	0.0437615	down
TRINITY_DN72459_c0_g3	1.04586	30.8665	-4.88328	0.000413138	0.0305558	down
TRINITY_DN71857_c0_g5	0.0246214	0.729021	-4.88798	7.73201e-05	0.00944571	down
TRINITY_DN89525_c3_g4	0.0576422	1.71474	-4.89472	0.000170471	0.016787	down
TRINITY_DN88181_c1_g7	0.0419267	1.2513	-4.89941	1.92315e-05	0.00343808	down
TRINITY_DN63341_c0_g1	0.0198641	0.594808	-4.90419	0.000257208	0.022288	down
TRINITY_DN67346_c2_g1	0.0169408	0.508279	-4.90704	5.5271e-07	0.000241854	down
TRINITY_DN60736_c0_g1	0.0207248	0.622662	-4.90902	0.000264122	0.0227119	down
TRINITY_DN96962_c0_g1	0.108626	3.26581	-4.91	0.000856817	0.0479439	down
TRINITY_DN71513_c0_g5	0.0808969	2.45097	-4.92113	0.000186369	0.0178105	down
TRINITY_DN65585_c0_g2	0.153062	4.6477	-4.92433	0.000502697	0.0343577	down
TRINITY_DN91129_c0_g2	0.0899438	2.73341	-4.92553	0.000700149	0.0421761	down
TRINITY_DN85191_c0_g1	0.102203	3.11404	-4.92928	0.000524628	0.0350341	down
TRINITY_DN67730_c0_g1	0.0196432	0.600118	-4.93315	0.000367729	0.0280053	down
TRINITY_DN178418_c0_g1	0.00905065	0.276516	-4.9332	0.000369847	0.0281403	down
TRINITY_DN69187_c1_g7	0.0175304	0.535763	-4.93366	0.000678365	0.0414358	down
TRINITY_DN67845_c0_g1	0.011889	0.365973	-4.94404	0.000795056	0.0457784	down
TRINITY_DN92913_c0_g3	0.0508062	1.56766	-4.94747	3.05504e-05	0.00486949	down
TRINITY_DN67490_c2_g1	0.0124484	0.385141	-4.95135	0.000575869	0.0373592	down
TRINITY_DN69779_c1_g2	0.193548	6.00674	-4.95582	1.21384e-06	0.000434531	down
TRINITY_DN67992_c0_g1	0.0126666	0.3936	-4.95762	5.05706e-06	0.00127664	down
TRINITY_DN83818_c2_g2	0.0178536	0.555924	-4.9606	0.000649021	0.0403548	down
TRINITY_DN96149_c1_g2	0.0338036	1.05296	-4.96114	4.44406e-05	0.00637398	down
TRINITY_DN87847_c2_g1	0.112539	3.51007	-4.963	0.000449897	0.0321363	down
TRINITY_DN68258_c0_g1	0.109216	3.40939	-4.96426	0.000200201	0.0189253	down
TRINITY_DN29485_c0_g1	0.00750935	0.234469	-4.96456	0.00043048	0.0313866	down
TRINITY_DN96292_c1_g2	0.225047	7.04751	-4.96882	2.46229e-05	0.0041501	down
TRINITY_DN70658_c4_g1	0.0477739	1.49734	-4.97004	1.78582e-06	0.000559089	down
TRINITY_DN61676_c0_g1	0.0162568	0.510746	-4.97349	0.000120271	0.0130304	down
TRINITY_DN76448_c1_g4	0.193618	6.0936	-4.97601	0.00012223	0.0131483	down
TRINITY_DN79170_c2_g1	0.0181477	0.571749	-4.97753	0.00015512	0.0156593	down
TRINITY_DN66588_c1_g1	0.0085287	0.268855	-4.97836	0.000412361	0.0305387	down
TRINITY_DN70788_c1_g2	0.092688	2.92375	-4.9793	5.46155e-06	0.00135142	down
TRINITY_DN65166_c0_g1	0.0121079	0.383152	-4.98389	4.95645e-05	0.00697151	down
TRINITY_DN66404_c0_g1	0.0277272	0.883314	-4.99355	0.000680438	0.0415334	down
TRINITY_DN72556_c3_g2	0.0230582	0.735687	-4.99574	1.43991e-05	0.00276614	down
TRINITY_DN96942_c0_g1	0.0127878	0.409282	-5.00026	0.000310444	0.0249002	down
TRINITY_DN97364_c3_g4	0.0946738	3.03214	-5.00123	0.000220684	0.0201074	down
TRINITY_DN79209_c0_g2	0.0196282	0.632491	-5.01004	1.81963e-06	0.000565619	down
TRINITY_DN64656_c0_g1	0.0104528	0.338334	-5.01649	0.000281372	0.0236234	down
TRINITY_DN87867_c1_g3	0.0222101	0.724326	-5.02735	9.0743e-06	0.00197659	down
TRINITY_DN97562_c3_g1	0.158369	5.21234	-5.04057	0.00029619	0.024338	down
TRINITY_DN70332_c2_g6	0.0854132	2.81278	-5.04139	4.51236e-05	0.00641924	down
TRINITY_DN96949_c1_g4	0.214258	7.17263	-5.06508	3.73488e-05	0.0055941	down
TRINITY_DN71481_c0_g2	0.114533	3.83974	-5.06717	6.92857e-05	0.00868278	down
TRINITY_DN77097_c1_g1	0.0201443	0.676679	-5.07003	1.03463e-06	0.000399877	down
TRINITY_DN77722_c2_g4	0.00838353	0.282011	-5.07205	0.000515354	0.0346905	down
TRINITY_DN66793_c0_g1	0.00865732	0.291584	-5.07385	4.09608e-05	0.00598294	down
TRINITY_DN71214_c5_g1	0.00941037	0.3178	-5.07772	0.000303542	0.0245319	down
TRINITY_DN73717_c1_g2	0.485858	16.5202	-5.08755	6.53072e-07	0.000271637	down
TRINITY_DN65504_c2_g3	0.0115523	0.393333	-5.0895	0.000285541	0.0237358	down
TRINITY_DN74266_c1_g3	0.0340956	1.16214	-5.09105	0.000234353	0.0208398	down
TRINITY_DN71513_c0_g1	0.0244888	0.836866	-5.0948	0.000250638	0.0218925	down
TRINITY_DN74951_c1_g1	0.812462	27.8382	-5.09862	0.000527487	0.0351445	down
TRINITY_DN66008_c2_g1	0.0166878	0.578081	-5.1144	0.000268487	0.0228864	down
TRINITY_DN78507_c1_g5	0.0174031	0.60472	-5.11885	0.000104267	0.0117279	down
TRINITY_DN74281_c1_g1	0.569112	19.8253	-5.12248	0.000331845	0.0261367	down
TRINITY_DN94740_c0_g1	0.0521568	1.8187	-5.12391	1.97944e-05	0.00351419	down
TRINITY_DN87548_c0_g1	0.0136204	0.475323	-5.12507	5.2695e-05	0.00723702	down
TRINITY_DN77509_c0_g3	0.0870704	3.04515	-5.12819	0.000450785	0.0321363	down
TRINITY_DN70509_c2_g1	0.0334132	1.17771	-5.13942	0.000722681	0.043147	down
TRINITY_DN69164_c0_g1	0.017103	0.60422	-5.14275	0.000153531	0.0155393	down
TRINITY_DN68778_c1_g1	0.680774	24.0839	-5.14475	1.11637e-06	0.000420308	down
TRINITY_DN78695_c0_g3	0.0376968	1.34179	-5.15357	0.000890442	0.0495082	down
TRINITY_DN62470_c0_g2	0.00683158	0.244274	-5.16014	0.000109881	0.0121717	down
TRINITY_DN72144_c2_g1	0.0990888	3.56376	-5.16853	0.000103834	0.0117279	down
TRINITY_DN66614_c0_g1	0.00668268	0.241935	-5.17805	0.000548794	0.0361232	down
TRINITY_DN67586_c2_g1	0.0197643	0.725897	-5.19879	0.000129071	0.0135341	down
TRINITY_DN75517_c3_g2	0.026981	0.991895	-5.20017	0.000635159	0.0398844	down
TRINITY_DN70332_c2_g9	0.149185	5.53789	-5.21416	0.000267216	0.0228551	down
TRINITY_DN98668_c2_g3	0.383477	14.2789	-5.2186	2.08211e-05	0.00365194	down
TRINITY_DN68017_c0_g1	0.00897137	0.334687	-5.22134	6.92551e-06	0.00163492	down
TRINITY_DN67468_c1_g4	0.661803	24.7378	-5.22417	0.000215834	0.0198254	down
TRINITY_DN68993_c2_g2	0.0441175	1.65035	-5.22527	0.000352215	0.0272256	down
TRINITY_DN67331_c0_g1	0.0199877	0.748436	-5.22669	5.64271e-05	0.00755664	down
TRINITY_DN59862_c0_g1	0.00899502	0.33714	-5.22808	0.000184742	0.0177131	down
TRINITY_DN93067_c0_g2	0.212193	7.98007	-5.23295	0.000460809	0.0324599	down
TRINITY_DN63586_c0_g1	0.0901647	3.40393	-5.23849	0.0005643	0.0368661	down
TRINITY_DN66730_c0_g1	0.0082964	0.31467	-5.24521	0.000457648	0.0323416	down
TRINITY_DN70720_c1_g2	0.00904575	0.344406	-5.25073	3.21714e-06	0.000897786	down
TRINITY_DN70488_c0_g1	0.0137878	0.525719	-5.25283	0.000122977	0.0132124	down
TRINITY_DN69270_c0_g2	0.0124248	0.474661	-5.2556	0.000275879	0.0233049	down
TRINITY_DN99802_c0_g1	0.00828948	0.316776	-5.25604	0.000640204	0.0401029	down
TRINITY_DN91911_c1_g5	0.0485528	1.86057	-5.26004	0.000124936	0.0133245	down
TRINITY_DN86758_c2_g3	0.0190837	0.732343	-5.2621	1.84757e-05	0.00336208	down
TRINITY_DN69922_c1_g2	0.0387396	1.48839	-5.2638	0.000533369	0.0354283	down
TRINITY_DN62873_c0_g1	0.0165579	0.638924	-5.27005	0.000310352	0.0249002	down
TRINITY_DN75898_c1_g3	0.035304	1.36257	-5.27036	0.000459048	0.0323881	down
TRINITY_DN69482_c2_g3	0.0170003	0.656329	-5.27078	3.53307e-05	0.00544274	down
TRINITY_DN76170_c3_g1	0.0890898	3.44905	-5.2748	2.57696e-11	2.77888e-08	down
TRINITY_DN26607_c0_g1	0.00465355	0.180852	-5.28033	0.000312037	0.0249771	down
TRINITY_DN68306_c2_g5	0.0304633	1.18393	-5.28037	0.000316728	0.0251503	down
TRINITY_DN66494_c0_g1	0.0096536	0.37523	-5.28056	0.000226325	0.0204224	down
TRINITY_DN63820_c0_g1	0.0143745	0.560021	-5.2839	7.75528e-05	0.0094609	down
TRINITY_DN55277_c0_g2	0.00487408	0.190332	-5.28724	0.000560794	0.0366644	down
TRINITY_DN54839_c0_g1	0.0204797	0.806415	-5.29926	0.000299401	0.0244181	down
TRINITY_DN62172_c0_g1	0.00479627	0.189205	-5.30189	0.000308854	0.0248709	down
TRINITY_DN68196_c6_g1	0.015812	0.624823	-5.30436	6.99396e-05	0.00875216	down
TRINITY_DN66022_c0_g1	0.0052011	0.205923	-5.30714	0.000578935	0.0374302	down
TRINITY_DN73295_c1_g5	0.00733205	0.29093	-5.31031	0.000517438	0.0346998	down
TRINITY_DN70275_c2_g1	0.018828	0.747326	-5.31078	1.72712e-05	0.00318268	down
TRINITY_DN66484_c1_g1	0.0076751	0.30658	-5.31993	0.000559821	0.0366644	down
TRINITY_DN66272_c0_g1	0.00862135	0.34463	-5.32099	0.000226322	0.0204224	down
TRINITY_DN77845_c0_g1	0.0260071	1.03994	-5.32145	1.61662e-07	9.16928e-05	down
TRINITY_DN48981_c0_g1	0.00548605	0.220832	-5.33104	0.000265922	0.022772	down
TRINITY_DN73260_c1_g4	0.145612	5.88123	-5.33591	1.72308e-08	1.36823e-05	down
TRINITY_DN65205_c0_g3	0.0118836	0.480047	-5.33613	0.000230069	0.0206961	down
TRINITY_DN67345_c0_g1	0.0176691	0.714691	-5.33802	1.13547e-05	0.00233915	down
TRINITY_DN65742_c0_g1	0.0184992	0.748885	-5.33921	0.00070016	0.0421761	down
TRINITY_DN64643_c1_g2	0.0158238	0.640582	-5.33922	0.000248125	0.0217382	down
TRINITY_DN92376_c1_g6	0.0352707	1.43374	-5.34517	0.000687524	0.0418781	down
TRINITY_DN65877_c0_g1	0.0739248	3.0222	-5.3534	5.78135e-05	0.00766287	down
TRINITY_DN60839_c0_g1	0.0121	0.496128	-5.35763	0.00031226	0.0249771	down
TRINITY_DN84822_c1_g4	0.0175553	0.719979	-5.35797	0.000173859	0.0169866	down
TRINITY_DN73505_c0_g3	0.0427213	1.76005	-5.36451	1.30849e-05	0.00259756	down
TRINITY_DN79722_c0_g2	0.0102617	0.423334	-5.36646	0.000233283	0.0208189	down
TRINITY_DN43551_c0_g1	0.00978283	0.406137	-5.37557	0.000124647	0.0133099	down
TRINITY_DN23734_c0_g1	0.00799328	0.333586	-5.38313	0.00070372	0.0423041	down
TRINITY_DN73959_c0_g1	0.0138121	0.576864	-5.38423	0.000768081	0.0447317	down
TRINITY_DN65614_c0_g1	0.0119138	0.498915	-5.38809	0.000699222	0.0421761	down
TRINITY_DN80629_c1_g1	0.0452043	1.89446	-5.38918	0.00024014	0.021178	down
TRINITY_DN50490_c0_g1	0.0054187	0.227136	-5.38947	0.000291473	0.0240863	down
TRINITY_DN77693_c2_g1	0.0297208	1.24668	-5.39047	6.83478e-05	0.00862713	down
TRINITY_DN72165_c1_g2	0.00835858	0.354624	-5.40689	8.1255e-05	0.00977356	down
TRINITY_DN57715_c0_g1	0.00425317	0.180464	-5.40703	7.84451e-05	0.0095431	down
TRINITY_DN64663_c0_g1	0.0076947	0.328206	-5.41459	0.000675595	0.0413533	down
TRINITY_DN83042_c0_g1	0.0215198	0.919987	-5.41787	2.23367e-06	0.000679807	down
TRINITY_DN97446_c3_g2	0.111546	4.77178	-5.41882	0.000398109	0.0296957	down
TRINITY_DN66306_c0_g1	0.0189189	0.810839	-5.42151	0.000285667	0.0237358	down
TRINITY_DN64584_c0_g3	0.0135584	0.585382	-5.43212	0.000272844	0.0231604	down
TRINITY_DN69386_c2_g3	0.0198329	0.860526	-5.43925	6.64816e-05	0.00845265	down
TRINITY_DN66663_c1_g1	0.075356	3.29257	-5.44935	0.000411032	0.0305065	down
TRINITY_DN70069_c0_g1	0.0202834	0.889791	-5.45509	0.000220618	0.0201074	down
TRINITY_DN75112_c2_g1	0.0687594	3.02313	-5.45834	0.0003183	0.0252292	down
TRINITY_DN92978_c0_g2	0.0421513	1.86724	-5.46918	0.000899204	0.0498964	down
TRINITY_DN55952_c0_g1	0.00390095	0.17333	-5.47355	0.000833239	0.0470638	down
TRINITY_DN73617_c0_g3	0.0214832	0.954842	-5.47398	0.000866904	0.0483534	down
TRINITY_DN97608_c2_g1	0.023912	1.06662	-5.47918	0.00020226	0.0190963	down
TRINITY_DN77837_c0_g3	0.0297542	1.32953	-5.48168	1.24176e-07	7.42907e-05	down
TRINITY_DN70834_c1_g8	0.0155852	0.696672	-5.48223	5.0946e-07	0.000230569	down
TRINITY_DN66585_c0_g1	0.00557929	0.250083	-5.48618	0.000231399	0.0207515	down
TRINITY_DN89078_c0_g2	0.0202711	0.910642	-5.48938	0.000357172	0.0275114	down
TRINITY_DN67074_c3_g1	0.011167	0.504334	-5.49706	0.000155725	0.0156887	down
TRINITY_DN70796_c4_g1	0.013611	0.615181	-5.49817	5.0192e-05	0.00701345	down
TRINITY_DN65600_c0_g2	0.00972652	0.440617	-5.50146	0.000178482	0.0173222	down
TRINITY_DN81160_c3_g4	0.0356298	1.62355	-5.50992	0.000298611	0.0243955	down
TRINITY_DN49589_c0_g2	0.00560113	0.255252	-5.51006	0.000142033	0.0145612	down
TRINITY_DN67462_c2_g2	0.00691845	0.317364	-5.51954	0.000110303	0.0121957	down
TRINITY_DN68394_c6_g4	0.0104762	0.481209	-5.52147	0.000300054	0.0244485	down
TRINITY_DN79704_c0_g2	0.0159179	0.733248	-5.52558	2.06197e-05	0.0036363	down
TRINITY_DN66582_c1_g1	0.00812843	0.375971	-5.5315	0.000519463	0.034769	down
TRINITY_DN91858_c1_g2	0.126527	5.86564	-5.53477	2.89275e-05	0.00466191	down
TRINITY_DN82181_c1_g1	0.123859	5.74308	-5.53506	2.23706e-05	0.00383891	down
TRINITY_DN67518_c1_g4	0.0141505	0.656306	-5.53544	6.53602e-05	0.00837843	down
TRINITY_DN94521_c0_g1	0.338233	15.7268	-5.53906	8.83764e-05	0.0104316	down
TRINITY_DN79864_c0_g1	0.128251	5.9696	-5.54059	0.000133267	0.0138306	down
TRINITY_DN91889_c7_g3	0.18279	8.51764	-5.54219	1.87391e-05	0.00338503	down
TRINITY_DN70713_c1_g3	0.0655143	3.07332	-5.55184	0.000503321	0.034359	down
TRINITY_DN77039_c0_g1	0.0108445	0.50974	-5.55473	5.15447e-06	0.00129482	down
TRINITY_DN72977_c0_g1	0.0187805	0.887612	-5.56262	6.34294e-06	0.00151791	down
TRINITY_DN66887_c0_g2	0.0171132	0.809185	-5.56329	6.17885e-05	0.00809151	down
TRINITY_DN73696_c0_g1	0.00960568	0.456778	-5.57146	5.06437e-07	0.000230395	down
TRINITY_DN69366_c2_g1	0.0189606	0.902657	-5.5731	0.000675029	0.0413533	down
TRINITY_DN68177_c0_g1	0.00602167	0.290399	-5.59173	3.70234e-05	0.00557201	down
TRINITY_DN977_c0_g1	0.004564	0.220522	-5.59448	0.000304075	0.0245471	down
TRINITY_DN67569_c0_g1	0.0064757	0.313621	-5.59784	9.69476e-06	0.00208061	down
TRINITY_DN64579_c0_g1	0.0586433	2.86279	-5.60931	0.000121737	0.0131343	down
TRINITY_DN63814_c0_g1	0.00974197	0.481061	-5.62586	0.00065919	0.040749	down
TRINITY_DN70712_c0_g1	0.0111503	0.553747	-5.63408	0.000179629	0.0173947	down
TRINITY_DN76450_c0_g6	0.00867068	0.431157	-5.63592	4.18943e-05	0.0060989	down
TRINITY_DN68088_c0_g1	0.0142176	0.708313	-5.63864	3.26788e-05	0.00509713	down
TRINITY_DN68274_c0_g1	0.0146812	0.73512	-5.64594	8.23623e-06	0.00185894	down
TRINITY_DN63037_c0_g1	0.00542415	0.271837	-5.6472	0.000416606	0.0306824	down
TRINITY_DN69200_c0_g2	0.0355533	1.786	-5.6506	4.97549e-08	3.59169e-05	down
TRINITY_DN70736_c0_g1	0.029203	1.47347	-5.65696	4.89971e-07	0.000224071	down
TRINITY_DN69366_c2_g7	0.0188556	0.952158	-5.65814	0.000329921	0.0260087	down
TRINITY_DN63933_c0_g1	0.00858267	0.43563	-5.66553	4.43822e-05	0.00637398	down
TRINITY_DN76104_c2_g1	0.0135288	0.687587	-5.66744	4.08461e-07	0.000193901	down
TRINITY_DN65116_c0_g1	0.00693318	0.353722	-5.67296	0.000503699	0.034359	down
TRINITY_DN79090_c2_g2	0.0252302	1.29638	-5.68319	7.94527e-06	0.0018104	down
TRINITY_DN60253_c0_g1	0.0187457	0.967685	-5.68991	8.68487e-05	0.010307	down
TRINITY_DN64389_c0_g1	0.0111681	0.578748	-5.69549	0.000812484	0.0463843	down
TRINITY_DN74235_c0_g1	0.0156176	0.810453	-5.69748	7.53637e-07	0.000306498	down
TRINITY_DN67976_c0_g3	0.0289731	1.50649	-5.70033	1.44328e-06	0.000492209	down
TRINITY_DN66192_c0_g1	0.0118944	0.620017	-5.70395	5.61875e-05	0.00753888	down
TRINITY_DN67300_c4_g1	0.0968766	5.05939	-5.70667	3.32824e-05	0.00516362	down
TRINITY_DN81561_c1_g1	0.491916	25.8955	-5.71814	1.23884e-05	0.0024933	down
TRINITY_DN65745_c0_g1	0.00538767	0.284953	-5.72492	0.000207119	0.0193904	down
TRINITY_DN68034_c0_g2	0.0123304	0.652686	-5.72609	4.46717e-05	0.00638615	down
TRINITY_DN62132_c0_g1	0.00872217	0.462556	-5.7288	0.000607831	0.0386406	down
TRINITY_DN77574_c0_g2	0.0128626	0.68838	-5.74194	0.000480962	0.0333417	down
TRINITY_DN66660_c0_g3	0.0101964	0.549805	-5.75278	0.000203122	0.0191085	down
TRINITY_DN75999_c0_g6	0.276668	14.9367	-5.75456	0.000512742	0.0346439	down
TRINITY_DN77722_c2_g1	0.0172755	0.933454	-5.75578	1.3925e-07	8.10873e-05	down
TRINITY_DN64622_c0_g1	0.00846113	0.458812	-5.76091	0.000623748	0.0392954	down
TRINITY_DN97992_c2_g1	0.170533	9.26528	-5.76371	3.5546e-06	0.000970262	down
TRINITY_DN85395_c1_g2	0.00747432	0.407534	-5.76883	4.5047e-05	0.00641924	down
TRINITY_DN93130_c1_g2	0.0385759	2.11365	-5.77589	1.06788e-09	1.05996e-06	down
TRINITY_DN80915_c1_g1	0.0155416	0.856244	-5.78382	2.08063e-07	0.000110815	down
TRINITY_DN68910_c0_g1	0.0116524	0.647997	-5.79729	3.37243e-06	0.000935149	down
TRINITY_DN64358_c0_g1	0.0112526	0.62673	-5.79951	0.000194411	0.0184178	down
TRINITY_DN74646_c5_g1	0.0271683	1.51821	-5.8043	0.000247234	0.0216818	down
TRINITY_DN78644_c3_g3	0.0466845	2.61097	-5.8055	0.000826758	0.0468736	down
TRINITY_DN84822_c1_g2	0.0260474	1.4611	-5.80978	0.00039262	0.0294623	down
TRINITY_DN64900_c0_g1	0.00650058	0.365039	-5.81134	0.000297444	0.0243656	down
TRINITY_DN69403_c0_g1	0.0213853	1.20575	-5.81717	5.93461e-05	0.00781856	down
TRINITY_DN73699_c1_g1	0.226906	12.7949	-5.81734	0.000394397	0.0295703	down
TRINITY_DN68603_c0_g1	0.0192905	1.09342	-5.82482	0.000805052	0.0461107	down
TRINITY_DN95239_c2_g1	0.0200998	1.14127	-5.82731	8.7957e-05	0.0104103	down
TRINITY_DN65904_c0_g1	0.00631415	0.359644	-5.83184	0.000436847	0.0316921	down
TRINITY_DN74655_c3_g2	0.0349059	1.99452	-5.83642	1.92633e-06	0.000596663	down
TRINITY_DN83361_c1_g1	0.0192734	1.10181	-5.83712	0.000164797	0.0164321	down
TRINITY_DN61348_c0_g1	0.00897213	0.513187	-5.83789	0.000377595	0.0286052	down
TRINITY_DN90749_c0_g1	0.0339887	1.94644	-5.83964	1.05791e-09	1.05996e-06	down
TRINITY_DN78001_c0_g2	0.0134934	0.774669	-5.84326	0.000601337	0.0383394	down
TRINITY_DN65952_c0_g1	0.00691228	0.398051	-5.84765	3.13695e-06	0.000883881	down
TRINITY_DN66771_c0_g1	0.0051633	0.298156	-5.85163	0.000191015	0.0181551	down
TRINITY_DN52231_c0_g1	0.00624045	0.360943	-5.85398	0.000173578	0.0169793	down
TRINITY_DN58914_c0_g1	0.0118627	0.687327	-5.8565	8.49572e-05	0.0101238	down
TRINITY_DN97868_c2_g9	0.0761123	4.41428	-5.8579	0.000215808	0.0198254	down
TRINITY_DN69021_c2_g1	0.00624855	0.362941	-5.86007	2.31925e-05	0.00394892	down
TRINITY_DN70055_c1_g2	0.00965643	0.562261	-5.86361	3.80733e-05	0.00565576	down
TRINITY_DN70619_c0_g1	0.0206546	1.20558	-5.86712	1.9659e-05	0.00349726	down
TRINITY_DN66305_c0_g2	0.0251172	1.47061	-5.8716	9.60393e-05	0.0110524	down
TRINITY_DN94926_c2_g2	0.0405885	2.38412	-5.87624	0.000477568	0.0332119	down
TRINITY_DN90116_c3_g2	0.0196549	1.17855	-5.90598	0.000421478	0.0309605	down
TRINITY_DN89525_c3_g3	0.0279403	1.68238	-5.91202	1.44217e-07	8.34234e-05	down
TRINITY_DN75723_c0_g1	0.0191331	1.15387	-5.91427	7.69367e-06	0.00176847	down
TRINITY_DN83796_c0_g3	0.0311832	1.88781	-5.9198	3.52625e-07	0.00017017	down
TRINITY_DN70435_c2_g3	0.0252008	1.52596	-5.92011	0.000770438	0.04478	down
TRINITY_DN81877_c2_g1	0.311726	19.067	-5.93466	0.000848957	0.0475956	down
TRINITY_DN68637_c0_g1	0.0712554	4.36071	-5.93542	5.43463e-07	0.000240964	down
TRINITY_DN67432_c1_g2	0.00559398	0.343267	-5.93931	1.677e-05	0.00310341	down
TRINITY_DN66612_c0_g1	0.00722732	0.444307	-5.94195	2.98999e-05	0.00480532	down
TRINITY_DN97717_c2_g1	7.3183	450.215	-5.94296	1.03774e-05	0.00220009	down
TRINITY_DN69166_c0_g1	0.149304	9.19489	-5.94451	1.53589e-06	0.000508166	down
TRINITY_DN70300_c0_g3	0.0551765	3.40438	-5.94719	8.9724e-05	0.0105338	down
TRINITY_DN79878_c2_g2	0.0451566	2.80885	-5.9589	1.41574e-05	0.00275414	down
TRINITY_DN66974_c0_g1	0.0112203	0.704081	-5.97156	6.76984e-05	0.00856993	down
TRINITY_DN64235_c0_g2	0.00538498	0.338265	-5.97307	9.39568e-05	0.0108425	down
TRINITY_DN50983_c0_g1	0.00392965	0.249027	-5.98576	0.000500869	0.0342864	down
TRINITY_DN69633_c5_g4	0.247593	15.7172	-5.98823	0.000499602	0.0342864	down
TRINITY_DN67586_c2_g2	0.00866712	0.550344	-5.98864	1.11649e-05	0.00230858	down
TRINITY_DN95504_c2_g5	0.0134448	0.853837	-5.98884	0.000169249	0.0167422	down
TRINITY_DN84798_c4_g1	0.0155786	0.993789	-5.9953	7.8739e-06	0.00180515	down
TRINITY_DN85207_c2_g5	0.0612878	3.91318	-5.9966	1.04911e-05	0.00221199	down
TRINITY_DN78953_c3_g4	0.0300845	1.92499	-5.99969	5.11013e-05	0.00710756	down
TRINITY_DN79388_c0_g3	0.00770462	0.494277	-6.00345	8.27258e-05	0.00990113	down
TRINITY_DN78206_c2_g2	0.371063	23.8968	-6.00901	0.00060668	0.0385956	down
TRINITY_DN69914_c0_g1	0.0176388	1.13832	-6.01201	0.000169698	0.0167487	down
TRINITY_DN71165_c3_g4	0.00800923	0.517715	-6.01435	0.000839819	0.0472652	down
TRINITY_DN71658_c2_g2	0.003605	0.233167	-6.01522	1.47694e-05	0.00281277	down
TRINITY_DN79244_c0_g1	0.0101291	0.65598	-6.01708	2.67095e-06	0.000777665	down
TRINITY_DN56266_c0_g2	0.00447893	0.292457	-6.02893	6.25302e-05	0.0081708	down
TRINITY_DN61971_c0_g1	0.00635982	0.42282	-6.05491	1.47474e-05	0.00281277	down
TRINITY_DN95782_c0_g1	0.574079	38.2948	-6.05975	4.92091e-05	0.0069327	down
TRINITY_DN76492_c0_g1	0.0186167	1.24186	-6.05977	4.82946e-06	0.00122985	down
TRINITY_DN98371_c1_g1	0.49635	33.2878	-6.06749	0.000231269	0.0207515	down
TRINITY_DN62262_c0_g1	0.00408668	0.274845	-6.07154	0.000503897	0.034359	down
TRINITY_DN68926_c0_g1	0.012931	0.872014	-6.07545	2.12357e-06	0.000653124	down
TRINITY_DN58396_c0_g1	0.0036	0.243166	-6.0778	0.000104461	0.0117279	down
TRINITY_DN70165_c1_g2	0.0108896	0.739899	-6.0863	2.7676e-06	0.000800468	down
TRINITY_DN81915_c1_g2	0.00222772	0.152328	-6.09547	0.000830037	0.0470177	down
TRINITY_DN65598_c0_g1	0.0146968	1.00795	-6.09979	6.49522e-05	0.00835549	down
TRINITY_DN69252_c2_g2	0.0114676	0.790396	-6.10694	9.96711e-05	0.0113318	down
TRINITY_DN64852_c0_g1	0.0142819	0.98498	-6.10783	0.000509348	0.0344884	down
TRINITY_DN65390_c0_g1	0.0184891	1.27875	-6.11192	1.5164e-08	1.22203e-05	down
TRINITY_DN70713_c2_g1	0.0135996	0.941035	-6.11261	8.22286e-06	0.00185894	down
TRINITY_DN67656_c0_g3	0.00402967	0.279187	-6.11443	4.50985e-05	0.00641924	down
TRINITY_DN63799_c0_g1	0.00457268	0.31898	-6.12428	6.29716e-05	0.00818509	down
TRINITY_DN86739_c1_g3	0.0122174	0.854096	-6.12739	1.45949e-06	0.000492209	down
TRINITY_DN68540_c0_g1	0.10771	7.5729	-6.13562	1.77503e-06	0.00055771	down
TRINITY_DN70362_c2_g2	0.0199357	1.40346	-6.13749	0.000771566	0.04478	down
TRINITY_DN78694_c3_g1	1.51226	106.551	-6.13869	0.000127656	0.0134829	down
TRINITY_DN73845_c0_g2	0.013995	0.988121	-6.14171	8.33011e-08	5.64039e-05	down
TRINITY_DN68969_c3_g1	0.0237553	1.68592	-6.14914	6.21395e-09	5.37396e-06	down
TRINITY_DN89347_c0_g3	0.018216	1.2945	-6.15105	1.58998e-06	0.000514372	down
TRINITY_DN68582_c0_g1	0.018865	1.34406	-6.15474	0.000123209	0.013221	down
TRINITY_DN67565_c0_g2	0.00561015	0.402334	-6.16421	0.000160891	0.0160978	down
TRINITY_DN66901_c0_g1	0.00446783	0.320524	-6.16471	2.33847e-05	0.00396942	down
TRINITY_DN66477_c1_g1	0.00431023	0.310495	-6.17066	0.000106001	0.0118656	down
TRINITY_DN70357_c1_g2	0.0860578	6.20238	-6.17137	4.27356e-06	0.00111428	down
TRINITY_DN52766_c0_g1	0.0271168	1.95592	-6.17251	2.12542e-05	0.00368665	down
TRINITY_DN72186_c4_g2	0.00677683	0.49357	-6.1865	1.60867e-05	0.00300366	down
TRINITY_DN63361_c0_g2	0.00865508	0.630652	-6.18715	2.86477e-05	0.00464247	down
TRINITY_DN76552_c2_g3	0.00367977	0.270364	-6.19915	0.000471602	0.0329281	down
TRINITY_DN75836_c0_g1	0.00567874	0.417382	-6.19965	7.85782e-07	0.000316293	down
TRINITY_DN69933_c3_g1	0.11038	8.12545	-6.2019	2.68995e-07	0.000138211	down
TRINITY_DN70005_c1_g3	0.0426936	3.1512	-6.20574	5.26614e-05	0.00723702	down
TRINITY_DN87646_c0_g4	0.0111624	0.824419	-6.20666	0.00027056	0.0229889	down
TRINITY_DN90150_c0_g4	0.299463	22.1208	-6.20688	7.61349e-07	0.000307878	down
TRINITY_DN66733_c1_g1	0.0087023	0.645231	-6.21228	5.56992e-06	0.00137434	down
TRINITY_DN64121_c0_g1	0.00439698	0.327927	-6.22072	8.53736e-05	0.0101596	down
TRINITY_DN68244_c0_g1	0.0114209	0.852874	-6.22258	1.5774e-05	0.00296941	down
TRINITY_DN82080_c0_g5	0.0964581	7.21885	-6.22572	0.000126795	0.0134245	down
TRINITY_DN97767_c1_g2	0.0414248	3.12276	-6.23618	0.000678091	0.0414358	down
TRINITY_DN67109_c0_g2	0.00528748	0.402308	-6.24958	4.03418e-05	0.00593221	down
TRINITY_DN69722_c2_g3	0.101348	7.7898	-6.26419	5.20478e-06	0.00129892	down
TRINITY_DN70003_c0_g5	0.0247053	1.8997	-6.2648	1.423e-05	0.00275597	down
TRINITY_DN69609_c0_g1	0.00744537	0.573244	-6.26666	1.23168e-05	0.00248461	down
TRINITY_DN76126_c3_g3	0.00757112	0.584566	-6.27071	9.20452e-07	0.000365449	down
TRINITY_DN73718_c0_g5	0.00649318	0.506072	-6.28427	7.22251e-06	0.00168293	down
TRINITY_DN66495_c1_g1	0.00392643	0.306241	-6.2853	4.01157e-05	0.00590986	down
TRINITY_DN67707_c1_g1	0.00734503	0.580321	-6.30394	4.12543e-06	0.00107971	down
TRINITY_DN74675_c1_g2	0.0519145	4.11026	-6.30695	7.04124e-08	4.8812e-05	down
TRINITY_DN81098_c0_g2	0.00873832	0.711493	-6.34735	0.000113327	0.01242	down
TRINITY_DN83636_c2_g3	0.00638113	0.521906	-6.35383	3.74921e-05	0.0055941	down
TRINITY_DN74820_c2_g1	0.0155438	1.27233	-6.35499	0.000181272	0.0174722	down
TRINITY_DN73737_c1_g1	0.0168737	1.3812	-6.355	1.79517e-06	0.00056001	down
TRINITY_DN63273_c0_g1	0.00800682	0.659581	-6.36418	0.000404605	0.0301545	down
TRINITY_DN67095_c0_g1	0.00388518	0.321132	-6.36904	5.79697e-05	0.00767194	down
TRINITY_DN61810_c0_g1	0.0032169	0.266678	-6.37329	3.73439e-06	0.00100058	down
TRINITY_DN70807_c0_g1	0.018277	1.51983	-6.37774	9.57e-07	0.000373175	down
TRINITY_DN85044_c2_g2	0.0139443	1.16554	-6.38517	3.57734e-05	0.00549156	down
TRINITY_DN70713_c1_g2	0.0192422	1.61841	-6.39416	9.91632e-05	0.0112928	down
TRINITY_DN71280_c2_g1	1.15689	97.7864	-6.40131	2.09621e-05	0.00366929	down
TRINITY_DN123269_c0_g1	0.043037	3.63883	-6.40175	1.09444e-06	0.000413835	down
TRINITY_DN73726_c1_g7	0.0216719	1.83728	-6.40559	1.21155e-07	7.29832e-05	down
TRINITY_DN77565_c1_g1	0.0546719	4.63811	-6.40659	3.76736e-05	0.00560592	down
TRINITY_DN68468_c1_g3	0.00490627	0.41637	-6.4071	1.12575e-07	7.06797e-05	down
TRINITY_DN72702_c0_g1	0.00572982	0.488159	-6.41272	4.67688e-06	0.00119798	down
TRINITY_DN73538_c1_g1	0.0078755	0.675821	-6.42313	1.46965e-07	8.44535e-05	down
TRINITY_DN97340_c1_g3	0.021568	1.86031	-6.43051	0.000800009	0.0460029	down
TRINITY_DN70207_c1_g3	0.0414368	3.59537	-6.43908	1.33071e-05	0.00262972	down
TRINITY_DN94250_c0_g1	0.0747893	6.49867	-6.44117	0.000125975	0.0133869	down
TRINITY_DN92680_c1_g5	0.077597	6.76605	-6.44617	1.18871e-06	0.000429848	down
TRINITY_DN68950_c1_g3	0.0117432	1.02446	-6.4469	4.92897e-06	0.00125154	down
TRINITY_DN80470_c2_g3	0.77945	68.6689	-6.46106	0.000844186	0.0474804	down
TRINITY_DN68862_c1_g1	0.0089386	0.795631	-6.47591	3.57734e-08	2.6258e-05	down
TRINITY_DN96317_c3_g1	0.066904	5.97497	-6.48069	0.000244461	0.0215035	down
TRINITY_DN65458_c0_g2	0.00531615	0.481515	-6.50106	1.32039e-06	0.000461328	down
TRINITY_DN65196_c0_g1	0.00457721	0.414917	-6.50221	5.50847e-05	0.00746151	down
TRINITY_DN70602_c4_g1	0.0149932	1.36234	-6.50564	0.000295173	0.0242789	down
TRINITY_DN83729_c0_g4	0.121291	11.132	-6.52009	1.74403e-08	1.37239e-05	down
TRINITY_DN53540_c0_g1	0.00462548	0.424669	-6.52059	1.16252e-06	0.000429848	down
TRINITY_DN91050_c0_g1	0.011585	1.07414	-6.53478	3.08142e-08	2.28096e-05	down
TRINITY_DN68278_c2_g1	0.00825403	0.773076	-6.54937	6.36417e-07	0.00026985	down
TRINITY_DN65940_c1_g4	0.00334178	0.315086	-6.55899	0.000345244	0.026901	down
TRINITY_DN70843_c0_g1	0.479353	45.3883	-6.56509	5.72776e-05	0.00761306	down
TRINITY_DN67330_c0_g1	0.00575868	0.547334	-6.57054	4.4347e-05	0.00637398	down
TRINITY_DN67695_c0_g3	0.0125889	1.2086	-6.58504	1.27447e-06	0.000447074	down
TRINITY_DN70462_c2_g1	0.051838	4.98703	-6.58803	2.705e-08	2.03684e-05	down
TRINITY_DN64098_c0_g1	0.00489173	0.470985	-6.58919	0.000407249	0.0302741	down
TRINITY_DN70055_c1_g3	0.0171698	1.67374	-6.60706	0.000471065	0.0329281	down
TRINITY_DN72094_c2_g2	0.00935803	0.914366	-6.61042	3.01369e-07	0.000149566	down
TRINITY_DN87252_c3_g1	0.0778783	7.64545	-6.61724	7.93723e-05	0.00960863	down
TRINITY_DN30586_c0_g1	0.00271113	0.266645	-6.61988	0.000791678	0.0456139	down
TRINITY_DN66874_c1_g2	0.0051633	0.509359	-6.62424	3.15525e-06	0.000886179	down
TRINITY_DN67698_c0_g1	0.0103038	1.02956	-6.64271	3.59828e-06	0.000979125	down
TRINITY_DN84417_c1_g1	0.00690885	0.692735	-6.64771	9.84172e-07	0.000382064	down
TRINITY_DN68425_c1_g4	0.0205697	2.08765	-6.66522	0.000658498	0.040735	down
TRINITY_DN72242_c1_g1	0.00807383	0.829818	-6.6834	1.97497e-07	0.000107148	down
TRINITY_DN70937_c0_g1	0.00470268	0.486967	-6.6942	1.84702e-07	0.000101467	down
TRINITY_DN88050_c0_g2	0.0254652	2.64375	-6.69792	4.58713e-07	0.000211996	down
TRINITY_DN66572_c1_g1	0.0158414	1.66401	-6.71482	0.000412557	0.0305387	down
TRINITY_DN69401_c0_g1	0.0130735	1.38632	-6.72847	7.21086e-07	0.000297098	down
TRINITY_DN69955_c3_g4	0.0115979	1.23415	-6.73352	1.86692e-05	0.00338503	down
TRINITY_DN77233_c0_g1	0.780593	83.2245	-6.73629	2.52768e-08	1.91987e-05	down
TRINITY_DN79672_c0_g1	0.468373	50.3698	-6.74876	0.000169583	0.0167487	down
TRINITY_DN71818_c0_g4	0.0267383	2.88204	-6.75203	0.000414773	0.0306508	down
TRINITY_DN66556_c0_g1	0.0112003	1.21256	-6.75838	5.48233e-07	0.000241851	down
TRINITY_DN92944_c0_g1	0.0086344	0.936593	-6.76118	6.77096e-09	5.79827e-06	down
TRINITY_DN67006_c1_g1	0.00311677	0.34287	-6.78147	0.000332936	0.0261796	down
TRINITY_DN66183_c0_g1	0.00620693	0.683486	-6.78289	4.99019e-05	0.00700769	down
TRINITY_DN68715_c2_g2	0.020786	2.31641	-6.80013	0.000300829	0.0244544	down
TRINITY_DN92991_c3_g2	0.0118373	1.32474	-6.80623	0.000120001	0.0130208	down
TRINITY_DN66969_c1_g1	0.00361625	0.404948	-6.8071	9.44455e-07	0.000371601	down
TRINITY_DN83747_c0_g1	0.414256	46.4577	-6.80925	6.92465e-05	0.00868278	down
TRINITY_DN67609_c0_g1	0.00381123	0.428099	-6.81154	8.40509e-08	5.64738e-05	down
TRINITY_DN67000_c0_g1	0.00732373	0.822808	-6.81183	1.4403e-05	0.00276614	down
TRINITY_DN79086_c0_g3	0.0308907	3.50809	-6.82737	1.45102e-06	0.000492209	down
TRINITY_DN65930_c1_g1	0.00461258	0.526312	-6.8342	0.000113661	0.0124411	down
TRINITY_DN70611_c0_g1	0.00456963	0.522168	-6.83629	9.42023e-07	0.000371601	down
TRINITY_DN86959_c1_g4	0.0258227	2.97396	-6.8476	9.88298e-08	6.30108e-05	down
TRINITY_DN72928_c4_g1	0.00917085	1.06101	-6.85417	4.74984e-08	3.45737e-05	down
TRINITY_DN69617_c0_g1	0.0101107	1.17886	-6.86537	0.00011401	0.0124636	down
TRINITY_DN88553_c5_g1	0.0047716	0.556406	-6.86552	1.54341e-05	0.00292434	down
TRINITY_DN71704_c3_g2	0.00681325	0.803872	-6.88248	7.04156e-05	0.00879913	down
TRINITY_DN67945_c0_g1	0.00911075	1.07698	-6.8852	5.01536e-06	0.00126979	down
TRINITY_DN73738_c0_g4	0.100066	11.9851	-6.90415	5.77506e-07	0.00024972	down
TRINITY_DN69144_c0_g3	0.00267155	0.324122	-6.92272	0.000301044	0.0244544	down
TRINITY_DN91657_c1_g3	0.0228845	2.78461	-6.92696	0.000545177	0.0359393	down
TRINITY_DN81847_c0_g1	0.0501629	6.12867	-6.93281	8.29943e-05	0.00991697	down
TRINITY_DN67921_c0_g1	0.00851848	1.04487	-6.93851	9.67756e-05	0.0110839	down
TRINITY_DN67673_c0_g1	0.00943615	1.1622	-6.94445	2.9259e-07	0.000146663	down
TRINITY_DN68267_c0_g1	0.00522372	0.647113	-6.9528	0.000207966	0.0194196	down
TRINITY_DN92703_c1_g5	0.0926795	11.4958	-6.95464	6.31354e-05	0.00819419	down
TRINITY_DN84382_c4_g2	0.0332134	4.15833	-6.9681	0.000126669	0.0134245	down
TRINITY_DN70199_c0_g4	0.0153461	1.92872	-6.97363	0.000238882	0.021119	down
TRINITY_DN74244_c0_g2	0.17271	21.8804	-6.98514	3.03116e-05	0.00484627	down
TRINITY_DN97326_c1_g1	0.0364985	4.71045	-7.01188	1.43714e-06	0.000492209	down
TRINITY_DN66900_c0_g1	0.00551122	0.718899	-7.02728	0.000314193	0.0249944	down
TRINITY_DN96522_c1_g1	0.0830965	10.9782	-7.04564	4.64955e-05	0.00658224	down
TRINITY_DN69144_c0_g5	0.00446645	0.592089	-7.05054	4.05151e-05	0.00593778	down
TRINITY_DN91665_c0_g3	0.014711	1.95801	-7.05635	6.02874e-05	0.00791869	down
TRINITY_DN95543_c0_g1	0.75435	100.714	-7.06082	9.08971e-08	6.01484e-05	down
TRINITY_DN88384_c1_g1	0.00970972	1.30303	-7.06823	9.53099e-08	6.25942e-05	down
TRINITY_DN82647_c0_g1	0.00475922	0.639233	-7.06947	0.000480844	0.0333417	down
TRINITY_DN82948_c0_g6	0.0316218	4.26871	-7.07674	1.69395e-07	9.47074e-05	down
TRINITY_DN70713_c1_g1	0.0220331	2.98313	-7.08101	9.01518e-05	0.0105415	down
TRINITY_DN97340_c2_g2	0.013965	1.89706	-7.0858	3.79669e-06	0.00101416	down
TRINITY_DN66727_c0_g2	0.0244402	3.33823	-7.09369	3.48412e-09	3.10538e-06	down
TRINITY_DN65530_c0_g1	0.00262785	0.358947	-7.09374	0.000508248	0.0344674	down
TRINITY_DN67403_c2_g2	0.0196143	2.76157	-7.13744	1.27144e-07	7.5038e-05	down
TRINITY_DN68342_c0_g1	0.00691817	0.975349	-7.13939	1.73705e-05	0.00318376	down
TRINITY_DN70504_c1_g3	0.0153271	2.20162	-7.16633	2.88679e-07	0.000145753	down
TRINITY_DN67611_c2_g1	0.00974197	1.41037	-7.17764	5.83588e-06	0.00142786	down
TRINITY_DN68448_c0_g1	0.0025895	0.381461	-7.20272	9.86736e-08	6.30108e-05	down
TRINITY_DN68031_c1_g2	0.0115988	1.71113	-7.20483	7.24534e-08	4.98314e-05	down
TRINITY_DN90465_c3_g2	0.075722	11.4956	-7.24615	5.26409e-06	0.00130998	down
TRINITY_DN82414_c2_g1	0.00734818	1.13517	-7.27131	8.49823e-06	0.00189619	down
TRINITY_DN93517_c4_g7	0.0493355	7.6692	-7.28031	7.123e-06	0.00167511	down
TRINITY_DN68943_c0_g1	0.00631415	0.984273	-7.28433	2.19404e-08	1.69596e-05	down
TRINITY_DN62253_c0_g1	0.00321863	0.503291	-7.2888	0.000641392	0.0401029	down
TRINITY_DN64789_c0_g1	0.0150997	2.38374	-7.30256	0.000334036	0.0262384	down
TRINITY_DN98546_c2_g2	0.067128	10.6635	-7.31155	8.41648e-06	0.00188501	down
TRINITY_DN71176_c1_g4	0.012003	2.01157	-7.38878	1.02791e-10	1.09494e-07	down
TRINITY_DN65957_c0_g1	0.010104	1.71374	-7.40608	0.000103128	0.0116834	down
TRINITY_DN88050_c1_g5	0.0365135	6.2409	-7.41718	8.28472e-09	6.89186e-06	down
TRINITY_DN74113_c3_g3	0.147125	25.1703	-7.41854	0.000269326	0.0229287	down
TRINITY_DN70104_c1_g1	0.00432187	0.751966	-7.44287	8.55411e-08	5.70363e-05	down
TRINITY_DN68260_c1_g1	0.00870207	1.53331	-7.46108	1.71314e-07	9.47074e-05	down
TRINITY_DN69342_c4_g4	0.052136	9.36968	-7.48958	5.78102e-06	0.00141841	down
TRINITY_DN76620_c0_g1	0.0036687	0.679894	-7.5339	2.27174e-07	0.000119536	down
TRINITY_DN66759_c0_g1	0.00909495	1.68738	-7.53551	7.41677e-06	0.0017146	down
TRINITY_DN67689_c0_g1	0.018298	3.44705	-7.55753	4.56068e-06	0.00117511	down
TRINITY_DN96979_c1_g1	0.0276838	5.2903	-7.57816	9.53145e-06	0.0020506	down
TRINITY_DN91645_c0_g4	0.0197425	3.80319	-7.58976	0.000367418	0.0280053	down
TRINITY_DN67705_c5_g5	0.0267367	5.17312	-7.59607	4.21969e-07	0.000199231	down
TRINITY_DN81736_c2_g1	0.0037895	0.73755	-7.60459	2.47318e-08	1.89496e-05	down
TRINITY_DN66496_c0_g2	0.00273405	0.535912	-7.61481	0.000858992	0.0480041	down
TRINITY_DN81120_c0_g1	0.00308675	0.614345	-7.63682	8.03793e-09	6.75085e-06	down
TRINITY_DN69787_c0_g4	0.149798	29.9178	-7.64184	2.82148e-06	0.00081336	down
TRINITY_DN66539_c1_g1	0.0261257	5.27974	-7.65885	2.71261e-12	2.99922e-09	down
TRINITY_DN69235_c0_g1	0.0064845	1.35733	-7.70956	9.62863e-08	6.27635e-05	down
TRINITY_DN71159_c2_g1	0.0178902	3.93597	-7.78141	0.000241539	0.0212679	down
TRINITY_DN72326_c1_g2	0.00442772	1.00832	-7.83117	1.35945e-05	0.0026684	down
TRINITY_DN71690_c0_g1	0.0114287	2.68049	-7.8737	2.08968e-09	2.00579e-06	down
TRINITY_DN96939_c2_g4	0.102045	25.2824	-7.95279	7.02736e-09	5.95941e-06	down
TRINITY_DN86209_c0_g1	0.00885913	2.24975	-7.98838	0.000233618	0.0208189	down
TRINITY_DN91665_c0_g1	0.031187	7.92957	-7.99015	0.000168746	0.0167304	down
TRINITY_DN67468_c1_g6	0.0197737	5.15311	-8.02572	7.30605e-05	0.00902633	down
TRINITY_DN87089_c0_g1	0.00307147	0.845536	-8.1048	2.70162e-06	0.000783981	down
TRINITY_DN79732_c0_g1	0.00605663	1.71807	-8.14806	5.00827e-05	0.00701345	down
TRINITY_DN64996_c0_g1	0.00392965	1.11554	-8.14912	0.000128838	0.0135313	down
TRINITY_DN73269_c0_g1	0.139505	42.8179	-8.26176	1.91055e-07	0.0001043	down
TRINITY_DN67350_c1_g2	0.00305728	0.971455	-8.31175	3.68629e-06	0.000993785	down
TRINITY_DN75968_c4_g2	0.00796242	2.5777	-8.33866	3.39673e-09	3.05871e-06	down
TRINITY_DN97019_c4_g1	0.545665	179.676	-8.36317	2.46148e-06	0.000731304	down
TRINITY_DN76263_c0_g4	0.350969	118.358	-8.39759	2.12801e-07	0.000112652	down
TRINITY_DN64463_c0_g1	0.0205855	7.07245	-8.42444	4.49349e-07	0.000209889	down
TRINITY_DN87656_c0_g1	0.0166688	5.74107	-8.42802	2.48217e-05	0.00416142	down
TRINITY_DN89702_c0_g2	0.00298885	1.07152	-8.48586	2.67616e-09	2.48312e-06	down
TRINITY_DN80481_c0_g10	0.0197028	7.28159	-8.52971	9.36856e-06	0.00203056	down
TRINITY_DN71096_c2_g1	0.0498322	18.4754	-8.53431	1.17424e-07	7.12523e-05	down
TRINITY_DN87503_c1_g3	0.0130325	4.95891	-8.57177	5.70063e-06	0.00140263	down
TRINITY_DN78557_c1_g1	0.00557338	2.21136	-8.63216	0.000455676	0.0322569	down
TRINITY_DN88402_c0_g2	0.00236173	0.945773	-8.6455	2.50762e-09	2.3552e-06	down
TRINITY_DN66480_c0_g1	0.0776762	32.1578	-8.69348	5.26068e-05	0.00723702	down
TRINITY_DN73857_c0_g1	0.00965293	4.20016	-8.76526	8.92919e-10	9.06904e-07	down
TRINITY_DN78299_c1_g3	0.00679277	3.15142	-8.85778	2.99277e-05	0.00480532	down
TRINITY_DN88631_c0_g3	0.0161883	8.34927	-9.01056	0.000350516	0.0271423	down
TRINITY_DN66652_c0_g1	0.00386873	2.09302	-9.07951	0.000715168	0.0428743	down
TRINITY_DN81724_c0_g1	0.0209583	11.5025	-9.10021	2.46592e-05	0.0041501	down
TRINITY_DN95740_c1_g3	0.0149506	8.32034	-9.1203	0.000590776	0.0378873	down
TRINITY_DN83039_c0_g1	0.0127685	8.27456	-9.33995	0.000284434	0.0237088	down
TRINITY_DN72889_c1_g2	0.0217552	15.2271	-9.45107	6.67569e-08	4.66481e-05	down
TRINITY_DN63757_c0_g1	0.00921447	6.84138	-9.53617	0.000411425	0.0305065	down
TRINITY_DN69787_c0_g1	0.0503432	39.3113	-9.60893	1.77401e-06	0.00055771	down
TRINITY_DN75285_c1_g5	0.0001	0.0878172	-9.77836	3.60937e-05	0.005508	down
TRINITY_DN86897_c0_g5	0.21946	228.848	-10.0262	1.35376e-06	0.000471105	down
TRINITY_DN97658_c3_g2	0.00636637	6.82074	-10.0652	1.52534e-09	1.49701e-06	down
TRINITY_DN71113_c0_g2	0.016979	18.6705	-10.1028	6.11953e-06	0.00147255	down
TRINITY_DN49854_c0_g1	0.0001	0.12729	-10.3139	0.000778656	0.0451016	down
TRINITY_DN66992_c0_g1	0.0001	0.158936	-10.6342	7.92499e-06	0.0018104	down
TRINITY_DN63936_c0_g1	0.0001	0.167995	-10.7142	0.000432829	0.0314753	down
TRINITY_DN63621_c0_g1	0.0001	0.169856	-10.7301	0.00075003	0.0440882	down
TRINITY_DN66780_c0_g2	0.0001	0.17089	-10.7389	0.000245527	0.0215538	down
TRINITY_DN64564_c0_g1	0.0001	0.175298	-10.7756	0.000471228	0.0329281	down
TRINITY_DN98677_c1_g3	0.0001	0.176708	-10.7872	0.000690124	0.0419487	down
TRINITY_DN103631_c0_g1	0.0001	0.189857	-10.8907	0.000482614	0.0333504	down
TRINITY_DN65872_c0_g1	0.0001	0.19193	-10.9064	0.000386343	0.0290913	down
TRINITY_DN198886_c0_g1	0.0001	0.195379	-10.9321	0.000129657	0.0135631	down
TRINITY_DN63188_c0_g1	0.0001	0.200355	-10.9683	0.000772723	0.0448174	down
TRINITY_DN64936_c0_g2	0.0001	0.200382	-10.9685	0.000387518	0.0291546	down
TRINITY_DN50165_c0_g1	0.0001	0.202356	-10.9827	0.000381349	0.0288146	down
TRINITY_DN65942_c0_g1	0.0001	0.205038	-11.0017	1.38467e-05	0.0026997	down
TRINITY_DN59801_c0_g2	0.0001	0.205791	-11.007	0.000768633	0.0447317	down
TRINITY_DN67129_c1_g3	0.0001	0.209459	-11.0325	0.000207894	0.0194196	down
TRINITY_DN83701_c1_g6	0.0001	0.209563	-11.0332	0.000865482	0.048305	down
TRINITY_DN17414_c0_g1	0.0001	0.21093	-11.0425	0.000824674	0.0468152	down
TRINITY_DN65149_c0_g2	0.0001	0.213274	-11.0585	2.26802e-06	0.000685484	down
TRINITY_DN65506_c0_g1	0.0001	0.215167	-11.0712	7.95672e-05	0.00961266	down
TRINITY_DN46406_c0_g1	0.0001	0.218137	-11.091	0.000478333	0.0332386	down
TRINITY_DN65300_c0_g2	0.0001	0.221354	-11.1121	0.000189164	0.0180381	down
TRINITY_DN73569_c3_g1	0.0001	0.222583	-11.1201	0.000284381	0.0237088	down
TRINITY_DN65761_c0_g1	0.0001	0.224479	-11.1324	2.11419e-05	0.00368599	down
TRINITY_DN6125_c0_g1	0.0001	0.227128	-11.1493	6.26359e-05	0.0081708	down
TRINITY_DN52866_c0_g2	0.0001	0.227959	-11.1546	0.000516367	0.0346998	down
TRINITY_DN66258_c0_g3	0.0001	0.228186	-11.156	0.000265037	0.0227409	down
TRINITY_DN65857_c0_g1	0.0001	0.228715	-11.1593	8.45868e-05	0.0100934	down
TRINITY_DN64106_c0_g1	0.0001	0.230368	-11.1697	0.000686384	0.0418379	down
TRINITY_DN65363_c0_g1	0.0001	0.231893	-11.1792	0.000275027	0.0232553	down
TRINITY_DN64804_c1_g1	0.0001	0.233946	-11.192	0.000435508	0.0316212	down
TRINITY_DN66514_c0_g1	0.0001	0.236008	-11.2046	0.000360118	0.0277139	down
TRINITY_DN55834_c0_g1	0.0001	0.237757	-11.2153	0.000397262	0.0296832	down
TRINITY_DN63747_c0_g1	0.0001	0.238675	-11.2208	0.000178682	0.0173222	down
TRINITY_DN68297_c0_g1	0.0001	0.238897	-11.2222	0.000612872	0.038848	down
TRINITY_DN62165_c1_g1	0.0001	0.240476	-11.2317	0.000470107	0.0329026	down
TRINITY_DN59915_c0_g1	0.0001	0.242071	-11.2412	0.000507628	0.034452	down
TRINITY_DN61576_c0_g2	0.0001	0.242153	-11.2417	0.000467274	0.0327568	down
TRINITY_DN63561_c0_g1	0.0001	0.242372	-11.243	0.000365845	0.0280053	down
TRINITY_DN58892_c0_g1	0.0001	0.243505	-11.2497	2.28409e-06	0.000687961	down
TRINITY_DN62995_c0_g1	0.0001	0.244035	-11.2529	0.000165521	0.0164667	down
TRINITY_DN66389_c0_g3	0.0001	0.244093	-11.2532	0.000433138	0.0314753	down
TRINITY_DN60354_c0_g2	0.0001	0.244142	-11.2535	0.000173264	0.0169793	down
TRINITY_DN69729_c1_g1	0.0001	0.249803	-11.2866	0.000388167	0.0291783	down
TRINITY_DN13875_c0_g1	0.0001	0.250154	-11.2886	0.000500122	0.0342864	down
TRINITY_DN65139_c1_g2	0.0001	0.25069	-11.2917	2.24476e-06	0.000680809	down
TRINITY_DN64565_c0_g1	0.0001	0.25218	-11.3002	0.00034729	0.0269882	down
TRINITY_DN115391_c0_g1	0.0001	0.252198	-11.3003	3.69168e-05	0.0055692	down
TRINITY_DN19940_c0_g1	0.0001	0.254192	-11.3117	0.000132883	0.0138306	down
TRINITY_DN65127_c0_g1	0.0001	0.254411	-11.3129	0.000133481	0.0138306	down
TRINITY_DN48327_c0_g1	0.0001	0.254509	-11.3135	0.000540625	0.0357471	down
TRINITY_DN63770_c0_g2	0.0001	0.256252	-11.3233	0.000511492	0.0346067	down
TRINITY_DN59908_c0_g1	0.0001	0.257051	-11.3278	0.000771306	0.04478	down
TRINITY_DN82321_c2_g1	0.0001	0.257164	-11.3285	3.65051e-05	0.00554068	down
TRINITY_DN56869_c0_g1	0.0001	0.257443	-11.33	2.01636e-05	0.00356525	down
TRINITY_DN67020_c0_g1	0.0001	0.258936	-11.3384	1.33734e-05	0.00263685	down
TRINITY_DN70885_c1_g9	0.0001	0.260073	-11.3447	0.000189417	0.0180426	down
TRINITY_DN48766_c0_g1	0.0001	0.264071	-11.3667	0.000649829	0.0403548	down
TRINITY_DN62895_c0_g1	0.0001	0.264192	-11.3674	0.000260978	0.0225253	down
TRINITY_DN66381_c0_g2	0.0001	0.265375	-11.3738	5.99916e-06	0.00145963	down
TRINITY_DN66739_c0_g1	0.0001	0.269071	-11.3938	0.000796132	0.0458101	down
TRINITY_DN72351_c0_g3	0.0001	0.272077	-11.4098	3.27697e-05	0.00510219	down
TRINITY_DN67451_c0_g1	0.0001	0.274733	-11.4238	0.000191619	0.0181928	down
TRINITY_DN66197_c0_g1	0.0001	0.274811	-11.4242	0.000585284	0.0375905	down
TRINITY_DN156263_c0_g1	0.0001	0.275165	-11.4261	0.000764519	0.0446082	down
TRINITY_DN65453_c0_g1	0.0001	0.276224	-11.4316	0.000877013	0.0488549	down
TRINITY_DN66409_c0_g3	0.0001	0.277028	-11.4358	0.000107107	0.0119635	down
TRINITY_DN26067_c0_g1	0.0001	0.278121	-11.4415	0.000218563	0.0200114	down
TRINITY_DN65088_c0_g1	0.0001	0.281685	-11.4599	0.000284461	0.0237088	down
TRINITY_DN65336_c0_g1	0.0001	0.282083	-11.4619	1.38085e-06	0.000478623	down
TRINITY_DN59262_c0_g1	0.0001	0.282293	-11.463	0.000304841	0.0245863	down
TRINITY_DN67151_c0_g2	0.0001	0.288052	-11.4921	3.59577e-05	0.00550052	down
TRINITY_DN68450_c0_g1	0.0001	0.288539	-11.4946	3.97891e-06	0.00105613	down
TRINITY_DN63952_c0_g1	0.0001	0.290357	-11.5036	0.00081903	0.0465826	down
TRINITY_DN5882_c0_g1	0.0001	0.290611	-11.5049	4.63271e-07	0.000212975	down
TRINITY_DN65823_c0_g1	0.0001	0.290982	-11.5067	0.000839028	0.0472652	down
TRINITY_DN64624_c0_g1	0.0001	0.292876	-11.5161	0.000701108	0.0421761	down
TRINITY_DN68743_c1_g1	0.0001	0.303051	-11.5653	2.55029e-06	0.000752568	down
TRINITY_DN210998_c0_g1	0.0001	0.306997	-11.584	0.000873104	0.0486682	down
TRINITY_DN62088_c0_g1	0.0001	0.307276	-11.5853	6.4539e-07	0.000270951	down
TRINITY_DN70112_c1_g3	0.0001	0.309113	-11.5939	0.000654049	0.0405222	down
TRINITY_DN63372_c0_g1	0.0001	0.309878	-11.5975	0.000109946	0.0121717	down
TRINITY_DN161281_c0_g1	0.0001	0.310128	-11.5986	0.00065022	0.0403548	down
TRINITY_DN65044_c0_g1	0.0001	0.311196	-11.6036	0.000105716	0.0118536	down
TRINITY_DN64262_c0_g1	0.0001	0.312215	-11.6083	0.000355906	0.0274623	down
TRINITY_DN63068_c0_g1	0.0001	0.313086	-11.6123	0.000260783	0.0225253	down
TRINITY_DN66220_c0_g2	0.0001	0.316343	-11.6273	7.5699e-06	0.00174461	down
TRINITY_DN64134_c0_g1	0.0001	0.316462	-11.6278	0.000576125	0.0373592	down
TRINITY_DN65623_c0_g3	0.0001	0.317348	-11.6319	0.00029767	0.0243656	down
TRINITY_DN65084_c0_g1	0.0001	0.318377	-11.6365	0.000645027	0.0401863	down
TRINITY_DN64416_c0_g1	0.0001	0.319168	-11.6401	0.00034099	0.0266647	down
TRINITY_DN73536_c0_g1	0.0001	0.31993	-11.6435	7.65875e-05	0.00939563	down
TRINITY_DN68211_c0_g1	0.0001	0.320061	-11.6441	3.16748e-07	0.000155433	down
TRINITY_DN63545_c0_g1	0.0001	0.320579	-11.6465	0.000133457	0.0138306	down
TRINITY_DN69617_c2_g5	0.0001	0.32082	-11.6475	5.02641e-05	0.00701345	down
TRINITY_DN66875_c1_g3	0.0001	0.320874	-11.6478	3.15456e-05	0.00495907	down
TRINITY_DN76124_c1_g5	0.0001	0.322755	-11.6562	1.20972e-05	0.00245163	down
TRINITY_DN43802_c0_g1	0.0001	0.325026	-11.6663	0.000455712	0.0322569	down
TRINITY_DN65731_c0_g1	0.0001	0.328579	-11.682	0.000129605	0.0135631	down
TRINITY_DN65895_c1_g1	0.0001	0.330482	-11.6904	1.40295e-06	0.000484363	down
TRINITY_DN66750_c0_g2	0.0001	0.330602	-11.6909	3.30756e-05	0.00514067	down
TRINITY_DN55693_c0_g1	0.0001	0.331597	-11.6952	0.000215851	0.0198254	down
TRINITY_DN67049_c1_g2	0.0001	0.333055	-11.7015	0.000640572	0.0401029	down
TRINITY_DN64449_c0_g1	0.0001	0.333586	-11.7038	0.000544113	0.0358962	down
TRINITY_DN78071_c2_g5	0.0001	0.335837	-11.7135	1.34511e-05	0.0026462	down
TRINITY_DN67123_c0_g1	0.0001	0.336911	-11.7182	3.48671e-06	0.000960736	down
TRINITY_DN68144_c2_g2	0.0001	0.336942	-11.7183	6.03384e-06	0.00146399	down
TRINITY_DN66364_c0_g1	0.0001	0.337205	-11.7194	2.47088e-05	0.00415047	down
TRINITY_DN66136_c0_g2	0.0001	0.338282	-11.724	3.04366e-06	0.000863164	down
TRINITY_DN68360_c0_g2	0.0001	0.339071	-11.7274	1.05095e-05	0.00221199	down
TRINITY_DN66193_c0_g1	0.0001	0.339817	-11.7305	2.85544e-05	0.00463596	down
TRINITY_DN73230_c3_g10	0.0001	0.340072	-11.7316	4.30384e-05	0.00624464	down
TRINITY_DN65479_c0_g2	0.0001	0.342238	-11.7408	6.61935e-05	0.00842828	down
TRINITY_DN68264_c0_g2	0.0001	0.345595	-11.7549	0.000757161	0.0443864	down
TRINITY_DN25805_c0_g1	0.0001	0.345941	-11.7563	0.000812088	0.0463843	down
TRINITY_DN63014_c0_g1	0.0001	0.354349	-11.791	0.000578624	0.0374302	down
TRINITY_DN68128_c0_g2	0.0001	0.358436	-11.8075	3.9183e-05	0.00579107	down
TRINITY_DN54904_c0_g1	0.0001	0.360535	-11.8159	0.000771449	0.04478	down
TRINITY_DN65851_c1_g1	0.0001	0.368202	-11.8463	4.38208e-05	0.00633712	down
TRINITY_DN67796_c0_g3	0.0001	0.373181	-11.8657	0.000153375	0.0155393	down
TRINITY_DN65516_c0_g1	0.0001	0.376434	-11.8782	7.0653e-05	0.00881358	down
TRINITY_DN77097_c1_g4	0.0001	0.377958	-11.884	0.00026847	0.0228864	down
TRINITY_DN65325_c0_g2	0.0001	0.387429	-11.9197	5.73505e-05	0.00761306	down
TRINITY_DN79166_c0_g2	0.0001	0.387944	-11.9216	0.000700273	0.0421761	down
TRINITY_DN67099_c0_g1	0.0001	0.388332	-11.9231	0.00011075	0.0122297	down
TRINITY_DN60251_c0_g1	0.0001	0.389419	-11.9271	0.000127999	0.0134988	down
TRINITY_DN66579_c0_g1	0.0001	0.390472	-11.931	6.47271e-05	0.00833881	down
TRINITY_DN66258_c0_g2	0.0001	0.391646	-11.9353	0.000746316	0.0439908	down
TRINITY_DN67325_c0_g1	0.0001	0.391699	-11.9355	8.63409e-06	0.00190628	down
TRINITY_DN67395_c0_g1	0.0001	0.392798	-11.9396	0.000454179	0.032253	down
TRINITY_DN68314_c0_g4	0.0001	0.392854	-11.9398	1.02208e-05	0.00217745	down
TRINITY_DN68408_c0_g1	0.0001	0.394871	-11.9472	2.3111e-06	0.000693703	down
TRINITY_DN74291_c0_g2	0.0001	0.395258	-11.9486	1.19584e-06	0.000429848	down
TRINITY_DN67005_c0_g1	0.0001	0.397502	-11.9567	0.000260043	0.0224891	down
TRINITY_DN61984_c0_g1	0.0001	0.400936	-11.9692	4.81073e-05	0.0067994	down
TRINITY_DN70081_c0_g2	0.0001	0.402165	-11.9736	1.58811e-06	0.000514372	down
TRINITY_DN65676_c0_g2	0.0001	0.403609	-11.9787	0.000574725	0.0373515	down
TRINITY_DN65617_c0_g3	0.0001	0.407409	-11.9923	5.52027e-05	0.00746407	down
TRINITY_DN68399_c0_g1	0.0001	0.408444	-11.9959	1.56543e-06	0.000510284	down
TRINITY_DN71761_c0_g2	0.0001	0.408728	-11.9969	4.64277e-05	0.00658224	down
TRINITY_DN68374_c0_g1	0.0001	0.409827	-12.0008	0.000223384	0.0202616	down
TRINITY_DN66655_c0_g1	0.0001	0.411964	-12.0083	1.48113e-05	0.00281277	down
TRINITY_DN66273_c0_g3	0.0001	0.412852	-12.0114	0.00065413	0.0405222	down
TRINITY_DN66968_c0_g3	0.0001	0.414554	-12.0173	8.18853e-06	0.00185778	down
TRINITY_DN66086_c0_g2	0.0001	0.418142	-12.0298	0.000162757	0.0162659	down
TRINITY_DN68326_c0_g1	0.0001	0.42082	-12.039	5.53779e-07	0.000241854	down
TRINITY_DN65850_c0_g1	0.0001	0.42086	-12.0391	0.000521557	0.0348824	down
TRINITY_DN66842_c0_g1	0.0001	0.422162	-12.0436	0.000722109	0.0431423	down
TRINITY_DN52301_c0_g1	0.0001	0.426858	-12.0595	0.00023453	0.0208398	down
TRINITY_DN71745_c1_g1	0.0001	0.429807	-12.0695	0.000240276	0.021178	down
TRINITY_DN66991_c0_g1	0.0001	0.431302	-12.0745	3.89116e-06	0.00103622	down
TRINITY_DN56177_c0_g1	0.0001	0.431885	-12.0764	0.000567899	0.0370181	down
TRINITY_DN68412_c3_g1	0.0001	0.432066	-12.077	0.000378312	0.0286347	down
TRINITY_DN68542_c0_g1	0.0001	0.43509	-12.0871	1.55354e-06	0.00051014	down
TRINITY_DN65218_c0_g1	0.0001	0.435258	-12.0877	0.00013731	0.0141434	down
TRINITY_DN67433_c0_g2	0.0001	0.437486	-12.095	8.13465e-05	0.00977356	down
TRINITY_DN65591_c0_g1	0.0001	0.437824	-12.0961	0.000142729	0.0145983	down
TRINITY_DN65331_c0_g1	0.0001	0.441962	-12.1097	0.000112783	0.0123759	down
TRINITY_DN67198_c1_g1	0.0001	0.444357	-12.1175	7.94238e-05	0.00960863	down
TRINITY_DN66274_c0_g1	0.0001	0.447544	-12.1278	1.45567e-06	0.000492209	down
TRINITY_DN76343_c0_g2	0.0001	0.448667	-12.1314	8.58646e-06	0.00190356	down
TRINITY_DN67494_c0_g1	0.0001	0.451852	-12.1416	0.000214073	0.0197511	down
TRINITY_DN67228_c1_g1	0.0001	0.45423	-12.1492	1.5931e-05	0.00299253	down
TRINITY_DN65034_c0_g1	0.0001	0.457168	-12.1585	2.65962e-05	0.0043832	down
TRINITY_DN64904_c0_g1	0.0001	0.45789	-12.1608	0.000294388	0.0242584	down
TRINITY_DN72066_c0_g1	0.0001	0.461922	-12.1734	4.54683e-07	0.000211251	down
TRINITY_DN67682_c0_g2	0.0001	0.462201	-12.1743	0.000365424	0.0280053	down
TRINITY_DN65289_c0_g1	0.0001	0.462285	-12.1746	0.000644776	0.0401863	down
TRINITY_DN65342_c0_g1	0.0001	0.462852	-12.1763	0.000641235	0.0401029	down
TRINITY_DN155739_c0_g1	0.0001	0.463693	-12.179	0.000727389	0.0433096	down
TRINITY_DN69108_c0_g1	0.0001	0.465115	-12.1834	9.15597e-06	0.00198942	down
TRINITY_DN69773_c0_g1	0.0001	0.468399	-12.1935	2.72347e-07	0.000139115	down
TRINITY_DN94381_c1_g4	0.0001	0.469755	-12.1977	0.000677861	0.0414358	down
TRINITY_DN67433_c0_g1	0.0001	0.471279	-12.2024	0.000610741	0.0387692	down
TRINITY_DN70475_c0_g3	0.0001	0.478631	-12.2247	2.88466e-05	0.00466191	down
TRINITY_DN64985_c0_g1	0.0001	0.483447	-12.2391	9.00615e-05	0.0105415	down
TRINITY_DN69004_c0_g1	0.0001	0.487093	-12.25	1.16745e-07	7.12523e-05	down
TRINITY_DN67667_c0_g1	0.0001	0.489237	-12.2563	8.71751e-06	0.00191319	down
TRINITY_DN68744_c0_g2	0.0001	0.490635	-12.2604	0.000109253	0.0121498	down
TRINITY_DN23189_c0_g1	0.0001	0.494484	-12.2717	4.45466e-05	0.00637871	down
TRINITY_DN60934_c0_g1	0.0001	0.500457	-12.289	0.000560053	0.0366644	down
TRINITY_DN69734_c1_g1	0.0001	0.502824	-12.2958	0.000441763	0.0318931	down
TRINITY_DN68915_c0_g1	0.0001	0.50289	-12.296	4.61533e-15	6.7035e-12	down
TRINITY_DN66348_c1_g1	0.0001	0.510589	-12.3179	0.000744999	0.0439685	down
TRINITY_DN65163_c2_g1	0.0001	0.513108	-12.325	4.0796e-06	0.00107656	down
TRINITY_DN68245_c0_g1	0.0001	0.513208	-12.3253	2.17633e-05	0.00376428	down
TRINITY_DN65864_c0_g1	0.0001	0.513553	-12.3263	1.75646e-06	0.000555874	down
TRINITY_DN66148_c0_g1	0.0001	0.521535	-12.3485	0.000124571	0.0133099	down
TRINITY_DN66992_c1_g1	0.0001	0.521996	-12.3498	5.54682e-08	3.9713e-05	down
TRINITY_DN65511_c0_g1	0.0001	0.522857	-12.3522	3.66039e-05	0.00554114	down
TRINITY_DN67124_c0_g1	0.0001	0.523057	-12.3528	2.31112e-05	0.00394276	down
TRINITY_DN65175_c0_g1	0.0001	0.523461	-12.3539	0.000252459	0.0220075	down
TRINITY_DN198913_c0_g1	0.0001	0.530506	-12.3732	0.000584109	0.0375905	down
TRINITY_DN69126_c2_g2	0.0001	0.536713	-12.3899	1.17682e-06	0.000429848	down
TRINITY_DN80574_c0_g3	0.0001	0.538606	-12.395	4.5944e-09	4.05361e-06	down
TRINITY_DN64817_c0_g1	0.0001	0.545144	-12.4124	1.75817e-05	0.00320608	down
TRINITY_DN66541_c1_g1	0.0001	0.545628	-12.4137	1.92378e-05	0.00343808	down
TRINITY_DN67782_c1_g1	0.0001	0.551759	-12.4298	9.80691e-05	0.0111828	down
TRINITY_DN76959_c1_g4	0.0001	0.554837	-12.4378	0.000749441	0.0440882	down
TRINITY_DN68493_c0_g1	0.0001	0.5625	-12.4576	5.25964e-05	0.00723702	down
TRINITY_DN67018_c0_g1	0.0001	0.563572	-12.4604	5.0159e-05	0.00701345	down
TRINITY_DN79590_c2_g1	0.0001	0.571491	-12.4805	3.78706e-19	2.36278e-15	down
TRINITY_DN69446_c3_g1	0.0001	0.575295	-12.4901	4.33896e-07	0.000203761	down
TRINITY_DN66040_c0_g1	0.0001	0.577366	-12.4953	0.000532261	0.0353816	down
TRINITY_DN73278_c0_g1	0.0001	0.582302	-12.5076	1.56566e-06	0.000510284	down
TRINITY_DN65419_c0_g1	0.0001	0.597026	-12.5436	0.000206323	0.0193365	down
TRINITY_DN69737_c3_g9	0.0001	0.59785	-12.5456	9.4928e-07	0.000371824	down
TRINITY_DN72570_c0_g3	0.0001	0.601162	-12.5535	2.71208e-05	0.0044445	down
TRINITY_DN89219_c3_g2	0.0001	0.601336	-12.554	0.000818467	0.0465826	down
TRINITY_DN66584_c0_g2	0.0001	0.602113	-12.5558	4.62914e-05	0.00657466	down
TRINITY_DN88546_c4_g3	0.0001	0.603899	-12.5601	8.33158e-07	0.000332301	down
TRINITY_DN67142_c0_g1	0.0001	0.607786	-12.5693	1.78478e-08	1.39192e-05	down
TRINITY_DN72351_c0_g1	0.0001	0.614026	-12.5841	2.20859e-05	0.00380501	down
TRINITY_DN73514_c0_g1	0.0001	0.618506	-12.5946	5.35644e-07	0.000239933	down
TRINITY_DN65290_c0_g1	0.0001	0.619021	-12.5958	0.000556245	0.0365586	down
TRINITY_DN64958_c0_g1	0.0001	0.620568	-12.5994	0.000389813	0.0292769	down
TRINITY_DN75025_c1_g2	0.0001	0.627247	-12.6148	3.16942e-06	0.000887306	down
TRINITY_DN66693_c1_g1	0.0001	0.62966	-12.6204	0.000443272	0.0319723	down
TRINITY_DN67779_c1_g8	0.0001	0.637749	-12.6388	0.000268567	0.0228864	down
TRINITY_DN84895_c0_g2	0.0001	0.648973	-12.6639	5.23724e-15	7.26123e-12	down
TRINITY_DN66000_c0_g1	0.0001	0.652566	-12.6719	1.87568e-05	0.00338503	down
TRINITY_DN80068_c3_g1	0.0001	0.657701	-12.6832	5.59788e-07	0.000243263	down
TRINITY_DN67109_c0_g3	0.0001	0.660561	-12.6895	0.000210717	0.0195923	down
TRINITY_DN69678_c1_g3	0.0001	0.660618	-12.6896	1.02579e-05	0.00218004	down
TRINITY_DN64498_c0_g1	0.0001	0.661476	-12.6915	0.000450974	0.0321363	down
TRINITY_DN65692_c2_g6	0.0001	0.672097	-12.7145	5.21415e-05	0.00722009	down
TRINITY_DN201129_c0_g1	0.0001	0.676058	-12.7229	1.63244e-14	1.9804e-11	down
TRINITY_DN68360_c0_g4	0.0001	0.679371	-12.73	0.000504974	0.0344056	down
TRINITY_DN66014_c0_g1	0.0001	0.680934	-12.7333	0.000814721	0.0464645	down
TRINITY_DN64851_c1_g1	0.0001	0.686331	-12.7447	2.41841e-06	0.000720957	down
TRINITY_DN66666_c4_g3	0.0001	0.689531	-12.7514	0.000350279	0.0271423	down
TRINITY_DN67806_c0_g1	0.0001	0.695714	-12.7643	2.91438e-06	0.000834631	down
TRINITY_DN66425_c0_g1	0.0001	0.698204	-12.7694	6.40403e-05	0.00827475	down
TRINITY_DN67677_c0_g1	0.0001	0.699299	-12.7717	3.54137e-06	0.000970262	down
TRINITY_DN81564_c2_g1	0.0001	0.700257	-12.7737	6.86799e-05	0.00864407	down
TRINITY_DN75655_c0_g1	0.0001	0.722708	-12.8192	1.15232e-05	0.00235717	down
TRINITY_DN67771_c0_g1	0.0001	0.725039	-12.8238	1.17466e-07	7.12523e-05	down
TRINITY_DN64305_c0_g1	0.0001	0.727461	-12.8287	0.000600449	0.0383137	down
TRINITY_DN63051_c0_g1	0.0001	0.734044	-12.8417	0.000572966	0.0372927	down
TRINITY_DN72041_c1_g3	0.0001	0.741647	-12.8565	1.24984e-05	0.00250964	down
TRINITY_DN64480_c0_g1	0.0001	0.742273	-12.8577	8.73404e-15	1.1219e-11	down
TRINITY_DN68294_c2_g1	0.0001	0.748255	-12.8693	0.000633729	0.0398519	down
TRINITY_DN70119_c1_g2	0.0001	0.750938	-12.8745	5.04032e-05	0.00702163	down
TRINITY_DN67116_c0_g1	0.0001	0.751442	-12.8754	0.000210438	0.0195923	down
TRINITY_DN67383_c0_g2	0.0001	0.760435	-12.8926	0.0002323	0.0207684	down
TRINITY_DN67343_c2_g3	0.0001	0.768947	-12.9087	0.000173023	0.0169793	down
TRINITY_DN87319_c1_g1	0.0001	0.786559	-12.9413	0.000329655	0.0260087	down
TRINITY_DN68349_c0_g1	0.0001	0.791536	-12.9504	2.55015e-06	0.000752568	down
TRINITY_DN76124_c0_g1	0.0001	0.800289	-12.9663	0.000361469	0.0277934	down
TRINITY_DN69691_c0_g2	0.0001	0.819667	-13.0008	2.0549e-07	0.000110425	down
TRINITY_DN81879_c3_g2	0.0001	0.824274	-13.0089	1.91029e-12	2.13921e-09	down
TRINITY_DN70218_c0_g1	0.0001	0.826909	-13.0135	1.27072e-07	7.5038e-05	down
TRINITY_DN89759_c4_g4	0.0001	0.844311	-13.0436	0.000575932	0.0373592	down
TRINITY_DN91213_c1_g6	0.0001	0.845258	-13.0452	0.000473813	0.0330296	down
TRINITY_DN66196_c0_g1	0.0001	0.850919	-13.0548	3.99009e-06	0.00105613	down
TRINITY_DN67643_c0_g1	0.0001	0.855077	-13.0618	3.75301e-05	0.0055941	down
TRINITY_DN92039_c1_g4	0.0001	0.856104	-13.0636	3.0559e-07	0.000150804	down
TRINITY_DN83703_c0_g2	0.0001	0.867947	-13.0834	2.38604e-15	3.8595e-12	down
TRINITY_DN67539_c0_g2	0.0001	0.872224	-13.0905	5.40575e-05	0.00737775	down
TRINITY_DN75429_c0_g1	0.0001	0.884474	-13.1106	1.70479e-06	0.000543462	down
TRINITY_DN88686_c0_g2	0.0001	0.893246	-13.1248	2.17519e-14	2.60269e-11	down
TRINITY_DN75673_c0_g2	0.0001	0.912126	-13.155	0.000164247	0.016396	down
TRINITY_DN67225_c0_g1	0.0001	0.921075	-13.1691	0.000281053	0.0236234	down
TRINITY_DN66960_c4_g5	0.0001	0.92945	-13.1822	0.000226121	0.0204224	down
TRINITY_DN78283_c2_g1	0.0001	0.931732	-13.1857	1.14946e-05	0.00235684	down
TRINITY_DN72366_c1_g3	0.0001	0.939226	-13.1973	0.000725135	0.0432344	down
TRINITY_DN69455_c0_g2	0.0001	0.959161	-13.2276	1.10921e-05	0.00230682	down
TRINITY_DN71473_c1_g2	0.0001	0.96581	-13.2375	5.83138e-07	0.000250913	down
TRINITY_DN65399_c0_g1	0.0001	0.967229	-13.2396	0.00054229	0.0358031	down
TRINITY_DN70121_c0_g1	0.0001	0.968128	-13.241	6.47677e-07	0.000270951	down
TRINITY_DN65426_c0_g1	0.0001	0.996646	-13.2829	4.46202e-15	6.63515e-12	down
TRINITY_DN67906_c0_g1	0.0001	1.00999	-13.3021	1.13286e-07	7.06797e-05	down
TRINITY_DN67756_c0_g1	0.0001	1.01087	-13.3033	9.06079e-15	1.147e-11	down
TRINITY_DN66999_c0_g2	0.0001	1.0393	-13.3433	4.44727e-06	0.00114928	down
TRINITY_DN77145_c1_g7	0.0001	1.03965	-13.3438	0.00013051	0.013636	down
TRINITY_DN73797_c0_g6	0.0001	1.04858	-13.3561	6.80583e-06	0.00161242	down
TRINITY_DN76543_c0_g3	0.0001	1.05248	-13.3615	9.85533e-08	6.30108e-05	down
TRINITY_DN69126_c2_g1	0.0001	1.05388	-13.3634	4.12539e-06	0.00107971	down
TRINITY_DN82208_c0_g1	0.0001	1.06065	-13.3727	7.22521e-06	0.00168293	down
TRINITY_DN97447_c1_g2	0.0001	1.07434	-13.3912	0.000898974	0.0498964	down
TRINITY_DN82596_c1_g3	0.0001	1.07526	-13.3924	0.000431854	0.0314605	down
TRINITY_DN67474_c1_g1	0.0001	1.08397	-13.404	4.01221e-05	0.00590986	down
TRINITY_DN93762_c0_g3	0.0001	1.08581	-13.4065	0.000670515	0.0412157	down
TRINITY_DN64421_c0_g1	0.0001	1.10398	-13.4304	0.000108361	0.0120727	down
TRINITY_DN70938_c0_g2	0.0001	1.12393	-13.4563	5.94594e-08	4.22244e-05	down
TRINITY_DN83565_c0_g3	0.0001	1.13671	-13.4726	6.41569e-10	6.67132e-07	down
TRINITY_DN67386_c0_g1	0.0001	1.14205	-13.4793	2.23674e-05	0.00383891	down
TRINITY_DN77650_c0_g4	0.0001	1.15318	-13.4933	7.26284e-15	9.46847e-12	down
TRINITY_DN67324_c0_g1	0.0001	1.15421	-13.4946	3.65374e-05	0.00554068	down
TRINITY_DN76299_c1_g1	0.0001	1.16885	-13.5128	8.25915e-06	0.00185931	down
TRINITY_DN65551_c0_g1	0.0001	1.1714	-13.5159	1.71603e-06	0.000545055	down
TRINITY_DN72863_c0_g2	0.0001	1.18972	-13.5383	0.000121799	0.0131343	down
TRINITY_DN67439_c0_g1	0.0001	1.20642	-13.5584	6.80253e-05	0.00859885	down
TRINITY_DN91718_c1_g1	0.0001	1.21268	-13.5659	6.00127e-15	8.06451e-12	down
TRINITY_DN69854_c0_g2	0.0001	1.22733	-13.5832	0.000298845	0.0243955	down
TRINITY_DN63934_c0_g1	0.0001	1.25043	-13.6101	1.98682e-05	0.00352014	down
TRINITY_DN73996_c0_g1	0.0001	1.26013	-13.6213	2.9384e-07	0.000146663	down
TRINITY_DN79656_c2_g6	0.0001	1.28824	-13.6531	1.49544e-07	8.53737e-05	down
TRINITY_DN72094_c2_g4	0.0001	1.29521	-13.6609	2.4021e-06	0.000718548	down
TRINITY_DN63582_c0_g1	0.0001	1.33658	-13.7063	6.44371e-06	0.00153781	down
TRINITY_DN65663_c0_g1	0.0001	1.35596	-13.727	2.41014e-07	0.000125309	down
TRINITY_DN82806_c0_g1	0.0001	1.36473	-13.7363	6.68287e-05	0.00848443	down
TRINITY_DN77520_c2_g4	0.0001	1.41412	-13.7876	0.000297464	0.0243656	down
TRINITY_DN74882_c2_g1	0.0001	1.42627	-13.8	2.89981e-09	2.63844e-06	down
TRINITY_DN79336_c2_g3	0.0001	1.42796	-13.8017	1.24074e-15	2.25888e-12	down
TRINITY_DN82358_c3_g1	0.0001	1.42912	-13.8028	1.9459e-15	3.20695e-12	down
TRINITY_DN67414_c0_g1	0.0001	1.43677	-13.8105	3.11071e-06	0.000879324	down
TRINITY_DN91199_c1_g6	0.0001	1.47717	-13.8505	4.23523e-15	6.49007e-12	down
TRINITY_DN79056_c3_g4	0.0001	1.52099	-13.8927	1.92476e-05	0.00343808	down
TRINITY_DN62494_c0_g1	0.0001	1.54746	-13.9176	2.56774e-05	0.00425758	down
TRINITY_DN79851_c0_g2	0.0001	1.5487	-13.9188	0.000367493	0.0280053	down
TRINITY_DN74831_c1_g4	0.0001	1.54915	-13.9192	1.65129e-19	1.1095e-15	down
TRINITY_DN77842_c0_g2	0.0001	1.56936	-13.9379	5.61044e-05	0.00753888	down
TRINITY_DN75555_c2_g3	0.0001	1.57256	-13.9408	1.48306e-06	0.000494935	down
TRINITY_DN72998_c0_g1	0.0001	1.61744	-13.9814	5.42729e-07	0.000240964	down
TRINITY_DN77646_c0_g3	0.0001	1.65854	-14.0176	0.00080182	0.0460191	down
TRINITY_DN80789_c0_g4	0.0001	1.73635	-14.0838	1.47266e-06	0.000494741	down
TRINITY_DN87362_c3_g2	0.0001	1.79352	-14.1305	5.54253e-15	7.56443e-12	down
TRINITY_DN66984_c0_g2	0.0001	1.81776	-14.1499	2.54681e-14	2.96609e-11	down
TRINITY_DN86595_c1_g1	0.0001	1.85993	-14.183	3.25659e-05	0.00508861	down
TRINITY_DN70577_c0_g3	0.0001	1.87739	-14.1964	0.000370962	0.0282005	down
TRINITY_DN65480_c0_g2	0.0001	1.89918	-14.2131	4.32708e-06	0.00112154	down
TRINITY_DN77322_c1_g1	0.0001	1.96323	-14.2609	6.73959e-10	6.92568e-07	down
TRINITY_DN69669_c0_g1	0.0001	1.96882	-14.265	3.62549e-06	0.000980963	down
TRINITY_DN89801_c2_g2	0.0001	1.98936	-14.28	4.68149e-15	6.7035e-12	down
TRINITY_DN89314_c0_g3	0.0001	1.99054	-14.2809	1.0268e-15	1.99306e-12	down
TRINITY_DN97831_c1_g1	0.0001	2.04752	-14.3216	1.52496e-08	1.22203e-05	down
TRINITY_DN70005_c1_g4	0.0001	2.05889	-14.3296	9.43431e-06	0.00203975	down
TRINITY_DN66037_c0_g1	0.0001	2.15077	-14.3926	2.66599e-07	0.00013779	down
TRINITY_DN67779_c1_g1	0.0001	2.3061	-14.4932	5.90291e-09	5.15602e-06	down
TRINITY_DN89314_c0_g6	0.0001	2.35252	-14.5219	0.000420119	0.030889	down
TRINITY_DN87247_c0_g4	0.0001	2.5953	-14.6636	1.05792e-06	0.000407074	down
TRINITY_DN74882_c2_g4	0.0001	2.6278	-14.6816	3.58652e-05	0.005496	down
TRINITY_DN95397_c0_g1	0.0001	2.69461	-14.7178	1.05511e-05	0.0022154	down
TRINITY_DN95738_c3_g2	0.0001	2.74738	-14.7458	0.000650504	0.0403548	down
TRINITY_DN63565_c0_g5	0.0001	2.77492	-14.7602	3.44017e-05	0.00532781	down
TRINITY_DN69401_c0_g2	0.0001	2.78169	-14.7637	1.17035e-06	0.000429848	down
TRINITY_DN88895_c1_g2	0.0001	2.7951	-14.7706	0.000447706	0.0321329	down
TRINITY_DN88232_c3_g3	0.0001	2.80192	-14.7741	3.16502e-15	5.02645e-12	down
TRINITY_DN83531_c2_g2	0.0001	3.02059	-14.8825	2.46807e-14	2.91323e-11	down
TRINITY_DN72106_c0_g1	0.0001	3.02515	-14.8847	8.06782e-08	5.50547e-05	down
TRINITY_DN94468_c0_g1	0.0001	3.06539	-14.9038	0.000697702	0.0421761	down
TRINITY_DN80865_c1_g4	0.0001	3.19433	-14.9632	6.34242e-15	8.39381e-12	down
TRINITY_DN89859_c0_g3	0.0001	3.28673	-15.0044	5.10148e-15	7.18708e-12	down
TRINITY_DN70126_c0_g5	0.0001	3.44869	-15.0738	1.04658e-05	0.00221199	down
TRINITY_DN89468_c1_g7	0.0001	3.58193	-15.1285	0.000290638	0.0240401	down
TRINITY_DN83138_c2_g4	0.0001	3.70385	-15.1767	3.37358e-15	5.26199e-12	down
TRINITY_DN82377_c2_g6	0.0001	3.71461	-15.1809	7.70191e-16	1.56451e-12	down
TRINITY_DN90257_c4_g3	0.0001	3.73556	-15.189	1.5689e-15	2.79671e-12	down
TRINITY_DN81068_c4_g2	0.0001	3.76928	-15.202	0.000901407	0.0499589	down
TRINITY_DN68405_c0_g1	0.0001	3.83735	-15.2278	2.97547e-08	2.22136e-05	down
TRINITY_DN87656_c0_g5	0.0001	4.01734	-15.294	0.000558843	0.0366644	down
TRINITY_DN71929_c2_g9	0.0001	4.04627	-15.3043	3.74409e-05	0.0055941	down
TRINITY_DN94412_c3_g2	0.0001	4.13935	-15.3371	0.000287409	0.0238181	down
TRINITY_DN69461_c0_g1	0.0001	4.13968	-15.3372	3.05667e-10	3.21676e-07	down
TRINITY_DN88762_c3_g1	0.0001	4.21363	-15.3628	1.12338e-14	1.38203e-11	down
TRINITY_DN78817_c2_g2	0.0001	4.2328	-15.3693	1.27358e-05	0.0025398	down
TRINITY_DN68809_c4_g2	0.0001	4.29665	-15.3909	7.93137e-05	0.00960863	down
TRINITY_DN63225_c0_g1	0.0001	4.32486	-15.4004	0.000212154	0.019672	down
TRINITY_DN78791_c0_g1	0.0001	4.37304	-15.4163	5.64448e-21	4.93028e-17	down
TRINITY_DN85401_c1_g2	0.0001	4.4181	-15.4311	1.63609e-07	9.21987e-05	down
TRINITY_DN74559_c0_g1	0.0001	4.49582	-15.4563	1.08374e-21	1.57769e-17	down
TRINITY_DN77226_c2_g1	0.0001	4.70053	-15.5205	8.03687e-13	9.11684e-10	down
TRINITY_DN72489_c1_g1	0.0001	4.76431	-15.54	3.70675e-06	0.000996225	down
TRINITY_DN73393_c1_g2	0.0001	4.84008	-15.5627	7.53688e-07	0.000306498	down
TRINITY_DN90959_c0_g4	0.0001	4.86684	-15.5707	9.44565e-15	1.17864e-11	down
TRINITY_DN69591_c0_g1	0.0001	5.18102	-15.6609	3.56595e-05	0.00548372	down
TRINITY_DN81622_c4_g1	0.0001	5.37684	-15.7145	1.91789e-15	3.20695e-12	down
TRINITY_DN70723_c1_g4	0.0001	5.39523	-15.7194	4.48182e-15	6.63515e-12	down
TRINITY_DN88455_c3_g11	0.0001	5.5519	-15.7607	1.26397e-06	0.000445176	down
TRINITY_DN91471_c1_g2	0.0001	5.62161	-15.7787	5.55726e-05	0.00749006	down
TRINITY_DN73700_c0_g3	0.0001	6.16377	-15.9115	0.000536426	0.0355772	down
TRINITY_DN87530_c0_g3	0.0001	6.1866	-15.9169	4.88189e-20	3.55348e-16	down
TRINITY_DN74675_c1_g4	0.0001	6.7426	-16.041	1.09192e-06	0.000413835	down
TRINITY_DN43759_c0_g1	0.0001	8.06295	-16.299	1.24133e-15	2.25888e-12	down
TRINITY_DN80416_c1_g2	0.0001	10.2271	-16.642	2.92719e-20	2.32438e-16	down
TRINITY_DN69211_c1_g1	0.0001	11.2338	-16.7775	3.7063e-05	0.00557201	down
TRINITY_DN82402_c3_g1	0.0001	11.5006	-16.8114	4.27076e-19	2.48692e-15	down
TRINITY_DN73700_c0_g2	0.0001	12.566	-16.9392	1.09198e-06	0.000413835	down
TRINITY_DN68951_c1_g5	0.0001	13.4644	-17.0388	1.68311e-15	2.88264e-12	down
TRINITY_DN92806_c0_g6	0.0001	13.5392	-17.0468	2.65526e-06	0.000776124	down
TRINITY_DN87373_c0_g7	0.0001	14.5987	-17.1555	8.75963e-16	1.73893e-12	down
TRINITY_DN96334_c0_g2	0.0001	18.279	-17.4798	2.17988e-06	0.000665755	down
TRINITY_DN84046_c2_g1	0.0001	20.8599	-17.6704	1.68028e-15	2.88264e-12	down
TRINITY_DN70409_c3_g4	0.0001	43.6106	-18.7343	1.65561e-21	2.06589e-17	down
TRINITY_DN84241_c0_g1	0.0001	69.0351	-19.397	3.24815e-21	3.54645e-17	down
TRINITY_DN88519_c0_g2	0.0001	849.872	-23.0188	1.69563e-23	4.60702e-19	down
