# Supplementary material for: Comparative Transcriptomics Unveil the Crucial Genes Involved in Coumarin Biosynthesis in Peucedanum praeruptorum Dunn
Source: Front Plant Sci. 2022 May 17;13:899819. doi: 10.3389/fpls.2022.899819 (PMC9152428; doi:10.3389/fpls.2022.899819)
Supplement: Supplementary file 8 [file Table_4.XLSX]

## Sheet: Sheet1
TRINITY_DN99045_c1_g2	CTGAGCAGAATGACTTTTTGGTGGTTGAACCCAATTTTGAAGAAGGGCAAACTCAAAGTTTTGGAGGACAGTGATCTTCCAAAATTACAGCCTGCAGATTGTGCGGACAAGTGTTACTCCTTGTTTATGGAGCAGCTGTCAGCACAGGCGAAGAAAGGATCTTCTGGATCTCTTCCATTTTTATCAACTATATTTATTTGGCAGCGTAAAGCTATCTTACAGTCAGGTATTTTTGCATTGAGCAAGGTACTTGCACTAGCTACTGGCCCCCTGCTACTAAAAGCTTTTATACGGGTTGCTCAAGGGAAGGAAGCATTTAAATATGAGGGATATGCACTAGCTGCAGGCCTATTTTTTGTCAAATTTTTGGAATCACTCTCAGAAAGACAATGGAACTTC…	TIGR00957, Multidrug_resistance-associated_protein_1, multi drug resistance-associated protein (MRP). This model describes multi drug resistance-associated protein (MRP) in eukaryotes. The multidrug resistance-associated protein is an integral membrane protein that causes multidrug resistance when overexpressed in mammalian cells. It belongs to ABC transporter superfamily. The protein topology an…	KOG0054, KOG0054, KOG0054, Multidrug resistance-associated protein/mitoxantrone resistance protein, ABC superfamily [Secondary metabolites biosynthesis, transport and catabolism]. 1.86795e-121	gi|731378104|ref|XP_010658759.1| PREDICTED: ABC transporter C family member 10-like isoform X2 [Vitis vinifera] 5.3e-224	gi|219817013|gb|FJ148077.1| Daucus carota subsp. sativus clone BAC C145E02 genomic sequence 1.04226e-130	pfam00005, ABC_tran, ABC transporter. ABC transporters for a large family of proteins responsible for translocation of a variety of compounds across biological membranes. ABC transporters are the largest family of proteins in many completely sequenced bacteria. ABC transporters are composed of two copies of this domain and two copies of a transmembrane domain pfam00664. These four domains may bel…	sp|Q9LYS2|AB10C_ARATH ABC transporter C family member 10 OS=Arabidopsis thaliana GN=ABCC10 PE=2 SV=2 0.0	tr|F6HUR1|F6HUR1_VITVI Putative uncharacterized protein OS=Vitis vinifera GN=VIT_02s0025g00950 PE=4 SV=1 4.1e-224	GO:0005524, ATP binding;GO:0005774, vacuolar membrane;GO:0008559, xenobiotic transmembrane transporting ATPase activity;GO:0016021, integral component of membrane;GO:0042626, ATPase activity, coupled to transmembrane movement of substances	-
TRINITY_DN99041_c5_g1	CTTTCCTAAGCCAACTGAGTTGACACCACCGCTTATGCAACTAATTGAAGTAACCTTCAGTTATCCCAACAGGGAGGATTTCAGACTCTGTGACGTAGATGTTGGTATCGATATGGGTACACGTGTTGCTATTGTTGGGCCTAATGGGGCTGGGAAATCTACATTGCTTAATCTGCTTGCTGGGGATTTGGTTCCAAGCGAGGGTCAAGTGCGAAGGAGTCAAAAGTTGAGAGTTGGGAGATATTCACAGCACTTTGTTGATCTCCTGACAGTGGAGGAAACTCCTGTTGAGTATCTTCTTCGTCTTCATCCAGATCAAGAAGGATTTAGTAAACAAGAGGCTGTGCGTGCTAAACTTGGGAAATATGGGCTTCCTAGCCATAATCACCTTATCCCAAT…	PLN03073, PLN03073, ABC transporter F family; Provisional. 4.12213e-53	KOG0066, KOG0066, KOG0066, eIF2-interacting protein ABC50 (ABC superfamily) [Translation, ribosomal structure and biogenesis]. 4.57577e-63	gi|1021033531|gb|KZM91315.1| hypothetical protein DCAR_021320 [Daucus carota subsp. sativus] 1.9e-127	gi|1029134387|ref|XM_016889869.1| PREDICTED: Gossypium hirsutum ABC transporter F family member 4-like (LOC107954333), mRNA 4.45886e-167	pfam00005, ABC_tran, ABC transporter. ABC transporters for a large family of proteins responsible for translocation of a variety of compounds across biological membranes. ABC transporters are the largest family of proteins in many completely sequenced bacteria. ABC transporters are composed of two copies of this domain and two copies of a transmembrane domain pfam00664. These four domains may bel…	sp|Q9M1H3|AB4F_ARATH ABC transporter F family member 4 OS=Arabidopsis thaliana GN=ABCF4 PE=2 SV=1 2.69574e-141	tr|A0A0A0LNE5|A0A0A0LNE5_CUCSA Uncharacterized protein OS=Cucumis sativus GN=Csa_2G431120 PE=4 SV=1 1.2e-124	GO:0005215, transporter activity;GO:0005524, ATP binding;GO:0016887, ATPase activity	-
TRINITY_DN98925_c13_g3	TCCAAATACTCAACCATGTGCTGCTGAGAACTCGTAAAACTTCTGTTGAGACATAACACATGAAGAGTATCATAACTACCCACAACCCTCCTAATGCATTTTTATACCTTGCCAAGACTTTCAAACTGACAACTCCTGTTTCCCTTTCCTCCTGCTTAATAAGTATCGATTTCCCTTCTTTAGTTTTCTTTGCCTGGATTCCATCTTTAGGAAAATCATTCGTCACACCATTAACAACAGGTTTCGGAGTTTTGCTATCCTTGTCTATGCCTTCTTCCTCTTCTTCCACATATTCTTCCATTTTTCCCGCATTTTCCATCAGTTTTTGGAACAATATGCCATTGTTTGACAATTCCTCATAAGTTCCTTCCTCTTTTACCATGCCATCATGGACAAGAA…	PLN03130, PLN03130, ABC transporter C family member; Provisional. 0.0	KOG0054, KOG0054, KOG0054, Multidrug resistance-associated protein/mitoxantrone resistance protein, ABC superfamily [Secondary metabolites biosynthesis, transport and catabolism]. 5.70416e-138	gi|470108555|ref|XP_004290581.1| PREDICTED: ABC transporter C family member 2-like [Fragaria vesca subsp. vesca] 3.7e-243	gi|764533689|ref|XM_004290533.2| PREDICTED: Fragaria vesca subsp. vesca ABC transporter C family member 2-like (LOC101290712), mRNA 0.0	pfam00005, ABC_tran, ABC transporter. ABC transporters for a large family of proteins responsible for translocation of a variety of compounds across biological membranes. ABC transporters are the largest family of proteins in many completely sequenced bacteria. ABC transporters are composed of two copies of this domain and two copies of a transmembrane domain pfam00664. These four domains may bel…	sp|Q42093|AB2C_ARATH ABC transporter C family member 2 OS=Arabidopsis thaliana GN=ABCC2 PE=1 SV=2 0.0	tr|B9SKU0|B9SKU0_RICCO Mgatp-energized glutathione s-conjugate pump, putative OS=Ricinus communis GN=RCOM_1092320 PE=4 SV=1 1.4e-242	GO:0000325, plant-type vacuole;GO:0005524, ATP binding;GO:0005773, vacuole;GO:0005774, vacuolar membrane;GO:0008559, xenobiotic transmembrane transporting ATPase activity;GO:0016021, integral component of membrane;GO:0032440, 2-alkenal reductase [NAD(P)] activity;GO:0042626, ATPase activity, coupled to transmembrane movement of substances;GO:1902417, (+)-abscisic acid D-glucopyranosyl ester trans…	-
TRINITY_DN98579_c2_g1	AGAGGCCTTGTCAAGTGCTTCCTGTACAACACGTTCAGACTCGGAGTCCAAAGCACTGGTGGCCTCGTCTAGAAGTAGGATACGGGGTGCTTTTATAATTGCTCGAGCTATTGCTATTCTTTGCTTTTGTCCTCCTGACATTTGTACACCCCTTTCCCCTACCTGGGTATCATAACCCTGAGGCAACTGACTAATGAAGTTATGAGCATTTGCAGCTTTGGCCGCCCCAATAACCTCCTCCATACTTCCATCTTCTTTGCCAAAAAGTATGTTCTCTTTTATTGTTGTTGCAAATAATGCTGGCTCCTGACTCACCAATCCCATTTGTGACCTCAGCCATTTCAACTGCAACTTCTCTATGCCTACTCCATCCACCAATATTTCTCCCCCAACTGGATC…	cd03249, ABC_MTABC3_MDL1_MDL2, ATP-binding cassette domain of a mitochondrial protein MTABC3 and related proteins. MTABC3 (also known as ABCB6) is a mitochondrial ATP-binding cassette protein involved in iron homeostasis and one of four ABC transporters expressed in the mitochondrial inner membrane, the other three being MDL1(ABC7), MDL2, and ATM1. In fact, the yeast MDL1 (multidrug resistance-li…	KOG0055, KOG0055, KOG0055, Multidrug/pheromone exporter, ABC superfamily [Secondary metabolites biosynthesis, transport and catabolism]. 1.18732e-74	gi|1021044645|gb|KZN02426.1| hypothetical protein DCAR_011180 [Daucus carota subsp. sativus] 1.8e-113	gi|325977000|gb|HQ917533.1| Hevea brasiliensis isolate Reyan 7-33-97 multidrug/pheromone exporter protein mRNA, complete cds 3.88366e-131	pfam00664, ABC_membrane, ABC transporter transmembrane region. This family represents a unit of six transmembrane helices. Many members of the ABC transporter family (pfam00005) have two such regions. 1.14822e-11	sp|Q9LSJ5|AB18B_ARATH ABC transporter B family member 18 OS=Arabidopsis thaliana GN=ABCB18 PE=3 SV=1 1.22914e-105	tr|F6HV62|F6HV62_VITVI Putative uncharacterized protein OS=Vitis vinifera GN=VIT_14s0066g02320 PE=4 SV=1 2.4e-102	GO:0005524, ATP binding;GO:0016021, integral component of membrane;GO:0042626, ATPase activity, coupled to transmembrane movement of substances;GO:0055085, transmembrane transport	-
TRINITY_DN98037_c0_g1	TGCTCTTCCGATCTGTCGCCTTCTCCTACCCTTCCAACCCCACCAACCCCATCCTCCACAACATATCCTTCCACGTCCCCCACGGCCAGACTGTCGCGATCGTCGGACCCTCCGGCTCAGGTAAATCCACCATAATCGCCCTAATCGAACGCTTCTACGCTGCCACCACAGGCCAAATCCGCATCGGCGGCGTCGCCCTCAGCGACACAAACATCGACACCTACCGTGATCACGTCTCCCTCGTAGCCCAAGA	cd03249, ABC_MTABC3_MDL1_MDL2, ATP-binding cassette domain of a mitochondrial protein MTABC3 and related proteins. MTABC3 (also known as ABCB6) is a mitochondrial ATP-binding cassette protein involved in iron homeostasis and one of four ABC transporters expressed in the mitochondrial inner membrane, the other three being MDL1(ABC7), MDL2, and ATM1. In fact, the yeast MDL1 (multidrug resistance-li…	KOG0055, KOG0055, KOG0055, Multidrug/pheromone exporter, ABC superfamily [Secondary metabolites biosynthesis, transport and catabolism]. 5.36529e-26	gi|326514926|dbj|BAJ99824.1| predicted protein [Hordeum vulgare subsp. vulgare] 9.9e-17	-	pfam00005, ABC_tran, ABC transporter. ABC transporters for a large family of proteins responsible for translocation of a variety of compounds across biological membranes. ABC transporters are the largest family of proteins in many completely sequenced bacteria. ABC transporters are composed of two copies of this domain and two copies of a transmembrane domain pfam00664. These four domains may bel…	sp|Q6YUU5|MDR_ORYSJ Putative multidrug resistance protein OS=Oryza sativa subsp. japonica GN=Os02g0190300 PE=3 SV=1 3.79094e-20	tr|M0WSW4|M0WSW4_HORVD Uncharacterized protein OS=Hordeum vulgare var. distichum PE=4 SV=1 7.5e-17	GO:0005524, ATP binding;GO:0005886, plasma membrane;GO:0008361, regulation of cell size;GO:0009506, plasmodesma;GO:0009637, response to blue light;GO:0009640, photomorphogenesis;GO:0009733, response to auxin;GO:0009926, auxin polar transport;GO:0009958, positive gravitropism;GO:0010328, auxin influx transmembrane transporter activity;GO:0010329, auxin efflux transmembrane transporter activity;GO:…	-
TRINITY_DN97998_c3_g1	TTGTACGAGGAAGTCTTACGAGTTTGTTGCTTACAAAAGGATATGGAAGTTATGGAGCATGGGGACCAGACAGAGATTGGAGAGCGTGGAATCAACCTCAGTGGTGGCCAGAAGCAGCGGATACAGCTTGCTAGAGCTGTATATCAGGACTGTGATATATATCTTCTCGATGATGTCTTTAGTGCTGTTGATGCTGAAACAGGATCAGAAATATTCAAGGAATGTGTCAGGGGAGCCCTTAAAGATAAGACAGTTTTACTTGTTACCCACCAAGTTGATTTCTTGCACAATGCTGATCTCATATTGGTCATGCGAGATGGGAAGATTGTGGAGTCCGGAAGGTATGAACCACTTCTTAAAGCTGGACTGGATTTTGGTGCTCTTGTAGCTGCCCATGAA…	TIGR00957, Multidrug_resistance-associated_protein_1, multi drug resistance-associated protein (MRP). This model describes multi drug resistance-associated protein (MRP) in eukaryotes. The multidrug resistance-associated protein is an integral membrane protein that causes multidrug resistance when overexpressed in mammalian cells. It belongs to ABC transporter superfamily. The protein topology an…	KOG0054, KOG0054, KOG0054, Multidrug resistance-associated protein/mitoxantrone resistance protein, ABC superfamily [Secondary metabolites biosynthesis, transport and catabolism]. 0.0	gi|1021027719|gb|KZM85506.1| hypothetical protein DCAR_027072 [Daucus carota subsp. sativus] 0.0e+00	gi|764535684|ref|XM_004290737.2| PREDICTED: Fragaria vesca subsp. vesca ABC transporter C family member 14 (LOC101305329), transcript variant X2, mRNA 0.0	pfam00005, ABC_tran, ABC transporter. ABC transporters for a large family of proteins responsible for translocation of a variety of compounds across biological membranes. ABC transporters are the largest family of proteins in many completely sequenced bacteria. ABC transporters are composed of two copies of this domain and two copies of a transmembrane domain pfam00664. These four domains may bel…	sp|Q9LZJ5|AB14C_ARATH ABC transporter C family member 14 OS=Arabidopsis thaliana GN=ABCC14 PE=1 SV=1 0.0	tr|A0A0J8B7U5|A0A0J8B7U5_BETVU Uncharacterized protein OS=Beta vulgaris subsp. vulgaris GN=BVRB_003010 PE=4 SV=1 0.0e+00	GO:0000325, plant-type vacuole;GO:0005524, ATP binding;GO:0005773, vacuole;GO:0005774, vacuolar membrane;GO:0005794, Golgi apparatus;GO:0008559, xenobiotic transmembrane transporting ATPase activity;GO:0016021, integral component of membrane;GO:0042626, ATPase activity, coupled to transmembrane movement of substances	K05666-ko02010 ABC transporters;ko04976 Bile secretion
TRINITY_DN97936_c1_g1	TGCACCAATTGCTCCACTTGAGTTTTCAGGCTTGTCAAACCAACCCACCTCCATCCTAACAACTTTTTCAAAGCACATCAGTCTTATCCGCCTGATTAATTTACAACCAGCCACCGCAAAAAAGTAAGTCTGTGATGGATAAGCAATAAATGATGCCAACCCAAGGACAACAAACATTATCGCCCAGAATTTCGAATCCTTTTTCATTTCATGTGGGGTCTCATAAAATATCTTGATAACGCTGGCGAGTAGTATACCATAAATCGGAAGTATGACACCATTGAGGATAGCAGATATAGCTCCAATTATTAGAACTGGTAACTCAGGCTTGTTAAGATACATAAGTCGGCGCAGTGGGACTTTTTGAGTCTGTTCAGATGATTTTTCGCCAGGGCTTTC…	cd03249, ABC_MTABC3_MDL1_MDL2, ATP-binding cassette domain of a mitochondrial protein MTABC3 and related proteins. MTABC3 (also known as ABCB6) is a mitochondrial ATP-binding cassette protein involved in iron homeostasis and one of four ABC transporters expressed in the mitochondrial inner membrane, the other three being MDL1(ABC7), MDL2, and ATM1. In fact, the yeast MDL1 (multidrug resistance-li…	KOG0055, KOG0055, KOG0055, Multidrug/pheromone exporter, ABC superfamily [Secondary metabolites biosynthesis, transport and catabolism]. 0.0	gi|1021047102|gb|KZN04882.1| hypothetical protein DCAR_005719 [Daucus carota subsp. sativus] 0.0e+00	gi|731395942|ref|XM_010654038.1| PREDICTED: Vitis vinifera ABC transporter B family member 11 (LOC100267452), transcript variant X2, mRNA 0.0	pfam00664, ABC_membrane, ABC transporter transmembrane region. This family represents a unit of six transmembrane helices. Many members of the ABC transporter family (pfam00005) have two such regions. 8.41382e-35	sp|O80725|AB4B_ARATH ABC transporter B family member 4 OS=Arabidopsis thaliana GN=ABCB4 PE=1 SV=1 0.0	tr|F6HZG2|F6HZG2_VITVI Putative uncharacterized protein OS=Vitis vinifera GN=VIT_07s0005g02660 PE=4 SV=1 1.8e-298	GO:0005524, ATP binding;GO:0005886, plasma membrane;GO:0008559, xenobiotic transmembrane transporting ATPase activity;GO:0009506, plasmodesma;GO:0009630, gravitropism;GO:0009733, response to auxin;GO:0009734, auxin-activated signaling pathway;GO:0009735, response to cytokinin;GO:0009926, auxin polar transport;GO:0010315, auxin efflux;GO:0010328, auxin influx transmembrane transporter activity;GO:…	K05658-ko04976 Bile secretion;ko02010 ABC transporters
TRINITY_DN97936_c0_g3	TGATGCAGAATCTGAGAGAATTGTGCAAGAGGCATCGGACAGGATCATGGTTCAGAACCACTGTCATTGTGGCACATCGCTTGAGCACAGTGATAAAGGCTGATATGATTGCAGTGATCAATCAGGGGAAGATGGTTGAAAAAGGCACCATGTTGAATTACTCGAAAATATTGAAGGGCCATACTCCCAGCTTATTAAATTGCAGGCGTTGGCGACAGCGACAAGACAGACATTGGTACAGGAAGTGGTAGAGCTTTAAGTCAAAGGATGTACATTCCATCAGTAGGGTATCTTCTGGTGAATAGAAGCAGCCGTCTTTCACTCACCCTATCGTTTCGCTTACCCACAGGTCTTACTGAAATCACAATAGGAGAACCTAAACCTAAACCTGAACGTGAA…	pfam00664, ABC_membrane, ABC transporter transmembrane region. This family represents a unit of six transmembrane helices. Many members of the ABC transporter family (pfam00005) have two such regions. 5.62809e-18	KOG0055, KOG0055, KOG0055, Multidrug/pheromone exporter, ABC superfamily [Secondary metabolites biosynthesis, transport and catabolism]. 3.5368e-52	gi|1021045762|gb|KZN03543.1| hypothetical protein DCAR_012299 [Daucus carota subsp. sativus] 7.3e-150	gi|731395942|ref|XM_010654038.1| PREDICTED: Vitis vinifera ABC transporter B family member 11 (LOC100267452), transcript variant X2, mRNA 1.21839e-79	pfam00664, ABC_membrane, ABC transporter transmembrane region. This family represents a unit of six transmembrane helices. Many members of the ABC transporter family (pfam00005) have two such regions. 1.3446e-18	sp|O80725|AB4B_ARATH ABC transporter B family member 4 OS=Arabidopsis thaliana GN=ABCB4 PE=1 SV=1 5.84746e-115	tr|U5GLS5|U5GLS5_POPTR Uncharacterized protein OS=Populus trichocarpa GN=POPTR_0002s18860g PE=4 SV=1 7.4e-110	GO:0005524, ATP binding;GO:0005886, plasma membrane;GO:0008559, xenobiotic transmembrane transporting ATPase activity;GO:0009506, plasmodesma;GO:0009630, gravitropism;GO:0009733, response to auxin;GO:0009734, auxin-activated signaling pathway;GO:0009735, response to cytokinin;GO:0009926, auxin polar transport;GO:0010315, auxin efflux;GO:0010328, auxin influx transmembrane transporter activity;GO:…	-
TRINITY_DN97845_c1_g5	CGCATGATGCCGTCGCTTCCACGGTCCAGAAGTTCTATGTTGAAGAGGACGAGAGGAAGTATGGTGTACCGGAGAAGGAGGACGACGGTGAGATTGAGATTGTCAATGCCGACTTCTCTCTTGCCTATGGTGGCATGCTTCTGCTCTCCCACACCAACCTGCGTCTCCTCAAGGGCCATCGTTATGGGCTTTGTGGTCGAAATGGTGCCGGAAAATCTACCTTGATGAAGGCTATTGCGGGAGGCAAACTCGAAGGTTTCCCTCCGCAAGATGTCCTACGGACCTGCTACGTGGAGCACAACCAAGGCGAGGACGCCGATATCAGTATCCTGGATTTTGTCTCTAAAGATCCCACTATTGCCAAAGAAGGTCGGGAGCGCATCATAGAGGTTTTGGAGG…	COG0488, Uup, ATPase components of ABC transporters with duplicated ATPase domains [General function prediction only]. 4.2108e-45	KOG0062, KOG0062, KOG0062, ATPase component of ABC transporters with duplicated ATPase domains/Translation elongation factor EF-3b [Amino acid transport and metabolism, Translation, ribosomal structure and biogenesis]. 2.54979e-104	gi|545364732|ref|XP_005647408.1| elongation factor EF-3 [Coccomyxa subellipsoidea C-169] 5.8e-175	gi|367041665|ref|XM_003651165.1| Thielavia terrestris NRRL 8126 hypothetical protein (THITE_2111231) mRNA, complete cds 0.0	pfam00005, ABC_tran, ABC transporter. ABC transporters for a large family of proteins responsible for translocation of a variety of compounds across biological membranes. ABC transporters are the largest family of proteins in many completely sequenced bacteria. ABC transporters are composed of two copies of this domain and two copies of a transmembrane domain pfam00664. These four domains may bel…	sp|Q08972|NEW1_YEAST [NU+] prion formation protein 1 OS=Saccharomyces cerevisiae (strain ATCC 204508 / S288c) GN=NEW1 PE=1 SV=1 0.0	tr|I0YWU5|I0YWU5_9CHLO Elongation factor EF-3 OS=Coccomyxa subellipsoidea C-169 GN=COCSUDRAFT_47721 PE=4 SV=1 4.4e-175	GO:0003746, translation elongation factor activity;GO:0005524, ATP binding;GO:0005634, nucleus;GO:0005737, cytoplasm;GO:0005844, polysome;GO:0016887, ATPase activity;GO:0016973, poly(A)+ mRNA export from nucleus;GO:0042274, ribosomal small subunit biogenesis	-
TRINITY_DN97799_c3_g1	GCATTCAACGCCAAAGTAAACACCAAGCTTTCCCCCTCCGTCACTTTACCTTCCCATGCCTCTCTCCCCCTTTATCTCTCTCTCTCTCTCTAAAAGTGTAAAACTCTAGTGATTAATTAGGGTTTTGTAGAGGGAACTAGAAGAAGATGAGGTCTTCTGGACGACAGTTGAAGGCCATGCTTCGCAAGAACTGGCTTCTCAAAATTCGTCATCCTTTTGTTACTTTTGCTGAGATCATGCTTCCAACTATTATAATGCTGATGTTAATAGCTGTGAGGACTCAAGTGGATACACAGATCCACCCGGCTCAGTCGTATATTAAAAAGGAATTGTTTATTGAAGTTGGAAAAGATGATGCATCCCCTAGTTTCAATCAAGTTTTAGAACTTCTGTTGGCCA…	TIGR01257, Retinal-specific_ATP-binding_cassette_transporter, retinal-specific rim ABC transporter. This model describes the photoreceptor protein (rim protein) in eukaryotes. It is the member of ABC transporter superfamily. Rim protein is a membrane glycoprotein which is localized in the photoreceptor outer segment discs. Mutation/s in its genetic loci is implicated in the recessive Stargardt's …	KOG0059, KOG0059, KOG0059, Lipid exporter ABCA1 and related proteins, ABC superfamily [Lipid transport and metabolism, General function prediction only]. 5.89843e-74	gi|1021034357|gb|KZM92141.1| hypothetical protein DCAR_020494 [Daucus carota subsp. sativus] 0.0e+00	gi|731399847|ref|XM_010655465.1| PREDICTED: Vitis vinifera ABC transporter A family member 1 (LOC100265905), transcript variant X2, mRNA 0.0	pfam00005, ABC_tran, ABC transporter. ABC transporters for a large family of proteins responsible for translocation of a variety of compounds across biological membranes. ABC transporters are the largest family of proteins in many completely sequenced bacteria. ABC transporters are composed of two copies of this domain and two copies of a transmembrane domain pfam00664. These four domains may bel…	sp|Q84M24|AB1A_ARATH ABC transporter A family member 1 OS=Arabidopsis thaliana GN=ABCA1 PE=2 SV=2 0.0	tr|F6HKV8|F6HKV8_VITVI Putative uncharacterized protein OS=Vitis vinifera GN=VIT_08s0007g08730 PE=4 SV=1 0.0e+00	GO:0005524, ATP binding;GO:0005774, vacuolar membrane;GO:0006869, lipid transport;GO:0016021, integral component of membrane;GO:0042626, ATPase activity, coupled to transmembrane movement of substances;GO:0043231, intracellular membrane-bounded organelle	K05643-ko02010 ABC transporters
TRINITY_DN97727_c2_g1	CCGAACCTGTAAATTATGAATATTGATTTCTCCTCTTGGCGGCCAAGAAGTATCTGGCCTGTTTTCTTGTATGATAAGAGGACCTTCACTAGAAATGGTCATGTATTGAAGAATTCTCTCAACTGATATCATTTTGGTTTCCAAATGACAAAGACAGAATATCATTCCAGTCAGAATATTTTTTAAGTTGAGTCCGTAAGTTACAGCTAGCCCTGCAATTGCTGTACATAAAAATGAAACATGTAAATTAGATATACCACTACATAGGAAAACAAATAAATGATACAAGACAATAGAAAATACATACCAGGATCTATGCTATTTCTAAAGTACATTGAGAGAACCAAGAGGAAGGAATATGTAATACACGAAAATGAATCCAATCGCAACAGCAGCCAT…	TIGR00957, Multidrug_resistance-associated_protein_1, multi drug resistance-associated protein (MRP). This model describes multi drug resistance-associated protein (MRP) in eukaryotes. The multidrug resistance-associated protein is an integral membrane protein that causes multidrug resistance when overexpressed in mammalian cells. It belongs to ABC transporter superfamily. The protein topology an…	KOG0054, KOG0054, KOG0054, Multidrug resistance-associated protein/mitoxantrone resistance protein, ABC superfamily [Secondary metabolites biosynthesis, transport and catabolism]. 1.57736e-135	gi|1021039164|gb|KZM96945.1| hypothetical protein DCAR_015693 [Daucus carota subsp. sativus] 1.9e-248	gi|731335800|ref|XM_010680609.1| PREDICTED: Beta vulgaris subsp. vulgaris ABC transporter C family member 3-like (LOC104894388), mRNA 0.0	pfam00664, ABC_membrane, ABC transporter transmembrane region. This family represents a unit of six transmembrane helices. Many members of the ABC transporter family (pfam00005) have two such regions. 3.52081e-12	sp|Q9LK64|AB3C_ARATH ABC transporter C family member 3 OS=Arabidopsis thaliana GN=ABCC3 PE=1 SV=1 0.0	tr|A0A0K9R6E7|A0A0K9R6E7_SPIOL Uncharacterized protein OS=Spinacia oleracea GN=SOVF_101510 PE=4 SV=1 8.3e-244	GO:0000325, plant-type vacuole;GO:0005524, ATP binding;GO:0005773, vacuole;GO:0005774, vacuolar membrane;GO:0008559, xenobiotic transmembrane transporting ATPase activity;GO:0009506, plasmodesma;GO:0010290, chlorophyll catabolite transmembrane transporter activity;GO:0015431, glutathione S-conjugate-exporting ATPase activity;GO:0016021, integral component of membrane;GO:0042626, ATPase activity, …	-
TRINITY_DN97570_c1_g1	CATCACTGCAGTGTGAGCATGTCAAAAATTGTATAAGACCAGGATGTTGTATCACTGTACGGTTAGGATTAAATTTGCGAGGAGAACCTAATCTGATTGTCCTCATATCCACGGTGTTGATACATTGTAGAGATTATTATTCATGTCCCACAATTATTCATTCAGTGGCTTAAAAGTTAAAATGATTTAGTCACAGGATTACAGTATATATTGGTTCATCAGCTAAGTAATACTCCTCCATCAGTTTCTCTCTGCACATAACTCTATTGCTGCTTAAAGAGTAACCAGTTAGAAGTTACATGGATTCTTCAGATAAAGTATCTAGATGGGCTCCTCTAGTGAGTCCAACAAGATCAATTCTCACGAAATTCATGACTTCGGAGAGAACTAATCAATCCG…	TIGR00955, Protein_white, The Eye Pigment Precursor Transporter (EPP) Family protein. [Transport and binding proteins, Other]. 1.16968e-60	KOG0061, KOG0061, KOG0061, Transporter, ABC superfamily (Breast cancer resistance protein) [Secondary metabolites biosynthesis, transport and catabolism]. 7.63034e-71	gi|359497155|ref|XP_003635438.1| PREDICTED: ABC transporter G family member 11-like [Vitis vinifera] 5.2e-157	gi|1025078763|ref|XM_016598495.1| PREDICTED: Nicotiana tabacum ABC transporter G family member 11-like (LOC107778271), mRNA 2.64851e-141	pfam00005, ABC_tran, ABC transporter. ABC transporters for a large family of proteins responsible for translocation of a variety of compounds across biological membranes. ABC transporters are the largest family of proteins in many completely sequenced bacteria. ABC transporters are composed of two copies of this domain and two copies of a transmembrane domain pfam00664. These four domains may bel…	sp|Q8RXN0|AB11G_ARATH ABC transporter G family member 11 OS=Arabidopsis thaliana GN=ABCG11 PE=1 SV=1 2.94353e-123	tr|F6HD74|F6HD74_VITVI Putative uncharacterized protein OS=Vitis vinifera GN=VIT_00s0625g00020 PE=4 SV=1 4.0e-157	GO:0005524, ATP binding;GO:0005886, plasma membrane;GO:0009611, response to wounding;GO:0009651, response to salt stress;GO:0009737, response to abscisic acid;GO:0009897, external side of plasma membrane;GO:0010222, stem vascular tissue pattern formation;GO:0010588, cotyledon vascular tissue pattern formation;GO:0015245, fatty acid transmembrane transporter activity;GO:0015908, fatty acid transpo…	-
TRINITY_DN97557_c0_g1	TTCGCGATAATATTCTCAATGGACGACCAATGGTGAAAACTAAATATGAGGAAGCCATAAGAGTATGTGCTTTGGATAAGGATATTAATAGCTTTGACTATGGCGATCTTACAGAAATAGGTCAGAGAGGGCTTAACATGAGCGGAGGACAGAAGCAGAGAATTCAACTTTGTCGAGCAGTATATAGTGATGCTGACATCTATCTTCTTGATGATCCATTTAGTGCTGTAGATGCACATACAGCAGCTACTCTTTTTAGTGACTGTGTCATGGCTGCCCTAGAGAAGAAGACTGTCATTCTTGTGACACATCAAGTAGAATTTCTTTCGGTGGTTGACCACATTCTGGTTATGGAATGCGGGAGAATCACTCAATCAGGAAACTACAAGGAACTACTGA…	PLN03232, PLN03232, ABC transporter C family member; Provisional. 1.5126e-137	KOG0054, KOG0054, KOG0054, Multidrug resistance-associated protein/mitoxantrone resistance protein, ABC superfamily [Secondary metabolites biosynthesis, transport and catabolism]. 0.0	gi|645244189|ref|XP_008228319.1| PREDICTED: ABC transporter C family member 8 [Prunus mume] 1.7e-224	gi|720019772|ref|XM_010263891.1| PREDICTED: Nelumbo nucifera ABC transporter C family member 8-like (LOC104600760), mRNA 3.69238e-92	pfam00005, ABC_tran, ABC transporter. ABC transporters for a large family of proteins responsible for translocation of a variety of compounds across biological membranes. ABC transporters are the largest family of proteins in many completely sequenced bacteria. ABC transporters are composed of two copies of this domain and two copies of a transmembrane domain pfam00664. These four domains may bel…	sp|Q8LGU1|AB8C_ARATH ABC transporter C family member 8 OS=Arabidopsis thaliana GN=ABCC8 PE=2 SV=3 0.0	tr|U5GLB0|U5GLB0_POPTR Uncharacterized protein OS=Populus trichocarpa GN=POPTR_0003s02950g PE=4 SV=1 1.8e-218	GO:0005524, ATP binding;GO:0008559, xenobiotic transmembrane transporting ATPase activity;GO:0016021, integral component of membrane;GO:0042626, ATPase activity, coupled to transmembrane movement of substances	-
TRINITY_DN97409_c1_g1	TTCACAAAAATACCGAAATTTTTTAAAGCACTTTTAAAAATACTACTAAAATACTAAAATATGAGGTTGCAAATATTGCATTTGGGTTGTAACGGTTATAAATGTTGCGTTGGTCGCAAGGTGGAAACTTTATTTGTAATTAAGTAAAACTACTACGGATCGGACGAACTAAAATTTTGAGTGTTTCCGCTAGTATAGATTTTCACTTCCAATCAATCGTCTATGCAGAGATGATGTTAGAAGATATGCTTGTAAGCTGCAAAACTAATGCGAAAGTCTGTTATAAAACTTCCATTTCCTTTTCGTTCCATTTTGTTGGTTATACTCCATATTTTTCAATGGTGCATATCACATTGCCTTGTGTAGTTTATAGGCAAGCACCTCTACATGCAATATAAA…	COG1132, MdlB, ABC-type multidrug transport system, ATPase and permease components [Defense mechanisms]. 1.82909e-92	KOG0055, KOG0055, KOG0055, Multidrug/pheromone exporter, ABC superfamily [Secondary metabolites biosynthesis, transport and catabolism]. 0.0	gi|1021048097|gb|KZN05877.1| hypothetical protein DCAR_006714 [Daucus carota subsp. sativus] 0.0e+00	gi|747100878|ref|XM_011100244.1| PREDICTED: Sesamum indicum ABC transporter B family member 15-like (LOC105177189), mRNA 0.0	pfam00664, ABC_membrane, ABC transporter transmembrane region. This family represents a unit of six transmembrane helices. Many members of the ABC transporter family (pfam00005) have two such regions. 1.85465e-22	sp|Q6YUU5|MDR_ORYSJ Putative multidrug resistance protein OS=Oryza sativa subsp. japonica GN=Os02g0190300 PE=3 SV=1 0.0	tr|K4BBP8|K4BBP8_SOLLC Uncharacterized protein OS=Solanum lycopersicum PE=4 SV=1 0.0e+00	GO:0005524, ATP binding;GO:0016021, integral component of membrane;GO:0042626, ATPase activity, coupled to transmembrane movement of substances;GO:0055085, transmembrane transport	K05658-ko04976 Bile secretion;ko02010 ABC transporters
TRINITY_DN96988_c1_g4	TAGGACTTGTACTGGGGTTCTCTGTTCTCATCCTCTTTCCAGAGATATTCGTATAGAGTCTCTGTCTCTAACCTTCCATGGACATGATCTTATTGTTGATTCTGAGCTGGAGCTTAATTATGGCAGACGGTATGGTTTGCTCGGACTTAATGGCTGTGGAAAATCTACTCTACTTACCTCCATAGGGCGTCGAGAACTTCCAATTCCTGATCACATGGATATTTTTCATCTGACAAGGGAGATTGAAGCATCTGATATGTCTTCACTCCAGGCCGTGATGAACTGTGATGAGGAGAAGATAAAATTAGAGAAAGAAGCTGAAGCTTTGGCTGCTCAGGATGACGGTGGAGGAGAAGCTCTTGAGCGCATTTACGAGCGTTTGGATGCAATGGATGCAGC…	PLN03073, PLN03073, ABC transporter F family; Provisional. 1.24151e-95	KOG0927, KOG0927, KOG0927, Predicted transporter (ABC superfamily) [General function prediction only]. 7.82425e-169	gi|1021026571|gb|KZM84358.1| hypothetical protein DCAR_028348 [Daucus carota subsp. sativus] 1.9e-203	gi|590590815|ref|XM_007016780.1| Theobroma cacao ABC transporter F family member 1 (TCM_042138) mRNA, complete cds 0.0	pfam12848, ABC_tran_Xtn, ABC transporter. This domain is an extension of some members of pfam00005 and other ABC-transporter families. 1.48504e-08	sp|Q9FJH6|AB1F_ARATH ABC transporter F family member 1 OS=Arabidopsis thaliana GN=ABCF1 PE=1 SV=1 0.0	tr|A0A103XH96|A0A103XH96_CYNCS AAA+ ATPase domain-containing protein OS=Cynara cardunculus var. scolymus GN=Ccrd_007233 PE=4 SV=1 3.3e-195	GO:0005215, transporter activity;GO:0005524, ATP binding;GO:0005886, plasma membrane;GO:0016887, ATPase activity	-
TRINITY_DN96811_c2_g1	AAAAAAAGTTAGATTACTACTGTGTGCGTGTCCCCTGTAATTTTGCCTGTAAAAAATGTCCAAACCCACAATTCTATGTTGTCCACCATGAAAACATCATCAACTAAATTACTAAATGTAAATAGAAAGGTAGAGATTGATCAAAGTACAACTACTTGATGGCAACATCTTTACTACCTTTCCAAACCAAAACTCACCCTGTGTATCCCAATTTAGCAATACAATCCCCAAATAATTTAACCCCAAGAAGCAACCCCAAGTTTCAGTTTCCACCAACAATCCTCCTCAACACCAAACACAAGTGTTTCTTTAGTTCAGATGTAGTAGCTTTGAGTTACGTTTCGAAACGGAGTACCCCAAGTAATGGGGACAGGGAAGAAAATGATTTTCAGTTGGTAA…	TIGR00958, Antigen_peptide_transporter_2, Conjugate Transporter-2 (CT2) Family protein. [Transport and binding proteins, Other]. 4.31428e-73	KOG0058, KOG0058, KOG0058, Peptide exporter, ABC superfamily [Intracellular trafficking, secretion, and vesicular transport]. 6.53594e-88	gi|1021044719|gb|KZN02500.1| hypothetical protein DCAR_011254 [Daucus carota subsp. sativus] 2.8e-195	gi|955319291|ref|XM_003525390.3| PREDICTED: Glycine max ABC transporter B family member 25-like (LOC100818615), mRNA 1.50434e-11	pfam00664, ABC_membrane, ABC transporter transmembrane region. This family represents a unit of six transmembrane helices. Many members of the ABC transporter family (pfam00005) have two such regions. 4.61653e-13	sp|Q8RY46|AB26B_ARATH ABC transporter B family member 26, chloroplastic OS=Arabidopsis thaliana GN=ABCB26 PE=2 SV=1 0.0	tr|M5WYG2|M5WYG2_PRUPE Uncharacterized protein OS=Prunus persica GN=PRUPE_ppa002672mg PE=4 SV=1 4.3e-156	GO:0005215, transporter activity;GO:0005524, ATP binding;GO:0009507, chloroplast;GO:0009941, chloroplast envelope;GO:0016021, integral component of membrane;GO:0031969, chloroplast membrane;GO:0042626, ATPase activity, coupled to transmembrane movement of substances	K05656-ko02010 ABC transporters;ko04142 Lysosome
TRINITY_DN96499_c0_g1	GTGCTCTAACTCGTGATATTGAGATGTGGGCTGATGGAGATTTAAGTGTGGTGGGAGAGAGGGGTATGAACTTAAGTGGCGGACAGAAGCAAAGGATTCAGTTGGCAAGAGCAATTTACAGCGACTCAGATGTGTATTTCTTAGATGACCCTTTTAGTGCTGTGGATGCACATACAGGAGCTCATATGTTCAAGAAATGTATGATGGAATTACTAAATACGAAGACAGTTATTTATGTGACACATCAGTTGGAATTTCTTGAAGGTTCAGACCTTGTATTGGTTATGAAGAATGGTAGCATTGTTCAGTCAGGAAAGTACAAAGATTTAATTGCAGAAACTACTGGCGAACTTGTAACACAAATGGCTGCGCATAGCAAATCTCTAAATCAAGTTAAAC…	PLN03130, PLN03130, ABC transporter C family member; Provisional. 4.2691e-126	KOG0054, KOG0054, KOG0054, Multidrug resistance-associated protein/mitoxantrone resistance protein, ABC superfamily [Secondary metabolites biosynthesis, transport and catabolism]. 2.68124e-137	gi|1021029161|gb|KZM86946.1| hypothetical protein DCAR_024080 [Daucus carota subsp. sativus] 0.0e+00	gi|698508494|ref|XM_009801211.1| PREDICTED: Nicotiana sylvestris putative ABC transporter C family member 15 (LOC104245588), transcript variant X2, mRNA 0.0	pfam00005, ABC_tran, ABC transporter. ABC transporters for a large family of proteins responsible for translocation of a variety of compounds across biological membranes. ABC transporters are the largest family of proteins in many completely sequenced bacteria. ABC transporters are composed of two copies of this domain and two copies of a transmembrane domain pfam00664. These four domains may bel…	sp|Q9LK64|AB3C_ARATH ABC transporter C family member 3 OS=Arabidopsis thaliana GN=ABCC3 PE=1 SV=1 0.0	tr|B9HTC0|B9HTC0_POPTR Uncharacterized protein OS=Populus trichocarpa GN=POPTR_0010s06540g PE=4 SV=2 2.2e-272	GO:0000325, plant-type vacuole;GO:0005524, ATP binding;GO:0005773, vacuole;GO:0005774, vacuolar membrane;GO:0008559, xenobiotic transmembrane transporting ATPase activity;GO:0009506, plasmodesma;GO:0010290, chlorophyll catabolite transmembrane transporter activity;GO:0015431, glutathione S-conjugate-exporting ATPase activity;GO:0016021, integral component of membrane;GO:0042626, ATPase activity, …	K05666-ko02010 ABC transporters;ko04976 Bile secretion
TRINITY_DN96361_c1_g2	CACTTTGTGTCCAAATCTTTAAGAGGATAACCATCAATCAAAATCTGACCACTTGTTGGCTCATATAGTCGAAGCAAAAGATTCACAAGAGTGCTTTTCCCACTTCCACTTAGACCAACAATTGCAACAACTTCATTAGGATGCACCACGAGATTTATATGTTGCAGTACAGAAACCGTTTCTCTCGAAGAATAGTAAAAACAAATATCCTTAAACTCAATGCGACCATTGAGTTTTTCCAACTTCAATCCTTGATGCGTGAACTGGTCACTGGGCGAAAGGTCCATCAACTGAAACACTTTTTCACTAGCCCCAACAGATTGCATCAGCGATGACACATTGTCTCCCACCCACCAAGTTGAATAAATCAACCATTCACTGTACAGTATGAATTTTGTA…	TIGR00958, Antigen_peptide_transporter_2, Conjugate Transporter-2 (CT2) Family protein. [Transport and binding proteins, Other]. 7.29403e-52	KOG0058, KOG0058, KOG0058, Peptide exporter, ABC superfamily [Intracellular trafficking, secretion, and vesicular transport]. 3.06756e-69	gi|1021025795|gb|KZM83583.1| hypothetical protein DCAR_031152 [Daucus carota subsp. sativus] 1.8e-148	gi|731436758|ref|XM_010648461.1| PREDICTED: Vitis vinifera ABC transporter B family member 26, chloroplastic-like (LOC100249410), transcript variant X3, mRNA 1.31875e-161	pfam00664, ABC_membrane, ABC transporter transmembrane region. This family represents a unit of six transmembrane helices. Many members of the ABC transporter family (pfam00005) have two such regions. 3.26341e-14	sp|Q8RY46|AB26B_ARATH ABC transporter B family member 26, chloroplastic OS=Arabidopsis thaliana GN=ABCB26 PE=2 SV=1 5.07418e-157	tr|F6GZ17|F6GZ17_VITVI Putative uncharacterized protein OS=Vitis vinifera GN=VIT_00s0291g00100 PE=4 SV=1 2.1e-125	GO:0005215, transporter activity;GO:0005524, ATP binding;GO:0009507, chloroplast;GO:0009941, chloroplast envelope;GO:0016021, integral component of membrane;GO:0031969, chloroplast membrane;GO:0042626, ATPase activity, coupled to transmembrane movement of substances	K05656-ko02010 ABC transporters;ko04142 Lysosome
TRINITY_DN96033_c1_g1	GAATGTCGAGCTACACGTTAAGACTGTGGATGGTGTTACAGATTTTGATGCCCAGCAGGACCGAGAAACTATGGGTATAGAAGTAGAAACAATTTTTGTAAATCAGCAAACTACAATATAGTTAAAATAGATCCGCGGAAGCTTTGTCAGGGTTGTCATTAGCCCATCCAATCTCAATCCAATTTGAAGCGGAAGCAGAAGATACCTCCTCTAGTTTAAATCTCCTCAAGTTCCGAATGAACTGGTGCATCTTCCAAACCATTTTCGATATGCCCAAGCCTGTTTTGAGCAAGCCTACTCATTACAGCAAGACCTTCAACCACTCCATAAAGTGCTGACCACCAGTTATTTGCAGGAACCTGATATTTATCAAGAGCCTCATCAATGAGCTTGTCATGC…	PLN03130, PLN03130, ABC transporter C family member; Provisional. 0.0	KOG0054, KOG0054, KOG0054, Multidrug resistance-associated protein/mitoxantrone resistance protein, ABC superfamily [Secondary metabolites biosynthesis, transport and catabolism]. 5.60691e-120	gi|1021046233|gb|KZN04013.1| hypothetical protein DCAR_004811 [Daucus carota subsp. sativus] 1.8e-253	gi|731405247|ref|XM_010657404.1| PREDICTED: Vitis vinifera ABC transporter C family-like (LOC100251535), transcript variant X2, mRNA 0.0	pfam00005, ABC_tran, ABC transporter. ABC transporters for a large family of proteins responsible for translocation of a variety of compounds across biological membranes. ABC transporters are the largest family of proteins in many completely sequenced bacteria. ABC transporters are composed of two copies of this domain and two copies of a transmembrane domain pfam00664. These four domains may bel…	sp|Q42093|AB2C_ARATH ABC transporter C family member 2 OS=Arabidopsis thaliana GN=ABCC2 PE=1 SV=2 0.0	tr|A0A061DVW6|A0A061DVW6_THECC Multidrug resistance-associated protein 2 isoform 1 OS=Theobroma cacao GN=TCM_006080 PE=4 SV=1 6.9e-197	GO:0000325, plant-type vacuole;GO:0005524, ATP binding;GO:0005773, vacuole;GO:0005774, vacuolar membrane;GO:0008559, xenobiotic transmembrane transporting ATPase activity;GO:0016021, integral component of membrane;GO:0042626, ATPase activity, coupled to transmembrane movement of substances;GO:1902417, (+)-abscisic acid D-glucopyranosyl ester transmembrane transporter activity;GO:1902418, (+)-absc…	-
TRINITY_DN96014_c1_g1	GTTTTCACAAATTATGAAAAAAATTGATAAACTTTTTATGACAGATATAAGTCTAACCTTCAATTTCAAAGTACTTGCATCAATCTCTTACAGTATTAACTTTCAATATATAATAAAACACTTATCAAATTTTTACATGTTCTTTTTGCCGCAACAATCTTAATTGTTCCTCCTAATTAAGAAACAAATTTTAGAAATATGACGTAAGCAATTCAATATTTAAGGGTAGAGGGTAATCCAACTGACTTCATGTGAAATCTTTTGACATAAAGTAATCTAGACTTTACAATATCACATGCGCTAGCTAGCTCTTTCTACATAGAGCTAGCACAAGCCCCCTGCATAGTGATCAAACAACATCAGTTTGTGTTGCATATAGAGCTACTTAAGTAGAAGTTC…	PLN03211, PLN03211, ABC transporter G-25; Provisional. 3.4033e-106	KOG0061, KOG0061, KOG0061, Transporter, ABC superfamily (Breast cancer resistance protein) [Secondary metabolites biosynthesis, transport and catabolism]. 7.30206e-68	gi|1021034172|gb|KZM91956.1| hypothetical protein DCAR_020679 [Daucus carota subsp. sativus] 5.8e-266	gi|566209071|ref|XM_006373755.1| Populus trichocarpa hypothetical protein (POPTR_0016s06620g) mRNA, complete cds 0.0	pfam00005, ABC_tran, ABC transporter. ABC transporters for a large family of proteins responsible for translocation of a variety of compounds across biological membranes. ABC transporters are the largest family of proteins in many completely sequenced bacteria. ABC transporters are composed of two copies of this domain and two copies of a transmembrane domain pfam00664. These four domains may bel…	sp|Q93YS4|AB22G_ARATH ABC transporter G family member 22 OS=Arabidopsis thaliana GN=ABCG22 PE=1 SV=1 0.0	tr|A0A103XGX3|A0A103XGX3_CYNCS AAA+ ATPase domain-containing protein OS=Cynara cardunculus var. scolymus GN=Ccrd_007427 PE=4 SV=1 2.5e-213	GO:0005524, ATP binding;GO:0005886, plasma membrane;GO:0009414, response to water deprivation;GO:0010148, transpiration;GO:0016021, integral component of membrane;GO:0016887, ATPase activity;GO:0042626, ATPase activity, coupled to transmembrane movement of substances	-
TRINITY_DN95710_c3_g1	GTCTGTTCTAGTCAACACCCAAATTTAGTTTACAGGTAGTATTCCCTTTCATTGTTGCCCCTGTTCTCATCAACCATCACTTTCCTTCCCCTGTTCCTGTGTTTTCACACCGCTACTTCTACAGTACCACTAAAGTACACACACCCCCGGTAAAAACACAAGTAAATAAACAAACCCAACTGCAGATACAGCCTATACTTACACAACACACACATATATATACATGAACTAAGCCAGTCTAGTTAGTTTAACAAACCATCTTAAAAAAAATGGCCCAAGATCCTGAAGAAGAGAGAAAGACTAGTTTTACTAGCCCAAGAATTAGCATATCAGCAAAAAGAAAATTCTATGAGTTTCTTGGGCTTGAGCTGCCTGTTGTAGTTTCTGAACAAGATGAAC…	cd03249, ABC_MTABC3_MDL1_MDL2, ATP-binding cassette domain of a mitochondrial protein MTABC3 and related proteins. MTABC3 (also known as ABCB6) is a mitochondrial ATP-binding cassette protein involved in iron homeostasis and one of four ABC transporters expressed in the mitochondrial inner membrane, the other three being MDL1(ABC7), MDL2, and ATM1. In fact, the yeast MDL1 (multidrug resistance-li…	KOG0055, KOG0055, KOG0055, Multidrug/pheromone exporter, ABC superfamily [Secondary metabolites biosynthesis, transport and catabolism]. 0.0	gi|1021036652|gb|KZM94435.1| hypothetical protein DCAR_017678 [Daucus carota subsp. sativus] 0.0e+00	gi|590630928|ref|XM_007027357.1| Theobroma cacao ATP binding cassette subfamily B1 isoform 1 (TCM_022244) mRNA, complete cds 0.0	pfam00664, ABC_membrane, ABC transporter transmembrane region. This family represents a unit of six transmembrane helices. Many members of the ABC transporter family (pfam00005) have two such regions. 2.45832e-29	sp|Q9ZR72|AB1B_ARATH ABC transporter B family member 1 OS=Arabidopsis thaliana GN=ABCB1 PE=1 SV=1 0.0	tr|A0A103YI66|A0A103YI66_CYNCS AAA+ ATPase domain-containing protein OS=Cynara cardunculus var. scolymus GN=Ccrd_012122 PE=4 SV=1 0.0e+00	GO:0005524, ATP binding;GO:0005886, plasma membrane;GO:0008361, regulation of cell size;GO:0009506, plasmodesma;GO:0009624, response to nematode;GO:0009637, response to blue light;GO:0009639, response to red or far red light;GO:0009640, photomorphogenesis;GO:0009733, response to auxin;GO:0009734, auxin-activated signaling pathway;GO:0009926, auxin polar transport;GO:0009958, positive gravitropism…	K05658-ko04976 Bile secretion;ko02010 ABC transporters
TRINITY_DN95608_c1_g1	TTGGGGTTTGGCTCTGTTTAGTGTTGTTATTTGTTTATTGAATAACTTTTATTGGTATAGAAATGGGTGGTCTGATGTTAAGGTTTTAGTTGTTTTTGATTCAGTGAGTAAAGGGCTAACTTGGTTGGTTGTTTCAGTTTATGTTAGTACCCAATTGAAACATAGAGGTTATGTTAAGTACCCTTTAGTGCTGAGGGTCTGGTGGTGTTTTTATTTTTCGATTTCTTGTTATTGTCTTGTTCTTGATTTTGTTTTGTATGAAAACTTGTTGGTGTCTTTACAACTACAATTTGTGGTTTGTGATGCATTATATGTAGTTACAGGGTTGTTTTTGTGTTTTGTGGGGCTTATGGGTAGAAGTGAGGCTAGTGAAAATGGAATTGGAAATGGAAATGACCT…	PLN03232, PLN03232, ABC transporter C family member; Provisional. 4.07799e-156	KOG0054, KOG0054, KOG0054, Multidrug resistance-associated protein/mitoxantrone resistance protein, ABC superfamily [Secondary metabolites biosynthesis, transport and catabolism]. 0.0	gi|1021041641|gb|KZM99422.1| hypothetical protein DCAR_013216 [Daucus carota subsp. sativus] 0.0e+00	gi|568842365|ref|XM_006475057.1| PREDICTED: Citrus sinensis ABC transporter C family member 3-like (LOC102621957), mRNA 0.0	pfam00005, ABC_tran, ABC transporter. ABC transporters for a large family of proteins responsible for translocation of a variety of compounds across biological membranes. ABC transporters are the largest family of proteins in many completely sequenced bacteria. ABC transporters are composed of two copies of this domain and two copies of a transmembrane domain pfam00664. These four domains may bel…	sp|Q9LK64|AB3C_ARATH ABC transporter C family member 3 OS=Arabidopsis thaliana GN=ABCC3 PE=1 SV=1 0.0	tr|F6I530|F6I530_VITVI Putative uncharacterized protein OS=Vitis vinifera GN=VIT_19s0015g00050 PE=4 SV=1 0.0e+00	GO:0000325, plant-type vacuole;GO:0005524, ATP binding;GO:0005773, vacuole;GO:0005774, vacuolar membrane;GO:0008559, xenobiotic transmembrane transporting ATPase activity;GO:0009506, plasmodesma;GO:0010290, chlorophyll catabolite transmembrane transporter activity;GO:0015431, glutathione S-conjugate-exporting ATPase activity;GO:0016021, integral component of membrane;GO:0042626, ATPase activity, …	K05666-ko02010 ABC transporters;ko04976 Bile secretion
TRINITY_DN94728_c2_g1	GATCAAAGGATAAGAAAGGAAAGTCACTGTACAATCACAAAGTCTACTTATATTAGTCTACGCTGCCTCATACCCTTTCCAAAGTGAGGCTGCATTAACCGAACATACAATCCATTCTTCGCCATCAACATATCATGGCTCCCTTCCTCAACAATCCGTCCTCCGTTCAGTACAACGATGTTGTCAACATGTCTCATCATAGCTGCTCTATGTGCTATGAGAATGGTGGTTTTGTTACCCATGACTAGTGTATCAAGTGCCTCCTGAACAACTCGGCTTGACTCGGACTCGATAGATGAGCTTGCCTCATCCAATAACAAAATGGGAGCATTCTTTAACACAACACGAGCAATTGCAATTCTTTGTTTCTGTCCGGGGGTCAGATCCACGCCTCTCATC…	cd03249, ABC_MTABC3_MDL1_MDL2, ATP-binding cassette domain of a mitochondrial protein MTABC3 and related proteins. MTABC3 (also known as ABCB6) is a mitochondrial ATP-binding cassette protein involved in iron homeostasis and one of four ABC transporters expressed in the mitochondrial inner membrane, the other three being MDL1(ABC7), MDL2, and ATM1. In fact, the yeast MDL1 (multidrug resistance-li…	KOG0055, KOG0055, KOG0055, Multidrug/pheromone exporter, ABC superfamily [Secondary metabolites biosynthesis, transport and catabolism]. 1.52726e-157	gi|1021039642|gb|KZM97423.1| hypothetical protein DCAR_015215 [Daucus carota subsp. sativus] 0.0e+00	gi|802672861|ref|XM_012226171.1| PREDICTED: Jatropha curcas ABC transporter B family member 20 (LOC105641586), mRNA 0.0	pfam00664, ABC_membrane, ABC transporter transmembrane region. This family represents a unit of six transmembrane helices. Many members of the ABC transporter family (pfam00005) have two such regions. 5.52519e-20	sp|Q9M3B9|AB20B_ARATH ABC transporter B family member 20 OS=Arabidopsis thaliana GN=ABCB20 PE=1 SV=1 0.0	tr|A0A097P9R0|A0A097P9R0_HEVBR ABC transporter family protein OS=Hevea brasiliensis GN=ABCB20 PE=2 SV=1 0.0e+00	GO:0005524, ATP binding;GO:0005634, nucleus;GO:0005886, plasma membrane;GO:0016021, integral component of membrane;GO:0042626, ATPase activity, coupled to transmembrane movement of substances	K05658-ko04976 Bile secretion;ko02010 ABC transporters
TRINITY_DN94634_c1_g6	TACTTTAACCACGTTAGTGAAAATATATGTGACCCACACAAAAGAGTTTTAATTTTATGAATTTCCAAATGTATCATACATCTCAATGCAGAAAGTTGCTACCAACTTTGGTATCTAAGGGTAACAAATTTTTTTACTAAAGCAGTTCCATTATGTATGTGTTCTGTCATATTACTATAAAAACTCCACGGGTTTGGCACACAACACAAGATGATTGGACCAGCAAATAATATCCTAAGACTGGAGCAATTTTTTGTAATCCTGGAATGTCCCGTCAAAAGGTGTCACCCTGCCTTCAGATACAGCCCACAGCTGATCAACACTTCCAGATATCAGATGTTCATCGTGACTTACCATAAGAACTCCTCCTTGGAACAAAACAAGACCCTGGATCAATGC…	PLN03073, PLN03073, ABC transporter F family; Provisional. 0.0	KOG0062, KOG0062, KOG0062, ATPase component of ABC transporters with duplicated ATPase domains/Translation elongation factor EF-3b [Amino acid transport and metabolism, Translation, ribosomal structure and biogenesis]. 1.40494e-163	gi|1021024466|gb|KZM82254.1| hypothetical protein DCAR_029862 [Daucus carota subsp. sativus] 0.0e+00	gi|731378673|ref|XM_002263143.3| PREDICTED: Vitis vinifera ABC transporter F family member 3 (LOC100256523), mRNA 0.0	pfam12848, ABC_tran_Xtn, ABC transporter. This domain is an extension of some members of pfam00005 and other ABC-transporter families. 2.38248e-16	sp|Q8H0V6|AB3F_ARATH ABC transporter F family member 3 OS=Arabidopsis thaliana GN=ABCF3 PE=1 SV=1 0.0	tr|D7TVM3|D7TVM3_VITVI Putative uncharacterized protein OS=Vitis vinifera GN=VIT_02s0025g02160 PE=4 SV=1 0.0e+00	GO:0005215, transporter activity;GO:0005524, ATP binding;GO:0005829, cytosol;GO:0016887, ATPase activity;GO:0042742, defense response to bacterium;GO:0046686, response to cadmium ion	-
TRINITY_DN94618_c0_g1	TGTTACTTGTCCGGTGGTAATGAATGATGCATTGAAAAAAATTATTTAGTCACTATTTTACTTGTCCCATTTTCATGTGTTAGTAATTCTACATATTATGGTAATGGTAACTTTTAGACATTCAAAAGCCTATTCTGAAAATGTCCCAACATGGAGAAATACACACTTCTCTTGTTGTAAAGTATATTCGTAGTAAAATTCAGAACTTAAATTTTTTTTAGGGGAAAAAGATGAAAATAAAGCATGCGAACTTGGCGTAACTCAGGTAACTTGTCAATGAATGTTGCAGCATTGGCAATTAGCTCAATAGCCGTTCTAATCTCTTCTTCAGTAGCATTTTCCTTTCCATATGCAATATTTGATTTAATGCTAGTTGCAAACAGAATAGGTTCTTGACTC…	cd03249, ABC_MTABC3_MDL1_MDL2, ATP-binding cassette domain of a mitochondrial protein MTABC3 and related proteins. MTABC3 (also known as ABCB6) is a mitochondrial ATP-binding cassette protein involved in iron homeostasis and one of four ABC transporters expressed in the mitochondrial inner membrane, the other three being MDL1(ABC7), MDL2, and ATM1. In fact, the yeast MDL1 (multidrug resistance-li…	KOG0055, KOG0055, KOG0055, Multidrug/pheromone exporter, ABC superfamily [Secondary metabolites biosynthesis, transport and catabolism]. 3.05142e-52	gi|147796332|emb|CAN77320.1| hypothetical protein VITISV_009891 [Vitis vinifera] 3.3e-85	gi|764638986|ref|XM_004308458.2| PREDICTED: Fragaria vesca subsp. vesca ABC transporter B family member 9-like (LOC101292750), mRNA 8.42518e-66	pfam00005, ABC_tran, ABC transporter. ABC transporters for a large family of proteins responsible for translocation of a variety of compounds across biological membranes. ABC transporters are the largest family of proteins in many completely sequenced bacteria. ABC transporters are composed of two copies of this domain and two copies of a transmembrane domain pfam00664. These four domains may bel…	sp|Q9FHF1|AB7B_ARATH ABC transporter B family member 7 OS=Arabidopsis thaliana GN=ABCB7 PE=3 SV=1 9.33873e-78	tr|F6HMG1|F6HMG1_VITVI Putative uncharacterized protein OS=Vitis vinifera GN=VIT_10s0003g02550 PE=4 SV=1 1.9e-85	GO:0005524, ATP binding;GO:0005886, plasma membrane;GO:0016021, integral component of membrane;GO:0042626, ATPase activity, coupled to transmembrane movement of substances;GO:0055085, transmembrane transport	-
TRINITY_DN94350_c2_g4	GCAATTGTGAGTTCGGATCGATGTAAGCCTAAAAAGTGCAGGCAAGAATGCAAGAAGAGCTGTCCTGTTGTCAAGACTGGTAAACTTTGTATTGAAGTAACGTCCGCAGCCAAAATTGCTTATATATCTGAGGAGTTGTGCATTGGGTGCGGAATATGCGTTAAGAAATGCCCTTTTGAGGCAATTCAGATCATTAATCTTCCTAAAGATTTGGACAAAGACACAACTCACCGTTATGGCCCCAACACTTTCAAGCTACATAGGCTACCCGTTCCAAGGCCGGGGCAAGTTCTTGGCTTGGTTGGGACAAATGGTATTGGAAAGTCTACAGCTCTCAAAGTTTTAGCAGGGAAATTGAAGCCCAATCTTGGCCGTTTCAATAACCCTCCTGATTGGCAG…	COG1245, COG1245, Predicted ATPase, RNase L inhibitor (RLI) homolog [General function prediction only]. 8.27467e-161	KOG0063, KOG0063, KOG0063, RNAse L inhibitor, ABC superfamily [RNA processing and modification]. 0.0	gi|1021037982|gb|KZM95765.1| hypothetical protein DCAR_019007 [Daucus carota subsp. sativus] 3.4e-222	gi|778692687|ref|XM_011655204.1| PREDICTED: Cucumis sativus ABC transporter E family member 2 (LOC101214910), transcript variant X2, mRNA 0.0	pfam00005, ABC_tran, ABC transporter. ABC transporters for a large family of proteins responsible for translocation of a variety of compounds across biological membranes. ABC transporters are the largest family of proteins in many completely sequenced bacteria. ABC transporters are composed of two copies of this domain and two copies of a transmembrane domain pfam00664. These four domains may bel…	sp|Q8LPJ4|AB2E_ARATH ABC transporter E family member 2 OS=Arabidopsis thaliana GN=ABCE2 PE=2 SV=1 0.0	tr|A0A0A0KWQ2|A0A0A0KWQ2_CUCSA Uncharacterized protein OS=Cucumis sativus GN=Csa_4G252930 PE=4 SV=1 9.2e-220	GO:0005215, transporter activity;GO:0005524, ATP binding;GO:0016020, membrane;GO:0016887, ATPase activity;GO:0046872, metal ion binding;GO:0051539, 4 iron, 4 sulfur cluster binding	-
TRINITY_DN94186_c1_g3	GTCCAGAAGGGATACCAATCTAAGATTATGGAAGCGAAGGATGATCGAATGAAATCTACTTCAGAAATTCTTCGAAACATGAAGACTCTGAAACTTCAAGCATGGGACAGTCATTATCTTCTAAAGCTAGAAAGCCTCAGGAAAACAGAGTACAAATGGCTTTGGAAGTCGCTTAGGCTACAGGCTATAACGGCCTTTATATTTTGGGGATCACCAACATTCATTTCTGTTTTAACTTTTGGAGGATGTATTCTTATGGGGATTCCACTTACATCTGGGAGAGTGTTATCTGCATTGGCTACATTTAGAATGTTACAAGATCCTATCTTTAACCTGCCTGATCTCCTGTCCGTGATTGCACAGGGAAAAGTTTCTGCAGATAGAATTGCTTCATACCTC…	TIGR00957, Multidrug_resistance-associated_protein_1, multi drug resistance-associated protein (MRP). This model describes multi drug resistance-associated protein (MRP) in eukaryotes. The multidrug resistance-associated protein is an integral membrane protein that causes multidrug resistance when overexpressed in mammalian cells. It belongs to ABC transporter superfamily. The protein topology an…	KOG0054, KOG0054, KOG0054, Multidrug resistance-associated protein/mitoxantrone resistance protein, ABC superfamily [Secondary metabolites biosynthesis, transport and catabolism]. 0.0	gi|1021050935|gb|KZN08713.1| hypothetical protein DCAR_001369 [Daucus carota subsp. sativus] 0.0e+00	gi|590561118|ref|XM_007008659.1| Theobroma cacao Multidrug resistance protein ABC transporter family (TCM_042344) mRNA, complete cds 0.0	pfam00664, ABC_membrane, ABC transporter transmembrane region. This family represents a unit of six transmembrane helices. Many members of the ABC transporter family (pfam00005) have two such regions. 2.60391e-11	sp|Q9M1C7|AB9C_ARATH ABC transporter C family member 9 OS=Arabidopsis thaliana GN=ABCC9 PE=2 SV=2 0.0	tr|A0A068UM35|A0A068UM35_COFCA Uncharacterized protein OS=Coffea canephora GN=GSCOC_T00028689001 PE=4 SV=1 0.0e+00	GO:0005524, ATP binding;GO:0008559, xenobiotic transmembrane transporting ATPase activity;GO:0016021, integral component of membrane;GO:0042626, ATPase activity, coupled to transmembrane movement of substances	-
TRINITY_DN94176_c0_g1	TTATGTAATGTTTAGCATTCATCATAAAAGAAATTCTTGGTACAGCTTAGTTAACTGTTTTTGTAATACATTGTAAAATGATACATTCTATACTTCATCGTCTAACAGACACCATTTTATCACAAACATTAATAATGGTGTCATGTTGGTATGCCTGCCAGACAATTTTCGTCGTCATCGAAGGACATGTTGAAAACTTCAGCATGTATCTGAGAAATCATTCAGCACCACTATGCATGGCTATTGTAGTTCATGACTGATGTTGTACTATGAAGGGACCGTCATTGAGTTTTACTAGCTACTTTGCTAAGCTACTGAAACTTTGTGAACTCATGGAGTACTCTCTAATGAGCTTTGAGAAGAATGAATCCTCCCTCTCTAGCAGCCTTGCTGGAGTGT…	cd03288, ABCC_SUR2, ATP-binding cassette domain 2 of the sulfonylurea receptor SUR. The SUR domain 2. The sulfonylurea receptor SUR is an ATP binding cassette (ABC) protein of the ABCC/MRP family. Unlike other ABC proteins, it has no intrinsic transport function, neither active nor passive, but associates with the potassium channel proteins Kir6.1 or Kir6.2 to form the ATP-sensitive potassium (K(…	KOG0054, KOG0054, KOG0054, Multidrug resistance-associated protein/mitoxantrone resistance protein, ABC superfamily [Secondary metabolites biosynthesis, transport and catabolism]. 1.55334e-37	gi|1021050935|gb|KZN08713.1| hypothetical protein DCAR_001369 [Daucus carota subsp. sativus] 6.2e-56	gi|590561118|ref|XM_007008659.1| Theobroma cacao Multidrug resistance protein ABC transporter family (TCM_042344) mRNA, complete cds 2.04928e-72	pfam00005, ABC_tran, ABC transporter. ABC transporters for a large family of proteins responsible for translocation of a variety of compounds across biological membranes. ABC transporters are the largest family of proteins in many completely sequenced bacteria. ABC transporters are composed of two copies of this domain and two copies of a transmembrane domain pfam00664. These four domains may bel…	sp|Q7FB56|AB15C_ARATH Putative ABC transporter C family member 15 OS=Arabidopsis thaliana GN=ABCC15 PE=5 SV=2 3.58754e-55	tr|A0A068UM35|A0A068UM35_COFCA Uncharacterized protein OS=Coffea canephora GN=GSCOC_T00028689001 PE=4 SV=1 1.1e-52	GO:0005524, ATP binding;GO:0008559, xenobiotic transmembrane transporting ATPase activity;GO:0016021, integral component of membrane;GO:0042626, ATPase activity, coupled to transmembrane movement of substances	-
TRINITY_DN93904_c1_g1	AAGTGGAGTCCTGCCCTCCAAATTCGCACAGTGTTGTTGAGCATCCAAGCACTTCTTAGTGCTCCAAACCCAGATGATCCTCTTTCTGAGAATGTTGCTAAGCACTGGAAATCTAATGAAATTGAAGCGGTTGAAACAGGTAATAGTCAAGTCAAAGTTACTCGATGAAAGTTCTATTTTGCAATATATTTATGTTCTTGATATATAATGTTTCTGTCACTGAGAACTTGCAGCCAAAGAATGGAGTCGACTGTATGCAACTGGGGAGTGACGTGGGGATATGCTAGTTGCGGCTATCAGTTCTGCTAATTTCCTGCTAATTACTTTAGCTGAATGGTTCCATTTGGTTATTTGTTAAAATATGAAAACAATTGTACAAACTATCGTGAATCACTTTTT…	TIGR00955, Protein_white, The Eye Pigment Precursor Transporter (EPP) Family protein. [Transport and binding proteins, Other]. 1.41609e-74	KOG0061, KOG0061, KOG0061, Transporter, ABC superfamily (Breast cancer resistance protein) [Secondary metabolites biosynthesis, transport and catabolism]. 3.27656e-90	gi|1021043235|gb|KZN01016.1| hypothetical protein DCAR_009770 [Daucus carota subsp. sativus] 1.3e-296	gi|731408970|ref|XM_002276386.2| PREDICTED: Vitis vinifera ABC transporter G family member 10 (LOC100267668), mRNA 7.52251e-170	pfam00005, ABC_tran, ABC transporter. ABC transporters for a large family of proteins responsible for translocation of a variety of compounds across biological membranes. ABC transporters are the largest family of proteins in many completely sequenced bacteria. ABC transporters are composed of two copies of this domain and two copies of a transmembrane domain pfam00664. These four domains may bel…	sp|Q9MAH4|AB10G_ARATH ABC transporter G family member 10 OS=Arabidopsis thaliana GN=ABCG10 PE=3 SV=1 0.0	tr|A5B0P5|A5B0P5_VITVI Putative uncharacterized protein OS=Vitis vinifera GN=VITISV_020682 PE=4 SV=1 3.2e-202	GO:0005524, ATP binding;GO:0005886, plasma membrane;GO:0016021, integral component of membrane;GO:0016887, ATPase activity;GO:0042626, ATPase activity, coupled to transmembrane movement of substances	-
TRINITY_DN93793_c2_g4	AAAATTATTAAGTTGTCCATATCTTTTAGAACTAAATGCACTCCTAAAAGCAATCTTGTTACATTACACACATATATATATAGAGCAATCTTATTACTTGTGTATTGAGAGGTTTGAAGATCAAGAAAGATCAAGAATCAAATGGGAAACACAAACAAGAAATCGGGGTCTATCCTGTCAATTTTCATGTATGCTGACGCTTTAGATATGTTATTGATGATTCTGGGTTTCCTCGGAGCAGTTGGTGATGGCCTCTCCACCCCTGCCATGTTATTTGTAACTAGCAAGCTTATGAACAATGTTGGCAGTACCATTTCTTCTCAGACCAATGATCACGATTTTACTCATGATATCAACCAGAATGCCTTGGCTTTGTGTTACTTGGCTTCTGCTCAATGG…	pfam00664, ABC_membrane, ABC transporter transmembrane region. This family represents a unit of six transmembrane helices. Many members of the ABC transporter family (pfam00005) have two such regions. 1.45114e-23	KOG0055, KOG0055, KOG0055, Multidrug/pheromone exporter, ABC superfamily [Secondary metabolites biosynthesis, transport and catabolism]. 8.17999e-56	gi|1021044645|gb|KZN02426.1| hypothetical protein DCAR_011180 [Daucus carota subsp. sativus] 5.1e-98	-	pfam00664, ABC_membrane, ABC transporter transmembrane region. This family represents a unit of six transmembrane helices. Many members of the ABC transporter family (pfam00005) have two such regions. 3.4669e-24	sp|Q9LHD1|AB15B_ARATH ABC transporter B family member 15 OS=Arabidopsis thaliana GN=ABCB15 PE=3 SV=1 1.83039e-102	tr|K4BBP8|K4BBP8_SOLLC Uncharacterized protein OS=Solanum lycopersicum PE=4 SV=1 6.9e-95	GO:0005524, ATP binding;GO:0005886, plasma membrane;GO:0016021, integral component of membrane;GO:0042626, ATPase activity, coupled to transmembrane movement of substances;GO:0055085, transmembrane transport	-
TRINITY_DN92803_c1_g2	CTTGGATGATCCATTCAGTGCCGTGGATGCACATACTGCCAGCAGTTTATTTAATGAATATGTAATGGATGCTCTCTCAGGGAAGACAGTCTTGCTTGTGACTCACCAAGTTGATTTCCTTCCTGCATTTGATTCTGTTCTGTTGATGTCAGACGGGGAAATTTTGCATGCTGCTCCTTACCATCTATTAATGGCATCAAGCAGAGATTTCGAGAATTTGGTCAATGCACATAAAAAAACTGCTGGTTCAGAGAGGCCTGCAGAGATAAATCCTTCCCAGGAGCGTAAGATTGTTTCTGGAGATGCAAGGACTTTGCCCGAGAGGAAATCTAAAGCATTAGGAGATGATCAACTAATTAAGCAAGAGGAACGTGAAGTTGGAGATGCTGGCCTGAAACC…	TIGR00957, Multidrug_resistance-associated_protein_1, multi drug resistance-associated protein (MRP). This model describes multi drug resistance-associated protein (MRP) in eukaryotes. The multidrug resistance-associated protein is an integral membrane protein that causes multidrug resistance when overexpressed in mammalian cells. It belongs to ABC transporter superfamily. The protein topology an…	KOG0054, KOG0054, KOG0054, Multidrug resistance-associated protein/mitoxantrone resistance protein, ABC superfamily [Secondary metabolites biosynthesis, transport and catabolism]. 0.0	gi|1021044104|gb|KZN01885.1| hypothetical protein DCAR_010639 [Daucus carota subsp. sativus] 0.0e+00	gi|1025333752|ref|XM_016656239.1| PREDICTED: Nicotiana tabacum ABC transporter C family member 10-like (LOC107828853), mRNA 0.0	pfam00005, ABC_tran, ABC transporter. ABC transporters for a large family of proteins responsible for translocation of a variety of compounds across biological membranes. ABC transporters are the largest family of proteins in many completely sequenced bacteria. ABC transporters are composed of two copies of this domain and two copies of a transmembrane domain pfam00664. These four domains may bel…	sp|Q9LYS2|AB10C_ARATH ABC transporter C family member 10 OS=Arabidopsis thaliana GN=ABCC10 PE=2 SV=2 0.0	tr|V4S922|V4S922_9ROSI Uncharacterized protein OS=Citrus clementina GN=CICLE_v10004145mg PE=4 SV=1 1.3e-303	GO:0005524, ATP binding;GO:0005774, vacuolar membrane;GO:0008559, xenobiotic transmembrane transporting ATPase activity;GO:0016021, integral component of membrane;GO:0042626, ATPase activity, coupled to transmembrane movement of substances	K05666-ko02010 ABC transporters;ko04976 Bile secretion
TRINITY_DN92696_c0_g1	CTCGTGTAAGAAACAGAGAGTGCGCATGGAGTCTACAGTTAAGGTTCCTAGATGGAGTCCTGTTGGAAGCCCAACAAGAACACTTCTGTTAGAGTTCATGTCAGATGATCAAAAAGATGCGGAGGAGGTAAATGTAACTCCTCCTCCGCATCAGGAACATATTTACAACAATCCGTATCCTAGTAATGACACTAGTAGTCTTAATACCTTTCCATTTACCCCTTCTGCAACTCTTGTGCCACAGGCACAGTTGCCTCAGATTACGAATGCAAGTCGCCATGAAGCACCCTCGCTACGACAGTATGATCACAAAAGATCATGTAAAAATAGATCATCATCAAGAGTATCGGATATCGAACGAGTGCAGAGTGCACCTAGAGATGATGGCACCAGAATTTA…	TIGR00955, Protein_white, The Eye Pigment Precursor Transporter (EPP) Family protein. [Transport and binding proteins, Other]. 4.82523e-63	KOG0061, KOG0061, KOG0061, Transporter, ABC superfamily (Breast cancer resistance protein) [Secondary metabolites biosynthesis, transport and catabolism]. 6.95139e-72	gi|697180254|ref|XP_009599105.1| PREDICTED: ABC transporter G family member 11-like, partial [Nicotiana tomentosiformis] 1.2e-171	gi|731438523|ref|XM_003635390.2| PREDICTED: Vitis vinifera ABC transporter G family member 11-like (LOC100852871), mRNA 1.179e-131	pfam00005, ABC_tran, ABC transporter. ABC transporters for a large family of proteins responsible for translocation of a variety of compounds across biological membranes. ABC transporters are the largest family of proteins in many completely sequenced bacteria. ABC transporters are composed of two copies of this domain and two copies of a transmembrane domain pfam00664. These four domains may bel…	sp|Q8RXN0|AB11G_ARATH ABC transporter G family member 11 OS=Arabidopsis thaliana GN=ABCG11 PE=1 SV=1 1.27039e-170	tr|B9T0A5|B9T0A5_RICCO ATP-binding cassette transporter, putative OS=Ricinus communis GN=RCOM_0768320 PE=4 SV=1 2.3e-167	GO:0005524, ATP binding;GO:0005886, plasma membrane;GO:0009611, response to wounding;GO:0009651, response to salt stress;GO:0009737, response to abscisic acid;GO:0009897, external side of plasma membrane;GO:0010222, stem vascular tissue pattern formation;GO:0010588, cotyledon vascular tissue pattern formation;GO:0015245, fatty acid transmembrane transporter activity;GO:0015416, ATPase-coupled org…	-
TRINITY_DN92578_c0_g1	GTGTTCTGTCTGATCATTCTACATTTTTTACTGTCCTATACTTACAAACTACATATATGCCTCTTCATGTACTGTACATCTCTATTTTTATACTTACACACATGTTTATATATAATATTTTATGCTTCCCACTCATATTGACTACTTTTCAGCCCCTGAACAGCTCACCACAGCACACAATTTCATTAATGTTTACTTTAATCATCCTTCATTTTGATGAAATTAGTTGTTGAAGTTGCGTTAGATTTGTTAAAATTTGTGTAGTAATGTTATTCGAGATAGTGCTGTAAACGGGATATACTGGTTACGTTTGGTTGTATAGTAATGTCATCTAGAGGTGTGTTTGGATGGGGACAACCGGATTTGATTCCCTTAACGCCGGTATCGGAGGTGTCGGAG…	cd03249, ABC_MTABC3_MDL1_MDL2, ATP-binding cassette domain of a mitochondrial protein MTABC3 and related proteins. MTABC3 (also known as ABCB6) is a mitochondrial ATP-binding cassette protein involved in iron homeostasis and one of four ABC transporters expressed in the mitochondrial inner membrane, the other three being MDL1(ABC7), MDL2, and ATM1. In fact, the yeast MDL1 (multidrug resistance-li…	KOG0055, KOG0055, KOG0055, Multidrug/pheromone exporter, ABC superfamily [Secondary metabolites biosynthesis, transport and catabolism]. 3.83687e-126	gi|1021047389|gb|KZN05169.1| hypothetical protein DCAR_006006 [Daucus carota subsp. sativus] 2.9e-213	gi|731392341|ref|XR_785967.1| PREDICTED: Vitis vinifera ABC transporter B family member 20-like (LOC100267249), transcript variant X3, misc_RNA 0.0	pfam00664, ABC_membrane, ABC transporter transmembrane region. This family represents a unit of six transmembrane helices. Many members of the ABC transporter family (pfam00005) have two such regions. 1.54053e-22	sp|Q9M3B9|AB20B_ARATH ABC transporter B family member 20 OS=Arabidopsis thaliana GN=ABCB20 PE=1 SV=1 0.0	tr|A0A068TXE6|A0A068TXE6_COFCA Uncharacterized protein OS=Coffea canephora GN=GSCOC_T00029798001 PE=4 SV=1 7.1e-172	GO:0005524, ATP binding;GO:0005634, nucleus;GO:0005886, plasma membrane;GO:0016021, integral component of membrane;GO:0042626, ATPase activity, coupled to transmembrane movement of substances	K05658-ko04976 Bile secretion;ko02010 ABC transporters
TRINITY_DN92452_c4_g1	GTTCATACGTAAACTTCTTTGCATATTTTTCATCAAGGGCAAGCCGCATATAGTATGTGCAAAGCAACTGTGAGCATTGCGTCTACACGCAAGAGCCAAGACAATTATATAGTACAGTCCGAATGTTTTTTACAAGAAATATAGTAATTACCAGAATTTACATTGCTCACTGACTCACTCTATGTTTAATTGAACTACTGCCATCACTCCAAGTGGGTCCTGAAATTGGGTGCAGATATTTAACCAATAAATGGTTAAAATCACAATGGTTCGTCAGATAATTAATTTGAACTTTTGAGGGGAAGAAACACTAATATAGTATATCCCCGTCGTATATGTTGCAAACACTGAACAAACAAAAAAAAGGGACTATGTCTCCAGTTTAACAGCAATATCAGC…	COG5265, ATM1, ABC-type transport system involved in Fe-S cluster assembly, permease and ATPase components [Posttranslational modification, protein turnover, chaperones]. 8.88762e-171	KOG0057, KOG0057, KOG0057, Mitochondrial Fe/S cluster exporter, ABC superfamily [Intracellular trafficking, secretion, and vesicular transport]. 0.0	gi|1021037563|gb|KZM95346.1| hypothetical protein DCAR_018588 [Daucus carota subsp. sativus] 0.0e+00	gi|802540683|ref|XM_012222387.1| PREDICTED: Jatropha curcas ABC transporter B family member 25, mitochondrial (LOC105638563), mRNA 0.0	pfam00005, ABC_tran, ABC transporter. ABC transporters for a large family of proteins responsible for translocation of a variety of compounds across biological membranes. ABC transporters are the largest family of proteins in many completely sequenced bacteria. ABC transporters are composed of two copies of this domain and two copies of a transmembrane domain pfam00664. These four domains may bel…	sp|Q9LVM1|AB25B_ARATH ABC transporter B family member 25, mitochondrial OS=Arabidopsis thaliana GN=ABCB25 PE=1 SV=1 0.0	tr|A0A068U641|A0A068U641_COFCA Uncharacterized protein OS=Coffea canephora GN=GSCOC_T00016552001 PE=4 SV=1 7.5e-283	GO:0005215, transporter activity;GO:0005524, ATP binding;GO:0005739, mitochondrion;GO:0005743, mitochondrial inner membrane;GO:0006777, Mo-molybdopterin cofactor biosynthetic process;GO:0006811, ion transport;GO:0006879, cellular iron ion homeostasis;GO:0009507, chloroplast;GO:0009555, pollen development;GO:0009658, chloroplast organization;GO:0009941, chloroplast envelope;GO:0010288, response to…	K05663-ko02010 ABC transporters
TRINITY_DN92406_c0_g1	ATTAAGTACTCTATTTACTGTTTGAATGAATCCTTATTACGGGAAAATCCCAGCGTGGAGATCCCATCCGCGTAATTTCCCTACAAACAAAATAAAGAAAGAAGCATATAGTCAAACACAATCAAGGACAACTAAATCTCCCAACCTAAACCGTTACAGACAGTCCACCCACATAATCTAAACAAACAACAATTCACACACCAACTACACACACATAACAATGGAACTCCAAACAGGCTTCCCTCTCCTCCTCCAACAATTCAAATCCTTATTCTTCAAAAACTTGCTCTTATCATGGCGTAGCAAACGAGCTACATTAACTCAGCTCTTCTCTTCTCTCTTCTTCATCTTTCTCATTTACGCTATTCAACAAGCCATCGAAGCTAGCTTCGATTCTTC…	cd03263, ABC_subfamily_A, ATP-binding cassette domain of the lipid transporters, subfamily A. The ABCA subfamily mediates the transport of a variety of lipid compounds. Mutations of members of ABCA subfamily are associated with human genetic diseases, such as, familial high-density lipoprotein (HDL) deficiency, neonatal surfactant deficiency, degenerative retinopathies, and congenital keratinizat…	KOG0059, KOG0059, KOG0059, Lipid exporter ABCA1 and related proteins, ABC superfamily [Lipid transport and metabolism, General function prediction only]. 1.13315e-71	gi|1021033318|gb|KZM91102.1| hypothetical protein DCAR_021533 [Daucus carota subsp. sativus] 0.0e+00	gi|828309811|ref|XM_004499374.2| PREDICTED: Cicer arietinum ABC transporter A family member 2 (LOC101494799), mRNA 0.0	pfam00005, ABC_tran, ABC transporter. ABC transporters for a large family of proteins responsible for translocation of a variety of compounds across biological membranes. ABC transporters are the largest family of proteins in many completely sequenced bacteria. ABC transporters are composed of two copies of this domain and two copies of a transmembrane domain pfam00664. These four domains may bel…	sp|Q84K47|AB2A_ARATH ABC transporter A family member 2 OS=Arabidopsis thaliana GN=ABCA2 PE=2 SV=1 0.0	tr|M5W3T9|M5W3T9_PRUPE Uncharacterized protein OS=Prunus persica GN=PRUPE_ppa001009mg PE=4 SV=1 0.0e+00	GO:0005215, transporter activity;GO:0005524, ATP binding;GO:0006869, lipid transport;GO:0016021, integral component of membrane;GO:0016887, ATPase activity;GO:0042626, ATPase activity, coupled to transmembrane movement of substances;GO:0043231, intracellular membrane-bounded organelle	-
TRINITY_DN92081_c0_g1	TTGATTTCCTGTAGAGAATTTCAAAAACCGAGCCTAAGGCTTGAGATCCCTTGACAATGTCAGGGGCCAGAGCAAGTGTTTCTGCCACTGACAATGCAGTGATTATCAATATCATAAAACACTTAATTAAGTCGCCGAAGTTTGATTTCTTATCCTTCATTAAAACTGATGCATACCAGAGACCAAGTGCATAAGAACAAAATGCAAAGAGCTGTGTCACACCATAGCCCAAACCTGATATATGGCCACGTAAGAGCGCCTGGTTGCTTGGTTCCTTCAGTTCAGATGCATATTGGAGAGCAATTTGATCTTCAGCGCCAAATGCAGCAACAGTACGGATACTGGCAATAGCTTCACATGCCACAGCAGTTGCACGCGAGTATGAACGGTTGTAATCTC…	TIGR00958, Antigen_peptide_transporter_2, Conjugate Transporter-2 (CT2) Family protein. [Transport and binding proteins, Other]. 3.74166e-46	KOG0055, KOG0055, KOG0055, Multidrug/pheromone exporter, ABC superfamily [Secondary metabolites biosynthesis, transport and catabolism]. 3.07162e-126	gi|1021042960|gb|KZN00741.1| hypothetical protein DCAR_009495 [Daucus carota subsp. sativus] 4.1e-240	gi|590594437|ref|XM_007017789.1| Theobroma cacao P-glycoprotein 13 (TCM_034256) mRNA, complete cds 0.0	pfam00664, ABC_membrane, ABC transporter transmembrane region. This family represents a unit of six transmembrane helices. Many members of the ABC transporter family (pfam00005) have two such regions. 1.51691e-28	sp|Q9C7F8|AB13B_ARATH ABC transporter B family member 13 OS=Arabidopsis thaliana GN=ABCB13 PE=3 SV=1 0.0	tr|A5CAU4|A5CAU4_VITVI Putative uncharacterized protein OS=Vitis vinifera GN=VITISV_031708 PE=4 SV=1 1.6e-196	GO:0005524, ATP binding;GO:0016021, integral component of membrane;GO:0042626, ATPase activity, coupled to transmembrane movement of substances;GO:0055085, transmembrane transport	K05658-ko04976 Bile secretion;ko02010 ABC transporters
TRINITY_DN91254_c0_g1	GATTCCTCTGATCATTCTAGCTCAAACATTATTTCAGCTTCTTCAAATAGCTAGCAATTGGTGGATGGCCTGGGCAAACCCTCAAACAGCAGGTGGCCAACCTAAAACAACTAATATTGTCCTTATTGTAGTGTATATGGCCCTTGCTTTTGGGAGTTCTTGGTTTATATTTGTTAGGGCTGTACTAGTGGCTACCTTTGGTCTAGCAGCTGGGCAAAAGTTGTTCCTAAAAATGCTTACTAATGTGTTTCATGCACCAATGTCTTTCTTTGACTCCACCCCAGCTGGACGGATCTTGAATCGCGTATCAGTTGACCAAAGTGTCGTTGACCTTGATATGCCCTTCAGACTTGGTGGTTTTGCTTCAACAACAATCCAGCTTCTTGGCATTGTTGGTGT…	TIGR00957, Multidrug_resistance-associated_protein_1, multi drug resistance-associated protein (MRP). This model describes multi drug resistance-associated protein (MRP) in eukaryotes. The multidrug resistance-associated protein is an integral membrane protein that causes multidrug resistance when overexpressed in mammalian cells. It belongs to ABC transporter superfamily. The protein topology an…	KOG0054, KOG0054, KOG0054, Multidrug resistance-associated protein/mitoxantrone resistance protein, ABC superfamily [Secondary metabolites biosynthesis, transport and catabolism]. 6.10154e-164	gi|1021046057|gb|KZN03838.1| hypothetical protein DCAR_012594 [Daucus carota subsp. sativus] 9.7e-275	gi|645259903|ref|XM_008237360.1| PREDICTED: Prunus mume ABC transporter C family member 5 (LOC103334401), mRNA 0.0	pfam00005, ABC_tran, ABC transporter. ABC transporters for a large family of proteins responsible for translocation of a variety of compounds across biological membranes. ABC transporters are the largest family of proteins in many completely sequenced bacteria. ABC transporters are composed of two copies of this domain and two copies of a transmembrane domain pfam00664. These four domains may bel…	sp|A7KVC2|AB4C_MAIZE ABC transporter C family MRP4 OS=Zea mays GN=MRP4 PE=2 SV=1 0.0	tr|A0A0V0IZX6|A0A0V0IZX6_SOLCH Putative ABC transporter C family member 5-like OS=Solanum chacoense PE=4 SV=1 3.6e-269	GO:0005524, ATP binding;GO:0016021, integral component of membrane;GO:0042626, ATPase activity, coupled to transmembrane movement of substances;GO:0055085, transmembrane transport	-
TRINITY_DN91059_c0_g2	GACAATGATAGAGATTTCAGATGTTTTAGGGTTAAGGAGGCTGGCTGCAAAGGCGAAAGTTTCAGCGACAGTAAGTAAAGGGAGACATGCATCATGCTGAGGAACATAAGCCGAGAGCTTTCTAAATGAAGAATGATTGAGAGGGGAAGAATTGAGAAGTAAAGTGCCATTTGTTGGGGATGTTCTAGCTGCTAATATGTCTAAAAGGGTGGATTTTCCGGCACCACTTGGGCCTACAATGGCAAGGATTTGAGAGGGATATGCAGTGAGAGTGATGTCTTGTAAGATATAGTTTAGAGGTGTTGGAGTGCAAGTTCTAAAAGAAAAAGTGGTGGTGGATTTGGAATAGGAGATTGAAGAAGCTGTTATTTGGTATGTTCTGGGAGGAGGCTTTTGAGG…	cd03213, ABCG_EPDR, Eye pigment and drug resistance transporter subfamily G of the ATP-binding cassette superfamily. ABCG transporters are involved in eye pigment (EP) precursor transport, regulation of lipid-trafficking mechanisms, and pleiotropic drug resistance (DR). DR is a well-described phenomenon occurring in fungi and shares several similarities with processes in bacteria and higher eukar…	KOG0061, KOG0061, KOG0061, Transporter, ABC superfamily (Breast cancer resistance protein) [Secondary metabolites biosynthesis, transport and catabolism]. 7.41146e-15	gi|1021044114|gb|KZN01895.1| hypothetical protein DCAR_010649 [Daucus carota subsp. sativus] 2.7e-46	-	pfam00005, ABC_tran, ABC transporter. ABC transporters for a large family of proteins responsible for translocation of a variety of compounds across biological membranes. ABC transporters are the largest family of proteins in many completely sequenced bacteria. ABC transporters are composed of two copies of this domain and two copies of a transmembrane domain pfam00664. These four domains may bel…	sp|Q9SW08|AB4G_ARATH ABC transporter G family member 4 OS=Arabidopsis thaliana GN=ABCG4 PE=3 SV=1 2.4066e-31	tr|F6H6M1|F6H6M1_VITVI Putative uncharacterized protein OS=Vitis vinifera GN=VIT_16s0050g01620 PE=4 SV=1 2.2e-32	GO:0005524, ATP binding;GO:0005886, plasma membrane;GO:0016021, integral component of membrane;GO:0042626, ATPase activity, coupled to transmembrane movement of substances	-
TRINITY_DN90644_c1_g4	AACATGTGGTAAAGCCGGCTTGAGGGCTGGTGAATCGTGGTGATAACTGTACGACCGCCACTAGCTAATCGTTTGACTGTTGTTAGGATCCGCTGAGCTGTAGTTGAGTCTAGACCCGAGGTTGGTTCATCTAACAACAATAAGCTTGGATTGGTGAGCATCTCTTGTCCTATGCTCACCCTCTTTTTCTCCCCACCTGAAATGCCCCTAAATAGTGGACCACCTATCATGCTATTCTTGCACCGAATGAGCCCCAGTTCTGTAATAACGTTCTCCACATGTTGCACTTTTTCGTCATGAGTAAGGGTTTTGGGAAGTCTAAGCAGTGCAGTGTACAATAGTGTTTCGGCTACAGTGAGATGAGGGTATAGCACATCATCTTGGGCAACAAAACCTGTA…	PLN03211, PLN03211, ABC transporter G-25; Provisional. 4.42836e-72	KOG0061, KOG0061, KOG0061, Transporter, ABC superfamily (Breast cancer resistance protein) [Secondary metabolites biosynthesis, transport and catabolism]. 1.76546e-53	gi|1021054088|gb|KZN11866.1| hypothetical protein DCAR_004522 [Daucus carota subsp. sativus] 1.2e-138	-	pfam00005, ABC_tran, ABC transporter. ABC transporters for a large family of proteins responsible for translocation of a variety of compounds across biological membranes. ABC transporters are the largest family of proteins in many completely sequenced bacteria. ABC transporters are composed of two copies of this domain and two copies of a transmembrane domain pfam00664. These four domains may bel…	sp|Q9C6W5|AB14G_ARATH ABC transporter G family member 14 OS=Arabidopsis thaliana GN=ABCG14 PE=2 SV=1 1.44408e-117	tr|A0A103XQT6|A0A103XQT6_CYNCS AAA+ ATPase domain-containing protein OS=Cynara cardunculus var. scolymus GN=Ccrd_002796 PE=4 SV=1 5.1e-105	GO:0005524, ATP binding;GO:0005886, plasma membrane;GO:0010222, stem vascular tissue pattern formation;GO:0010588, cotyledon vascular tissue pattern formation;GO:0016021, integral component of membrane;GO:0016887, ATPase activity;GO:0042626, ATPase activity, coupled to transmembrane movement of substances	-
TRINITY_DN90573_c0_g1	ATACATAAACAACTGGAAAAACAAAACCCACAAAACACATTAAGACAATGCCAAACTCATCATAACCGTGCCGGCGACTCCTCACGACGTGTTCTCCCCTGGGCCCCACTTTCCAATCTTACACTGTCTGGATTTATAAATATACATACATGTCTGAACCTCAAAGAAATCAAAAGCAAACATGAACGACACAACTAGACAAATCTACTTATTATCCGCCATTGTCATCTTCTTCAGCTACTTACACTTGTCACACTGCCAAATCGGTGCCGGAGACGGCGATTTTTCCGGCGATATTAATAATCCGGCGGTGCTCCCGTATCTTACGCAAGTCATATACTCTCGTTTATCCAATGCTACTTCTTCGGTTCTTTCTTCGGACATTAGTAGACAATTCAA…	PLN03211, PLN03211, ABC transporter G-25; Provisional. 4.80096e-52	KOG0061, KOG0061, KOG0061, Transporter, ABC superfamily (Breast cancer resistance protein) [Secondary metabolites biosynthesis, transport and catabolism]. 4.38617e-54	gi|1021047813|gb|KZN05593.1| hypothetical protein DCAR_006430 [Daucus carota subsp. sativus] 0.0e+00	gi|1025064390|ref|XM_016594926.1| PREDICTED: Nicotiana tabacum ABC transporter G family member 24-like (LOC107775216), mRNA 0.0	pfam00005, ABC_tran, ABC transporter. ABC transporters for a large family of proteins responsible for translocation of a variety of compounds across biological membranes. ABC transporters are the largest family of proteins in many completely sequenced bacteria. ABC transporters are composed of two copies of this domain and two copies of a transmembrane domain pfam00664. These four domains may bel…	sp|Q9MAG3|AB24G_ARATH ABC transporter G family member 24 OS=Arabidopsis thaliana GN=ABCG24 PE=2 SV=2 0.0	tr|B9HUH9|B9HUH9_POPTR ABC transporter family protein OS=Populus trichocarpa GN=POPTR_0010s23210g PE=4 SV=2 0.0e+00	GO:0005524, ATP binding;GO:0005886, plasma membrane;GO:0016021, integral component of membrane;GO:0042626, ATPase activity, coupled to transmembrane movement of substances	-
TRINITY_DN90563_c0_g1	GAAAAACTTAGGGTTTGTAAGCTTGCTGAAGAATCGTTGAATAATCGAAGAATCGAAGGAGAAACTGAAGAATTTAAGCTCATAATCGAATAATCAAATCTAATTATCGAAGAATCGAAGCTCATTATCGAAGAATCAAAGCACAAATCGAAAAATCAAAGCTAATCGCTCTAATTCATTAAGAGTTTGCAATAAGGATATAGTGGATATAAAAAAGCATGGGATGAGTTATGGTTCTGGTTCTATTGGAAATCTTACTGTTCATCAGTTGTGGACTACAAGCCTTCAACACTGCTTCGCCATGTACCACTCAGTTGGTCTTGCTACAATTGCATCATTGATTACCATAATTCTTACCGGTCTTTGCAATACTCCCCTAGCTAAATTACAACAAAAATT…	TIGR00957, Multidrug_resistance-associated_protein_1, multi drug resistance-associated protein (MRP). This model describes multi drug resistance-associated protein (MRP) in eukaryotes. The multidrug resistance-associated protein is an integral membrane protein that causes multidrug resistance when overexpressed in mammalian cells. It belongs to ABC transporter superfamily. The protein topology an…	KOG0054, KOG0054, KOG0054, Multidrug resistance-associated protein/mitoxantrone resistance protein, ABC superfamily [Secondary metabolites biosynthesis, transport and catabolism]. 1.61933e-67	gi|1021044104|gb|KZN01885.1| hypothetical protein DCAR_010639 [Daucus carota subsp. sativus] 9.7e-130	-	pfam00005, ABC_tran, ABC transporter. ABC transporters for a large family of proteins responsible for translocation of a variety of compounds across biological membranes. ABC transporters are the largest family of proteins in many completely sequenced bacteria. ABC transporters are composed of two copies of this domain and two copies of a transmembrane domain pfam00664. These four domains may bel…	sp|Q9LYS2|AB10C_ARATH ABC transporter C family member 10 OS=Arabidopsis thaliana GN=ABCC10 PE=2 SV=2 3.22294e-119	tr|A0A067EQM0|A0A067EQM0_CITSI Uncharacterized protein (Fragment) OS=Citrus sinensis GN=CISIN_1g0007132mg PE=4 SV=1 1.1e-112	GO:0005524, ATP binding;GO:0005774, vacuolar membrane;GO:0008559, xenobiotic transmembrane transporting ATPase activity;GO:0016021, integral component of membrane;GO:0042626, ATPase activity, coupled to transmembrane movement of substances	K05666-ko02010 ABC transporters;ko04976 Bile secretion
TRINITY_DN90372_c0_g4	CATGGAATGGTTCTTCCTTTTCAACCTCTGTCCATCACATTTGACAATATAAGCTACAGGGTCGATATGCCTCGGGAAATGAAAGCTCAAGGTGTTCCTGAAGAGCGGCTAGAACTTTTAAAAGGCGTCAGTGGTGCATTTAGGCCAGGAGTTCTTACGGCTCTAATGGGTGTTAGTGGAGCTGGGAAGACTACGCTGATGGATGTCTTGGCTGGTAGAAAAACAGGTGGCTATGTTGAGGGAACAATCACTATATCTGGATATCCGAAGAAGCAAGAAACTTTTGCTCGTATTGCAGGGTACTGTGAACAAACTGATATTCACTCTCCTCATGTTACAGTTTATGAGTCCTTGCAATATTCTGCATGGCTTCGATTGCCTCCTGAAGTTGATGCTACA…	PLN03140, PLN03140, ABC transporter G family member; Provisional. 2.26384e-79	KOG0065, KOG0065, KOG0065, Pleiotropic drug resistance proteins (PDR1-15), ABC superfamily [Secondary metabolites biosynthesis, transport and catabolism]. 7.50242e-61	gi|1021050707|gb|KZN08485.1| hypothetical protein DCAR_001031 [Daucus carota subsp. sativus] 5.2e-84	gi|802627354|ref|XM_012221264.1| PREDICTED: Jatropha curcas pleiotropic drug resistance protein 1-like (LOC105637689), transcript variant X7, mRNA 6.14304e-113	pfam00005, ABC_tran, ABC transporter. ABC transporters for a large family of proteins responsible for translocation of a variety of compounds across biological membranes. ABC transporters are the largest family of proteins in many completely sequenced bacteria. ABC transporters are composed of two copies of this domain and two copies of a transmembrane domain pfam00664. These four domains may bel…	sp|Q8GU88|AB39G_ORYSJ ABC transporter G family member 39 OS=Oryza sativa subsp. japonica GN=ABCG39 PE=3 SV=1 2.11507e-89	tr|F6HX64|F6HX64_VITVI Putative uncharacterized protein OS=Vitis vinifera GN=VIT_09s0002g05530 PE=3 SV=1 1.2e-77	GO:0005524, ATP binding;GO:0005886, plasma membrane;GO:0016021, integral component of membrane;GO:0042626, ATPase activity, coupled to transmembrane movement of substances	-
TRINITY_DN90067_c0_g1	GGCGAAATGGAAAAAGCAAACGTGTAATAAAAAAGAAAAGGAAGTAGGGGCCCATTAGAAGATCCAGGTTAACAAAAAACAAGTACTAGTAGTAAAAGTGCTCTGCGAGACTAGCACAAGATCTTAATTTTCTTCGTCTGTTTACATTACTCCCTATCTCATTTTCTTCCCCCATTTTCCCCGGTCTTTTTCTTGCCGTTATAAACTGTTCAATTACCAAGTCCACACATATTGACACAGATTAATCAATGGCGGTCGGAGTTTCCAGCAGCTGGACTCAGGCCAATGCTTTGCTCAGAAAGAATTTAACTTTCCAGAAACGGAACATGGGAGCAAATGTTCGACTCATTCTCTTTCCATTTGTTCTCTGCTTGCTACTTGTTCTGCTCCAAAGTATAA…	cd03263, ABC_subfamily_A, ATP-binding cassette domain of the lipid transporters, subfamily A. The ABCA subfamily mediates the transport of a variety of lipid compounds. Mutations of members of ABCA subfamily are associated with human genetic diseases, such as, familial high-density lipoprotein (HDL) deficiency, neonatal surfactant deficiency, degenerative retinopathies, and congenital keratinizat…	KOG0059, KOG0059, KOG0059, Lipid exporter ABCA1 and related proteins, ABC superfamily [Lipid transport and metabolism, General function prediction only]. 6.54704e-38	gi|661884101|emb|CDP12363.1| unnamed protein product [Coffea canephora] 4.7e-271	gi|747051072|ref|XM_011073319.1| PREDICTED: Sesamum indicum ABC transporter A family member 7-like (LOC105157025), transcript variant X1, mRNA 0.0	pfam00005, ABC_tran, ABC transporter. ABC transporters for a large family of proteins responsible for translocation of a variety of compounds across biological membranes. ABC transporters are the largest family of proteins in many completely sequenced bacteria. ABC transporters are composed of two copies of this domain and two copies of a transmembrane domain pfam00664. These four domains may bel…	sp|Q9STT5|AB7A_ARATH ABC transporter A family member 7 OS=Arabidopsis thaliana GN=ABCA7 PE=3 SV=2 0.0	tr|A0A068UXK2|A0A068UXK2_COFCA Uncharacterized protein OS=Coffea canephora GN=GSCOC_T00035857001 PE=4 SV=1 3.6e-271	GO:0005215, transporter activity;GO:0005524, ATP binding;GO:0005886, plasma membrane;GO:0006869, lipid transport;GO:0009506, plasmodesma;GO:0016021, integral component of membrane;GO:0016887, ATPase activity;GO:0042626, ATPase activity, coupled to transmembrane movement of substances;GO:0043231, intracellular membrane-bounded organelle	-
TRINITY_DN89676_c0_g1	GTGAACAATAGATTTTTGATGTGAAAACAGGGAGGCATTTTGGTAATTTTTCCGTACCGCAGAAAGTTTTTGCGGTACGGTACGAATTTTTTTAAATTAGGACCGTTGGATGATTGATCCAACGGCCCAGGAAATATCCAACGGCCCAGGAAACGTATGTTGCATAAACATTATATAGCATACGTATGATGGTGACCGAGAGCCTTTACATACATACATACATACATACAAATAATAGAATCCTGAGAAATGTTATTCAGAAACTGATCTAAACTTTCATTATTGCTAGTAAATATATCTTACTTACAAAATTATATTCTAGAATACAGAGTTAAATAATGCACCCGAGAAGTGGTTGCATTCCACAAGTTTACCGCTACTTACTTTGCTTCAGCATAT…	TIGR00957, Multidrug_resistance-associated_protein_1, multi drug resistance-associated protein (MRP). This model describes multi drug resistance-associated protein (MRP) in eukaryotes. The multidrug resistance-associated protein is an integral membrane protein that causes multidrug resistance when overexpressed in mammalian cells. It belongs to ABC transporter superfamily. The protein topology an…	KOG0054, KOG0054, KOG0054, Multidrug resistance-associated protein/mitoxantrone resistance protein, ABC superfamily [Secondary metabolites biosynthesis, transport and catabolism]. 2.78943e-179	gi|1021052389|gb|KZN10167.1| hypothetical protein DCAR_002823 [Daucus carota subsp. sativus] 0.0e+00	gi|567903635|ref|XM_006444243.1| Citrus clementina hypothetical protein (CICLE_v10018482mg) mRNA, complete cds 0.0	pfam00664, ABC_membrane, ABC transporter transmembrane region. This family represents a unit of six transmembrane helices. Many members of the ABC transporter family (pfam00005) have two such regions. 3.00739e-09	sp|Q9LZJ5|AB14C_ARATH ABC transporter C family member 14 OS=Arabidopsis thaliana GN=ABCC14 PE=1 SV=1 0.0	tr|A0A0B0NHB7|A0A0B0NHB7_GOSAR ABC transporter C family member 4 OS=Gossypium arboreum GN=F383_17976 PE=4 SV=1 0.0e+00	GO:0000325, plant-type vacuole;GO:0005524, ATP binding;GO:0005773, vacuole;GO:0005774, vacuolar membrane;GO:0005794, Golgi apparatus;GO:0008559, xenobiotic transmembrane transporting ATPase activity;GO:0016021, integral component of membrane;GO:0042626, ATPase activity, coupled to transmembrane movement of substances	K05666-ko02010 ABC transporters;ko04976 Bile secretion
TRINITY_DN88597_c0_g3	GGAAATCATAAAAACCAAGCTTGTAAAAAATCCTAAATCAACTGTAATTTATTTCGACAAACAAAAAGACTTGGCAAAAAAATAAAATAATAAAAAAGTCGACAAACACAAAAGCAACCGAATTTGCACCGCTCCCAGCCTCCCAACACAAGTAGGAAGCAACTACCATAGCTGTACCTGATCAACATAAACTTTAGTCGGAGTCCCGGAGATGGTGTTGGATTTTTGCGTTACTCAAAATTAACCAACACCTCTACCATTAAAGAAACATACCATGGAGAAGCACGATACGGTACTTGTATGCTTTTAGCCAGAACACATCTACGATAATAGAAACTGTCAGATAACAAGACTTAAAGGAACTTAACATTCTCTAAAGCAATCAAGAACGAACATGAG…	PLN03073, PLN03073, ABC transporter F family; Provisional. 4.71442e-65	KOG0927, KOG0927, KOG0927, Predicted transporter (ABC superfamily) [General function prediction only]. 3.36306e-121	gi|1021026571|gb|KZM84358.1| hypothetical protein DCAR_028348 [Daucus carota subsp. sativus] 1.1e-147	gi|567863675|ref|XM_006424429.1| Citrus clementina hypothetical protein (CICLE_v10028056mg) mRNA, complete cds 0.0	pfam00005, ABC_tran, ABC transporter. ABC transporters for a large family of proteins responsible for translocation of a variety of compounds across biological membranes. ABC transporters are the largest family of proteins in many completely sequenced bacteria. ABC transporters are composed of two copies of this domain and two copies of a transmembrane domain pfam00664. These four domains may bel…	sp|Q9FJH6|AB1F_ARATH ABC transporter F family member 1 OS=Arabidopsis thaliana GN=ABCF1 PE=1 SV=1 2.51005e-168	tr|B9HQM5|B9HQM5_POPTR ABC transporter family protein OS=Populus trichocarpa GN=POPTR_0009s01320g PE=4 SV=1 6.2e-138	GO:0005215, transporter activity;GO:0005524, ATP binding;GO:0005886, plasma membrane;GO:0016887, ATPase activity	-
TRINITY_DN88551_c0_g1	TACAATTCTTGTAAATCTCACTCACAACTTCGTACACTTTTATATGTTCGAAACTCGTTGATTAGAGATGGCAACTCGAAATAGTTCACCGATAAGAAATAGCATGCCGTTTTTTAATCTAAGAGAAGAAATCGAGCCTTCACGACTTCGGAGCTCACCGACACTTGGCCAGCTACTGAAATGTGTCGGAGATGTTCGAAAAGATGTCGTTGGCGATGAAACACCGCCCCATCAGTCGCTTGACTTGAGCGATGATACGATGAGTACTGATTCTCGGGCTATGCCTTTTGTTCTAGCGTTTAATAATTTAACGTACAGTGTTCAAGTTCGTCGTAAGATGAAGGTCCCGTCCTTGTTTCAGAACGGGACCTCAGAGACTAATTCTGCTGCGGGAGAGAA…	TIGR00955, Protein_white, The Eye Pigment Precursor Transporter (EPP) Family protein. [Transport and binding proteins, Other]. 1.92842e-83	KOG0061, KOG0061, KOG0061, Transporter, ABC superfamily (Breast cancer resistance protein) [Secondary metabolites biosynthesis, transport and catabolism]. 3.25253e-85	gi|1021039610|gb|KZM97391.1| hypothetical protein DCAR_015247 [Daucus carota subsp. sativus] 0.0e+00	gi|1000953552|ref|XR_001535640.1| PREDICTED: Ricinus communis ABC transporter G family member 20 (LOC8283862), transcript variant X2, misc_RNA 0.0	pfam00005, ABC_tran, ABC transporter. ABC transporters for a large family of proteins responsible for translocation of a variety of compounds across biological membranes. ABC transporters are the largest family of proteins in many completely sequenced bacteria. ABC transporters are composed of two copies of this domain and two copies of a transmembrane domain pfam00664. These four domains may bel…	sp|Q9M2V7|AB16G_ARATH ABC transporter G family member 16 OS=Arabidopsis thaliana GN=ABCG16 PE=2 SV=2 0.0	tr|A0A103YD59|A0A103YD59_CYNCS AAA+ ATPase domain-containing protein OS=Cynara cardunculus var. scolymus GN=Ccrd_014737 PE=4 SV=1 8.9e-304	GO:0005524, ATP binding;GO:0005886, plasma membrane;GO:0010208, pollen wall assembly;GO:0016021, integral component of membrane;GO:0016887, ATPase activity;GO:0042626, ATPase activity, coupled to transmembrane movement of substances	-
TRINITY_DN88481_c2_g1	TGAAGATCAGGTTCCCTGAGCGCGGAAGAAGTGGAAGAACAGTTGCAATGATCAAGAATCTTGAATTCAGCTACGGTGATCAGGTTCTCTTCAAGAATGCAAATTTAACTATTGAAAGAGGGGAGAAAGTTGCTATTCTTGGTCCCAATGGGTGTGGTAAAAGTACATTGCTTAAACTACTTATGGGATTGGAAAAGCCAACAAGAGGTGAAGTGTTGCTTGGAGAGCATAATGTGTTACCAAACTATTTCGAGCAAAATCAGGCTGAAGCACTTGACCTGGATAAGACAGTACTGGACACTGTAGCAGAAGTAGCAGAGGACTGGAAATTGGATGATATAAAGGGTCTTCTTGGACGTTGTAATTTCAAGGCTAATATGCTTGATAGGAAGGTCTCTC…	PRK15064, PRK15064, ABC transporter ATP-binding protein; Provisional. 1.08053e-40	KOG0927, KOG0927, KOG0927, Predicted transporter (ABC superfamily) [General function prediction only]. 4.4406e-41	gi|661883550|emb|CDP12894.1| unnamed protein product [Coffea canephora] 4.8e-110	gi|694416466|ref|XM_009338084.1| PREDICTED: Pyrus x bretschneideri ABC transporter F family member 5 (LOC103928954), mRNA 5.64251e-148	pfam00005, ABC_tran, ABC transporter. ABC transporters for a large family of proteins responsible for translocation of a variety of compounds across biological membranes. ABC transporters are the largest family of proteins in many completely sequenced bacteria. ABC transporters are composed of two copies of this domain and two copies of a transmembrane domain pfam00664. These four domains may bel…	sp|Q9LV93|AB5F_ARATH ABC transporter F family member 5 OS=Arabidopsis thaliana GN=ABCF5 PE=2 SV=1 4.13922e-128	tr|A0A068UXA8|A0A068UXA8_COFCA Uncharacterized protein OS=Coffea canephora GN=GSCOC_T00037577001 PE=4 SV=1 3.6e-110	GO:0005215, transporter activity;GO:0005524, ATP binding;GO:0009624, response to nematode;GO:0016887, ATPase activity	-
TRINITY_DN88284_c0_g1	CATGCATCATCAACATTATCAGTGATTTTCGTGGTGATTTATGGAGCTAAATTGACAATTTCTGGTTCTATGACCCCTGGTGCTCTTACATCTTTCATACTTTACAGTCTCACTGTTGGGACATCTGTATCAGGACTGTCAGGATTATATGCAGTAGTGATGAAAGCTGCTGGAGCAAGTAGGAGGGTTTTTCAGCTTCTGGATCGTGTTTCATCCATGACAAAATCTGGAAATAAGTGTCCTCTCGGGTCAGTTATACAAAGAGCCATCTCTTGTTTATAACATTATATTATGCAATGCAATGATAGAATACTTAGATAATGGATGGTAGAAAATAACATTGATTATGGACTACCAAATACTTGAGAGATTACCCTACAAATGTCGATAGTCGTGTGG…	cd03249, ABC_MTABC3_MDL1_MDL2, ATP-binding cassette domain of a mitochondrial protein MTABC3 and related proteins. MTABC3 (also known as ABCB6) is a mitochondrial ATP-binding cassette protein involved in iron homeostasis and one of four ABC transporters expressed in the mitochondrial inner membrane, the other three being MDL1(ABC7), MDL2, and ATM1. In fact, the yeast MDL1 (multidrug resistance-li…	KOG0058, KOG0058, KOG0058, Peptide exporter, ABC superfamily [Intracellular trafficking, secretion, and vesicular transport]. 2.64044e-93	gi|1021031693|gb|KZM89477.1| hypothetical protein DCAR_023160 [Daucus carota subsp. sativus] 2.4e-118	gi|720006484|ref|XM_010259694.1| PREDICTED: Nelumbo nucifera ABC transporter B family member 25 (LOC104597910), transcript variant X3, mRNA 8.16737e-147	pfam00005, ABC_tran, ABC transporter. ABC transporters for a large family of proteins responsible for translocation of a variety of compounds across biological membranes. ABC transporters are the largest family of proteins in many completely sequenced bacteria. ABC transporters are composed of two copies of this domain and two copies of a transmembrane domain pfam00664. These four domains may bel…	sp|Q9FNU2|AB25B_ORYSJ ABC transporter B family member 25 OS=Oryza sativa subsp. japonica GN=OsABCB25 PE=2 SV=1 4.56005e-130	tr|U5FQI3|U5FQI3_POPTR Uncharacterized protein OS=Populus trichocarpa GN=POPTR_0015s07050g PE=4 SV=1 2.5e-107	GO:0005524, ATP binding;GO:0005774, vacuolar membrane;GO:0016021, integral component of membrane;GO:0042626, ATPase activity, coupled to transmembrane movement of substances;GO:0055085, transmembrane transport	-
TRINITY_DN88186_c0_g1	ACAAATTCAAAAACATAGTTCTCTCAGTATTCCATTTCTCCACAGTACTAGTCGAATTTACTCTTTTCCTCAGGGTACATAAGCTTGCTGAGTTCTTCCCGTTTAGATAAAAAAAGGTGTTGGAGTCCAGCTACTAATTGAAGAATTTGTGTCATGGCCATGGAAAACGACGTAAATGGTGGTAATACAGAGTTTAGTTTAGCCTCTACATCAAGAGCTCAAATCCTGGATAGAGAGGCAGAGACAAATCATGAGGATCAAAAGAAGAAGGAAACAGAGACTACCAAAGTAGTCCCGTTTTACAAGCTCTTCTCATTTGCGGATTCAACGGATGTTATCTTGATGATTATGGGTACCATATCAGCTATTGGTAACGGAGTATGTCTGCCTATGTTGAGT…	pfam00664, ABC_membrane, ABC transporter transmembrane region. This family represents a unit of six transmembrane helices. Many members of the ABC transporter family (pfam00005) have two such regions. 1.16045e-08	KOG0055, KOG0055, KOG0055, Multidrug/pheromone exporter, ABC superfamily [Secondary metabolites biosynthesis, transport and catabolism]. 4.04262e-47	gi|1021047102|gb|KZN04882.1| hypothetical protein DCAR_005719 [Daucus carota subsp. sativus] 5.3e-82	gi|778667857|ref|XM_004152781.2| PREDICTED: Cucumis sativus ABC transporter B family member 4-like (LOC101209574), mRNA 2.69964e-53	pfam00664, ABC_membrane, ABC transporter transmembrane region. This family represents a unit of six transmembrane helices. Many members of the ABC transporter family (pfam00005) have two such regions. 2.77242e-09	sp|Q9FWX7|AB11B_ARATH ABC transporter B family member 11 OS=Arabidopsis thaliana GN=ABCB11 PE=2 SV=1 3.28554e-68	tr|F6HZG2|F6HZG2_VITVI Putative uncharacterized protein OS=Vitis vinifera GN=VIT_07s0005g02660 PE=4 SV=1 3.8e-64	GO:0005524, ATP binding;GO:0005886, plasma membrane;GO:0009506, plasmodesma;GO:0010329, auxin efflux transmembrane transporter activity;GO:0010540, basipetal auxin transport;GO:0016021, integral component of membrane;GO:0042626, ATPase activity, coupled to transmembrane movement of substances;GO:0055085, transmembrane transport	-
TRINITY_DN88132_c1_g1	AAAATGGTTCAATCTTCCAAATATACCAAATTGCATGAAATTTGTGTTTGTAGTTCTTGGTGTGGCTTTTGAAGATGCCTTTGCTGGTGTTTCCTATCTACTATGCTTCTGTTGAAAATGAACCTACGCAAACTTCAACTTACATGGGGACTTGACTTACATTTGTGCAGGAGATACAAAAAGCTATACTCAAATGTTCGGATATATAGTAGTAATAAATTGCTAGTGCTAGGTACAATGATATTTTCTTGAAACATAGTTAAGACTTTCTTGGCAGAACAAAAACACAAAAGCTTGAAACCAGATTATCACAATACTTCTAGTGGCGGTCTTCAAACGCGTCTGGGCGGTTGTGGTTGTCTACGCCTGCCACTTCCTGTAGATTTACTGTCCACAAAA…	TIGR00955, Protein_white, The Eye Pigment Precursor Transporter (EPP) Family protein. [Transport and binding proteins, Other]. 2.48423e-84	KOG0061, KOG0061, KOG0061, Transporter, ABC superfamily (Breast cancer resistance protein) [Secondary metabolites biosynthesis, transport and catabolism]. 4.688e-92	gi|1021044854|gb|KZN02635.1| hypothetical protein DCAR_011389 [Daucus carota subsp. sativus] 0.0e+00	gi|1000952722|ref|XM_002525624.2| PREDICTED: Ricinus communis ABC transporter G family member 11 (LOC8286479), transcript variant X2, mRNA 0.0	pfam00005, ABC_tran, ABC transporter. ABC transporters for a large family of proteins responsible for translocation of a variety of compounds across biological membranes. ABC transporters are the largest family of proteins in many completely sequenced bacteria. ABC transporters are composed of two copies of this domain and two copies of a transmembrane domain pfam00664. These four domains may bel…	sp|Q8RXN0|AB11G_ARATH ABC transporter G family member 11 OS=Arabidopsis thaliana GN=ABCG11 PE=1 SV=1 0.0	tr|B9SI51|B9SI51_RICCO ATP-binding cassette transporter, putative OS=Ricinus communis GN=RCOM_0612740 PE=4 SV=1 0.0e+00	GO:0005524, ATP binding;GO:0005886, plasma membrane;GO:0009611, response to wounding;GO:0009651, response to salt stress;GO:0009737, response to abscisic acid;GO:0009897, external side of plasma membrane;GO:0010222, stem vascular tissue pattern formation;GO:0010588, cotyledon vascular tissue pattern formation;GO:0015245, fatty acid transmembrane transporter activity;GO:0015416, ATPase-coupled org…	-
TRINITY_DN87750_c0_g1	GCCAAATGTATTCCTCCATTTCACAAGTGCACTTAAATTTATTTCATCGATAAGATCGTACATGCTAATTCCAAATTTTGGATTACAATGCCAATAGTTCAATCGTACATACTACTTCCACCTACCTCCTCTGGAAGTTAAGTTTTGCAGACAAGTATACAAAGAGTAATGCAAATGCAAATGGAAATGCAGAAAGAACTATTGCTACAAACCATGTATCATCATTACGATAACCAAAATTACTTTCTAAAAAGGCATTTGTGGCTTTTCTTTCCCCGAGTACTGCTATTTCTTTGTCTATGTCTCCATATTGTGTTGTGATAAAGCTTCTCAAGGACCAAGATGATGGGCATATCCAGTAACACCAAACCCACCACTTTGGGATTTGTGGTTCCGGAA…	PLN03140, PLN03140, ABC transporter G family member; Provisional. 0.0	KOG0065, KOG0065, KOG0065, Pleiotropic drug resistance proteins (PDR1-15), ABC superfamily [Secondary metabolites biosynthesis, transport and catabolism]. 9.26313e-158	gi|1021047110|gb|KZN04890.1| hypothetical protein DCAR_005727 [Daucus carota subsp. sativus] 1.2e-263	gi|590720166|ref|XM_007051194.1| Theobroma cacao Pleiotropic drug resistance 9 (TCM_004921) mRNA, complete cds 0.0	pfam00005, ABC_tran, ABC transporter. ABC transporters for a large family of proteins responsible for translocation of a variety of compounds across biological membranes. ABC transporters are the largest family of proteins in many completely sequenced bacteria. ABC transporters are composed of two copies of this domain and two copies of a transmembrane domain pfam00664. These four domains may bel…	sp|Q9LFH0|AB37G_ARATH ABC transporter G family member 37 OS=Arabidopsis thaliana GN=ABCG37 PE=2 SV=1 0.0	tr|A0A061DZG3|A0A061DZG3_THECC Pleiotropic drug resistance 9 OS=Theobroma cacao GN=TCM_004921 PE=3 SV=1 2.0e-242	GO:0005215, transporter activity;GO:0005524, ATP binding;GO:0005886, plasma membrane;GO:0006855, drug transmembrane transport;GO:0009506, plasmodesma;GO:0009926, auxin polar transport;GO:0016021, integral component of membrane;GO:0016887, ATPase activity;GO:0042626, ATPase activity, coupled to transmembrane movement of substances;GO:0048364, root development;GO:0055085, transmembrane transport;GO…	-
TRINITY_DN87368_c0_g2	AACAACCGTCCTCCTCCTGGATGGCCTACCTCAGGATCAATCAGATTTGAGGATGTTGTCCTACGTTATAGGCCTGAACTTCCTTCAGTATTGCATGAATTATCCTTCTCAATTTCTCCAACTAACAAGGTTGGGATAGTAGGGAGGACTGGAGCAGGAAAATCAAGCATGCTAAATGCTTTATTTCGAATTGTTGAACTGGAGAAGGGAAGAATTTTGATTGATGATTGTGATGTTTCAAAATTCGGATTGACAGATCTTCGTAAGGTTCTTGGTATTATACCACAGGCACCGGTTCTATTTTCAGGTAAAATCTAAAGGAAGTTGTTTTTTTACTTTTGATGAGG	PLN03130, PLN03130, ABC transporter C family member; Provisional. 1.37936e-58	KOG0054, KOG0054, KOG0054, Multidrug resistance-associated protein/mitoxantrone resistance protein, ABC superfamily [Secondary metabolites biosynthesis, transport and catabolism]. 5.97727e-40	gi|1021046230|gb|KZN04010.1| hypothetical protein DCAR_004808 [Daucus carota subsp. sativus] 8.5e-51	gi|764533689|ref|XM_004290533.2| PREDICTED: Fragaria vesca subsp. vesca ABC transporter C family member 2-like (LOC101290712), mRNA 1.51248e-67	pfam00005, ABC_tran, ABC transporter. ABC transporters for a large family of proteins responsible for translocation of a variety of compounds across biological membranes. ABC transporters are the largest family of proteins in many completely sequenced bacteria. ABC transporters are composed of two copies of this domain and two copies of a transmembrane domain pfam00664. These four domains may bel…	sp|Q9C8G9|AB1C_ARATH ABC transporter C family member 1 OS=Arabidopsis thaliana GN=ABCC1 PE=1 SV=1 5.49345e-56	tr|M5X2K5|M5X2K5_PRUPE Uncharacterized protein OS=Prunus persica GN=PRUPE_ppa000145mg PE=4 SV=1 1.2e-49	GO:0000325, plant-type vacuole;GO:0005524, ATP binding;GO:0005773, vacuole;GO:0005774, vacuolar membrane;GO:0008559, xenobiotic transmembrane transporting ATPase activity;GO:0009506, plasmodesma;GO:0015446, ATPase-coupled arsenite transmembrane transporter activity;GO:0015700, arsenite transport;GO:0016021, integral component of membrane;GO:0042626, ATPase activity, coupled to transmembrane movem…	-
TRINITY_DN87325_c0_g1	TAGATAAACTCATGTATATGCATACTGTAAAGTTCTTATTTTCACAAGATTTCTCCCCTTGCCTCTAAACAGTTGGTGCAATGTTCAGTCAAGAAACCAACTTAATCAGAATTGGTAATTTTTCCATGTACATTAATGCTATTCTGTGATGATGTAGAAAAACAATAACATGCACTTGTTGCCTTTTCTCAGTGTCGATCCTTCAGAGTATAATCAAATTCTTTCATAGTCGAGCCTGTCCGACTTGATAAGCATTTCTGTTGGAAGCCAAGCTGGTGCAGTTGGAACTCCAACCCATGCAATAAGTGCATATTCTCCGGTCTCAAAGATTTTCAAGTCCAAAACCTCGCCGCGGTCTTCATAGATGTAATCCAAGCCTTTGTAGTATGGTGGGTGTCC…	PRK13633, PRK13633, cobalt transporter ATP-binding subunit; Provisional. 3.98387e-31	KOG0055, KOG0055, KOG0055, Multidrug/pheromone exporter, ABC superfamily [Secondary metabolites biosynthesis, transport and catabolism]. 1.16677e-10	gi|1021040520|gb|KZM98301.1| hypothetical protein DCAR_014337 [Daucus carota subsp. sativus] 2.4e-86	gi|1025007615|ref|XM_016583940.1| PREDICTED: Nicotiana tabacum ABC transporter I family member 10, chloroplastic-like (LOC107765285), mRNA 5.19148e-83	pfam00005, ABC_tran, ABC transporter. ABC transporters for a large family of proteins responsible for translocation of a variety of compounds across biological membranes. ABC transporters are the largest family of proteins in many completely sequenced bacteria. ABC transporters are composed of two copies of this domain and two copies of a transmembrane domain pfam00664. These four domains may bel…	sp|Q8H1R4|AB10I_ARATH ABC transporter I family member 10, chloroplastic OS=Arabidopsis thaliana GN=ABCI10 PE=2 SV=1 3.60816e-68	tr|A0A0D2V151|A0A0D2V151_GOSRA Uncharacterized protein OS=Gossypium raimondii GN=B456_012G035000 PE=4 SV=1 1.0e-68	GO:0005215, transporter activity;GO:0005524, ATP binding;GO:0009941, chloroplast envelope;GO:0016887, ATPase activity	-
TRINITY_DN87265_c0_g4	TTGTGATCTCACATGACTACTCAACCAATTTATATTACACTCTTTTCTAATAAATGTCTACTGGTCTCCTCCCTTTCCATTCACTTCCCAAACCTCTCCTTCAATAAATCCCCACCGTTCTACACCTTCTCTCATTTTCCACACATTCAATATTATATAACCATATATTCATATACATAAAAACACACACCCACACCGGAGCTCACAATGAGCTACCAAATTGCATCGAGTTCTGGCGTCCAAGATGACGCCGGAAAAAATAATAACTTAAAGGAACAAGAAGAAGAAGAAGAAAAAACCAAGAAACCTGCTCAAACTGTGTCGTTATTTAAACTGTTTGCATTTGCGGATTCTTTTGATTATTTTCTTATGTTTTTTGGATCAGTTGGAGCTTGTATT…	pfam00664, ABC_membrane, ABC transporter transmembrane region. This family represents a unit of six transmembrane helices. Many members of the ABC transporter family (pfam00005) have two such regions. 1.05851e-23	KOG0055, KOG0055, KOG0055, Multidrug/pheromone exporter, ABC superfamily [Secondary metabolites biosynthesis, transport and catabolism]. 2.97602e-73	gi|1021053853|gb|KZN11631.1| hypothetical protein DCAR_004287 [Daucus carota subsp. sativus] 3.1e-145	gi|971560024|ref|XM_006352886.2| PREDICTED: Solanum tuberosum ABC transporter B family member 2-like (LOC102601060), mRNA 4.76787e-167	pfam00664, ABC_membrane, ABC transporter transmembrane region. This family represents a unit of six transmembrane helices. Many members of the ABC transporter family (pfam00005) have two such regions. 2.52887e-24	sp|Q8LPK2|AB2B_ARATH ABC transporter B family member 2 OS=Arabidopsis thaliana GN=ABCB2 PE=1 SV=3 2.7906e-149	tr|A0A068UXM2|A0A068UXM2_COFCA Uncharacterized protein OS=Coffea canephora GN=GSCOC_T00037810001 PE=4 SV=1 1.5e-123	GO:0005524, ATP binding;GO:0016020, membrane;GO:0016021, integral component of membrane;GO:0042626, ATPase activity, coupled to transmembrane movement of substances;GO:0055085, transmembrane transport	-
TRINITY_DN8683_c0_g1	TGGTGGGACTCAGGATATAGGCCACCCATCTTCAACCGCGAAAAAGGCCGTCAAAAACACACCGAAGACAGCATCGAAACCGTCTCACCCGCCGTCGCAGAAGAAACCGCGCGAGCAGAGCACTCAAACGACAGCCTTCGCGTCCTCCATCTCCAAAAGACCTTCGGAACCAACCACGCCGTCAACAACATAACCTTCGGGATCCCCCAAGGCCAAGTCTTCGCACTCCTCGGCCCCAACGGCGCCGGCAAATCCTCCACAATCTCGCTCGTACGCGGAGACATTCATCCCAGTACATCAATCAACGGCGGCGGCGATGTGCTGATCGAAGGCGTGAGCATTATTTCCAAGCGCTCAGTCGCTAGAGGCCATCTGGGAGTATGCCCGCAGTTCGACGCA…	cd03263, ABC_subfamily_A, ATP-binding cassette domain of the lipid transporters, subfamily A. The ABCA subfamily mediates the transport of a variety of lipid compounds. Mutations of members of ABCA subfamily are associated with human genetic diseases, such as, familial high-density lipoprotein (HDL) deficiency, neonatal surfactant deficiency, degenerative retinopathies, and congenital keratinizat…	KOG0059, KOG0059, KOG0059, Lipid exporter ABCA1 and related proteins, ABC superfamily [Lipid transport and metabolism, General function prediction only]. 9.64158e-25	gi|168049598|ref|XP_001777249.1| ATP-binding cassette transporter, subfamily A, group AOH, member 1 protein PpABCA1 [Physcomitrella patens] 2.4e-23	gi|189193502|ref|XM_001933055.1| Pyrenophora tritici-repentis Pt-1C-BFP nod factor export ATP-binding protein I, mRNA 1.96067e-63	pfam00005, ABC_tran, ABC transporter. ABC transporters for a large family of proteins responsible for translocation of a variety of compounds across biological membranes. ABC transporters are the largest family of proteins in many completely sequenced bacteria. ABC transporters are composed of two copies of this domain and two copies of a transmembrane domain pfam00664. These four domains may bel…	sp|Q8T6J2|ABCA5_DICDI ABC transporter A family member 5 OS=Dictyostelium discoideum GN=abcA5 PE=3 SV=1 2.42992e-24	tr|A9TF87|A9TF87_PHYPA ATP-binding cassette transporter, subfamily A, group AOH, member 1 protein PpABCA1 OS=Physcomitrella patens subsp. patens GN=ppabca1 PE=4 SV=1 1.8e-23	GO:0005524, ATP binding;GO:0006810, transport;GO:0006869, lipid transport;GO:0016021, integral component of membrane;GO:0030587, sorocarp development;GO:0031288, sorocarp morphogenesis;GO:0042626, ATPase activity, coupled to transmembrane movement of substances;GO:0043231, intracellular membrane-bounded organelle	-
TRINITY_DN86688_c1_g3	CACTCGTGGTATTGTGGAGGGGCTGTTAGACATAATCCATTTACTACCGAATAACAAGAAGAAACTGACCATTCTTGAAAATGTTAGCGGAATCATCAAGCCTAGCAGGATGACATTGCTTCTAGGTCCTCCCAGTTCAGGCAAGACCACACTGATGCTTGCTTTAGCTGGGAAGCTAGATCCTACCCTAAAGACTTCTGGAAGTGTGACTTACAATGGCCATAGCATGAAAGAGTTTGTTCCTCGAAGAACAGCTGCCTATATCAGCCAACATGATCTCCATATAGGAGAAATGACTGTGAGAGAAACCTTGGCTTTTTCTGCAAGGGTCCAGGGGGTCGGATCGCGCTATGAAATGTTGGCAGAGTTGGCACGAAGAGAGAAAGATGCAAATGTCAA…	PLN03140, PLN03140, ABC transporter G family member; Provisional. 2.57664e-96	KOG0065, KOG0065, KOG0065, Pleiotropic drug resistance proteins (PDR1-15), ABC superfamily [Secondary metabolites biosynthesis, transport and catabolism]. 4.37601e-67	gi|530354314|gb|AGT28053.1| pleiotropic drug resistance transporter 1 [Panax ginseng] 9.2e-96	gi|530354315|gb|KC013237.1| Panax ginseng pleiotropic drug resistance transporter 2 (PDR2) mRNA, complete cds 3.16139e-176	pfam00005, ABC_tran, ABC transporter. ABC transporters for a large family of proteins responsible for translocation of a variety of compounds across biological membranes. ABC transporters are the largest family of proteins in many completely sequenced bacteria. ABC transporters are composed of two copies of this domain and two copies of a transmembrane domain pfam00664. These four domains may bel…	sp|Q949G3|PDR1_NICPL Pleiotropic drug resistance protein 1 OS=Nicotiana plumbaginifolia GN=PDR1 PE=1 SV=1 3.61671e-113	tr|A0A096VPM7|A0A096VPM7_PANGI Pleiotropic drug resistance transporter 1 OS=Panax ginseng GN=PDR1 PE=2 SV=1 7.0e-96	GO:0005524, ATP binding;GO:0005886, plasma membrane;GO:0006810, transport;GO:0006952, defense response;GO:0016021, integral component of membrane;GO:0016887, ATPase activity	-
TRINITY_DN86659_c1_g2	GTAAAACAGAACAATAAGTTATCTTAATATGCAAATACTTCCTTTCCTGCAGCTGTGGCCTGATTGAAGATTTGCATGTCCGGTGCAGCATAAGTGATTGCTCCAAATAGAATGCTCATTACTGCAGCTAGGACATCTCCTCCGGTTGATCTCTTTGCTGCAACCACAACCGCTCCAACCCATACAATCAGAGACGAGGAACAGAATGTCACAGTTTGGAACATACCGGTTCCAACTCCTTTTATCAATGCTTCTCCCCTGCTTAGTACTAATTGTCTCTCCAGCCGTTCTATAAAGGATTTGACTGCAGAATTTTCTCCTACAAATGCATAAACTGTTTTGATTTGGGAAATAGTCTGCTGAACCATTGTTGTGGTTTCGGACAAAAATGATGTCTTT…	-	KOG0055, KOG0055, KOG0055, Multidrug/pheromone exporter, ABC superfamily [Secondary metabolites biosynthesis, transport and catabolism]. 5.9891e-12	gi|1021034459|gb|KZM92243.1| hypothetical protein DCAR_020392 [Daucus carota subsp. sativus] 2.4e-57	gi|657946088|ref|XM_008384764.1| PREDICTED: Malus x domestica ABC transporter B family member 19-like (LOC103445738), mRNA 3.06677e-51	pfam00664, ABC_membrane, ABC transporter transmembrane region. This family represents a unit of six transmembrane helices. Many members of the ABC transporter family (pfam00005) have two such regions. 2.55104e-06	sp|Q9C7F8|AB13B_ARATH ABC transporter B family member 13 OS=Arabidopsis thaliana GN=ABCB13 PE=3 SV=1 4.94882e-16	tr|A0A0R0JN77|A0A0R0JN77_SOYBN Uncharacterized protein OS=Glycine max GN=GLYMA_06G139500 PE=4 SV=1 9.3e-46	GO:0005524, ATP binding;GO:0016021, integral component of membrane;GO:0042626, ATPase activity, coupled to transmembrane movement of substances;GO:0055085, transmembrane transport	-
TRINITY_DN86296_c0_g1	AGGTGAGAAGTATCAGAATGCCACCATAAAAGGCCGGAAAGAATGGAAACAGACATGACTTGGAAAATTCGGAGACCTGAATAAGATTCATGTTTTCTTTCTCTCAAACCCCTTACAAGCAACACCTTAAATTGCAACCACCAACTAGTTGTCCATTGATTGTCAGATCCTGCAGGGGTCGACACAACTCTATCAATATATAAACCTATGGAAAATCATTAATATTTGTCTCACAGTTTAAATGTGTGCGTAGTTGAGTTGATGAATGTGCTTACTTCTTGCGGCTAATGGTCCTCCTGGAGGGTCTTGAAAAGTCCTAGCAATCTCGTCCTTCAAGCAAGGATCGTTGTTCTTCTTGTAAGACGCTACTAATGATTTTTTAATTGAATTTTGATCATC…	PLN03211, PLN03211, ABC transporter G-25; Provisional. 4.59375e-97	KOG0061, KOG0061, KOG0061, Transporter, ABC superfamily (Breast cancer resistance protein) [Secondary metabolites biosynthesis, transport and catabolism]. 1.0968e-79	gi|1021028783|gb|KZM86568.1| hypothetical protein DCAR_023702 [Daucus carota subsp. sativus] 2.4e-176	gi|334186959|ref|NM_118876.4| Arabidopsis thaliana ABC transporter G family member 9 mRNA, complete cds 5.63682e-35	pfam00005, ABC_tran, ABC transporter. ABC transporters for a large family of proteins responsible for translocation of a variety of compounds across biological membranes. ABC transporters are the largest family of proteins in many completely sequenced bacteria. ABC transporters are composed of two copies of this domain and two copies of a transmembrane domain pfam00664. These four domains may bel…	sp|Q7XA72|AB21G_ARATH ABC transporter G family member 21 OS=Arabidopsis thaliana GN=ABCG21 PE=2 SV=2 5.02364e-141	tr|B9SEG2|B9SEG2_RICCO ATP-binding cassette transporter, putative OS=Ricinus communis GN=RCOM_0704130 PE=4 SV=1 2.2e-129	GO:0005524, ATP binding;GO:0005886, plasma membrane;GO:0015416, ATPase-coupled organic phosphonate transmembrane transporter activity;GO:0016021, integral component of membrane;GO:0042626, ATPase activity, coupled to transmembrane movement of substances	-
TRINITY_DN86252_c1_g1	CTTCCTAAAGGTCTGGACAAGGAAACAACTCATCGTTATGGTCTCAACACCTTTAAATTGCATAGGCTACCAACTCCTAAGCCGGGGCAAGTTCTTGGTCTGGTTGGCACAAATGGCATCGGGAAGTCAACTGCCCTCAAAGTTTTAGCTGGGAAATTGAAACCTAATCTTGGTCGTTTCAATAACCCTCCTGATTGGAAAGATATTTTGGCGTACTTCAGAGGTTCTGAGTTGCAAAAATATTTCACCCGTATCCTGGAAGATAAATTTAAGGCA	cd03236, ABC_RNaseL_inhibitor_domain1, The ATP-binding cassette domain 1 of RNase L inhibitor. The ABC ATPase, RNase L inhibitor (RLI), is a key enzyme in ribosomal biogenesis, formation of translation preinitiation complexes, and assembly of HIV capsids. RLI s are not transport proteins and thus cluster with a group of soluble proteins that lack the transmembrane components commonly found in oth…	KOG0063, KOG0063, KOG0063, RNAse L inhibitor, ABC superfamily [RNA processing and modification]. 9.03964e-51	gi|976901842|gb|KVH89820.1| 4Fe-4S binding domain-containing protein [Cynara cardunculus var. scolymus] 5.2e-43	-	pfam00005, ABC_tran, ABC transporter. ABC transporters for a large family of proteins responsible for translocation of a variety of compounds across biological membranes. ABC transporters are the largest family of proteins in many completely sequenced bacteria. ABC transporters are composed of two copies of this domain and two copies of a transmembrane domain pfam00664. These four domains may bel…	sp|Q8LPJ4|AB2E_ARATH ABC transporter E family member 2 OS=Arabidopsis thaliana GN=ABCE2 PE=2 SV=1 2.48898e-50	tr|A0A103XFI7|A0A103XFI7_CYNCS 4Fe-4S binding domain-containing protein OS=Cynara cardunculus var. scolymus GN=Ccrd_008186 PE=4 SV=1 4.0e-43	GO:0005215, transporter activity;GO:0005524, ATP binding;GO:0016020, membrane;GO:0016887, ATPase activity;GO:0046872, metal ion binding;GO:0051539, 4 iron, 4 sulfur cluster binding	-
TRINITY_DN85855_c0_g1	TTTTTTCCATGTGATATTGGTTGCATGCCTGTTAAGATCTCTAAGAACACAACACCAAGGCTATAAACATCGCTTTTGTCTGTCAGTTTAATCCTCTCTGTTTTCCGTGGTTCTGTATCTTTACAATGCAATGACAATAAAGAGCTCTTCATTTTCACAAAGTTATCAAGAATAACAATTCCAGAAGAGAAAACATAGAAATTGGTGAGCGGAAAAAGGAAATTTTTATATGGTTGCGGTTGGCCTATCTAAACAAACCGGAGCTTTTAGTTTTAATCCTTGGCACAGTTGCAGCATGTATTAGTGGTGTGATTTTCCCTTTGTTTGGTTTATTAATCTCAAAGGCCATCAAGATCTTCTTTGAACCTCATTCTAAGTTGCGAAGGGATTCCAGATTTC…	pfam00664, ABC_membrane, ABC transporter transmembrane region. This family represents a unit of six transmembrane helices. Many members of the ABC transporter family (pfam00005) have two such regions. 9.15341e-15	KOG0055, KOG0055, KOG0055, Multidrug/pheromone exporter, ABC superfamily [Secondary metabolites biosynthesis, transport and catabolism]. 1.53356e-59	gi|1021026831|gb|KZM84618.1| hypothetical protein DCAR_027960 [Daucus carota subsp. sativus] 1.1e-61	gi|731404943|ref|XM_010657312.1| PREDICTED: Vitis vinifera ABC transporter B family member 9-like (LOC100253815), transcript variant X2, mRNA 8.47499e-66	pfam00664, ABC_membrane, ABC transporter transmembrane region. This family represents a unit of six transmembrane helices. Many members of the ABC transporter family (pfam00005) have two such regions. 1.89121e-15	sp|Q9M0M2|AB9B_ARATH ABC transporter B family member 9 OS=Arabidopsis thaliana GN=ABCB9 PE=3 SV=2 9.43159e-101	tr|A0A078FRE2|A0A078FRE2_BRANA BnaA08g27160D protein OS=Brassica napus GN=BnaA08g27160D PE=4 SV=1 3.3e-53	GO:0005524, ATP binding;GO:0016021, integral component of membrane;GO:0042626, ATPase activity, coupled to transmembrane movement of substances;GO:0055085, transmembrane transport	-
TRINITY_DN84211_c1_g1	GTTCTGGCACTTATGGGACCATCAGGAAGTGGAAAAACTACACTTTTAAGTGTTCTAGGAGGCAGGGTGGGTGAAACCAACCAAAGGGGTTCAATCACTTATAATGATCAGCCGTATACAAAGTTTCTGAAGAGCAGGATAGGATTTGTGACACAAGATGACGTACTGTTTCCTCATCTTACAGTGAAGGAAACATTAACATATGCAGCCCTACTACGTTTACCAAAGACGCTAACGAAACAAGAAAAGGAGCAACGGGCCACAGATGTAATCTCTGAACTTGGCTTGGAGAGGTGTCAAGACAGCATGATAGGTGGTTCATATGTCAGGGGAATTTCAGGCGGAGAGAGGAAGCGTGTTTGCATTGGAAACGAGATCATTATTAATCCTTCCCTTTTG…	PLN03211, PLN03211, ABC transporter G-25; Provisional. 7.63998e-138	KOG0061, KOG0061, KOG0061, Transporter, ABC superfamily (Breast cancer resistance protein) [Secondary metabolites biosynthesis, transport and catabolism]. 1.08979e-74	gi|1021035880|gb|KZM93663.1| hypothetical protein DCAR_016908 [Daucus carota subsp. sativus] 3.9e-223	gi|951025003|ref|XM_014658081.1| PREDICTED: Vigna radiata var. radiata ABC transporter G family member 22-like (LOC106771986), mRNA 0.0	pfam00005, ABC_tran, ABC transporter. ABC transporters for a large family of proteins responsible for translocation of a variety of compounds across biological membranes. ABC transporters are the largest family of proteins in many completely sequenced bacteria. ABC transporters are composed of two copies of this domain and two copies of a transmembrane domain pfam00664. These four domains may bel…	sp|Q93YS4|AB22G_ARATH ABC transporter G family member 22 OS=Arabidopsis thaliana GN=ABCG22 PE=1 SV=1 0.0	tr|U5FN34|U5FN34_POPTR Uncharacterized protein OS=Populus trichocarpa GN=POPTR_0016s06620g PE=4 SV=1 6.7e-199	GO:0005524, ATP binding;GO:0005886, plasma membrane;GO:0009414, response to water deprivation;GO:0010148, transpiration;GO:0016021, integral component of membrane;GO:0016887, ATPase activity;GO:0042626, ATPase activity, coupled to transmembrane movement of substances	-
TRINITY_DN83637_c1_g5	GGCAACCGCAGCCATGCTGAGTACAGCAAGGACTCGTACACGGTTACATGAGGCGAGTGGATGTCATTCTGCTCACAGTACCCGGCTATCCGAGCAAAAGTCTCCTGCTTCTTTGGATACCCAGAAACCGTAATGTTACCCTCAATGTATCCACCAGTTTTACGACCAGCCAGAACATCCATCAAAGTAGTTTTACCAGCACCACTAACACCCATTAGAGCAGTAAGAACACCTGGCCTGAAAGCTCCACTCACACCCTTTAGAAGTAATA	PLN03140, PLN03140, ABC transporter G family member; Provisional. 6.8831e-48	KOG0065, KOG0065, KOG0065, Pleiotropic drug resistance proteins (PDR1-15), ABC superfamily [Secondary metabolites biosynthesis, transport and catabolism]. 1.67124e-41	gi|1021031436|gb|KZM89221.1| hypothetical protein DCAR_026296 [Daucus carota subsp. sativus] 7.8e-44	gi|530354315|gb|KC013237.1| Panax ginseng pleiotropic drug resistance transporter 2 (PDR2) mRNA, complete cds 8.61495e-89	pfam00005, ABC_tran, ABC transporter. ABC transporters for a large family of proteins responsible for translocation of a variety of compounds across biological membranes. ABC transporters are the largest family of proteins in many completely sequenced bacteria. ABC transporters are composed of two copies of this domain and two copies of a transmembrane domain pfam00664. These four domains may bel…	sp|Q8GU88|AB39G_ORYSJ ABC transporter G family member 39 OS=Oryza sativa subsp. japonica GN=ABCG39 PE=3 SV=1 2.07113e-53	tr|A0A096VPM7|A0A096VPM7_PANGI Pleiotropic drug resistance transporter 1 OS=Panax ginseng GN=PDR1 PE=2 SV=1 1.3e-43	GO:0005524, ATP binding;GO:0005886, plasma membrane;GO:0006810, transport;GO:0016021, integral component of membrane;GO:0016887, ATPase activity;GO:0042626, ATPase activity, coupled to transmembrane movement of substances	-
TRINITY_DN83561_c3_g2	TCTCCAATTCCAAATATATCACTTTAAAGGTTTCTACTTTAAACGGGTTCTATTGTATTTCTCCTCTTTCAACCTTACTGTTCTGCACTTTACTTTTCATATTTCCATGTGAAAATATGGCCTCATGTTTAAAGAACAGCAAAAACTGAGAAAGTTTTATTATTCTCATGTATGACTGCTATAAATATTCATCTTTTACATGTAAAATGCAGTGACCTTTATACATCATTTCTAGCTTACTGTCTGGAGCTATTTACAATTCTCAGAATCCCTTCAACATTACAACTCTATATATTGTAACAAACATACCAGTTGGTATAACTACCAAGTTATGGATTTCTTCAAGATCTAACACCTTTGACATTCTGCAGATACGCATGATCGTGTCGAAGCTGGAAA…	PLN03211, PLN03211, ABC transporter G-25; Provisional. 4.1318e-53	KOG0061, KOG0061, KOG0061, Transporter, ABC superfamily (Breast cancer resistance protein) [Secondary metabolites biosynthesis, transport and catabolism]. 1.78515e-53	gi|1021047459|gb|KZN05239.1| hypothetical protein DCAR_006076 [Daucus carota subsp. sativus] 0.0e+00	gi|1025326710|ref|XM_016649732.1| PREDICTED: Nicotiana tabacum ABC transporter G family member 28-like (LOC107823136), mRNA 0.0	pfam00005, ABC_tran, ABC transporter. ABC transporters for a large family of proteins responsible for translocation of a variety of compounds across biological membranes. ABC transporters are the largest family of proteins in many completely sequenced bacteria. ABC transporters are composed of two copies of this domain and two copies of a transmembrane domain pfam00664. These four domains may bel…	sp|Q9FF46|AB28G_ARATH ABC transporter G family member 28 OS=Arabidopsis thaliana GN=ABCG28 PE=3 SV=1 0.0	tr|A0A068UHG1|A0A068UHG1_COFCA Uncharacterized protein OS=Coffea canephora GN=GSCOC_T00024185001 PE=4 SV=1 0.0e+00	GO:0005524, ATP binding;GO:0005886, plasma membrane;GO:0016021, integral component of membrane;GO:0016887, ATPase activity;GO:0042626, ATPase activity, coupled to transmembrane movement of substances	-
TRINITY_DN83367_c1_g2	TGCACTTGGACAGGTGGTTCAAAACACAGCTTCAGCAGTGGCTGGCCTGGTCATTGCTTTTGTAGCATGTTGGCAGTTGGCATTCATTGTCGTTGCTCTGCTACCGTTAATTGGACTCAGCAACTATATTCAAGTGAAATTCATGACAGGATTCAGCGCAGATGCCAAGCTGATGTATGAAGATGCCAGCCAAGTTGCCAATGATGCAGTTGGAAGTATAAGAACAGTTGCTTCTTTCTGTGCTGAAGATAAAGTCATGGAGTTGTACAAACAGAAATGTGAAGGTCCCATGAAGACAGGAATCAGGCAAGGACTGATTAGTGGGATCGGGTTCGGGGTGTCATTCGCCTTACTGTTTTGTGTTTATGCTACATGTTTTTATGCTGGAGCACGGCTTGT…	cd03249, ABC_MTABC3_MDL1_MDL2, ATP-binding cassette domain of a mitochondrial protein MTABC3 and related proteins. MTABC3 (also known as ABCB6) is a mitochondrial ATP-binding cassette protein involved in iron homeostasis and one of four ABC transporters expressed in the mitochondrial inner membrane, the other three being MDL1(ABC7), MDL2, and ATM1. In fact, the yeast MDL1 (multidrug resistance-li…	KOG0055, KOG0055, KOG0055, Multidrug/pheromone exporter, ABC superfamily [Secondary metabolites biosynthesis, transport and catabolism]. 7.42397e-85	gi|1021052501|gb|KZN10279.1| hypothetical protein DCAR_002935 [Daucus carota subsp. sativus] 9.8e-154	gi|731395942|ref|XM_010654038.1| PREDICTED: Vitis vinifera ABC transporter B family member 11 (LOC100267452), transcript variant X2, mRNA 2.638e-180	pfam00664, ABC_membrane, ABC transporter transmembrane region. This family represents a unit of six transmembrane helices. Many members of the ABC transporter family (pfam00005) have two such regions. 1.59096e-16	sp|Q9FWX7|AB11B_ARATH ABC transporter B family member 11 OS=Arabidopsis thaliana GN=ABCB11 PE=2 SV=1 6.66979e-162	tr|F6HZG2|F6HZG2_VITVI Putative uncharacterized protein OS=Vitis vinifera GN=VIT_07s0005g02660 PE=4 SV=1 1.2e-140	GO:0005524, ATP binding;GO:0005886, plasma membrane;GO:0009506, plasmodesma;GO:0010329, auxin efflux transmembrane transporter activity;GO:0010540, basipetal auxin transport;GO:0016021, integral component of membrane;GO:0042626, ATPase activity, coupled to transmembrane movement of substances;GO:0055085, transmembrane transport	K05658-ko04976 Bile secretion;ko02010 ABC transporters
TRINITY_DN83034_c0_g1	CCTACTCTTTTTCAAAACCGAAATACGGCTAGAGAAAGAGATGAAGTTGAGTCGATATATATATATATAAAACAATTTTTTCACGATCTTCGGTCCTTCGGATGTTAGCCTTACTTGATATTACCCAAGTGACCCATGCCGTATAGTAGAGATTGAATGAGAAATGCATTGAAGTATTCGTTTAACTTCATAATTTACCATTTTAAACATAGCTTATAAGGTCGAACCCAGAATCGAACTAGGGCTGAGAGGACAGGTCTTTTGAAATGACAAAAGGATCCTTGAATGATGCTAAACAAGATGTCCGAATTCTTGAAGAACCCCTTTTGAATCAGGGTAATAGTAGTAGTGTCAGAGGTTGTGATACTGTCACTCCTTACGAAAATGCCAGTCTTTTCG…	TIGR00957, Multidrug_resistance-associated_protein_1, multi drug resistance-associated protein (MRP). This model describes multi drug resistance-associated protein (MRP) in eukaryotes. The multidrug resistance-associated protein is an integral membrane protein that causes multidrug resistance when overexpressed in mammalian cells. It belongs to ABC transporter superfamily. The protein topology an…	KOG0054, KOG0054, KOG0054, Multidrug resistance-associated protein/mitoxantrone resistance protein, ABC superfamily [Secondary metabolites biosynthesis, transport and catabolism]. 2.93149e-106	gi|902205072|gb|KNA15079.1| hypothetical protein SOVF_101510 isoform A [Spinacia oleracea] 4.3e-246	gi|731335308|ref|XM_010680359.1| PREDICTED: Beta vulgaris subsp. vulgaris ABC transporter C family member 3-like (LOC104894183), mRNA 0.0	pfam00005, ABC_tran, ABC transporter. ABC transporters for a large family of proteins responsible for translocation of a variety of compounds across biological membranes. ABC transporters are the largest family of proteins in many completely sequenced bacteria. ABC transporters are composed of two copies of this domain and two copies of a transmembrane domain pfam00664. These four domains may bel…	sp|Q9LK64|AB3C_ARATH ABC transporter C family member 3 OS=Arabidopsis thaliana GN=ABCC3 PE=1 SV=1 0.0	tr|A0A0K9R7W6|A0A0K9R7W6_SPIOL Uncharacterized protein OS=Spinacia oleracea GN=SOVF_101510 PE=4 SV=1 3.3e-246	GO:0000325, plant-type vacuole;GO:0005524, ATP binding;GO:0005773, vacuole;GO:0005774, vacuolar membrane;GO:0008559, xenobiotic transmembrane transporting ATPase activity;GO:0009506, plasmodesma;GO:0010290, chlorophyll catabolite transmembrane transporter activity;GO:0015431, glutathione S-conjugate-exporting ATPase activity;GO:0016021, integral component of membrane;GO:0042626, ATPase activity, …	-
TRINITY_DN82887_c1_g2	AATTAGTTGCATTTTCAAAGGAGGGCATAGTATTGGAATAGTGGGCAGGACTGGTAGTGGGAAGACAACTTTGATTAGTGCATTGTTTCGCCTCGTAGAACCTGCAGAAGGAAAGATCATAGTAGATAATATAAATATCTCTGAAATCGGGCTTCATGACCTCAGATCACATATTGGCATCATTCCACAAGATCCGACACTTTTCAGTGGTTCTGTGAGATATAACATAGACCCCCTGTTCGAGCATACTGATAGTGAAATTTGGCAGGTTCTTGAGAAATGTCACCTTGGAGAGGCTGTTCAAGAGAAAGAAAAAGGGTTGAACTCCTTGGTTGTTCAGGATGGTTCAAACTGGAGCATGGGACAGCGCCAGTTAATTTGCTTGGGACGAGCATTATT…	cd03244, ABCC_MRP_domain2, ATP-binding cassette domain 2 of multidrug resistance-associated protein. The ABC subfamily C is also known as MRP (multidrug resistance-associated protein). Some of the MRP members have five additional transmembrane segments in their N-terminus, but the function of these additional membrane-spanning domains is not clear. The MRP was found in the multidrug-resistance lu…	KOG0054, KOG0054, KOG0054, Multidrug resistance-associated protein/mitoxantrone resistance protein, ABC superfamily [Secondary metabolites biosynthesis, transport and catabolism]. 5.40965e-65	gi|590678867|ref|XP_007040421.1| Multidrug resistance-associated protein 14, putative [Theobroma cacao] 5.8e-80	gi|719985967|ref|XM_010253256.1| PREDICTED: Nelumbo nucifera ABC transporter C family member 10-like (LOC104593424), transcript variant X6, mRNA 3.74105e-90	pfam00005, ABC_tran, ABC transporter. ABC transporters for a large family of proteins responsible for translocation of a variety of compounds across biological membranes. ABC transporters are the largest family of proteins in many completely sequenced bacteria. ABC transporters are composed of two copies of this domain and two copies of a transmembrane domain pfam00664. These four domains may bel…	sp|Q9LYS2|AB10C_ARATH ABC transporter C family member 10 OS=Arabidopsis thaliana GN=ABCC10 PE=2 SV=2 1.00283e-88	tr|A0A061G6V3|A0A061G6V3_THECC Multidrug resistance-associated protein 14, putative OS=Theobroma cacao GN=TCM_016389 PE=4 SV=1 4.4e-80	GO:0005524, ATP binding;GO:0005774, vacuolar membrane;GO:0008559, xenobiotic transmembrane transporting ATPase activity;GO:0016021, integral component of membrane;GO:0042626, ATPase activity, coupled to transmembrane movement of substances	-
TRINITY_DN81698_c0_g1	GTTACAAAAACAACCCAGTTATGCTAGGCATATAACTATTAGGTGGAAATCGATTGCGCGAAGACAGTTTAAAGAACAGAACAAGTTTCTTTGCTTCTAAACTGGAACATTCACAAGGAAAGTGTCTCTCTAAGCAGCTCTTCAGAAACTTATAAAACAATACTGGAAAGATAGAAATGTAATGAAGAGCTAAATATAGTTAATTTTGAATCAGAATCTTGCTGGCAGATACGTATATTCAACGAGCAAGAGAGGTAGATAGCATTCACAAGGGAGGACCACACTTGAAGCAAGCACGTGGGGGAATTTTTCGAACTCATGCAGATTGTTCTTCATTTCCAGATTTAACTTTTGCAGTTAAAAACTTAAAAATGAACACTAAATTGTCCAGAAAATTTA…	cd03213, ABCG_EPDR, Eye pigment and drug resistance transporter subfamily G of the ATP-binding cassette superfamily. ABCG transporters are involved in eye pigment (EP) precursor transport, regulation of lipid-trafficking mechanisms, and pleiotropic drug resistance (DR). DR is a well-described phenomenon occurring in fungi and shares several similarities with processes in bacteria and higher eukar…	KOG0061, KOG0061, KOG0061, Transporter, ABC superfamily (Breast cancer resistance protein) [Secondary metabolites biosynthesis, transport and catabolism]. 9.11984e-32	gi|1021048665|gb|KZN06445.1| hypothetical protein DCAR_007282 [Daucus carota subsp. sativus] 1.7e-75	gi|731369756|ref|XM_002284058.2| PREDICTED: Vitis vinifera ABC transporter G family member 7 (LOC100264613), transcript variant X2, mRNA 1.35411e-74	pfam00005, ABC_tran, ABC transporter. ABC transporters for a large family of proteins responsible for translocation of a variety of compounds across biological membranes. ABC transporters are the largest family of proteins in many completely sequenced bacteria. ABC transporters are composed of two copies of this domain and two copies of a transmembrane domain pfam00664. These four domains may bel…	sp|Q9ZU35|AB7G_ARATH ABC transporter G family member 7 OS=Arabidopsis thaliana GN=ABCG7 PE=2 SV=1 2.32013e-67	tr|D7T8V5|D7T8V5_VITVI Putative uncharacterized protein OS=Vitis vinifera GN=VIT_01s0011g04670 PE=4 SV=1 3.3e-63	GO:0005524, ATP binding;GO:0005886, plasma membrane;GO:0009507, chloroplast;GO:0009941, chloroplast envelope;GO:0016021, integral component of membrane;GO:0042626, ATPase activity, coupled to transmembrane movement of substances	-
TRINITY_DN81304_c0_g1	GTTTTATTAAATTTGGTGTGTCGTTTGTATGTTAAATTGATTTGTATTTAAGCAAGCCATAGATGTACAAATGCCAGAGACATTATCATATTGTTGTTTTTGAAACCCTTCGTGCAAGTATGATCCAACAAAGTACCCTATAAAAGACAAAGAAACCAAACATAATCCCCACATTCATCCACCTTGTGTCCTTGTCAAGTCCTCTACTCCTCAAAACGTCAATTCCTCTTTGCAAACATATGGTATGATCATGAACATCTGGCGAGAAACATTTATCTCTTGCACTCCAGTACTCGTTTACAAGCAAAAAATCTAAAGGATACCTGTAAAGGGAGACATAGTACATGAACATCCAATACTTTGGTATGCTTTCTTTTGGTATGAAATAGCCGGAGAAGA…	TIGR00955, Protein_white, The Eye Pigment Precursor Transporter (EPP) Family protein. [Transport and binding proteins, Other]. 3.79437e-66	KOG0061, KOG0061, KOG0061, Transporter, ABC superfamily (Breast cancer resistance protein) [Secondary metabolites biosynthesis, transport and catabolism]. 2.38043e-81	gi|1021029490|gb|KZM87275.1| hypothetical protein DCAR_024409 [Daucus carota subsp. sativus] 7.8e-301	gi|731393532|ref|XM_002276005.2| PREDICTED: Vitis vinifera ABC transporter G family member 23 (LOC100243136), mRNA 1.49005e-129	pfam00005, ABC_tran, ABC transporter. ABC transporters for a large family of proteins responsible for translocation of a variety of compounds across biological membranes. ABC transporters are the largest family of proteins in many completely sequenced bacteria. ABC transporters are composed of two copies of this domain and two copies of a transmembrane domain pfam00664. These four domains may bel…	sp|Q3E9B8|AB23G_ARATH ABC transporter G family member 23 OS=Arabidopsis thaliana GN=ABCG23 PE=2 SV=1 0.0	tr|M5WK71|M5WK71_PRUPE Uncharacterized protein OS=Prunus persica GN=PRUPE_ppa022225mg PE=4 SV=1 3.0e-228	GO:0005524, ATP binding;GO:0005886, plasma membrane;GO:0016021, integral component of membrane;GO:0016887, ATPase activity;GO:0042626, ATPase activity, coupled to transmembrane movement of substances	-
TRINITY_DN80626_c2_g1	CTTGCGATTGCTACTCTTTGTTTCTGACCTCCTGAAAGCCTTACTCCACGTTCTCCAACAAAAGTCTGGTATCCTTCAGGGAATTTGGATACGAATTCATGGGCATTTGCCATTTTCTGCAATTCACAAAAAACAATAATTAGTTACTTCTTTGGCACAGTGCTCTGTGAAGATTCTGATCTATTAAAAGCTTACAGCTGCATTTTCCACATCAACACTGCTTGCTTCGCCATCGAACCCATAGGCAATATTATCATGAATGGAGCAGTTGAAAAGCACCGGTTCTTGGCTTACTATACTGATCTAAATTTCGAATAAAATATGGTTAGCTACGGTGATTTTAAGTCCCGAAGATGGACTTTGAATTTCAAGAACATAATTAAAGTTCTGCTGGGAATA…	TIGR00958, Antigen_peptide_transporter_2, Conjugate Transporter-2 (CT2) Family protein. [Transport and binding proteins, Other]. 3.81431e-37	KOG0058, KOG0058, KOG0058, Peptide exporter, ABC superfamily [Intracellular trafficking, secretion, and vesicular transport]. 2.25323e-62	gi|1021045024|gb|KZN02805.1| hypothetical protein DCAR_011561 [Daucus carota subsp. sativus] 4.0e-110	gi|731426032|ref|XM_002265658.3| PREDICTED: Vitis vinifera ABC transporter B family member 25 (LOC100248338), mRNA 8.04841e-169	pfam00664, ABC_membrane, ABC transporter transmembrane region. This family represents a unit of six transmembrane helices. Many members of the ABC transporter family (pfam00005) have two such regions. 1.75239e-29	sp|Q9FNU2|AB25B_ORYSJ ABC transporter B family member 25 OS=Oryza sativa subsp. japonica GN=OsABCB25 PE=2 SV=1 3.35974e-118	tr|A0A067FEE8|A0A067FEE8_CITSI Uncharacterized protein OS=Citrus sinensis GN=CISIN_1g006489mg PE=4 SV=1 3.4e-101	GO:0005524, ATP binding;GO:0005774, vacuolar membrane;GO:0016021, integral component of membrane;GO:0042626, ATPase activity, coupled to transmembrane movement of substances;GO:0055085, transmembrane transport	-
TRINITY_DN80228_c2_g1	GACAGTAATAGGTGAGAGGGGAATCAATTTAAGCGGGGGTCAGAAGCAGAGAATACAAATTGCTCGTGCTCTCTACCAAGATGCAGATATATATCTATTTGATGATCCATTTAGTGCTGTGGATGTTCATACAGGATCGCATCTTTTCAAGGAGTGCATACAGGGAATTCTGGAGTCAAAAACAGTGATATATGTCACTCATCAAGTAGAGTTTCTACCTGCAGCAGACCTCATACTTGTGAGATAGGATCTTACTCTATAACTTCTTTTATACTAATTAATGTAAATTTTATCAATAAATCGTTTCTAATTAGGTGATGAAAGATGGCTGTATTACACAATCTGGAAACTATGGTGAAGTACTTAACTTGGGGAGCGAATTTATGGAACTTGTGGTTG…	TIGR00957, Multidrug_resistance-associated_protein_1, multi drug resistance-associated protein (MRP). This model describes multi drug resistance-associated protein (MRP) in eukaryotes. The multidrug resistance-associated protein is an integral membrane protein that causes multidrug resistance when overexpressed in mammalian cells. It belongs to ABC transporter superfamily. The protein topology an…	KOG0054, KOG0054, KOG0054, Multidrug resistance-associated protein/mitoxantrone resistance protein, ABC superfamily [Secondary metabolites biosynthesis, transport and catabolism]. 1.14493e-91	gi|1021036061|gb|KZM93844.1| hypothetical protein DCAR_017089 [Daucus carota subsp. sativus] 1.0e-171	gi|1027097277|ref|XM_008228899.2| PREDICTED: Prunus mume ABC transporter C family member 3-like (LOC103326655), mRNA 2.12892e-146	pfam00664, ABC_membrane, ABC transporter transmembrane region. This family represents a unit of six transmembrane helices. Many members of the ABC transporter family (pfam00005) have two such regions. 3.35725e-12	sp|Q9LK64|AB3C_ARATH ABC transporter C family member 3 OS=Arabidopsis thaliana GN=ABCC3 PE=1 SV=1 3.9456e-168	tr|V4TYY2|V4TYY2_9ROSI Uncharacterized protein OS=Citrus clementina GN=CICLE_v10007266mg PE=4 SV=1 1.4e-139	GO:0000325, plant-type vacuole;GO:0005524, ATP binding;GO:0005773, vacuole;GO:0005774, vacuolar membrane;GO:0008559, xenobiotic transmembrane transporting ATPase activity;GO:0009506, plasmodesma;GO:0010290, chlorophyll catabolite transmembrane transporter activity;GO:0015431, glutathione S-conjugate-exporting ATPase activity;GO:0016021, integral component of membrane;GO:0042626, ATPase activity, …	-
TRINITY_DN80147_c1_g1	GCAATCGAAAGGTATTCCAGAAAAGAGATTGCAACTGCTGTCAAAAGTAAGTGGGGTATTTTCACCTGGAGTCCTTACTGCATTAGTTGGGTCAAGTGGGGCGGGAAAGACTACTTTGATGGATGTGCTTGCTGGTAGGAAGACTGGTGGAGACATAGAAGGGGACATTAGGATATCTGGTCACCCTAAAGAACAACGTACTTTTGCAAGAGTTTCAGGATATGTTGAA	PLN03140, PLN03140, ABC transporter G family member; Provisional. 9.04652e-34	KOG0065, KOG0065, KOG0065, Pleiotropic drug resistance proteins (PDR1-15), ABC superfamily [Secondary metabolites biosynthesis, transport and catabolism]. 3.24382e-31	gi|1021048755|gb|KZN06535.1| hypothetical protein DCAR_007372 [Daucus carota subsp. sativus] 1.7e-31	gi|731391862|ref|XM_010652605.1| PREDICTED: Vitis vinifera ABC transporter G family member 31 (LOC100265583), transcript variant X2, mRNA 2.05811e-59	pfam00005, ABC_tran, ABC transporter. ABC transporters for a large family of proteins responsible for translocation of a variety of compounds across biological membranes. ABC transporters are the largest family of proteins in many completely sequenced bacteria. ABC transporters are composed of two copies of this domain and two copies of a transmembrane domain pfam00664. These four domains may bel…	sp|Q7PC88|AB31G_ARATH ABC transporter G family member 31 OS=Arabidopsis thaliana GN=ABCG31 PE=1 SV=1 7.9941e-39	tr|R0HML1|R0HML1_9BRAS Uncharacterized protein OS=Capsella rubella GN=CARUB_v10022508mg PE=3 SV=1 3.8e-31	GO:0005524, ATP binding;GO:0005886, plasma membrane;GO:0006810, transport;GO:0006855, drug transmembrane transport;GO:0009506, plasmodesma;GO:0016021, integral component of membrane;GO:0016887, ATPase activity;GO:0042626, ATPase activity, coupled to transmembrane movement of substances	-
TRINITY_DN79696_c0_g3	CACAAGCCTATTAGCTTTGAATATAAATTAATCAATAATAAAATATGTATTTGCTATTCATTAGTAAAAATTCTGATCATACATATATCTGCAATACTGCAAGAGTAAAATCAGCCAAAGAAGTGCAACAGAATATCGAAGTTTATCAACAAGAATTATCATTTCTCACTTCTATTAGTACACAGGCCAAACTTGAGTTTCGTGACTTCTTCTGAAGCTTCTATAATTAGGCCATAGGAGAACTAAGCCCCTCTTGAGATGACAATGAATGAAGATTAGAGTGCCTCTTGGAAATTATGGAAGGTTTTCTCTTGAATGAAGGCCTCTGGTTGAGTCGATACAGACTTCTTTTAGCATAAAGGGACCGGAAATAAGGTGCAGCTCTTTCATTTACTTTCA…	TIGR00955, Protein_white, The Eye Pigment Precursor Transporter (EPP) Family protein. [Transport and binding proteins, Other]. 1.36463e-85	KOG0061, KOG0061, KOG0061, Transporter, ABC superfamily (Breast cancer resistance protein) [Secondary metabolites biosynthesis, transport and catabolism]. 1.16588e-100	gi|1021024610|gb|KZM82398.1| hypothetical protein DCAR_029967 [Daucus carota subsp. sativus] 0.0e+00	gi|1026098137|ref|XM_016692717.1| PREDICTED: Capsicum annuum ABC transporter G family member 15-like (LOC107848057), mRNA 0.0	pfam00005, ABC_tran, ABC transporter. ABC transporters for a large family of proteins responsible for translocation of a variety of compounds across biological membranes. ABC transporters are the largest family of proteins in many completely sequenced bacteria. ABC transporters are composed of two copies of this domain and two copies of a transmembrane domain pfam00664. These four domains may bel…	sp|Q8RWI9|AB15G_ARATH ABC transporter G family member 15 OS=Arabidopsis thaliana GN=ABCG15 PE=2 SV=2 0.0	tr|A0A068UNU8|A0A068UNU8_COFCA Uncharacterized protein OS=Coffea canephora GN=GSCOC_T00028573001 PE=4 SV=1 9.6e-307	GO:0005524, ATP binding;GO:0005886, plasma membrane;GO:0016021, integral component of membrane;GO:0016887, ATPase activity;GO:0042626, ATPase activity, coupled to transmembrane movement of substances;GO:0080167, response to karrikin	-
TRINITY_DN79609_c0_g1	CTCGTCTAGAAGAAGTATTTTGGGATTTTTTACTATGGCACGTGCAATGGCCACACGCTGCTTCTGTCCACCAGATAGCTGTATACCTCTCTCCCCTACTACAGTATCATAACCCTGTTGTAACCCACAAATGAAATTGTGGGCATTAGCCAACGTCGATGCGTTCATTATTTCTGCTTCAGTTGCACCTCCTTCCTTTCCATAAGCAATGTTAGCTCGAATTGTCTCATTAAACAATGCCGGTTCTTGACTTACAAGTCCCATTTGTTGCCTTAGCCACTTTACTTGGAATTTTTGTATCTCGATTCCATCAAGTATGATATGACCTGAATCTGGCTCATAAAATCTTTGCAGCAATGAGATTACAGTTGATTTGCCGCTTCCACTTTCTCCAACCAG…	PTZ00265, PTZ00265, multidrug resistance protein (mdr1); Provisional. 5.06463e-80	KOG0055, KOG0055, KOG0055, Multidrug/pheromone exporter, ABC superfamily [Secondary metabolites biosynthesis, transport and catabolism]. 0.0	gi|1021037218|gb|KZM95001.1| hypothetical protein DCAR_018243 [Daucus carota subsp. sativus] 0.0e+00	gi|699262773|gb|KM035286.1| Hevea brasiliensis ABC transporter family protein (ABCB11) mRNA, complete cds 1.56967e-159	pfam00005, ABC_tran, ABC transporter. ABC transporters for a large family of proteins responsible for translocation of a variety of compounds across biological membranes. ABC transporters are the largest family of proteins in many completely sequenced bacteria. ABC transporters are composed of two copies of this domain and two copies of a transmembrane domain pfam00664. These four domains may bel…	sp|Q9FWX7|AB11B_ARATH ABC transporter B family member 11 OS=Arabidopsis thaliana GN=ABCB11 PE=2 SV=1 0.0	tr|F6HZG2|F6HZG2_VITVI Putative uncharacterized protein OS=Vitis vinifera GN=VIT_07s0005g02660 PE=4 SV=1 1.6e-283	GO:0005524, ATP binding;GO:0005886, plasma membrane;GO:0009506, plasmodesma;GO:0010329, auxin efflux transmembrane transporter activity;GO:0010540, basipetal auxin transport;GO:0016021, integral component of membrane;GO:0042626, ATPase activity, coupled to transmembrane movement of substances;GO:0055085, transmembrane transport	-
TRINITY_DN79505_c1_g1	GTTTGGTAATTTTAAAAATAATTAAGTTTCTTATAAAGAAATGTTCCACTTTTCCAAACAGTCCTTAACTCACCACTAACAAACCTGAAGCAACCATTATACTATCATTTTAAAACAAACCCACCTTTTTTTCTTTACTTAAAAAGCTTTAATTTGATTAAATTAATGATTTTGGAGCCTCAAATCGATCTGGGTCACCCTCAAAATCCAAACTTTTGATTGCCCATTAGTCCAATTTTGCAAAAAGAACATGACTTGTTTGGTGAATCAATTGTTTTATCCTATAAAATTGAGCAATGTAACTTTTAGGGCTAATGAGTTAAATGCTTCTACTGGGCCAAGAAAATCATTTGGTTTGGTTAATTCTGGAAGGAGCATTGCTTGTTCTTGCGTTGCTTC…	cd03261, ABC_Org_Solvent_Resistant, ATP-binding cassette transport system involved in resistant to organic solvents. ABC transporters are a large family of proteins involved in the transport of a wide variety of different compounds, like sugars, ions, peptides, and more complex organic molecules. The nucleotide binding domain shows the highest similarity between all members of the family. ABC tra…	KOG0055, KOG0055, KOG0055, Multidrug/pheromone exporter, ABC superfamily [Secondary metabolites biosynthesis, transport and catabolism]. 6.2008e-19	gi|747075235|ref|XP_011084646.1| PREDICTED: protein TRIGALACTOSYLDIACYLGLYCEROL 3, chloroplastic isoform X1 [Sesamum indicum] 6.7e-123	gi|720064494|ref|XM_010277668.1| PREDICTED: Nelumbo nucifera protein TRIGALACTOSYLDIACYLGLYCEROL 3, chloroplastic (LOC104610847), mRNA 2.71473e-173	pfam00005, ABC_tran, ABC transporter. ABC transporters for a large family of proteins responsible for translocation of a variety of compounds across biological membranes. ABC transporters are the largest family of proteins in many completely sequenced bacteria. ABC transporters are composed of two copies of this domain and two copies of a transmembrane domain pfam00664. These four domains may bel…	sp|Q9AT00|TGD3_ARATH Protein TRIGALACTOSYLDIACYLGLYCEROL 3, chloroplastic OS=Arabidopsis thaliana GN=TGD3 PE=1 SV=1 4.56529e-140	tr|A0A022RI78|A0A022RI78_ERYGU Uncharacterized protein OS=Erythranthe guttata GN=MIMGU_mgv1a008927mg PE=4 SV=1 2.8e-121	GO:0005215, transporter activity;GO:0005524, ATP binding;GO:0006869, lipid transport;GO:0009507, chloroplast;GO:0009536, plastid;GO:0009570, chloroplast stroma;GO:0016887, ATPase activity	-
TRINITY_DN79069_c0_g1	AGAAATGTTGTAGAAGGATTGAGGAAAGAAGAAGCAAGGTGGATATCCGCAATTCTGTCACAAAGAGGCTATTATCTAGCTCTCTTTTGGTCATCACCTATTGTAATATCAGTAGTTACTTTCTGGGCATGCTATCTGATGAGAATTCCTCTAGATGCTAGCAGTGTGTTTACATTTCTTGCAACAGTCCGTATTGTCCAAGAGCATATTAGGCTTATACCTGATGTTGTAGGAAGTTTCATCGAGGCAAAGGTTGCATTAACTCGTATTCTAAAGTTTCTTGAGGAACCTGAATTGCAAAAAAGAAGTGCAGAAGGTAATAGCAAGGAAATTGCACAGTCTATACTAATCAAAGAAGCAAGTTTTTCATGGGATATCAAATCTTCAAAGGTCACTTTG…	TIGR00957, Multidrug_resistance-associated_protein_1, multi drug resistance-associated protein (MRP). This model describes multi drug resistance-associated protein (MRP) in eukaryotes. The multidrug resistance-associated protein is an integral membrane protein that causes multidrug resistance when overexpressed in mammalian cells. It belongs to ABC transporter superfamily. The protein topology an…	KOG0054, KOG0054, KOG0054, Multidrug resistance-associated protein/mitoxantrone resistance protein, ABC superfamily [Secondary metabolites biosynthesis, transport and catabolism]. 2.15201e-93	gi|743843387|ref|XP_011026943.1| PREDICTED: ABC transporter C family member 10-like [Populus euphratica] 1.3e-128	gi|764581074|ref|XM_011465641.1| PREDICTED: Fragaria vesca subsp. vesca ABC transporter C family member 10-like (LOC101301195), transcript variant X4, mRNA 5.84748e-86	pfam00005, ABC_tran, ABC transporter. ABC transporters for a large family of proteins responsible for translocation of a variety of compounds across biological membranes. ABC transporters are the largest family of proteins in many completely sequenced bacteria. ABC transporters are composed of two copies of this domain and two copies of a transmembrane domain pfam00664. These four domains may bel…	sp|Q9LYS2|AB10C_ARATH ABC transporter C family member 10 OS=Arabidopsis thaliana GN=ABCC10 PE=2 SV=2 3.12134e-137	tr|B9GL97|B9GL97_POPTR Uncharacterized protein OS=Populus trichocarpa GN=POPTR_0001s10240g PE=4 SV=2 2.2e-128	GO:0005524, ATP binding;GO:0005774, vacuolar membrane;GO:0008559, xenobiotic transmembrane transporting ATPase activity;GO:0016021, integral component of membrane;GO:0042626, ATPase activity, coupled to transmembrane movement of substances	K05666-ko02010 ABC transporters;ko04976 Bile secretion
TRINITY_DN78982_c1_g1	AATCCTAATTTCAACCCATACAAAATAACACTCATTCACATTGGATGCTCGTTGTCGTCAATCAGCAAAGATTACAGATTAGTAAATTACATATATTAGATTAGAGTAAAGAGTTGTGGCTGAACGAATGACATTGTTTTTGCGTTTCAAAAGCGTGGTTACGGATCACTTTTTTGAACTATTTTTTTCTCAAAATGGTAGCCACGCTTTATGACTGGTTGTTATGTCATTCGTCTCACTCACCTGCTCCACTGATTTAGAGCAGATACAAGCTGTTTGTAATATATTATTGAAATCGTAAACGTGTTACGCATTTTCAAGTAAGGATTAGGGAAATCGTTAAAAGTAAAACAGAGTTCTATGTGTGTGTTTTTTTGGCAATTATTCACGTTTCAACCA…	cd03232, ABCG_PDR_domain2, Second domain of the pleiotropic drug resistance-like (PDR) subfamily G of ATP-binding cassette transporters. The pleiotropic drug resistance (PDR) is a well-described phenomenon occurring in fungi and shares several similarities with processes in bacteria and higher eukaryotes. This PDR subfamily represents domain I of its (ABC-IM)2 organization. ABC transporters are a…	KOG0061, KOG0061, KOG0061, Transporter, ABC superfamily (Breast cancer resistance protein) [Secondary metabolites biosynthesis, transport and catabolism]. 4.07262e-24	gi|1025017899|ref|XP_016441937.1| PREDICTED: ABC transporter G family member 11-like [Nicotiana tabacum] 5.1e-57	gi|764515863|ref|XM_011467071.1| PREDICTED: Fragaria vesca subsp. vesca ABC transporter G family member 11-like (LOC101299534), mRNA 1.9648e-37	pfam00005, ABC_tran, ABC transporter. ABC transporters for a large family of proteins responsible for translocation of a variety of compounds across biological membranes. ABC transporters are the largest family of proteins in many completely sequenced bacteria. ABC transporters are composed of two copies of this domain and two copies of a transmembrane domain pfam00664. These four domains may bel…	sp|Q8RXN0|AB11G_ARATH ABC transporter G family member 11 OS=Arabidopsis thaliana GN=ABCG11 PE=1 SV=1 1.74129e-34	tr|M1BEC9|M1BEC9_SOLTU Uncharacterized protein OS=Solanum tuberosum GN=PGSC0003DMG400016797 PE=4 SV=1 5.2e-54	GO:0005524, ATP binding;GO:0005886, plasma membrane;GO:0009611, response to wounding;GO:0009651, response to salt stress;GO:0009737, response to abscisic acid;GO:0009897, external side of plasma membrane;GO:0010222, stem vascular tissue pattern formation;GO:0010588, cotyledon vascular tissue pattern formation;GO:0015245, fatty acid transmembrane transporter activity;GO:0015908, fatty acid transpo…	-
TRINITY_DN78882_c0_g2	GTGGCGATCTTGTTGGCACGATCCATAGTCTCACGATCCTCACCAGTCTGGAAACGCCATTGAATGTATTCTGAAGGAGTCTTCTCCAAGTGGTGATCGATGTGTGCGAAAGCGTGTTGTTTGATGTAGGCGATACGGATGTTCTCGTGGGTGTAGACATCACCGGTGGTTGGGATAAGTTCACCGGTCAAGACGTTAATGAGAGTGGATTTGCCAGCACCATTGGGACCGATGACGGCAATACGGGAACCGAGCGAACACTGGAAGGAGATGTCGGAAATCTGGGGCTTTGGTGTACCTGGGTATTGGAAGCTCATCTTGGACACACGAACAATGGCCTTGGCCTTGGTCTTGACACCCTCGAGGAAACCTGGCTCAGGGAACTTGAATTCCATCTCA…	COG0488, Uup, ATPase components of ABC transporters with duplicated ATPase domains [General function prediction only]. 1.25946e-16	KOG0066, KOG0066, KOG0066, eIF2-interacting protein ABC50 (ABC superfamily) [Translation, ribosomal structure and biogenesis]. 1.8384e-20	gi|326498279|dbj|BAJ98567.1| predicted protein [Hordeum vulgare subsp. vulgare] 1.6e-70	gi|636763950|ref|XM_008085958.1| Glarea lozoyensis ATCC 20868 ARM repeat-containing protein mRNA 4.7239e-148	pfam00005, ABC_tran, ABC transporter. ABC transporters for a large family of proteins responsible for translocation of a variety of compounds across biological membranes. ABC transporters are the largest family of proteins in many completely sequenced bacteria. ABC transporters are composed of two copies of this domain and two copies of a transmembrane domain pfam00664. These four domains may bel…	sp|Q75EV6|EF3_ASHGO Elongation factor 3 OS=Ashbya gossypii (strain ATCC 10895 / CBS 109.51 / FGSC 9923 / NRRL Y-1056) GN=TEF3 PE=3 SV=2 1.23604e-84	tr|F2DTZ6|F2DTZ6_HORVD Predicted protein OS=Hordeum vulgare var. distichum PE=2 SV=1 1.2e-70	GO:0003746, translation elongation factor activity;GO:0005524, ATP binding;GO:0016887, ATPase activity	-
TRINITY_DN78862_c0_g1	GAAAATGATTTTTATACAAGGACCCATTACAAAATTACTTAGGACAGTAACATATAAATACACAAAATGTATTAACGCTGCAACACCACTCATTCCATCGAATCTCAACGTCGCCCGAGACGATGATGCTGGCTACTTCAACTCTCCCACTTTTCTCCCTCCCCAAAACCCCTAAAACCCATCATTCATATTCTCACCGCCACCTCATTCTTTCCCGCGGGCCCCACCAACCAATCGCACGACTCCCAAAGCTCCTATCTACTTCTTGTACAACCTTAACAAGAAGTTCAGTTTGTTTGGCTTACGTAAGTGGCCCAGCATCTGACCCAATCATTCTCTCCGATGATGAACTTGAATCAACTGACATAGTACAACAACCACCAACACCCACGCCTGCTA…	TIGR02204, system_ATPase_and_permease_component, ABC transporter, permease/ATP-binding protein. This protein is related to a Proteobacterial ATP transporter that exports lipid A and to eukaryotic P-glycoproteins. 4.10273e-50	KOG0058, KOG0058, KOG0058, Peptide exporter, ABC superfamily [Intracellular trafficking, secretion, and vesicular transport]. 8.65979e-46	gi|1021037129|gb|KZM94912.1| hypothetical protein DCAR_018154 [Daucus carota subsp. sativus] 4.5e-189	gi|731423560|ref|XM_002280230.3| PREDICTED: Vitis vinifera ABC transporter B family member 28 (LOC100262436), mRNA 0.0	pfam00005, ABC_tran, ABC transporter. ABC transporters for a large family of proteins responsible for translocation of a variety of compounds across biological membranes. ABC transporters are the largest family of proteins in many completely sequenced bacteria. ABC transporters are composed of two copies of this domain and two copies of a transmembrane domain pfam00664. These four domains may bel…	sp|Q8LPQ6|AB28B_ARATH ABC transporter B family member 28 OS=Arabidopsis thaliana GN=ABCB28 PE=2 SV=1 0.0	tr|A0A068U9V7|A0A068U9V7_COFCA Uncharacterized protein OS=Coffea canephora GN=GSCOC_T00020229001 PE=4 SV=1 1.4e-161	GO:0005215, transporter activity;GO:0005524, ATP binding;GO:0009507, chloroplast;GO:0009941, chloroplast envelope;GO:0016020, membrane;GO:0016021, integral component of membrane;GO:0042626, ATPase activity, coupled to transmembrane movement of substances;GO:0055085, transmembrane transport	K05657-ko02010 ABC transporters
TRINITY_DN77916_c0_g2	GGACACGATCTATTATCTCGAATACCGAACTGAGGGATTTTCGATGTTTGAATATGTAAGGGGCTAGACCAAATGGCTCTACAAGGGCAAAAGTTACAAAAGAGAATACCACATACTCTTTAAGAGCTGCTTGTAGATCAATGTAGCCATTTTTTACCGTAATAGCAGTATACCACAGTAGGAAAGCATTACAGGCAAAAAGAAGGAACTGTGAGAAGCCGAAGGCAAAACCAATTGTCATTCCATGTAGGATGTTTTGCCTAAAAATTTTCCTTAGCTGCAGTCCATAAAGTTCCAAAACCTTGTTTCCAGCACAAAATGCCACGACAGCATACATATTAGTAACAGCATCCTCAAGAACCAAAGATGCCTTTTTGTGCAGCTCTTGTATACCCCTTG…	pfam00664, ABC_membrane, ABC transporter transmembrane region. This family represents a unit of six transmembrane helices. Many members of the ABC transporter family (pfam00005) have two such regions. 1.22741e-20	KOG0055, KOG0055, KOG0055, Multidrug/pheromone exporter, ABC superfamily [Secondary metabolites biosynthesis, transport and catabolism]. 2.70355e-62	gi|1021047389|gb|KZN05169.1| hypothetical protein DCAR_006006 [Daucus carota subsp. sativus] 1.1e-167	gi|695011931|ref|XM_009394426.1| PREDICTED: Musa acuminata subsp. malaccensis ABC transporter B family member 20-like (LOC103978586), transcript variant X2, mRNA 3.29133e-118	pfam00664, ABC_membrane, ABC transporter transmembrane region. This family represents a unit of six transmembrane helices. Many members of the ABC transporter family (pfam00005) have two such regions. 2.9324e-21	sp|Q8LPT1|AB6B_ARATH ABC transporter B family member 6 OS=Arabidopsis thaliana GN=ABCB6 PE=1 SV=2 1.56182e-169	tr|A0A097P9R0|A0A097P9R0_HEVBR ABC transporter family protein OS=Hevea brasiliensis GN=ABCB20 PE=2 SV=1 7.3e-140	GO:0005524, ATP binding;GO:0005634, nucleus;GO:0005886, plasma membrane;GO:0009506, plasmodesma;GO:0016021, integral component of membrane;GO:0042626, ATPase activity, coupled to transmembrane movement of substances	-
TRINITY_DN77460_c1_g1	TAGTTTTCCCAGTACATTTTTTTAATGAAACGGCTCTTGGTAACTACAGAAATGTACTGGGAAAACTACCTAGTCAAAAAGTAAATGTAATTTCCCAACATAAAATTACTATATAACAAAGGCTCTTAATGTTGTTTAAGTAGAACAATCTTGGATTTTCTTGCAGAATAGAGAGTGTATGTCAAACATTCCGAGGATGAAAAAGCCCCTGAGATTGCTATGTGGGAGGCAATTGTATAGCAATTTATTTGACTTCATAAGTTTCCATATCTCAGTGGATGAAACATAACACATTTGTAAACAGTTACATGTCAAAGCTACCAATTGGAATAAACAAAGGTTTCCGATTCACATAAACTGTTCCAACACTCAATATATGGACTTCGATAACTTATCAAA…	COG4133, CcmA, ABC-type transport system involved in cytochrome c biogenesis, ATPase component [Posttranslational modification, protein turnover, chaperones]. 7.26941e-32	KOG0059, KOG0059, KOG0059, Lipid exporter ABCA1 and related proteins, ABC superfamily [Lipid transport and metabolism, General function prediction only]. 2.28003e-21	gi|1021040039|gb|KZM97820.1| hypothetical protein DCAR_014818 [Daucus carota subsp. sativus] 4.3e-106	gi|567923299|ref|XM_006453593.1| Citrus clementina hypothetical protein (CICLE_v10009382mg) mRNA, complete cds 1.61006e-153	pfam00005, ABC_tran, ABC transporter. ABC transporters for a large family of proteins responsible for translocation of a variety of compounds across biological membranes. ABC transporters are the largest family of proteins in many completely sequenced bacteria. ABC transporters are composed of two copies of this domain and two copies of a transmembrane domain pfam00664. These four domains may bel…	sp|Q9C8T1|AB1I_ARATH ABC transporter I family member 1 OS=Arabidopsis thaliana GN=ABCI1 PE=2 SV=1 1.90718e-126	tr|A0A068UPK8|A0A068UPK8_COFCA Uncharacterized protein OS=Coffea canephora GN=GSCOC_T00030858001 PE=4 SV=1 4.8e-105	GO:0005215, transporter activity;GO:0005524, ATP binding;GO:0006810, transport;GO:0015439, heme-transporting ATPase activity;GO:0016887, ATPase activity;GO:0017004, cytochrome complex assembly;GO:0030288, outer membrane-bounded periplasmic space;GO:0043190, ATP-binding cassette (ABC) transporter complex;GO:0103115, protoheme IX ABC transporter activity	-
TRINITY_DN77417_c3_g2	AGTCAGAGATACACTTGGTTTGATATTTCTAGTCCATATGTATTTGTCCGGGGAAGGCCTTTTCTGGTACTAATAATTACTTTAATAACAAACCAAATTCATCAAAATCTTGCATTTCCCATTTCACTTCATGGAGTCTTTTCAAGGTATGATCATCACTTACACTTACCATCATGCTATAATTTCTTTGTTAGCTATGTAAATTATGAACTTATATGACCAAGAAAAATAGAAAATACTGCTGTCTGATGTGTGTATCTCATTTATGTGTGTGTTTTTCTTATTTATGTGTGTGTGTGTGTGTGTGTGTTAAGAAGCAGCACAAGAACATCTATTGGCAGTTGATATAAATGATAAGGCATGTGAACATAGGACCAAGATTAAAGTAAGTGGGTTGAC…	COG1135, AbcC, ABC-type metal ion transport system, ATPase component [Inorganic ion transport and metabolism]. 7.27968e-12	KOG0055, KOG0055, KOG0055, Multidrug/pheromone exporter, ABC superfamily [Secondary metabolites biosynthesis, transport and catabolism]. 9.50922e-11	gi|1021033468|gb|KZM91252.1| hypothetical protein DCAR_021383 [Daucus carota subsp. sativus] 6.6e-32	-	pfam00005, ABC_tran, ABC transporter. ABC transporters for a large family of proteins responsible for translocation of a variety of compounds across biological membranes. ABC transporters are the largest family of proteins in many completely sequenced bacteria. ABC transporters are composed of two copies of this domain and two copies of a transmembrane domain pfam00664. These four domains may bel…	sp|Q0D9V6|STAR1_ORYSJ Protein STAR1 OS=Oryza sativa subsp. japonica GN=STAR1 PE=1 SV=1 6.74692e-22	tr|A0A059AIB9|A0A059AIB9_EUCGR Uncharacterized protein OS=Eucalyptus grandis GN=EUGRSUZ_J02855 PE=4 SV=1 2.7e-25	GO:0005460, UDP-glucose transmembrane transporter activity;GO:0005524, ATP binding;GO:0010044, response to aluminum ion;GO:0012506, vesicle membrane;GO:0015786, UDP-glucose transmembrane transport;GO:0016887, ATPase activity	-
TRINITY_DN77001_c0_g1	TCATCTAAAAGAAGAATGCTCTTTTTCTTAAGCAATGCTCTTCCAAGACAGAATAACTGTCTTTGCCCAACACTCCAGTTCTCCCCATTTTCAACAACTACAAAAGCATACGATAAAAAGTTCATTAGTAAAATGTGCATTTATACCATAAATGATATCGAAATGATGTATCTGACCTGTAGATTCCAGCTTCTCTTTGCTTTCTCGAACTATATCTCCCAACTGACATTTGTCTAGAGCCTCCCAAATTTCACCGTCAGAATATTGCTTCAGTAGGTCAAGGTTTCTTCTAACTGTCCCCTCGAACATTGTTGGGTCCTGAGGAATGATGCTAAGATTTGATCTCAAGTCATGAAGGCCTATCTTGGATATAACTACATCATCAATAATGATTCTTCC…	TIGR00957, Multidrug_resistance-associated_protein_1, multi drug resistance-associated protein (MRP). This model describes multi drug resistance-associated protein (MRP) in eukaryotes. The multidrug resistance-associated protein is an integral membrane protein that causes multidrug resistance when overexpressed in mammalian cells. It belongs to ABC transporter superfamily. The protein topology an…	KOG0054, KOG0054, KOG0054, Multidrug resistance-associated protein/mitoxantrone resistance protein, ABC superfamily [Secondary metabolites biosynthesis, transport and catabolism]. 1.78703e-36	gi|1021050326|gb|KZN08104.1| hypothetical protein DCAR_000773 [Daucus carota subsp. sativus] 1.2e-44	gi|590561118|ref|XM_007008659.1| Theobroma cacao Multidrug resistance protein ABC transporter family (TCM_042344) mRNA, complete cds 1.67757e-43	pfam00005, ABC_tran, ABC transporter. ABC transporters for a large family of proteins responsible for translocation of a variety of compounds across biological membranes. ABC transporters are the largest family of proteins in many completely sequenced bacteria. ABC transporters are composed of two copies of this domain and two copies of a transmembrane domain pfam00664. These four domains may bel…	sp|Q9M1C7|AB9C_ARATH ABC transporter C family member 9 OS=Arabidopsis thaliana GN=ABCC9 PE=2 SV=2 9.73803e-48	tr|A0A022RQN5|A0A022RQN5_ERYGU Uncharacterized protein (Fragment) OS=Erythranthe guttata GN=MIMGU_mgv1a019873mg PE=4 SV=1 2.6e-39	GO:0005524, ATP binding;GO:0008559, xenobiotic transmembrane transporting ATPase activity;GO:0016021, integral component of membrane;GO:0042626, ATPase activity, coupled to transmembrane movement of substances	-
TRINITY_DN76593_c2_g1	CACACACACACACACACACACACACACACGCACTACATCAAACTCTCTGCTTCACCCCTCCTCACTCTCTGTCTTCTCAAAGAAACATCATAATTTGTTCTGTTCTGTCTGAATGCTCATGAAACACTCACTCACTCACTTGTACTACTAAGTTAAGTCATTCCATTTTTCCATAGAGCTTGTTTATTTGTGATTACAATGGCGGAAGCAACGCTCCCCGAGGTAAAAACATTGCCGGAATCAGACAAGAAGAAGACGGAACAGAGCTTGCCTTTTTACCAGCTTTTCGCTTTTGCTGACAAGTTTGATTATCTTTTAATGATCATTGGTAGTCTCGGAGCTATTATTCATGGCTCTTCTATGCCTGTTTTCTTTCTCTTGTTCGGTCAAATGGTTAAT…	cd03249, ABC_MTABC3_MDL1_MDL2, ATP-binding cassette domain of a mitochondrial protein MTABC3 and related proteins. MTABC3 (also known as ABCB6) is a mitochondrial ATP-binding cassette protein involved in iron homeostasis and one of four ABC transporters expressed in the mitochondrial inner membrane, the other three being MDL1(ABC7), MDL2, and ATM1. In fact, the yeast MDL1 (multidrug resistance-li…	KOG0055, KOG0055, KOG0055, Multidrug/pheromone exporter, ABC superfamily [Secondary metabolites biosynthesis, transport and catabolism]. 0.0	gi|1021044606|gb|KZN02387.1| hypothetical protein DCAR_011141 [Daucus carota subsp. sativus] 0.0e+00	gi|590649823|ref|XM_007032435.1| Theobroma cacao ATP binding cassette subfamily B19 isoform 1 (TCM_018479) mRNA, complete cds 0.0	pfam00664, ABC_membrane, ABC transporter transmembrane region. This family represents a unit of six transmembrane helices. Many members of the ABC transporter family (pfam00005) have two such regions. 5.434e-28	sp|Q9LJX0|AB19B_ARATH ABC transporter B family member 19 OS=Arabidopsis thaliana GN=ABCB19 PE=1 SV=1 0.0	tr|F6H5R3|F6H5R3_VITVI Putative uncharacterized protein OS=Vitis vinifera GN=VIT_14s0108g00430 PE=4 SV=1 0.0e+00	GO:0005524, ATP binding;GO:0005886, plasma membrane;GO:0008361, regulation of cell size;GO:0009637, response to blue light;GO:0009639, response to red or far red light;GO:0009640, photomorphogenesis;GO:0009733, response to auxin;GO:0009734, auxin-activated signaling pathway;GO:0009926, auxin polar transport;GO:0009958, positive gravitropism;GO:0010160, formation of animal organ boundary;GO:001021…	K05658-ko04976 Bile secretion;ko02010 ABC transporters
TRINITY_DN75952_c0_g1	CCCTCATATACTCATATACTCCCTTCTCTTCTCCTCTCTCTTCACACTTCCATTTCCTCCTCTTCACTTCTTTCTACCCCCATCTATATATATTACCTCCATCCTGTCGAGTCTGTTTACGACGAGAACTATATCATCTATTTTAGGAGCTTGTTCACGAACTATATATATCGAGAACAAATATGGAAGAAACTCTTGGAGAACCACCCAAAACACCTCCAATGGATTCACATAACTTCCAATCTATAATGTCTTCATGCTATCCTATCACCCTCAAGTTCATAGACGTGTGTTACCGGGTGAAGCTACAAAACAAGGCCACAACAACCACCATCACAAAAATGTTCAATTCACCCGGTCCTACATCACCGGTTCAAACGAGTCAAGAACGAAGCATCT…	PLN03211, PLN03211, ABC transporter G-25; Provisional. 0.0	KOG0061, KOG0061, KOG0061, Transporter, ABC superfamily (Breast cancer resistance protein) [Secondary metabolites biosynthesis, transport and catabolism]. 3.96445e-96	gi|1021050743|gb|KZN08521.1| hypothetical protein DCAR_001051 [Daucus carota subsp. sativus] 0.0e+00	-	pfam00005, ABC_tran, ABC transporter. ABC transporters for a large family of proteins responsible for translocation of a variety of compounds across biological membranes. ABC transporters are the largest family of proteins in many completely sequenced bacteria. ABC transporters are composed of two copies of this domain and two copies of a transmembrane domain pfam00664. These four domains may bel…	sp|Q84TH5|AB25G_ARATH ABC transporter G family member 25 OS=Arabidopsis thaliana GN=ABCG25 PE=2 SV=1 0.0	tr|A0A0V0IN92|A0A0V0IN92_SOLCH Putative ABC transporter G family member 25-like OS=Solanum chacoense PE=3 SV=1 6.2e-259	GO:0005524, ATP binding;GO:0005886, plasma membrane;GO:0009737, response to abscisic acid;GO:0016021, integral component of membrane;GO:0016887, ATPase activity;GO:0042626, ATPase activity, coupled to transmembrane movement of substances;GO:0080168, abscisic acid transport	-
TRINITY_DN75351_c0_g1	GTTTTCATGGCCCTCGATTTCTCATCCAAACTTTTTCCTATTCATGTACATGAATAAACATGAGGCACTATTGTAGCACTGCCACAAACCGGCAAACAAAAGTACTGCTTCGACCACGGAAACAGCCCTTTTTTCTTTCTAAATGCAGAATACAAATCTCACATAAATATATGTCACTATAGTCAGAGAACAACTAAATGCCTAACCATATTGCTAATCAAAAATTAAATGTTTATGTTGAGGTCATCTGAAGTGCAACAAGTGACGCATAGACTCCATTAGGAATGGTCAGAAGAGAATTATGATTTCCTTTCTCAGCAATGACACCATTCTTCACAACAGCTATTATATCCGCCCCTTTAATTGTAACTAATCGATGTGCCACTACAACAGCCGTTC…	cd03249, ABC_MTABC3_MDL1_MDL2, ATP-binding cassette domain of a mitochondrial protein MTABC3 and related proteins. MTABC3 (also known as ABCB6) is a mitochondrial ATP-binding cassette protein involved in iron homeostasis and one of four ABC transporters expressed in the mitochondrial inner membrane, the other three being MDL1(ABC7), MDL2, and ATM1. In fact, the yeast MDL1 (multidrug resistance-li…	KOG0055, KOG0055, KOG0055, Multidrug/pheromone exporter, ABC superfamily [Secondary metabolites biosynthesis, transport and catabolism]. 1.51469e-81	gi|1021026831|gb|KZM84618.1| hypothetical protein DCAR_027960 [Daucus carota subsp. sativus] 4.3e-96	gi|1009139666|ref|XM_016031753.1| PREDICTED: Ziziphus jujuba ABC transporter B family member 9-like (LOC107422318), mRNA 3.92898e-99	pfam00005, ABC_tran, ABC transporter. ABC transporters for a large family of proteins responsible for translocation of a variety of compounds across biological membranes. ABC transporters are the largest family of proteins in many completely sequenced bacteria. ABC transporters are composed of two copies of this domain and two copies of a transmembrane domain pfam00664. These four domains may bel…	sp|Q9FWX7|AB11B_ARATH ABC transporter B family member 11 OS=Arabidopsis thaliana GN=ABCB11 PE=2 SV=1 5.5898e-96	tr|A0A068VG70|A0A068VG70_COFCA Uncharacterized protein OS=Coffea canephora GN=GSCOC_T00008934001 PE=4 SV=1 2.3e-89	GO:0005524, ATP binding;GO:0005886, plasma membrane;GO:0009506, plasmodesma;GO:0010329, auxin efflux transmembrane transporter activity;GO:0010540, basipetal auxin transport;GO:0016021, integral component of membrane;GO:0042626, ATPase activity, coupled to transmembrane movement of substances	-
TRINITY_DN74957_c0_g4	TATAACTCCATTCCTCCTCGCTTCATCAGGAAAAGCTCATCAAAAGCTTCAAATATGTCGATACTTGGCTGATGAATGGTGCAAACAACTGTTCTTCCAGTGTCTACAGTATTTCTCACTGTTCTCATCACAATTGCAGCAGCTCTTGCATCCAGCCCTGAAGTTGGCTCATCCATGAATACTATTGAGGGGTTTGATACCAATTCAACTGCAATGGTTAACCTCTTGCGCTGCTCAGTTGAAAGACCATTTACACCTGGCAACCCTACCAGTGCTTCCTTTAAGTTGTCTAGTTCAACAAGTTCCAGGACCTCATTGACAAACATCTTTCTTTTGGCAGTATCAACTTCTGAAGGCAACCGCAGCCAGGCTGAGTAAATTAGTGACTCGTAGACAGTA…	PLN03140, PLN03140, ABC transporter G family member; Provisional. 8.45233e-113	KOG0065, KOG0065, KOG0065, Pleiotropic drug resistance proteins (PDR1-15), ABC superfamily [Secondary metabolites biosynthesis, transport and catabolism]. 5.38022e-88	gi|1021031436|gb|KZM89221.1| hypothetical protein DCAR_026296 [Daucus carota subsp. sativus] 4.1e-104	gi|530354315|gb|KC013237.1| Panax ginseng pleiotropic drug resistance transporter 2 (PDR2) mRNA, complete cds 0.0	pfam00005, ABC_tran, ABC transporter. ABC transporters for a large family of proteins responsible for translocation of a variety of compounds across biological membranes. ABC transporters are the largest family of proteins in many completely sequenced bacteria. ABC transporters are composed of two copies of this domain and two copies of a transmembrane domain pfam00664. These four domains may bel…	sp|Q8GU88|AB39G_ORYSJ ABC transporter G family member 39 OS=Oryza sativa subsp. japonica GN=ABCG39 PE=3 SV=1 1.64297e-120	tr|A0A096VPN4|A0A096VPN4_PANGI Pleiotropic drug resistance transporter 2 OS=Panax ginseng GN=PDR2 PE=2 SV=1 5.5e-101	GO:0005524, ATP binding;GO:0005886, plasma membrane;GO:0006810, transport;GO:0016021, integral component of membrane;GO:0016887, ATPase activity;GO:0042626, ATPase activity, coupled to transmembrane movement of substances	-
TRINITY_DN74788_c0_g4	TTTATTGATTACTAAATTATTACTGCACAACATAAATAACAGGCACACAGACAGTCCTTTGTTTGTTGTTTCCATGAGCTAAGGTAAGATAAGAGAAATAGATACATATATACACACAGCTCTTGTATCTATATTTATCTATCAACCATGGATTTAGCCACTAAGCTTCAACTTATCGACCTTAGTTCATCATTTCTCACCGGCACATCACTTTCCGATGCTCGGAAACCATCTTTCCGGCAACGATTCCGGCCAATTTCAACGCAAATACCGGCCAATTCAACCATGCCCACCAACTGTTCGATGAAATGCGTAGCTGGGTTCAACACTAGAAACTCAAATTACACTAAAAACCCACCTAGATTATCAGCTGTAGCTGTTGATACAGCTGAACCAAGT…	COG0488, Uup, ATPase components of ABC transporters with duplicated ATPase domains [General function prediction only]. 8.19737e-36	KOG0927, KOG0927, KOG0927, Predicted transporter (ABC superfamily) [General function prediction only]. 9.09906e-51	gi|1021050939|gb|KZN08717.1| hypothetical protein DCAR_001373 [Daucus carota subsp. sativus] 8.8e-198	gi|764514976|ref|XM_004288048.2| PREDICTED: Fragaria vesca subsp. vesca ABC transporter F family member 5-like (LOC101314214), mRNA 0.0	pfam12848, ABC_tran_Xtn, ABC transporter. This domain is an extension of some members of pfam00005 and other ABC-transporter families. 3.23229e-11	sp|Q9LV93|AB5F_ARATH ABC transporter F family member 5 OS=Arabidopsis thaliana GN=ABCF5 PE=2 SV=1 0.0	tr|A0A118JUK2|A0A118JUK2_CYNCS AAA+ ATPase domain-containing protein (Fragment) OS=Cynara cardunculus var. scolymus GN=Ccrd_005777 PE=4 SV=1 1.9e-168	GO:0005215, transporter activity;GO:0005524, ATP binding;GO:0009624, response to nematode;GO:0016887, ATPase activity	-
TRINITY_DN74542_c1_g3	GGGAAACAGGAGTTGTCAGTTTGAAAGTCTTGGCAAGGTATAAAAATGCATTAGGAGGGTTGTGGGTAGTTATGATACTCTTCATGTGTTATGTCTCAACAGAAGTTTTACGAGTTCTCAGCAGCACATGGTTGAGTATTTGGACAGATGAAAGTACCCCGAAGAACCATGGGCCAGGTTTCTACAATCTTATATATTCACTTCTATCATTTTGTCAGGTATGTACAAGTAGCTTATTAATAGCTTACCTTCCATCAAGTGAATTAGTTTCATTTTTCTTTTAATATTACTCATTTGCCACCTCATACTGTATATTGCAGTTAACAATTTTATCCCTTACATAAAGCATAAATCTCATATCTTGTTAACAATCTGCTAGGTTCTGGTGACTTTGGCAAA…	PLN03130, PLN03130, ABC transporter C family member; Provisional. 0.0	KOG0054, KOG0054, KOG0054, Multidrug resistance-associated protein/mitoxantrone resistance protein, ABC superfamily [Secondary metabolites biosynthesis, transport and catabolism]. 3.14833e-161	gi|1021049239|gb|KZN07019.1| hypothetical protein DCAR_007856 [Daucus carota subsp. sativus] 0.0e+00	gi|731405247|ref|XM_010657404.1| PREDICTED: Vitis vinifera ABC transporter C family-like (LOC100251535), transcript variant X2, mRNA 0.0	pfam00005, ABC_tran, ABC transporter. ABC transporters for a large family of proteins responsible for translocation of a variety of compounds across biological membranes. ABC transporters are the largest family of proteins in many completely sequenced bacteria. ABC transporters are composed of two copies of this domain and two copies of a transmembrane domain pfam00664. These four domains may bel…	sp|Q42093|AB2C_ARATH ABC transporter C family member 2 OS=Arabidopsis thaliana GN=ABCC2 PE=1 SV=2 0.0	tr|A0A068UBT1|A0A068UBT1_COFCA Uncharacterized protein OS=Coffea canephora GN=GSCOC_T00020809001 PE=4 SV=1 8.8e-293	GO:0000325, plant-type vacuole;GO:0005524, ATP binding;GO:0005773, vacuole;GO:0005774, vacuolar membrane;GO:0008559, xenobiotic transmembrane transporting ATPase activity;GO:0016021, integral component of membrane;GO:0042626, ATPase activity, coupled to transmembrane movement of substances;GO:1902417, (+)-abscisic acid D-glucopyranosyl ester transmembrane transporter activity;GO:1902418, (+)-absc…	-
TRINITY_DN74384_c1_g2	TTCTGGAATCTTTAGTTTGGGTGTGTCTGACGTACTATGTCATTGGGTACAGCCCAGAGCCGGAGAGGTTTTTCCGACAGTTACTTCTATTCTTCTTTGTACACTGGACATCAATATCTATGTTCCGGTTCTTGGCATCTGTTTGTAGGACTGCAGGTGCTAGCACAACAGCTGGTAGTGTGTCATTACTACTTGTATTATTATTTGGGGGCTTCATCGTCCCAGGACCCTTAATGCCATCTTGGTTGAAGTGGGGATTTTGGGTTTCCCCAATAACATATGGTCAGATAGGCCTTGCTGTGAATGAGTTTCTTTCTCCAAGATGGCAAAAGTTTTATAATGTAGATGTTGTCCATGAACACAACAATAGGGCATCAAGCTCTCATTGATCGCGGACTG…	PLN03140, PLN03140, ABC transporter G family member; Provisional. 2.70214e-109	KOG0065, KOG0065, KOG0065, Pleiotropic drug resistance proteins (PDR1-15), ABC superfamily [Secondary metabolites biosynthesis, transport and catabolism]. 4.48669e-88	gi|1021044585|gb|KZN02366.1| hypothetical protein DCAR_011120 [Daucus carota subsp. sativus] 5.9e-137	gi|567871406|ref|XM_006428230.1| Citrus clementina hypothetical protein (CICLE_v10013618mg) mRNA, complete cds 4.20031e-148	pfam00005, ABC_tran, ABC transporter. ABC transporters for a large family of proteins responsible for translocation of a variety of compounds across biological membranes. ABC transporters are the largest family of proteins in many completely sequenced bacteria. ABC transporters are composed of two copies of this domain and two copies of a transmembrane domain pfam00664. These four domains may bel…	sp|Q5W274|PDR3_TOBAC Pleiotropic drug resistance protein 3 OS=Nicotiana tabacum GN=PDR3 PE=2 SV=1 4.49326e-162	tr|M1BJZ2|M1BJZ2_SOLTU Uncharacterized protein OS=Solanum tuberosum GN=PGSC0003DMG400018249 PE=3 SV=1 1.3e-125	GO:0005524, ATP binding;GO:0006810, transport;GO:0016021, integral component of membrane;GO:0016887, ATPase activity	-
TRINITY_DN74096_c1_g1	TTCTAATGCTGACAATATTGATAAGATGACTCAAGAAGTGCTCAAGTATGCATTTTACTTTCTTGTAGTTGGAGCTGCAATTTGGGCTTCTTCATGGGCAGAGATATCTTGTTGGATGTGGACTGGAGAAAGACAAACAACTAAAATGAGGATTGAGTACTTAGAATCAGCTTTGAATCAAGATGTTCAATTTTTCGATACTGAAGTTAGGACTTCAGATGTTGTGTTTGGGATTAACACTGATGCTGTCATGGTCCAAGATGCTATTAGTGAAAAGTTGGGAAATTTCATTCACTACATGGCAACTTTTGTTTCTGGATTTGTGGTGGGATTTACTGCTGTGTGGCAATTAGCTTTGGTCACACTTGCTGTTGTTCCTCTTATAGCTGTGATTGGAGC…	cd03249, ABC_MTABC3_MDL1_MDL2, ATP-binding cassette domain of a mitochondrial protein MTABC3 and related proteins. MTABC3 (also known as ABCB6) is a mitochondrial ATP-binding cassette protein involved in iron homeostasis and one of four ABC transporters expressed in the mitochondrial inner membrane, the other three being MDL1(ABC7), MDL2, and ATM1. In fact, the yeast MDL1 (multidrug resistance-li…	KOG0055, KOG0055, KOG0055, Multidrug/pheromone exporter, ABC superfamily [Secondary metabolites biosynthesis, transport and catabolism]. 1.39187e-124	gi|1021034037|gb|KZM91821.1| hypothetical protein DCAR_020814 [Daucus carota subsp. sativus] 4.1e-210	gi|590630928|ref|XM_007027357.1| Theobroma cacao ATP binding cassette subfamily B1 isoform 1 (TCM_022244) mRNA, complete cds 0.0	pfam00664, ABC_membrane, ABC transporter transmembrane region. This family represents a unit of six transmembrane helices. Many members of the ABC transporter family (pfam00005) have two such regions. 1.91713e-29	sp|Q9ZR72|AB1B_ARATH ABC transporter B family member 1 OS=Arabidopsis thaliana GN=ABCB1 PE=1 SV=1 0.0	tr|F6HKB3|F6HKB3_VITVI Putative uncharacterized protein OS=Vitis vinifera GN=VIT_08s0007g05060 PE=4 SV=1 2.7e-190	GO:0005524, ATP binding;GO:0005886, plasma membrane;GO:0008361, regulation of cell size;GO:0009506, plasmodesma;GO:0009624, response to nematode;GO:0009637, response to blue light;GO:0009639, response to red or far red light;GO:0009640, photomorphogenesis;GO:0009733, response to auxin;GO:0009734, auxin-activated signaling pathway;GO:0009926, auxin polar transport;GO:0009958, positive gravitropism…	K05658-ko04976 Bile secretion;ko02010 ABC transporters
TRINITY_DN74057_c1_g1	GTTGAAGCGCAGCCACTCGTTGGCCGCGCAGGTGACGTCCACCCCGGCCACGGCCGTGGACAGCATGGCCGACACGAGATAGGTGAAGGGCGAGAGGCGGTACATGAAGATCCAGAAGCGGGGGAAGGTCTCGGGCGTGGCGAGGACGCCGCAGAAGATGAGGCACAGCGTGAACAGCAGGTTGGCGAAGTTCCCTCCCGCTTCGGCAGTTTCGAAACCGGCGATGATGAAGTCCGTGAAGGTGCTCGTGAACAGCAGGAAGGCGACGAGCAGCAGGAACATGAGCCCCCCGCGCTCCGTGGTCGCCCCGGCCTCGGCGGCGTTGCGGTAGAGTCCGACGGGGTAGTACCAGCAGAAGAACATGAGCGCGGCCATGAGCGTGTTCCAAGGGAGTTCGAC…	TIGR00956, Multidrug_resistance_protein, Pleiotropic Drug Resistance (PDR) Family protein. [Transport and binding proteins, Other]. 0.0	KOG0065, KOG0065, KOG0065, Pleiotropic drug resistance proteins (PDR1-15), ABC superfamily [Secondary metabolites biosynthesis, transport and catabolism]. 9.67418e-149	gi|728818390|gb|KHG02781.1| ABC transporter G family member 29 [Gossypium arboreum] 1.0e-75	gi|367040870|ref|XM_003650768.1| Thielavia terrestris NRRL 8126 hypothetical protein (THITE_2110651) mRNA, complete cds 0.0	pfam00005, ABC_tran, ABC transporter. ABC transporters for a large family of proteins responsible for translocation of a variety of compounds across biological membranes. ABC transporters are the largest family of proteins in many completely sequenced bacteria. ABC transporters are composed of two copies of this domain and two copies of a transmembrane domain pfam00664. These four domains may bel…	sp|O74208|PDH1_CANGA ATP-binding cassette transporter CGR1 OS=Candida glabrata (strain ATCC 2001 / CBS 138 / JCM 3761 / NBRC 0622 / NRRL Y-65) GN=PDH1 PE=3 SV=3 0.0	tr|A0A0B0MV44|A0A0B0MV44_GOSAR ABC transporter G family member 29 OS=Gossypium arboreum GN=F383_25090 PE=3 SV=1 8.0e-76	GO:0005524, ATP binding;GO:0005886, plasma membrane;GO:0008559, xenobiotic transmembrane transporting ATPase activity;GO:0015238, drug transmembrane transporter activity;GO:0016021, integral component of membrane;GO:0016887, ATPase activity;GO:0042493, response to drug;GO:0046618, drug export	-
TRINITY_DN73806_c1_g1	GCTGGTCTGGCCAAGGGTCTAGGACTTGGCACCTTGCACTGTGTACTTTTTCTTTCGTGGTCGATGCTGGTTTGGTTTACTAGCATTGTTGTTCACAAGCATATTGCTAATGGTGGAGATTCTTTCACAACTATGTGCAATGTTGTTATTGCAAGCTTGTCACTTGGACAATCAGCACCAGATATTACTGCATTTCTCCGAGCAAAAAGTGCTGCCTATCCCATCTTTAAAATGATAGAGAGGAATACTGTCAACAAAATCAGTACAAAAAAAGGTGGGAAGTTGCAGAAAGTGGAGGGGCACATCCAATTCAAGGACGTGTACTTCAGTTACCCATCCCGCCCTGATGTGGTAATCACCAATAAGCTCTGCCTTGATATTCCTCCTGGAAAAGTGATA…	cd03249, ABC_MTABC3_MDL1_MDL2, ATP-binding cassette domain of a mitochondrial protein MTABC3 and related proteins. MTABC3 (also known as ABCB6) is a mitochondrial ATP-binding cassette protein involved in iron homeostasis and one of four ABC transporters expressed in the mitochondrial inner membrane, the other three being MDL1(ABC7), MDL2, and ATM1. In fact, the yeast MDL1 (multidrug resistance-li…	KOG0055, KOG0055, KOG0055, Multidrug/pheromone exporter, ABC superfamily [Secondary metabolites biosynthesis, transport and catabolism]. 0.0	gi|1021053853|gb|KZN11631.1| hypothetical protein DCAR_004287 [Daucus carota subsp. sativus] 0.0e+00	gi|703100587|ref|XM_010098657.1| Morus notabilis ABC transporter B family member 2 partial mRNA 3.62776e-178	pfam00664, ABC_membrane, ABC transporter transmembrane region. This family represents a unit of six transmembrane helices. Many members of the ABC transporter family (pfam00005) have two such regions. 1.52171e-22	sp|Q8LPK2|AB2B_ARATH ABC transporter B family member 2 OS=Arabidopsis thaliana GN=ABCB2 PE=1 SV=3 0.0	tr|D7TTU5|D7TTU5_VITVI Putative uncharacterized protein OS=Vitis vinifera GN=VIT_02s0012g01660 PE=4 SV=1 0.0e+00	GO:0005524, ATP binding;GO:0016020, membrane;GO:0016021, integral component of membrane;GO:0042626, ATPase activity, coupled to transmembrane movement of substances;GO:0055085, transmembrane transport	K05658-ko04976 Bile secretion;ko02010 ABC transporters
TRINITY_DN73428_c0_g4	CACTGTTAAATTGATGGAGAAGTACCAAGCTAAAATTTTTCGTTGGGAACTTATGTCAAACACCTTGAGGTACTTGAAATTGAAGGCTCAGAATGTTGAGGTACTTGAAATATTGTGCTTGTTCTTTACTGATTGAAGATACCTGATTGCCTAGCATACATGTCATCGTGCTTTTTCTGTCTCATATTTGCGTTGTCATGGAGGCTTACGTTGGCTGCTATTCCATTCTCTTTAATGTTCATTATCCCTGGGCTTGGATTTGGTAAACTCATGATGGATGTGGCAATGAAGTCGATTGAATCTTATGGGGTTGCTGGTGGAATTGCAGAACAAGCAATTTCTTCTATAAGAATTGTCTATTCCTATGTTGGCGAGAACCAGACGCTAGAAAGATTTAGC…	cd03249, ABC_MTABC3_MDL1_MDL2, ATP-binding cassette domain of a mitochondrial protein MTABC3 and related proteins. MTABC3 (also known as ABCB6) is a mitochondrial ATP-binding cassette protein involved in iron homeostasis and one of four ABC transporters expressed in the mitochondrial inner membrane, the other three being MDL1(ABC7), MDL2, and ATM1. In fact, the yeast MDL1 (multidrug resistance-li…	KOG0055, KOG0055, KOG0055, Multidrug/pheromone exporter, ABC superfamily [Secondary metabolites biosynthesis, transport and catabolism]. 2.74217e-32	gi|1021032327|gb|KZM90111.1| hypothetical protein DCAR_022524 [Daucus carota subsp. sativus] 1.0e-109	gi|747099721|ref|XM_011099619.1| PREDICTED: Sesamum indicum putative multidrug resistance protein (LOC105176721), mRNA 5.84215e-98	pfam00664, ABC_membrane, ABC transporter transmembrane region. This family represents a unit of six transmembrane helices. Many members of the ABC transporter family (pfam00005) have two such regions. 3.93867e-14	sp|Q6YUU5|MDR_ORYSJ Putative multidrug resistance protein OS=Oryza sativa subsp. japonica GN=Os02g0190300 PE=3 SV=1 1.15031e-42	tr|K4CH95|K4CH95_SOLLC Uncharacterized protein OS=Solanum lycopersicum PE=4 SV=1 3.0e-85	GO:0005524, ATP binding;GO:0016021, integral component of membrane;GO:0042626, ATPase activity, coupled to transmembrane movement of substances;GO:0055085, transmembrane transport	-
TRINITY_DN72215_c0_g3	CAAACAATGGAGAGCCCTCCGAGAGTCTTAAGTTTCAACGGCTTGCTTGTGCGGACCTCTCTGAACGATTAAAAAAGAAGAAAATGAAGGCCCTTATACCTCAGATAGTACAACTAATATACTTTGGGGTGTTATTTATATTTTGCTTCGGCTCTTTGGCAGTTTCGGGGGGATCTTTTGATTGCTCTCGCCTAGTTGCTTTTATGACATCCTTGGTTCTCTTGATTAAGCCAATACAGGATGTGGGTAAAGCATATAATGAGTTAAAGCAAGGAGAACCGGCTATTGAACGTTTGTTTGACTTGTCAAGGTTCAGATCTCAGATGATTGAGAAATCAGATGCAGTAGATTTAGAGTCTGTGAGAGGAGATATAACATTTCATGATGTTTGTTTCGGAT…	COG1132, MdlB, ABC-type multidrug transport system, ATPase and permease components [Defense mechanisms]. 6.66883e-45	KOG0058, KOG0058, KOG0058, Peptide exporter, ABC superfamily [Intracellular trafficking, secretion, and vesicular transport]. 4.5769e-38	gi|802600495|ref|XP_012072978.1| PREDICTED: ABC transporter B family member 29, chloroplastic [Jatropha curcas] 1.1e-106	gi|764608316|ref|XM_011468981.1| PREDICTED: Fragaria vesca subsp. vesca ABC transporter B family member 29, chloroplastic (LOC101301989), transcript variant X2, mRNA 2.90034e-67	pfam00005, ABC_tran, ABC transporter. ABC transporters for a large family of proteins responsible for translocation of a variety of compounds across biological membranes. ABC transporters are the largest family of proteins in many completely sequenced bacteria. ABC transporters are composed of two copies of this domain and two copies of a transmembrane domain pfam00664. These four domains may bel…	sp|Q9LZB8|AB29B_ARATH ABC transporter B family member 29, chloroplastic OS=Arabidopsis thaliana GN=ABCB29 PE=2 SV=1 6.14851e-110	tr|A0A067KQQ6|A0A067KQQ6_JATCU Uncharacterized protein OS=Jatropha curcas GN=JCGZ_06762 PE=4 SV=1 8.2e-107	GO:0005215, transporter activity;GO:0005524, ATP binding;GO:0009507, chloroplast;GO:0009941, chloroplast envelope;GO:0016021, integral component of membrane;GO:0031969, chloroplast membrane;GO:0042626, ATPase activity, coupled to transmembrane movement of substances;GO:0055085, transmembrane transport	-
TRINITY_DN71702_c0_g1	AATTTGGTTTGTGGTACAACTACATTTGTATAAGATTACATTACAAGGTAATGAACGGTATATAATTAGACACCAGTGAAATGGTTCCGCAGACGCTGCCTTGTAACCAATTCCATTCTGTGCTATGCTACATGCTCGTTTGTAGTAAAAACAAAAGTGCCAAAAATTTTCCTGCATCATGTTGCAGAAACTGCTTTGTACCCTTCTTTCTCAAGAAGCTTCGCTATAGATATATCTCCTGTCTTGATGATCTTTCCATCCTCCTAAAAACACAACAAGATTGTCAATAAGTAAACACACAATTACAACCAAAAAGACCTGAATTATGTCTCCATTCAAACAAACAATGCAATTCCGACTTGCTTGTAAAGGCAAAAAAGACAATTAAACAAGTTAGTT…	CHL00131, ycf16, sulfate ABC transporter protein; Validated. 6.28894e-59	KOG0057, KOG0057, KOG0057, Mitochondrial Fe/S cluster exporter, ABC superfamily [Intracellular trafficking, secretion, and vesicular transport]. 7.21346e-06	gi|1021037023|gb|KZM94806.1| hypothetical protein DCAR_018048 [Daucus carota subsp. sativus] 3.7e-109	gi|1000956376|ref|XM_002523591.2| PREDICTED: Ricinus communis ABC transporter I family member 6, chloroplastic (LOC8289484), mRNA 2.01894e-109	pfam00005, ABC_tran, ABC transporter. ABC transporters for a large family of proteins responsible for translocation of a variety of compounds across biological membranes. ABC transporters are the largest family of proteins in many completely sequenced bacteria. ABC transporters are composed of two copies of this domain and two copies of a transmembrane domain pfam00664. These four domains may bel…	sp|Q9CAF5|AB6I_ARATH ABC transporter I family member 6, chloroplastic OS=Arabidopsis thaliana GN=ABCI6 PE=1 SV=1 1.52349e-87	tr|B9HKI2|B9HKI2_POPTR ABC transporter family protein OS=Populus trichocarpa GN=POPTR_0008s01320g PE=4 SV=1 2.8e-80	GO:0005215, transporter activity;GO:0005524, ATP binding;GO:0009507, chloroplast;GO:0009570, chloroplast stroma;GO:0009793, embryo development ending in seed dormancy;GO:0010027, thylakoid membrane organization;GO:0042626, ATPase activity, coupled to transmembrane movement of substances	-
TRINITY_DN71330_c1_g2	GCCCTTCTTCTTTCTCTTGAACAGCCTCCCGAAGGTGACATTTCTCAAGAACCTCCCAAATTTCGATATCAGTATGCTCTGATAAGGGGTCAATGTTAAATCTCACAGAACCACTGAACAGTGTTGGATCTTGTGGAATGATGCCAAGCTGTGATCTGAGGTCATGAAGCCCGATTGTGGAGATATCTATGTCATCTATTACAATCGTTCCTTCTGTAGGTTCAACCAGGCGAAATAATGCACTTATCAGAGTTGTTTTCCCACTACCAGTCCTTCCAACTATTCCAATACTATGCCCACCTTTAAAAACGCAACTAATTCCACGCAGAACTAAAGGGGCATTTCGCTGGTATTTGACCTGCTTAATTAAGACTTTTCATTATATAGTAGTGTTTTAAC…	TIGR00957, Multidrug_resistance-associated_protein_1, multi drug resistance-associated protein (MRP). This model describes multi drug resistance-associated protein (MRP) in eukaryotes. The multidrug resistance-associated protein is an integral membrane protein that causes multidrug resistance when overexpressed in mammalian cells. It belongs to ABC transporter superfamily. The protein topology an…	KOG0054, KOG0054, KOG0054, Multidrug resistance-associated protein/mitoxantrone resistance protein, ABC superfamily [Secondary metabolites biosynthesis, transport and catabolism]. 2.63852e-54	gi|1021049916|gb|KZN07696.1| hypothetical protein DCAR_008533 [Daucus carota subsp. sativus] 3.4e-78	gi|743825562|ref|XM_011024264.1| PREDICTED: Populus euphratica ABC transporter C family member 10-like (LOC105124302), transcript variant X3, mRNA 4.60903e-48	pfam00005, ABC_tran, ABC transporter. ABC transporters for a large family of proteins responsible for translocation of a variety of compounds across biological membranes. ABC transporters are the largest family of proteins in many completely sequenced bacteria. ABC transporters are composed of two copies of this domain and two copies of a transmembrane domain pfam00664. These four domains may bel…	sp|Q9LYS2|AB10C_ARATH ABC transporter C family member 10 OS=Arabidopsis thaliana GN=ABCC10 PE=2 SV=2 9.76577e-73	tr|A0A061G6V3|A0A061G6V3_THECC Multidrug resistance-associated protein 14, putative OS=Theobroma cacao GN=TCM_016389 PE=4 SV=1 1.7e-69	GO:0005524, ATP binding;GO:0005774, vacuolar membrane;GO:0008559, xenobiotic transmembrane transporting ATPase activity;GO:0016021, integral component of membrane;GO:0042626, ATPase activity, coupled to transmembrane movement of substances	-
TRINITY_DN70911_c1_g3	TGCAACTTGCTTGGATTCAATCTATATTTAGGACGTGGTTATCGGATTGAGCTGCTGTGACTTGATTTGATCTTCCAAGTTCTTCATCCTTGCTACGATTCAGGAAAAGATACTATCTCATTGTTCGTGTGATGATTCTTGGCTCAGCAGCACAGCAAACCTGCTCGTCTCCTCTTCTACCAATGCACGTGGCTCACCAATTTCGACAACACGGCCAGCTTCGACCACTGCAACGCGATCAAAGTCCATCAATGTATGAATCCTGTGAGCCACCATTATAATGGTGCAATGACCGAACTCGGTGCGAATCAGTCTCTGGATCTGCTCGTCCGTTTGTACGTCAAGACTGCTCGTAGGCTCATCGAGGAGCAGAACTTTACTCTTTTTGATGAGCACCCT…	TIGR00957, Multidrug_resistance-associated_protein_1, multi drug resistance-associated protein (MRP). This model describes multi drug resistance-associated protein (MRP) in eukaryotes. The multidrug resistance-associated protein is an integral membrane protein that causes multidrug resistance when overexpressed in mammalian cells. It belongs to ABC transporter superfamily. The protein topology an…	KOG0054, KOG0054, KOG0054, Multidrug resistance-associated protein/mitoxantrone resistance protein, ABC superfamily [Secondary metabolites biosynthesis, transport and catabolism]. 1.26115e-89	gi|971510938|dbj|GAQ87274.1| ABC transporter [Klebsormidium flaccidum] 7.8e-68	-	pfam00005, ABC_tran, ABC transporter. ABC transporters for a large family of proteins responsible for translocation of a variety of compounds across biological membranes. ABC transporters are the largest family of proteins in many completely sequenced bacteria. ABC transporters are composed of two copies of this domain and two copies of a transmembrane domain pfam00664. These four domains may bel…	sp|Q5F364|MRP1_CHICK Multidrug resistance-associated protein 1 OS=Gallus gallus GN=ABCC1 PE=2 SV=1 1.31115e-86	tr|A0A0D6QX25|A0A0D6QX25_ARACU Uncharacterized protein OS=Araucaria cunninghamii PE=4 SV=1 2.3e-64	GO:0005524, ATP binding;GO:0005886, plasma membrane;GO:0016021, integral component of membrane;GO:0042626, ATPase activity, coupled to transmembrane movement of substances	K05670-ko02010 ABC transporters
TRINITY_DN70725_c1_g2	TGAAACTGTGCAATACGCAGGTGGTTGTGCCGCCTAACCATGCCATCAAGGGGAACCAAGTCCCCTGTCATCAGCTTCAGCAACGTACTCTTCCCAGCACCATTGGGTCCAACCAATGCCACTCTCGAATCAAGGTCTACCCCAAAGTCAAGGTTCTTGTATATTAGGTTATCAGGAGTATAACCAAATGTAACTTCCACAAACTGTAGTACAGGTGGAGGAAGCTTGCCAACATCAACAAATCGGAAAACCAAAACCTTGTCCCTGGCCACCTTCTCTGTTAGCCCACCACGCTCCATTTTTGCCAGAGTTTTCTCTTTGCTCTGTGCCTGACGAGCTAGTTTAGCTGAGCCGTGCCCAAATCTAGCAATATACTCTTTCATTGAAGCGATCTGCTCC…	PLN03073, PLN03073, ABC transporter F family; Provisional. 1.88842e-99	KOG0927, KOG0927, KOG0927, Predicted transporter (ABC superfamily) [General function prediction only]. 2.74412e-168	gi|661889467|emb|CDP07054.1| unnamed protein product [Coffea canephora] 1.2e-197	gi|971550307|ref|XM_006347137.2| PREDICTED: Solanum tuberosum ABC transporter F family member 1-like (LOC102590308), mRNA 0.0	pfam12848, ABC_tran_Xtn, ABC transporter. This domain is an extension of some members of pfam00005 and other ABC-transporter families. 3.19959e-09	sp|Q9FJH6|AB1F_ARATH ABC transporter F family member 1 OS=Arabidopsis thaliana GN=ABCF1 PE=1 SV=1 0.0	tr|A0A068UFT4|A0A068UFT4_COFCA Uncharacterized protein OS=Coffea canephora GN=GSCOC_T00024152001 PE=4 SV=1 9.0e-198	GO:0005215, transporter activity;GO:0005524, ATP binding;GO:0005886, plasma membrane;GO:0016887, ATPase activity	-
TRINITY_DN70652_c0_g1	TATGGCGCCAAAACTTTCCTCAGCTATAGAGGCAGCTACAGCAGCTGCAGCTTGAGTCTTGTGGGAAAGCTCCCGAAGATATCGACCAAATTTACGTACAGCGACAGTAATGACCGGAACAACAACTAAAGCCAACAATGTTAATTTCCAAGATGTTGAAAACATGAAGCCAAGACCAATTGCTGCAGTAGAAAGGTTCCTCAAGGCTTCAGAAAGATTGGTGGTAGCAGCATTTTTAATTATCTGTGTATCTTCAGATAGCCTACTAAGGAGCTCCGCTGTTCTCGTGACATCATAGAATGCTATTTCCTGATGCACAAGATGACTGAACAAATTCTTTCTTAACCGAGCAACAACCCTTTCACTGACAGCAGTAAACATCCATGCTCGAATTGCAGC…	TIGR02204, system_ATPase_and_permease_component, ABC transporter, permease/ATP-binding protein. This protein is related to a Proteobacterial ATP transporter that exports lipid A and to eukaryotic P-glycoproteins. 1.29067e-15	KOG0058, KOG0058, KOG0058, Peptide exporter, ABC superfamily [Intracellular trafficking, secretion, and vesicular transport]. 9.24974e-33	gi|1021031693|gb|KZM89477.1| hypothetical protein DCAR_023160 [Daucus carota subsp. sativus] 1.2e-92	gi|702496491|ref|XM_010038945.1| PREDICTED: Eucalyptus grandis ABC transporter B family member 25-like (LOC104426024), transcript variant X2, mRNA 3.59477e-68	pfam00664, ABC_membrane, ABC transporter transmembrane region. This family represents a unit of six transmembrane helices. Many members of the ABC transporter family (pfam00005) have two such regions. 1.42118e-09	sp|Q9FNU2|AB25B_ORYSJ ABC transporter B family member 25 OS=Oryza sativa subsp. japonica GN=OsABCB25 PE=2 SV=1 3.31006e-78	tr|A0A067FQJ3|A0A067FQJ3_CITSI Uncharacterized protein OS=Citrus sinensis GN=CISIN_1g006489mg PE=4 SV=1 1.3e-75	GO:0005524, ATP binding;GO:0005774, vacuolar membrane;GO:0016021, integral component of membrane;GO:0042626, ATPase activity, coupled to transmembrane movement of substances;GO:0055085, transmembrane transport	-
TRINITY_DN69322_c0_g1	GTTTTCTTAAATTATGGTCGTTCTGTGATTGATGATCCAAAATACCAACCTGGACTATTGATTGCTTACATGTAATAGAATACAAACCAGATGTTGGCAAAAACAAGAAAGAACTCTTTTCATTTCGATCGAAACGGCACCAACTGGATTGTTCAATGATGACAACCTTATGCAAGCTTTGGAACTGCCTCCTTGAAAGCACCACCAGCTGTTCAAGTCTTTTTCTGCAGTAATTCCTTCCTTTTAATGCTTCTTCAACTATCTCTAAATTAATTGGGAGACCCCAAGAAACATTCTTAGTTAGTTCTGTTGTCTCCCATCTCAGCTCCCACCGAAACAACGTCAGTTTTGAATTGATCCAATGGGTCATCGGCAAAATGGTCATGCCTATAATGGGCA…	PLN03211, PLN03211, ABC transporter G-25; Provisional. 3.69912e-22	KOG0061, KOG0061, KOG0061, Transporter, ABC superfamily (Breast cancer resistance protein) [Secondary metabolites biosynthesis, transport and catabolism]. 6.02793e-17	gi|1021033394|gb|KZM91178.1| hypothetical protein DCAR_021457 [Daucus carota subsp. sativus] 4.2e-87	gi|951048469|ref|XM_014664224.1| PREDICTED: Vigna radiata var. radiata ABC transporter G family member 6-like (LOC106776754), mRNA 1.34068e-32	pfam00005, ABC_tran, ABC transporter. ABC transporters for a large family of proteins responsible for translocation of a variety of compounds across biological membranes. ABC transporters are the largest family of proteins in many completely sequenced bacteria. ABC transporters are composed of two copies of this domain and two copies of a transmembrane domain pfam00664. These four domains may bel…	sp|Q9M2V6|AB17G_ARATH ABC transporter G family member 17 OS=Arabidopsis thaliana GN=ABCG17 PE=2 SV=1 2.61381e-35	tr|A0A068U524|A0A068U524_COFCA Uncharacterized protein OS=Coffea canephora GN=GSCOC_T00040150001 PE=4 SV=1 3.1e-66	GO:0005524, ATP binding;GO:0005886, plasma membrane;GO:0016021, integral component of membrane;GO:0016887, ATPase activity;GO:0042626, ATPase activity, coupled to transmembrane movement of substances	-
TRINITY_DN68730_c1_g1	GATAATTTCGCAATTGGAGTCATGTGGTTATGGCTAGCAAGTCCAAATTTCCCAAGCTTTGCACGAACAGCCTCTTGTTTACTTAGTCCCTCTTGATCTGGATGAAGGCGTAGAAGATACTCAACGGGCGTTTCCTCCATTGTCAGGAGATCAATAAAGTGCTGAGAATATCTCCCAACTCTCAGCTTTTGACTCCTTCTCACTTCACCCTCGATTGGAACCAAATCCCCAGCAAGCAGATTAAGCAAAGTAGATTTCCCAGCCCCATTAGGCCCAACAATAGCAACACGTGTACCCATATCGATACCAACATCTACGTCACAGAGTCTGAAATCCTCCCTGTTGGGATAACTGAAGGTTACTTCAATTAGTTGCATAAGCGGTGGTGTCAACTCAGTT…	PLN03073, PLN03073, ABC transporter F family; Provisional. 1.35265e-106	KOG0066, KOG0066, KOG0066, eIF2-interacting protein ABC50 (ABC superfamily) [Translation, ribosomal structure and biogenesis]. 7.11092e-136	gi|1021033531|gb|KZM91315.1| hypothetical protein DCAR_021320 [Daucus carota subsp. sativus] 1.4e-266	gi|1026088587|ref|XM_016687926.1| PREDICTED: Capsicum annuum ABC transporter F family member 4 (LOC107843602), mRNA 0.0	pfam00005, ABC_tran, ABC transporter. ABC transporters for a large family of proteins responsible for translocation of a variety of compounds across biological membranes. ABC transporters are the largest family of proteins in many completely sequenced bacteria. ABC transporters are composed of two copies of this domain and two copies of a transmembrane domain pfam00664. These four domains may bel…	sp|Q9M1H3|AB4F_ARATH ABC transporter F family member 4 OS=Arabidopsis thaliana GN=ABCF4 PE=2 SV=1 0.0	tr|A0A097P9R9|A0A097P9R9_HEVBR ABC transporter family protein OS=Hevea brasiliensis GN=ABCF4 PE=2 SV=1 7.6e-241	GO:0005215, transporter activity;GO:0005524, ATP binding;GO:0016887, ATPase activity	-
TRINITY_DN68609_c0_g4	CTCTTCCGATCTCGCAGATCTAAAAACTCCTCTAAGGCCCAATGCATAATACGGCAAAATCCAGATGCCTCTCCTCAAACAGGATGGCTCCGAAGCAGGTCGCGAGGAGCTGCCAGCCTCCTGCAGAGATATCCTGACTCTGCTCTAAAGGCCCTTACTTTTAGTTTCATAGAAGCGTCCTGCAGCTCGACAGACGCATGCAATTTGTAAAAATCGTGAACACCGCTCAAATAGCACCAGTAGAAGCCATCTTCTTCTGGAGATGCTTCTTGTATTCCCCAATCGATCCATCCCATCGTCGTACGGTCTTGTGCTCGCAGACCATAATATCCTTGGCAATCTTGTCAAGCAATCGGAAATCGTGAGAAACAACGACGACACCACCGCTGAAAGCGTTGA…	PLN03073, PLN03073, ABC transporter F family; Provisional. 3.97362e-108	KOG0927, KOG0927, KOG0927, Predicted transporter (ABC superfamily) [General function prediction only]. 3.10939e-173	gi|971510650|dbj|GAQ87542.1| abc transporter [Klebsormidium flaccidum] 2.6e-144	gi|628063288|ref|XM_007698945.1| Cochliobolus sativus ND90Pr hypothetical protein mRNA 0.0	pfam00005, ABC_tran, ABC transporter. ABC transporters for a large family of proteins responsible for translocation of a variety of compounds across biological membranes. ABC transporters are the largest family of proteins in many completely sequenced bacteria. ABC transporters are composed of two copies of this domain and two copies of a transmembrane domain pfam00664. These four domains may bel…	sp|P40024|ARB1_YEAST ABC transporter ATP-binding protein ARB1 OS=Saccharomyces cerevisiae (strain ATCC 204508 / S288c) GN=ARB1 PE=1 SV=1 0.0	tr|A0A061R4V4|A0A061R4V4_9CHLO ATP-binding cassette, subfamily F, member 2 OS=Tetraselmis sp. GSL018 GN=ABCF2 PE=4 SV=1 1.6e-141	GO:0000056, ribosomal small subunit export from nucleus;GO:0005524, ATP binding;GO:0005634, nucleus;GO:0005737, cytoplasm;GO:0016887, ATPase activity;GO:0042254, ribosome biogenesis;GO:0042624, ATPase activity, uncoupled	-
TRINITY_DN68574_c1_g4	TCACGATCCTCACCAGTCTGGAAGCGCCACTGGATGTACTCAGAGGGCGTGCTGTCGAGGTGGTTATCGATGTGGGCGAAGGCGTGCTGCTTGATGTAGGCGATACGGATGTTCTCGTGCTGGTAGATCTCACCCTGGGTAGGGATCAGCTCGCCGGTAAGCACGTTGATGAGCGTCGACTTTCCGGCACCGTTGGGGCCGATGACGGCAATACGAGAGCCCAGAGAGCACTGGAACGAGATGTCCTGGATCTGGGGCTTGGCGGTGCCGGGGTACTGGAAGCTCATCTTGGTGGCGCGGAGGATGGCCTTGGCCTTGGTCTTGACACCCTCAAGGAAACCGGGCTCGGGGAACTGGAACTCCATCTCGGAAGCGCCGAGCTCGTAGTAGGACTTGGCC…	COG0488, Uup, ATPase components of ABC transporters with duplicated ATPase domains [General function prediction only]. 2.79091e-25	KOG0066, KOG0066, KOG0066, eIF2-interacting protein ABC50 (ABC superfamily) [Translation, ribosomal structure and biogenesis]. 1.15216e-27	gi|326498279|dbj|BAJ98567.1| predicted protein [Hordeum vulgare subsp. vulgare] 1.1e-89	gi|302407170|ref|XM_003001375.1| Verticillium albo-atrum VaMs.102 elongation factor 3, mRNA 0.0	pfam00005, ABC_tran, ABC transporter. ABC transporters for a large family of proteins responsible for translocation of a variety of compounds across biological membranes. ABC transporters are the largest family of proteins in many completely sequenced bacteria. ABC transporters are composed of two copies of this domain and two copies of a transmembrane domain pfam00664. These four domains may bel…	sp|P25997|EF3_CANAL Elongation factor 3 OS=Candida albicans (strain SC5314 / ATCC MYA-2876) GN=CEF3 PE=1 SV=2 9.51487e-105	tr|F2DTZ6|F2DTZ6_HORVD Predicted protein OS=Hordeum vulgare var. distichum PE=2 SV=1 8.6e-90	GO:0003746, translation elongation factor activity;GO:0005524, ATP binding;GO:0005737, cytoplasm;GO:0016887, ATPase activity	-
TRINITY_DN68358_c0_g1	CCAATAATAAGAAGGAACATGACATTAGAGAATTTTTTTTTTGAAAATTTTGCTTGGTTGTCTAGCATTTTTCCAAAAAAAAAACTAAATGATAGAACAAGTGAATAAAGCCAATTATTGATGCTTTTGGCTTTGGAGTTTCCGATACGAAAATGATCAGTTGTTTACAAGGAATGGACACTGAAGTGTACTATGCAGAGCTGCAACTTACAAGAGAAGCATATATGCCATTTTCAATATTGATCAATTCTTGATGCTTTCCTTTCTCTACAACAACTCCGTTTTTAACCACAGCAATCAAATCAGCATTCTTTACTGTCGATAATCTATGAGCCACCACAACTGTGGTTGTTCTTCTCTCGACCATAATTTTGTCCAGGGCCTCCTGGACCACTTTTT…	cd03249, ABC_MTABC3_MDL1_MDL2, ATP-binding cassette domain of a mitochondrial protein MTABC3 and related proteins. MTABC3 (also known as ABCB6) is a mitochondrial ATP-binding cassette protein involved in iron homeostasis and one of four ABC transporters expressed in the mitochondrial inner membrane, the other three being MDL1(ABC7), MDL2, and ATM1. In fact, the yeast MDL1 (multidrug resistance-li…	KOG0055, KOG0055, KOG0055, Multidrug/pheromone exporter, ABC superfamily [Secondary metabolites biosynthesis, transport and catabolism]. 8.82878e-117	gi|1021025064|gb|KZM82852.1| hypothetical protein DCAR_030421 [Daucus carota subsp. sativus] 1.3e-156	gi|922959834|dbj|LC029927.1| Thalictrum minus ABCB2 mRNA for B-type ABC transporter, complete cds 8.3837e-125	pfam00005, ABC_tran, ABC transporter. ABC transporters for a large family of proteins responsible for translocation of a variety of compounds across biological membranes. ABC transporters are the largest family of proteins in many completely sequenced bacteria. ABC transporters are composed of two copies of this domain and two copies of a transmembrane domain pfam00664. These four domains may bel…	sp|Q9FWX7|AB11B_ARATH ABC transporter B family member 11 OS=Arabidopsis thaliana GN=ABCB11 PE=2 SV=1 7.14567e-148	tr|A5BHS9|A5BHS9_VITVI Putative uncharacterized protein OS=Vitis vinifera GN=VITISV_020814 PE=4 SV=1 9.6e-123	GO:0005524, ATP binding;GO:0005886, plasma membrane;GO:0009506, plasmodesma;GO:0010329, auxin efflux transmembrane transporter activity;GO:0010540, basipetal auxin transport;GO:0016021, integral component of membrane;GO:0042626, ATPase activity, coupled to transmembrane movement of substances	K05658-ko04976 Bile secretion;ko02010 ABC transporters
TRINITY_DN68143_c0_g1	ATCTACATGCGTTGTCGATGATTATGAAGGATCGAAATTAAAATGTAAACAATCACAAGAAGAGTACGAGAATTCCAAGATGCGTCAGCCTAAGATCGTACAAGAAGACATCAATGATTTAAAGTCTTTCCTTAAAGATATCAAAAAGGACCACCAAGCAGTTCACATTAACTTTGTTATTCCTTAAATCTTCAACAAAGTCAAATTTTCTAGATAACATCTCGGCTTCCAACAGTGCATGTACACCTCATGTGGAATCCTTACCGAGGATTATGGTTTCTCCATTGTTATAAAACTCGTGGTCAAAGTCTTTTTCAAATGGGAGGCGAATGATGCAGAGCAAGAAATAAGAGATTAATTAATTGTTTTTTTATGTTATTATTGGGGAATAAAGTTAAT…	PRK13643, cbiO, cobalt transporter ATP-binding subunit; Provisional. 1.51049e-26	KOG0055, KOG0055, KOG0055, Multidrug/pheromone exporter, ABC superfamily [Secondary metabolites biosynthesis, transport and catabolism]. 3.9379e-11	gi|1021038166|gb|KZM95949.1| hypothetical protein DCAR_019191 [Daucus carota subsp. sativus] 9.6e-96	gi|1027101802|ref|XM_016793873.1| PREDICTED: Prunus mume ABC transporter I family member 11, chloroplastic (LOC103330315), transcript variant X3, mRNA 6.45006e-112	pfam00005, ABC_tran, ABC transporter. ABC transporters for a large family of proteins responsible for translocation of a variety of compounds across biological membranes. ABC transporters are the largest family of proteins in many completely sequenced bacteria. ABC transporters are composed of two copies of this domain and two copies of a transmembrane domain pfam00664. These four domains may bel…	sp|Q8LEF6|AB11I_ARATH ABC transporter I family member 11, chloroplastic OS=Arabidopsis thaliana GN=ABCI11 PE=2 SV=1 4.4779e-97	tr|A0A061ED38|A0A061ED38_THECC Non-intrinsic ABC protein 14 OS=Theobroma cacao GN=TCM_017253 PE=4 SV=1 2.6e-85	GO:0005215, transporter activity;GO:0005524, ATP binding;GO:0009507, chloroplast;GO:0009941, chloroplast envelope;GO:0016020, membrane;GO:0016887, ATPase activity	-
TRINITY_DN68044_c6_g2	CGTGATATCATTCTGTTCGTAAGCCACGGTTCTAATAAACGCCTCTAAGCCCTATGCATCGTAATGCAGAATCCAGATGCCTCTACTGATGCAGAAAGACACTGAAGCAGGTCGCGCGGAGCTGCCAGCCTGCTGCAGAGGTATCCTGAACCCTGCTCTAAGGCCATGACTTTTTGCTAAGCGCGTCCCGTAGCTCGAAAGACGCATGCAGTGTGCAAAAACCAACCAAAACCAATCTAGAGCGCACCAAGCGACGACATCTTCTTGCGGAGATGGTTCTTGTACTCGCCGATGCTGCCGTCCCATCGTCGGACAGTCTTGTGCTCGCACACCATGATGTCCTTCGCAATCTTGTCGAGCAATCGGAAGTCGTGAGACACAACGACGACACCACCGCTG…	PLN03073, PLN03073, ABC transporter F family; Provisional. 3.17503e-109	KOG0927, KOG0927, KOG0927, Predicted transporter (ABC superfamily) [General function prediction only]. 2.51348e-179	gi|971510650|dbj|GAQ87542.1| abc transporter [Klebsormidium flaccidum] 2.1e-149	gi|169624249|ref|XM_001805479.1| Phaeosphaeria nodorum SN15 hypothetical protein partial mRNA 0.0	pfam12848, ABC_tran_Xtn, ABC transporter. This domain is an extension of some members of pfam00005 and other ABC-transporter families. 1.44627e-11	sp|P40024|ARB1_YEAST ABC transporter ATP-binding protein ARB1 OS=Saccharomyces cerevisiae (strain ATCC 204508 / S288c) GN=ARB1 PE=1 SV=1 0.0	tr|A0A061R4V4|A0A061R4V4_9CHLO ATP-binding cassette, subfamily F, member 2 OS=Tetraselmis sp. GSL018 GN=ABCF2 PE=4 SV=1 1.6e-149	GO:0000056, ribosomal small subunit export from nucleus;GO:0005524, ATP binding;GO:0005634, nucleus;GO:0005737, cytoplasm;GO:0016887, ATPase activity;GO:0042254, ribosome biogenesis;GO:0042624, ATPase activity, uncoupled	-
TRINITY_DN67901_c1_g1	GGGAAGTTTTGGTCATATTCATTCCCTTGATTTTCGCCTCCATCTTGTACCAGCAATATTATATGCCTGCATCAAGAGAACTATCGCGATTGAGTCGAGTATGCGAAGCTCCGGTTATTCAATATATTTCGGAAACTATATCGGGAATAACAACTATTAGGAGTTTTGATCAAGAGTCAAGATTTCAGTCAACATATATGACAATAGTGGATGCATATTCTCGCCCCGAGTTCCAACTTGCTGCTGCAATGAAATGGCTGTTGTTGCGGTTGGATGCATTCTCTTGTATTACATTTTGCTTCCTTTTAGTCCTCTCGATGTACTTCAGAAAAAGCATAGATCCTGCAATTGCAGGGTTAGCTGTTACATATGGACTCACCTTAAATAATAATCTATGTG…	TIGR00957, Multidrug_resistance-associated_protein_1, multi drug resistance-associated protein (MRP). This model describes multi drug resistance-associated protein (MRP) in eukaryotes. The multidrug resistance-associated protein is an integral membrane protein that causes multidrug resistance when overexpressed in mammalian cells. It belongs to ABC transporter superfamily. The protein topology an…	KOG0054, KOG0054, KOG0054, Multidrug resistance-associated protein/mitoxantrone resistance protein, ABC superfamily [Secondary metabolites biosynthesis, transport and catabolism]. 7.78624e-115	gi|1021053171|gb|KZN10949.1| hypothetical protein DCAR_003605 [Daucus carota subsp. sativus] 5.1e-196	gi|731335308|ref|XM_010680359.1| PREDICTED: Beta vulgaris subsp. vulgaris ABC transporter C family member 3-like (LOC104894183), mRNA 0.0	pfam00005, ABC_tran, ABC transporter. ABC transporters for a large family of proteins responsible for translocation of a variety of compounds across biological membranes. ABC transporters are the largest family of proteins in many completely sequenced bacteria. ABC transporters are composed of two copies of this domain and two copies of a transmembrane domain pfam00664. These four domains may bel…	sp|Q9LK64|AB3C_ARATH ABC transporter C family member 3 OS=Arabidopsis thaliana GN=ABCC3 PE=1 SV=1 0.0	tr|A0A0K9R6E7|A0A0K9R6E7_SPIOL Uncharacterized protein OS=Spinacia oleracea GN=SOVF_101510 PE=4 SV=1 1.1e-193	GO:0000325, plant-type vacuole;GO:0005524, ATP binding;GO:0005773, vacuole;GO:0005774, vacuolar membrane;GO:0008559, xenobiotic transmembrane transporting ATPase activity;GO:0009506, plasmodesma;GO:0010290, chlorophyll catabolite transmembrane transporter activity;GO:0015431, glutathione S-conjugate-exporting ATPase activity;GO:0016021, integral component of membrane;GO:0042626, ATPase activity, …	-
TRINITY_DN66051_c0_g1	GAATGACAAGATTTTGTTAGCACCATCTTTCAAAAGACTACTAGCATTGAATATTCCTGAATGGAGGCAAGCTGTACTAGGGAGTTTTGGGGCGATTTTATTTGGTGCCATTCAGCCTATATATGCTTTTACTACGGGTTCTATGATATCAGTGTATTTTTTGGCAGACCATGACAAAATTAAGGAGAAAACAAGGATGTATGCTTTGTGCTTTGTTGGGTTGGCAGTGTTCTCTTTAACTGTCAATGTAATCCAGCACTATAACTTCGCGGCTATGGGAGAGTATCTGACAAAGAGGATCAGAGAAAGAATGTTGTCCAAAATACTAACTTTCGAGATTGGTTGGTTTGATCAAGATGAGAATTCTAGTGGTGCTGTTTATTCTAGGCTCGCCAAAGA…	TIGR02203, Lipid_A_export_ATP-binding/permease_protein_msbA., lipid A export permease/ATP-binding protein MsbA. This family consists of a single polypeptide chain transporter in the ATP-binding cassette (ABC) transporter family, MsbA, which exports lipid A. It may also act in multidrug resistance. Lipid A, a part of lipopolysaccharide, is found in the outer leaflet of the outer membrane of most G…	KOG0055, KOG0055, KOG0055, Multidrug/pheromone exporter, ABC superfamily [Secondary metabolites biosynthesis, transport and catabolism]. 5.20615e-96	gi|1021044645|gb|KZN02426.1| hypothetical protein DCAR_011180 [Daucus carota subsp. sativus] 5.7e-204	gi|985454546|ref|XM_006482441.2| PREDICTED: Citrus sinensis ABC transporter B family member 15-like (LOC102610185), mRNA 3.4063e-129	pfam00664, ABC_membrane, ABC transporter transmembrane region. This family represents a unit of six transmembrane helices. Many members of the ABC transporter family (pfam00005) have two such regions. 2.62458e-24	sp|Q9LHD1|AB15B_ARATH ABC transporter B family member 15 OS=Arabidopsis thaliana GN=ABCB15 PE=3 SV=1 0.0	tr|A0A061ELX2|A0A061ELX2_THECC ABC transporter family protein isoform 1 OS=Theobroma cacao GN=TCM_018162 PE=4 SV=1 6.1e-190	GO:0005524, ATP binding;GO:0005886, plasma membrane;GO:0016021, integral component of membrane;GO:0042626, ATPase activity, coupled to transmembrane movement of substances;GO:0055085, transmembrane transport	-
TRINITY_DN64175_c0_g1	CCCGGTCCAGTAACAAGTCAATTCAACGATGATAAATTTGACAGTACGCCTCTAAAGCACAGCATTCTATCCCCGCCATCGGCGTATCCAGCCCTCATATAAGGTGATGTAGTCGGTAGGTAGTAATGCTTCCTTCCCATGCTAATGAGAGACCCAGCATCCAAATGCAACCTCAGCCTACCCACTACAAGAGCTAAGCTATATGACTGGCTGACGGTTGCCGAAATGCAGCATCAACTTTTGTTTGGTCTTTTCCGGAAAAGGAAGATGCCGATTTAGACGGCACCAGCTGCCATCATCTTCTTTCGCAAGTGGTTCTTGTACTCTCCGATCGATCCTGGCCATTTGCGGATTGTCTGGTTCTCGCACACCATGATGTCCTTGGCAATCTTATCGAGC…	PLN03073, PLN03073, ABC transporter F family; Provisional. 3.57697e-65	KOG0927, KOG0927, KOG0927, Predicted transporter (ABC superfamily) [General function prediction only]. 2.76221e-129	gi|545369230|ref|XP_005649366.1| flagellar associated protein [Coccomyxa subellipsoidea C-169] 5.4e-103	gi|597587220|ref|XM_007296605.1| Marssonina brunnea f. sp. 'multigermtubi' MB_m1 ABC transporter (MBM_08778), mRNA 0.0	pfam12848, ABC_tran_Xtn, ABC transporter. This domain is an extension of some members of pfam00005 and other ABC-transporter families. 5.29514e-10	sp|P40024|ARB1_YEAST ABC transporter ATP-binding protein ARB1 OS=Saccharomyces cerevisiae (strain ATCC 204508 / S288c) GN=ARB1 PE=1 SV=1 1.08573e-179	tr|I0Z2F3|I0Z2F3_9CHLO Flagellar associated protein OS=Coccomyxa subellipsoidea C-169 GN=COCSUDRAFT_53086 PE=4 SV=1 4.1e-103	GO:0000056, ribosomal small subunit export from nucleus;GO:0005524, ATP binding;GO:0005634, nucleus;GO:0005737, cytoplasm;GO:0016887, ATPase activity;GO:0031514, motile cilium;GO:0042254, ribosome biogenesis;GO:0042624, ATPase activity, uncoupled	-
TRINITY_DN63312_c0_g1	CAGGGTGGGTGAAACCAACCTGCCTCCTAGAACACTTAAAAGTGTAGTTTTTCCACTTCCTGATGGTCCCATAAGTGCCAGAACTTCTCCTGGGTTCACTGAACCAGTTATTCCATGTAAAATATTCTTCTCTGTTGTGAATGTCACTCCTTTGATAGTAACTTTGTAGGTCACTTCCGTGAACTTAAGGTGAATTGGCAAGGTTTGCTCTATTTGAATCTTCTTCTTTAGCGTACCAGTCTCAATATCTTCTGGAATATCATCATCGTCGTCGCTAAAGGGCCTAGAATCAGCGATGTCAC	PLN03211, PLN03211, ABC transporter G-25; Provisional. 2.84781e-12	KOG0061, KOG0061, KOG0061, Transporter, ABC superfamily (Breast cancer resistance protein) [Secondary metabolites biosynthesis, transport and catabolism]. 3.08142e-11	gi|1021035880|gb|KZM93663.1| hypothetical protein DCAR_016908 [Daucus carota subsp. sativus] 5.1e-28	gi|219816950|gb|FJ148014.1| Daucus carota subsp. sativus clone BAC C144A12 genomic sequence 1.02314e-53	pfam00005, ABC_tran, ABC transporter. ABC transporters for a large family of proteins responsible for translocation of a variety of compounds across biological membranes. ABC transporters are the largest family of proteins in many completely sequenced bacteria. ABC transporters are composed of two copies of this domain and two copies of a transmembrane domain pfam00664. These four domains may bel…	sp|Q93YS4|AB22G_ARATH ABC transporter G family member 22 OS=Arabidopsis thaliana GN=ABCG22 PE=1 SV=1 6.14199e-26	tr|A0A0J8CCQ6|A0A0J8CCQ6_BETVU Uncharacterized protein OS=Beta vulgaris subsp. vulgaris GN=BVRB_5g109050 PE=4 SV=1 3.1e-25	GO:0005524, ATP binding;GO:0005886, plasma membrane;GO:0009414, response to water deprivation;GO:0010148, transpiration;GO:0016021, integral component of membrane;GO:0016887, ATPase activity;GO:0042626, ATPase activity, coupled to transmembrane movement of substances	-
TRINITY_DN62510_c0_g1	ATCGCTCTCGTAGGTGCCAGCGGCAGTGGCAAGTCCACTGTTATGCAGCTCCTCGAGCGCTTCTACGACCCGACGAGCGGTGATGTTCTTGTTGACGAGGTGCCCCTCACCGACTATAATCTCCAAGACTACCGCGCGCAGCTGGCCATCGTCAGCCAAGAGACCACACTGTATACCGGCACAATTCGTGACAATATCCTAGCCGACAAGGACGATATTCCAGAAGAAGCTATCATTCAAGCAACCAAGGACGCAAACATCTACGAATTCATCATGTCATTACCAGACGGCTTCAACACCCTCGTCGGCGCCAAGGGTGCCCTCCTCTCTGGCGGACAGCGCCAACGCATCGCCATCGCACGCGCCCTTCTACGCAACCCCAAAATCCTCCTCCTCGAC…	cd03249, ABC_MTABC3_MDL1_MDL2, ATP-binding cassette domain of a mitochondrial protein MTABC3 and related proteins. MTABC3 (also known as ABCB6) is a mitochondrial ATP-binding cassette protein involved in iron homeostasis and one of four ABC transporters expressed in the mitochondrial inner membrane, the other three being MDL1(ABC7), MDL2, and ATM1. In fact, the yeast MDL1 (multidrug resistance-li…	KOG0055, KOG0055, KOG0055, Multidrug/pheromone exporter, ABC superfamily [Secondary metabolites biosynthesis, transport and catabolism]. 7.54967e-64	gi|565349672|ref|XP_006341813.1| PREDICTED: ABC transporter B family member 15-like [Solanum tuberosum] 1.9e-51	gi|258571735|ref|XM_002544625.1| Uncinocarpus reesii 1704 multidrug resistance protein 3, mRNA 3.20826e-18	pfam00005, ABC_tran, ABC transporter. ABC transporters for a large family of proteins responsible for translocation of a variety of compounds across biological membranes. ABC transporters are the largest family of proteins in many completely sequenced bacteria. ABC transporters are composed of two copies of this domain and two copies of a transmembrane domain pfam00664. These four domains may bel…	sp|P36619|PMD1_SCHPO Leptomycin B resistance protein pmd1 OS=Schizosaccharomyces pombe (strain 972 / ATCC 24843) GN=pmd1 PE=3 SV=2 3.15454e-71	tr|M1AQF8|M1AQF8_SOLTU Uncharacterized protein OS=Solanum tuberosum GN=PGSC0003DMG400010774 PE=4 SV=1 1.4e-51	GO:0005524, ATP binding;GO:0005773, vacuole;GO:0005886, plasma membrane;GO:0006855, drug transmembrane transport;GO:0016021, integral component of membrane;GO:0042626, ATPase activity, coupled to transmembrane movement of substances;GO:0046677, response to antibiotic	-
TRINITY_DN61255_c0_g1	GTCAGCGCATCGCATTGGCAAGAGCTATATATGCTCGAAAGGACATGGTTATTTTGGATGATGTTCTCAGTGGGCTTGACGCAGACACGGAGAACCGGGTATTCCATAGCCTTTTGGGACGCCACGGTCTGTTGCGCAAGCAATGCACGACAGTCCTAATGACCTCCTCTTCTGTCAAACGAGTTCCTTATGCAGATCATGTCATCTGTCTACAGGACAATGGGAAGATTTCCGAACAAGGTAGCTTCAGAGACTTAAACTCAGAGGAAGGGTACGTCTCATCATTCGGCCTACCACCACCTGAATGGCATTACGAGCCCGAGAAAACCAAAAACCCGTTCGATGAAAAGTCAAACCAAGGTATCATGACGTCCGTTGAGCCAGCTGAGGCTGCTGAGG…	TIGR00957, Multidrug_resistance-associated_protein_1, multi drug resistance-associated protein (MRP). This model describes multi drug resistance-associated protein (MRP) in eukaryotes. The multidrug resistance-associated protein is an integral membrane protein that causes multidrug resistance when overexpressed in mammalian cells. It belongs to ABC transporter superfamily. The protein topology an…	KOG0054, KOG0054, KOG0054, Multidrug resistance-associated protein/mitoxantrone resistance protein, ABC superfamily [Secondary metabolites biosynthesis, transport and catabolism]. 1.00173e-104	gi|502099483|ref|XP_004491490.1| PREDICTED: ABC transporter C family member 3-like [Cicer arietinum] 5.4e-88	-	pfam00005, ABC_tran, ABC transporter. ABC transporters for a large family of proteins responsible for translocation of a variety of compounds across biological membranes. ABC transporters are the largest family of proteins in many completely sequenced bacteria. ABC transporters are composed of two copies of this domain and two copies of a transmembrane domain pfam00664. These four domains may bel…	sp|P39109|YCFI_YEAST Metal resistance protein YCF1 OS=Saccharomyces cerevisiae (strain ATCC 204508 / S288c) GN=YCF1 PE=1 SV=2 6.63705e-111	tr|A0A0Q3R121|A0A0Q3R121_BRADI Uncharacterized protein OS=Brachypodium distachyon GN=BRADI_2g33210 PE=4 SV=1 3.5e-87	GO:0000329, fungal-type vacuole membrane;GO:0005524, ATP binding;GO:0006749, glutathione metabolic process;GO:0010038, response to metal ion;GO:0015127, bilirubin transmembrane transporter activity;GO:0015431, glutathione S-conjugate-exporting ATPase activity;GO:0015723, bilirubin transport;GO:0016021, integral component of membrane;GO:0042144, vacuole fusion, non-autophagic;GO:0042626, ATPase ac…	-
TRINITY_DN59439_c1_g1	TTCTCGTTTTTTTTTTTGCTTTTTTTTATTTATTTTGCTTTTTTTATTGTCGTTATTTTCTTTTTTTTTTTGTTCTTGTTTTCTAACTTAACTTTTTTTTTTCCGGATCGCGCCCTCGTCGACCCCTTCGAGCCCCGCGAGCATGCGCAGGGTGGTGGACTTGCCGCAGCCGGACGGACCGACCAGGACGAGGAACTCGCCGTCCTCCACCTCGAGGTTGAGCTGG	cd03301, ABC_MalK_N, The N-terminal ATPase domain of the maltose transporter, MalK. ATP binding cassette (ABC) proteins function from bacteria to human, mediating the translocation of substances into and out of cells or organelles. ABC transporters contain two transmembrane-spanning domains (TMDs) or subunits and two nucleotide binding domains (NBDs) or subunits that couple transport to the hydro…	KOG0060, KOG0060, KOG0060, Long-chain acyl-CoA transporter, ABC superfamily (involved in peroxisome organization and biogenesis) [Lipid transport and metabolism, General function prediction only]. 4.17799e-07	gi|870747888|gb|KMS64538.1| hypothetical protein BVRB_019260, partial [Beta vulgaris subsp. vulgaris] 2.2e-07	gi|991918726|gb|CP014313.1| Microbacterium sp. PAMC 28756, complete genome 7.60505e-29	pfam00005, ABC_tran, ABC transporter. ABC transporters for a large family of proteins responsible for translocation of a variety of compounds across biological membranes. ABC transporters are the largest family of proteins in many completely sequenced bacteria. ABC transporters are composed of two copies of this domain and two copies of a transmembrane domain pfam00664. These four domains may bel…	sp|Q2SJY7|POTA_HAHCH Spermidine/putrescine import ATP-binding protein PotA OS=Hahella chejuensis (strain KCTC 2396) GN=potA PE=3 SV=1 2.80419e-12	tr|A0A0J7YN42|A0A0J7YN42_BETVU Uncharacterized protein (Fragment) OS=Beta vulgaris subsp. vulgaris GN=BVRB_019260 PE=4 SV=1 1.7e-07	GO:0001407, glycerophosphodiester transmembrane transport;GO:0005524, ATP binding;GO:0015430, glycerol-3-phosphate-transporting ATPase activity;GO:0015594, putrescine-importing ATPase activity;GO:0015595, spermidine-importing ATPase activity;GO:0043190, ATP-binding cassette (ABC) transporter complex	-
TRINITY_DN58584_c0_g3	ATCTGTGCTCGCTCTCGGAATCGAGTGCGCTGGTGGCCTCGTCGAGGAGTAAGATCTTGGGATCGCGGATGAGCGCCCGCGCGATAGCGATGCGCTGCTTCTGCCCGCCCGAGAGCAGCGCGCCCTTGGAGCCGACGACGGTGTTGAAGCCGTCTGGTAGGGAAAGGATGAAGTCGAAGATGTTGGCCTCCTTGCAGGCGAACTCCATCTGCTCCTCTGACACGTCCGTGGCTGCGCCGAGGAGGATGTTCTCCCGGATCGTGCCCTGGTATAGGGTCGGTTCCTGCGAGACGAGAGCGATGTGCTTGCGGTAGTCGTTGACGTTGAGACTGCTGATTTCTTTACCGTCGATGAAGACGCCGCCGGCGAGGGGGTCGTAGAACCGCTCCAGCAGCGCGA…	cd03249, ABC_MTABC3_MDL1_MDL2, ATP-binding cassette domain of a mitochondrial protein MTABC3 and related proteins. MTABC3 (also known as ABCB6) is a mitochondrial ATP-binding cassette protein involved in iron homeostasis and one of four ABC transporters expressed in the mitochondrial inner membrane, the other three being MDL1(ABC7), MDL2, and ATM1. In fact, the yeast MDL1 (multidrug resistance-li…	KOG0055, KOG0055, KOG0055, Multidrug/pheromone exporter, ABC superfamily [Secondary metabolites biosynthesis, transport and catabolism]. 1.1842e-98	gi|971520087|dbj|GAQ78132.1| ATP binding cassette subfamily B [Klebsormidium flaccidum] 2.0e-82	gi|367049667|ref|XM_003655165.1| Thielavia terrestris NRRL 8126 hypothetical protein (THITE_2118647) mRNA, complete cds 0.0	pfam00005, ABC_tran, ABC transporter. ABC transporters for a large family of proteins responsible for translocation of a variety of compounds across biological membranes. ABC transporters are the largest family of proteins in many completely sequenced bacteria. ABC transporters are composed of two copies of this domain and two copies of a transmembrane domain pfam00664. These four domains may bel…	sp|P36619|PMD1_SCHPO Leptomycin B resistance protein pmd1 OS=Schizosaccharomyces pombe (strain 972 / ATCC 24843) GN=pmd1 PE=3 SV=2 2.98245e-138	tr|A9T9F3|A9T9F3_PHYPA ATP-binding cassette transporter, subfamily B, member 14, group MDR/PGP protein PpABCB14 OS=Physcomitrella patens subsp. patens GN=ppabcb14 PE=4 SV=1 3.8e-81	GO:0005524, ATP binding;GO:0005773, vacuole;GO:0005886, plasma membrane;GO:0006855, drug transmembrane transport;GO:0016021, integral component of membrane;GO:0042626, ATPase activity, coupled to transmembrane movement of substances;GO:0046677, response to antibiotic;GO:0055085, transmembrane transport	-
TRINITY_DN57980_c0_g1	CGCGTGTTTGAGGGTGACAGATAGAACAGCGGTGAGGGGGATGACCGTACCGGCTCCAGACGATGCTGGTATGTATGTATAACTTGAGGTTCGGGCGGCAGGTTCGAAAAATACCAATTATACAGAGGAACAGTCACCAAAAACGCCTGTACAGTATAACGGGTTGGGCATAAGGACAAGAAGGAGAAACAGACCCTCGCCTCGGCCCCCTCCCCCATCCTCCCGCGTCTCGGACTCTGATGCCGGCTTCCGCCAGTTCGCCCAGTAGGCCGGTCCGCCCCAGTGTTCTAGAGGAACCCTGAACGACGGGGCCGCGCGCTCGGGCCTTAAAACACTATTGGACTTTTCTTTTCCGGACTCCCCGTGGCGTGATCTATCTTACTGCCGCGCCTAGCAAGG…	TIGR00957, Multidrug_resistance-associated_protein_1, multi drug resistance-associated protein (MRP). This model describes multi drug resistance-associated protein (MRP) in eukaryotes. The multidrug resistance-associated protein is an integral membrane protein that causes multidrug resistance when overexpressed in mammalian cells. It belongs to ABC transporter superfamily. The protein topology an…	KOG0054, KOG0054, KOG0054, Multidrug resistance-associated protein/mitoxantrone resistance protein, ABC superfamily [Secondary metabolites biosynthesis, transport and catabolism]. 5.05906e-83	gi|971516520|dbj|GAQ81666.1| ABC transporter C family [Klebsormidium flaccidum] 7.3e-66	gi|367037926|ref|XM_003649296.1| Thielavia terrestris NRRL 8126 hypothetical protein (THITE_2107855) mRNA, complete cds 1.23362e-144	pfam00005, ABC_tran, ABC transporter. ABC transporters for a large family of proteins responsible for translocation of a variety of compounds across biological membranes. ABC transporters are the largest family of proteins in many completely sequenced bacteria. ABC transporters are composed of two copies of this domain and two copies of a transmembrane domain pfam00664. These four domains may bel…	sp|P32386|YBT1_YEAST ATP-dependent bile acid permease OS=Saccharomyces cerevisiae (strain ATCC 204508 / S288c) GN=YBT1 PE=1 SV=2 1.34919e-120	tr|A0A0D2SUX4|A0A0D2SUX4_GOSRA Uncharacterized protein OS=Gossypium raimondii GN=B456_008G047500 PE=4 SV=1 6.8e-64	GO:0000324, fungal-type vacuole;GO:0005524, ATP binding;GO:0005774, vacuolar membrane;GO:0006816, calcium ion transport;GO:0015432, bile acid-exporting ATPase activity;GO:0015721, bile acid and bile salt transport;GO:0016021, integral component of membrane;GO:0042626, ATPase activity, coupled to transmembrane movement of substances	-
TRINITY_DN57662_c0_g2	GGGGGACACCGTCAAAGAGGACGGTGCCAGAGGTGGGATCGTATAGGCGGGCGAGGAGGGAGAGGATGGTAGATTTTCCTGCGCCGGATCGGCCTACGAGAGCAGTAGTGCACTGGCGGTGGATGGAGAGTGTGGTGAGGTTAAGAGTCGGGGTCGAAGCGGAGTTTAGGTTTGGGTAGGTAAAATTTACGTTTTGAAGCGCGAGTTTAGGTGTAGTCGGGTCTGTTGGAGGTGGAGGAAGAGGGTCACCTGGTGCATGGTTGATGTCGGGACGTCGTGACAGGAGGTCTAAGATTTGAATGGCTGCGGATCTGGCTTTTACGAGATTGT	cd03249, ABC_MTABC3_MDL1_MDL2, ATP-binding cassette domain of a mitochondrial protein MTABC3 and related proteins. MTABC3 (also known as ABCB6) is a mitochondrial ATP-binding cassette protein involved in iron homeostasis and one of four ABC transporters expressed in the mitochondrial inner membrane, the other three being MDL1(ABC7), MDL2, and ATM1. In fact, the yeast MDL1 (multidrug resistance-li…	KOG0055, KOG0055, KOG0055, Multidrug/pheromone exporter, ABC superfamily [Secondary metabolites biosynthesis, transport and catabolism]. 9.63999e-17	gi|747093591|ref|XP_011094609.1| PREDICTED: ABC transporter B family member 1-like [Sesamum indicum] 1.1e-10	-	pfam00005, ABC_tran, ABC transporter. ABC transporters for a large family of proteins responsible for translocation of a variety of compounds across biological membranes. ABC transporters are the largest family of proteins in many completely sequenced bacteria. ABC transporters are composed of two copies of this domain and two copies of a transmembrane domain pfam00664. These four domains may bel…	sp|Q9NRK6|ABCBA_HUMAN ATP-binding cassette sub-family B member 10, mitochondrial OS=Homo sapiens GN=ABCB10 PE=1 SV=2 2.56973e-13	tr|S8D9N3|S8D9N3_9LAMI p-glycoprotein (Fragment) OS=Genlisea aurea GN=M569_15459 PE=4 SV=1 8.1e-11	GO:0005215, transporter activity;GO:0005524, ATP binding;GO:0005743, mitochondrial inner membrane;GO:0006810, transport;GO:0016021, integral component of membrane;GO:0032592, integral component of mitochondrial membrane;GO:0042626, ATPase activity, coupled to transmembrane movement of substances;GO:0055085, transmembrane transport	-
TRINITY_DN57494_c0_g1	GGCTATGGTATGGTCCAAACTACCTTTTGGGCGTGTTCATCCTCTTTGGGTTGGCAACATACCTGGGCACATACGTTATTTCGCTATTCACCAGGAAAGCAGCATTTGCCATTGCAGCTGGGTTACATGTCCTTTTGGCCGTACTTTACATCGTCGCCTATGTTATGAACTCCTCCTTCGGTGACGAGAGTCGTTTGTTCGAGACATACAATTCTCTCCAATTTGGTCTTGGCCTGTCATCGCCTGGTGCAAATTTAGTCCGAGCACTATTCCTATCGAGCAACAGCTTCGAAATTCTATGTGGAAAGTACGCTGACAATGATGTATCTTCTCCCTTCAGCTACGACAGATACGGATCTGTATACGCCAACCTGATCATCCAGATCCTGTTTCTGATTT…	cd03263, ABC_subfamily_A, ATP-binding cassette domain of the lipid transporters, subfamily A. The ABCA subfamily mediates the transport of a variety of lipid compounds. Mutations of members of ABCA subfamily are associated with human genetic diseases, such as, familial high-density lipoprotein (HDL) deficiency, neonatal surfactant deficiency, degenerative retinopathies, and congenital keratinizat…	KOG0059, KOG0059, KOG0059, Lipid exporter ABCA1 and related proteins, ABC superfamily [Lipid transport and metabolism, General function prediction only]. 1.18277e-47	gi|695079124|ref|XP_009386971.1| PREDICTED: ABC transporter A family member 1 [Musa acuminata subsp. malaccensis] 1.3e-40	-	pfam00005, ABC_tran, ABC transporter. ABC transporters for a large family of proteins responsible for translocation of a variety of compounds across biological membranes. ABC transporters are the largest family of proteins in many completely sequenced bacteria. ABC transporters are composed of two copies of this domain and two copies of a transmembrane domain pfam00664. These four domains may bel…	sp|Q84M24|AB1A_ARATH ABC transporter A family member 1 OS=Arabidopsis thaliana GN=ABCA1 PE=2 SV=2 1.23515e-44	tr|M0U950|M0U950_MUSAM Uncharacterized protein OS=Musa acuminata subsp. malaccensis PE=4 SV=1 1.0e-40	GO:0005215, transporter activity;GO:0005524, ATP binding;GO:0005774, vacuolar membrane;GO:0006869, lipid transport;GO:0016021, integral component of membrane;GO:0016887, ATPase activity;GO:0042626, ATPase activity, coupled to transmembrane movement of substances	K05643-ko02010 ABC transporters
TRINITY_DN53804_c0_g2	GTTTACGTTGACGGACGAGACATCACCTCCCTGAACATCAAAGCGTTGCGGTCGCATCTGGCGCTTGTTTCTCAGGAACCGTCGCTTTATCAAGGCACCATTCGTGAGAACATCCTTCTCGGACTGGGGAAGGATTCCGAAGGCGCTTCCGATGAATCCATCATACAGGCAAGCAAACTGGCCAACATATACGATTTTATCATCTCCCTCCCACAAGGATTTGATACTGTTGTGGGCAGTAGGGGGTCAACGCTTTCTGGAGGACAGAAGCAACGTATAGCAATTGCACGAGCGCTTATACGAGAT	cd03249, ABC_MTABC3_MDL1_MDL2, ATP-binding cassette domain of a mitochondrial protein MTABC3 and related proteins. MTABC3 (also known as ABCB6) is a mitochondrial ATP-binding cassette protein involved in iron homeostasis and one of four ABC transporters expressed in the mitochondrial inner membrane, the other three being MDL1(ABC7), MDL2, and ATM1. In fact, the yeast MDL1 (multidrug resistance-li…	KOG0058, KOG0058, KOG0058, Peptide exporter, ABC superfamily [Intracellular trafficking, secretion, and vesicular transport]. 5.92668e-30	gi|567141498|ref|XP_006395367.1| hypothetical protein EUTSA_v10003534mg [Eutrema salsugineum] 1.3e-26	-	pfam00005, ABC_tran, ABC transporter. ABC transporters for a large family of proteins responsible for translocation of a variety of compounds across biological membranes. ABC transporters are the largest family of proteins in many completely sequenced bacteria. ABC transporters are composed of two copies of this domain and two copies of a transmembrane domain pfam00664. These four domains may bel…	sp|P36619|PMD1_SCHPO Leptomycin B resistance protein pmd1 OS=Schizosaccharomyces pombe (strain 972 / ATCC 24843) GN=pmd1 PE=3 SV=2 6.01424e-34	tr|V4KYY0|V4KYY0_EUTSA Uncharacterized protein OS=Eutrema salsugineum GN=EUTSA_v10003534mg PE=4 SV=1 9.8e-27	GO:0005524, ATP binding;GO:0005773, vacuole;GO:0005886, plasma membrane;GO:0006855, drug transmembrane transport;GO:0016021, integral component of membrane;GO:0042626, ATPase activity, coupled to transmembrane movement of substances;GO:0046677, response to antibiotic	-
TRINITY_DN50716_c0_g1	GAAAGACATCGCCCTGTCTGGGCGCCCGGATGTCGACAAAGAGGCAGCTCGTGTGCTGGCCTCCCAAGAGGATCTCTTACGTATGTTGCGCACGTCCAAGACGTTTGGCTCAAAGGTTGCCGTGGAAGACGTATCGCTTGGAATGCGTGAAGGAGAGATTCTCGCACTGCTTGGTCCGAACGGAGCCGGCAAGACGACATGCATCAACATGATCCGTGGCGACATGGTTCCCTCTTCAGGACAGATTCTGCTCCAAGGGGTAGACGTGCGGAAGAATAAGCATCTCGCCCAGCAATATCTCGGCGTTTGCCCACAATTTGACGCCCTTGACCTGTTGACTGTCAAGGAACATCTGACTTTCTATGCGCGATGCAAGGGAGTCGTCGATATTCCGGCCGA…	cd03263, ABC_subfamily_A, ATP-binding cassette domain of the lipid transporters, subfamily A. The ABCA subfamily mediates the transport of a variety of lipid compounds. Mutations of members of ABCA subfamily are associated with human genetic diseases, such as, familial high-density lipoprotein (HDL) deficiency, neonatal surfactant deficiency, degenerative retinopathies, and congenital keratinizat…	KOG0059, KOG0059, KOG0059, Lipid exporter ABCA1 and related proteins, ABC superfamily [Lipid transport and metabolism, General function prediction only]. 6.23415e-52	gi|1012184519|ref|XP_015969081.1| PREDICTED: LOW QUALITY PROTEIN: ABC transporter A family member 1 [Arachis duranensis] 4.4e-47	-	pfam00005, ABC_tran, ABC transporter. ABC transporters for a large family of proteins responsible for translocation of a variety of compounds across biological membranes. ABC transporters are the largest family of proteins in many completely sequenced bacteria. ABC transporters are composed of two copies of this domain and two copies of a transmembrane domain pfam00664. These four domains may bel…	sp|Q84M24|AB1A_ARATH ABC transporter A family member 1 OS=Arabidopsis thaliana GN=ABCA1 PE=2 SV=2 3.10919e-54	tr|A0A0B2PDM2|A0A0B2PDM2_GLYSO ABC transporter A family member 1 OS=Glycine soja GN=glysoja_012663 PE=4 SV=1 5.7e-47	GO:0005524, ATP binding;GO:0005774, vacuolar membrane;GO:0006869, lipid transport;GO:0015417, polyamine-transporting ATPase activity;GO:0015439, heme-transporting ATPase activity;GO:0016021, integral component of membrane;GO:0042626, ATPase activity, coupled to transmembrane movement of substances;GO:0103115, protoheme IX ABC transporter activity	-
TRINITY_DN49814_c0_g1	TGACGAGAAGAAAGACGGCGCCGACAAAGATGGAGAAAAGAAAATCGAGAAGAAGCCTGGTGGTTTCGAAAATATTTCTTTCAAAATCAAAGCCGGTGGGACAGTCGCGATCTTGGGCAGAAGTGGTAGTGGCAAATCAACACTCGCCGGCGCGATTTCACGAACTTGGGATCTCGACAAGGGTCAGATATTGATTGGTGGACGTGATATCAAGGATTACACGCTTGTTCGGCTTCACGAAGGCATTGGTCTTGTACCTCAAAAGGCGTCTCTATTCCGTCGGGCGGTTATGCAGAATGTCAAGTACGGGCGTATGACTGCCACGGATGAAGAAGTTTATGAAGCCTGCAAGAAAGCCTGTATTCACGACAAAATCATGGAAATGCCGCATGGTTACGA…	cd03253, ABCC_ATM1_transporter, ATP-binding cassette domain of iron-sulfur clusters transporter, subfamily C. ATM1 is an ABC transporter that is expressed in the mitochondria. Although the specific function of ATM1 is unknown, its disruption results in the accumulation of excess mitochondrial iron, loss of mitochondrial cytochromes, oxidative damage to mitochondrial DNA, and decreased levels of c…	KOG0057, KOG0057, KOG0057, Mitochondrial Fe/S cluster exporter, ABC superfamily [Intracellular trafficking, secretion, and vesicular transport]. 4.34768e-45	gi|159490304|ref|XP_001703119.1| mitochondrial half-size ABC transporter, membrane protein [Chlamydomonas reinhardtii] 2.9e-35	-	pfam00005, ABC_tran, ABC transporter. ABC transporters for a large family of proteins responsible for translocation of a variety of compounds across biological membranes. ABC transporters are the largest family of proteins in many completely sequenced bacteria. ABC transporters are composed of two copies of this domain and two copies of a transmembrane domain pfam00664. These four domains may bel…	sp|Q2G2M9|Y2003_STAA8 Putative multidrug export ATP-binding/permease protein SAOUHSC_02003 OS=Staphylococcus aureus (strain NCTC 8325) GN=SAOUHSC_02003 PE=3 SV=1 1.2002e-43	tr|Q6VTH1|Q6VTH1_CHLRE ATP-binding cassette half-transporter cadmium sensitive 1 OS=Chlamydomonas reinhardtii GN=Cds1 PE=2 SV=1 2.2e-35	GO:0005524, ATP binding;GO:0005743, mitochondrial inner membrane;GO:0005886, plasma membrane;GO:0006879, cellular iron ion homeostasis;GO:0016021, integral component of membrane;GO:0034040, lipid-transporting ATPase activity;GO:0042626, ATPase activity, coupled to transmembrane movement of substances;GO:0055085, transmembrane transport	-
TRINITY_DN48589_c0_g1	CGAAACGACAACTATACCGAGAAAAGGATCGGGCAGAAAACAAGACAATCTTCGAGTCCGTATCGAACTGGCAGACAGTCACCTACTTCAACCGTGGATCCTACGAGCGAGGCCGTTACGGCGCTGCGGTGAGCGAATCTGTGAAGGCCGAGAACAGCTACTACGTCATTGGTTCTCTCTCCTGGGCCGCTCAGAGCCTGGTGATGACTCTCGGTCTTATGGCAGCCTCCTTCCTTGCTGTGTACCAGATTTGCTTCCGTAACAAACCTGTAGGCAATTTCGTCACGCTTTTGATGTATTGGGGGGGCCTTATGTATCCATTGCACAAAGTCGCAACCTCCTACCGCCGAGTCTCCATGGCACTAATCGACGCTGAGAGACTGCTCCAACTCCTCCAGA…	COG5265, ATM1, ABC-type transport system involved in Fe-S cluster assembly, permease and ATPase components [Posttranslational modification, protein turnover, chaperones]. 4.233e-51	KOG0056, KOG0056, KOG0056, Heavy metal exporter HMT1, ABC superfamily [Inorganic ion transport and metabolism]. 9.34528e-56	gi|694443090|ref|XP_009348170.1| PREDICTED: heavy metal tolerance protein-like [Pyrus x bretschneideri] 4.3e-47	-	pfam00005, ABC_tran, ABC transporter. ABC transporters for a large family of proteins responsible for translocation of a variety of compounds across biological membranes. ABC transporters are the largest family of proteins in many completely sequenced bacteria. ABC transporters are composed of two copies of this domain and two copies of a transmembrane domain pfam00664. These four domains may bel…	sp|Q02592|HMT1_SCHPO Heavy metal tolerance protein OS=Schizosaccharomyces pombe (strain 972 / ATCC 24843) GN=hmt1 PE=2 SV=3 2.94446e-63	tr|A0A0E0A4F3|A0A0E0A4F3_9ORYZ Uncharacterized protein OS=Oryza glumipatula PE=4 SV=1 1.0e-40	GO:0000329, fungal-type vacuole membrane;GO:0005524, ATP binding;GO:0005743, mitochondrial inner membrane;GO:0005773, vacuole;GO:0006879, cellular iron ion homeostasis;GO:0016021, integral component of membrane;GO:0036246, phytochelatin 2 import into vacuole;GO:0036249, cadmium ion import into vacuole;GO:0042626, ATPase activity, coupled to transmembrane movement of substances;GO:0044604, phytoch…	-
TRINITY_DN47875_c0_g1	GGAGGGTCCTCTGCAGCGCTCGAACAAGACCGCGTTGTACAGCAATGCTTTCTATGCGCTGTCTCAGTCGATGATCTTCTTCGTTATTGCCCTTGTCTTCTGGTACGGCTCCAAGCTCGTCGGGTCTCAAGAGTACTCGACCAACGCCTTTTTCATTGTTCTCATGTCTACCACTTTCGGTTCGATCCAAGCCGGCAACGTCTTCATGTTCGTCCCCGATATGTCTTCTGCCAAGGGTGCCGCCAACGATATTATCAACCTCCTCGACTCGATTCCCGAGATCGATGCCGAGTCGCCCGATGGCAAGAAGGTTCCGACCGCCGAGGGCCGCATCGTTCTTGAAGATATCCACTTCCGCTACCCCACTCGTCCCGGTGTCCGTGTCCTGCGCAACCTCAA…	TIGR02204, system_ATPase_and_permease_component, ABC transporter, permease/ATP-binding protein. This protein is related to a Proteobacterial ATP transporter that exports lipid A and to eukaryotic P-glycoproteins. 1.78932e-30	KOG0055, KOG0055, KOG0055, Multidrug/pheromone exporter, ABC superfamily [Secondary metabolites biosynthesis, transport and catabolism]. 9.86395e-42	gi|225465026|ref|XP_002264708.1| PREDICTED: ABC transporter B family member 15-like isoform X1 [Vitis vinifera] 1.2e-39	-	pfam00005, ABC_tran, ABC transporter. ABC transporters for a large family of proteins responsible for translocation of a variety of compounds across biological membranes. ABC transporters are the largest family of proteins in many completely sequenced bacteria. ABC transporters are composed of two copies of this domain and two copies of a transmembrane domain pfam00664. These four domains may bel…	sp|P36619|PMD1_SCHPO Leptomycin B resistance protein pmd1 OS=Schizosaccharomyces pombe (strain 972 / ATCC 24843) GN=pmd1 PE=3 SV=2 2.07502e-49	tr|F6H9X9|F6H9X9_VITVI Putative uncharacterized protein OS=Vitis vinifera GN=VIT_19s0085g00060 PE=4 SV=1 9.5e-40	GO:0005524, ATP binding;GO:0005773, vacuole;GO:0005886, plasma membrane;GO:0006855, drug transmembrane transport;GO:0016021, integral component of membrane;GO:0042626, ATPase activity, coupled to transmembrane movement of substances;GO:0046677, response to antibiotic;GO:0055085, transmembrane transport	-
TRINITY_DN45643_c0_g1	GTGTCCCTGGGTTCTCGTATTGCTGTCATCGGTCCCAACGGTGCCGGCAAGTCCACCCTCGTCAACGTCCTCACCGGTGAACTCATTCCCACATCTGGTGAGATCTACCAGCATGAGAACATCCGTATTGCCTACATCAAGCAACACGCCTTCGCTCACATCGATAACTTCCTCGACAAGACCCCGTCAGAGTACATCCAGTGGCGATTCCAGACTGGTGAAGATCGTGAGACCATGGACCGAGCCAAC	PLN03073, PLN03073, ABC transporter F family; Provisional. 7.56444e-13	KOG0066, KOG0066, KOG0066, eIF2-interacting protein ABC50 (ABC superfamily) [Translation, ribosomal structure and biogenesis]. 3.55378e-15	gi|326498279|dbj|BAJ98567.1| predicted protein [Hordeum vulgare subsp. vulgare] 1.4e-39	gi|629670858|ref|XM_007799184.1| Eutypa lata UCREL1 putative elongation factor 3 protein mRNA 1.01858e-82	pfam00005, ABC_tran, ABC transporter. ABC transporters for a large family of proteins responsible for translocation of a variety of compounds across biological membranes. ABC transporters are the largest family of proteins in many completely sequenced bacteria. ABC transporters are composed of two copies of this domain and two copies of a transmembrane domain pfam00664. These four domains may bel…	sp|Q75EV6|EF3_ASHGO Elongation factor 3 OS=Ashbya gossypii (strain ATCC 10895 / CBS 109.51 / FGSC 9923 / NRRL Y-1056) GN=TEF3 PE=3 SV=2 9.16686e-47	tr|F2DTZ6|F2DTZ6_HORVD Predicted protein OS=Hordeum vulgare var. distichum PE=2 SV=1 1.1e-39	GO:0003746, translation elongation factor activity;GO:0005524, ATP binding;GO:0016887, ATPase activity	-
TRINITY_DN42630_c0_g1	GACGACGGCGCTCGTTGGCGCCTCCGGAAGCGGGAAGTCGACCATCGTGGGATTGGTCGAGAGGTTCTACTCGCCCGTCGAGGGCAAAGTCTATCTGGACGACGTGGATATTTCGACGCTCAACCTGCGCTGGCTTCGTCGTCAGATTTCACTCGTGTCGCAGGAGCCGACCCTGTTCGGTACTACCATCTACGAGAACATCAGACACGGTCTCATTGGTACCAAATGGGAGCAAGATTCGCCCGAGCAACAAGAGGAGCGCATCTACGAGGCTGCCAGGAAAGCCAATGCCCAC	cd03249, ABC_MTABC3_MDL1_MDL2, ATP-binding cassette domain of a mitochondrial protein MTABC3 and related proteins. MTABC3 (also known as ABCB6) is a mitochondrial ATP-binding cassette protein involved in iron homeostasis and one of four ABC transporters expressed in the mitochondrial inner membrane, the other three being MDL1(ABC7), MDL2, and ATM1. In fact, the yeast MDL1 (multidrug resistance-li…	KOG0055, KOG0055, KOG0055, Multidrug/pheromone exporter, ABC superfamily [Secondary metabolites biosynthesis, transport and catabolism]. 1.33001e-26	gi|552842966|ref|XP_005850708.1| hypothetical protein CHLNCDRAFT_34209 [Chlorella variabilis] 4.9e-23	-	pfam00005, ABC_tran, ABC transporter. ABC transporters for a large family of proteins responsible for translocation of a variety of compounds across biological membranes. ABC transporters are the largest family of proteins in many completely sequenced bacteria. ABC transporters are composed of two copies of this domain and two copies of a transmembrane domain pfam00664. These four domains may bel…	sp|P36619|PMD1_SCHPO Leptomycin B resistance protein pmd1 OS=Schizosaccharomyces pombe (strain 972 / ATCC 24843) GN=pmd1 PE=3 SV=2 1.6527e-32	tr|E1Z685|E1Z685_CHLVA Putative uncharacterized protein OS=Chlorella variabilis GN=CHLNCDRAFT_34209 PE=4 SV=1 3.7e-23	GO:0005524, ATP binding;GO:0005773, vacuole;GO:0005886, plasma membrane;GO:0006855, drug transmembrane transport;GO:0016021, integral component of membrane;GO:0042626, ATPase activity, coupled to transmembrane movement of substances;GO:0046677, response to antibiotic	-
TRINITY_DN41800_c0_g1	ACTCAATCGGAGAATCTCCCCGAAGAAAACCAAGAGGTCTCTCCAGGCTGGCCATCAATAGGCAGGATTGACGTCTCCAATATTTCTGCCACATATTCGCAAGACCTCAATCCAGCACTTCAAGATGTCAGCATCTCCATTCCAGCAGGTCAAAAAGTCGGGATTTGTGGCCCATCAGGCTCGGGCAAGTCTTCTTTCGTCGCGGTGCTCTTCCACATGTTGAATATCCAGAGCGGCAAAATCACAATCGACGATGTCGACATCTCCAAAATTCCGCGACAGACGCTCCGAGAACACTTGTCCGTCATACCGCAAGATCCAATATTTCTCAAAG	cd03369, ABCC_NFT1, ATP-binding cassette domain 2 of NFT1, subfamily C. Domain 2 of NFT1 (New full-length MRP-type transporter 1). NFT1 belongs to the MRP (multidrug resistance-associated protein) family of ABC transporters. Some of the MRP members have five additional transmembrane segments in their N-terminus, but the function of these additional membrane-spanning domains is not clear. The MRP …	KOG0054, KOG0054, KOG0054, Multidrug resistance-associated protein/mitoxantrone resistance protein, ABC superfamily [Secondary metabolites biosynthesis, transport and catabolism]. 8.76378e-24	gi|302762354|ref|XP_002964599.1| ATP-binding cassette transporter, subfamily C, member 1, cluster I, SmABCC1 [Selaginella moellendorffii] 7.5e-20	-	pfam00005, ABC_tran, ABC transporter. ABC transporters for a large family of proteins responsible for translocation of a variety of compounds across biological membranes. ABC transporters are the largest family of proteins in many completely sequenced bacteria. ABC transporters are composed of two copies of this domain and two copies of a transmembrane domain pfam00664. These four domains may bel…	sp|Q63563|ABCC9_RAT ATP-binding cassette sub-family C member 9 OS=Rattus norvegicus GN=Abcc9 PE=1 SV=1 2.8792e-25	tr|D8R085|D8R085_SELML ATP-binding cassette transporter, subfamily C, member 1, cluster I, SmABCC1 OS=Selaginella moellendorffii GN=SmABCC1 PE=4 SV=1 5.7e-20	GO:0005267, potassium channel activity;GO:0005524, ATP binding;GO:0005739, mitochondrion;GO:0005886, plasma membrane;GO:0006932, substrate-dependent cell migration, cell contraction;GO:0008144, drug binding;GO:0008281, sulfonylurea receptor activity;GO:0008282, inward rectifying potassium channel;GO:0010107, potassium ion import;GO:0015459, potassium channel regulator activity;GO:0016021, integra…	-
TRINITY_DN34345_c0_g1	ATCGCCCGTTACAGAGTGGCACCATCGAAGTCGATAACGTGTCATTTGCTTATCGCGATGACAATCTGGTGCTAAAGAACATTAATCTCTCTGTGCCTTCGCGTAACTTTGTGGCACTGGTCGGGCATACCGGCAGTGGCAAAAGCACCCTCGCCAGTTTATTGATGGGCTATTACCCGCTAACGGAAGGTGAGATTCGCCTTGATGGTCGTCCATTAAGTTCGCTAAGTCACAGCGCGCTGCGCCAGGGCGTGGCAATGGTGCAGCAAGATCCGGTGGTGCTGGCGGATACCTTCCTCG	PRK10790, PRK10790, putative multidrug transporter membrane\ATP-binding components; Provisional. 2.32576e-60	KOG0058, KOG0058, KOG0058, Peptide exporter, ABC superfamily [Intracellular trafficking, secretion, and vesicular transport]. 9.85866e-22	gi|1004137221|gb|KXZ45248.1| hypothetical protein GPECTOR_56g344 [Gonium pectorale] 1.7e-15	gi|1008889473|gb|CP014768.1| Shigella sp. PAMC 28760, complete genome 2.45103e-154	pfam00005, ABC_tran, ABC transporter. ABC transporters for a large family of proteins responsible for translocation of a variety of compounds across biological membranes. ABC transporters are the largest family of proteins in many completely sequenced bacteria. ABC transporters are composed of two copies of this domain and two copies of a transmembrane domain pfam00664. These four domains may bel…	sp|P0AAG5|MDLB_ECOLI Multidrug resistance-like ATP-binding protein MdlB OS=Escherichia coli (strain K12) GN=mdlB PE=1 SV=1 3.5041e-63	tr|Q6VTH1|Q6VTH1_CHLRE ATP-binding cassette half-transporter cadmium sensitive 1 OS=Chlamydomonas reinhardtii GN=Cds1 PE=2 SV=1 1.7e-15	GO:0005524, ATP binding;GO:0005743, mitochondrial inner membrane;GO:0005886, plasma membrane;GO:0006879, cellular iron ion homeostasis;GO:0008559, xenobiotic transmembrane transporting ATPase activity;GO:0016021, integral component of membrane;GO:0034040, lipid-transporting ATPase activity;GO:0042626, ATPase activity, coupled to transmembrane movement of substances;GO:0055085, transmembrane trans…	-
TRINITY_DN34299_c0_g1	GGGCATCAACCAAATGAACATGTGCCAAGCCCTCGTATTCATGACGGGCATACTCGTCGCCATGATGACGTGCGCCTTTGAGGTGTCACAGGGCATCCGGACTGTGGGCAACTTCGTTTCGTTGATAACCTACCTAGGCCAACTCCAAGGCCCGCTCAATTTCTTTGGTACCTTCTACCGAACTGTCCAGCAAGCCATGATCTCGGGCGAACGCCTCTTGGAGCTGTTCAAGATCCAACCGACCGTGGTTGACCAACCCGGCGTGAAGCCCCTTCAGAAGTGTGATGGCCACATCAAGTGGAGCAACGTTCGCTTCTCGTACGACCGGCGCAGGCCTGCGCTCCGCAACCTCTCGTTTGAGTGCCGCCCAGGGACTACTACTGCCTTCGTCGGCGAGTC…	COG5265, ATM1, ABC-type transport system involved in Fe-S cluster assembly, permease and ATPase components [Posttranslational modification, protein turnover, chaperones]. 1.79688e-79	KOG0056, KOG0056, KOG0056, Heavy metal exporter HMT1, ABC superfamily [Inorganic ion transport and metabolism]. 9.7254e-95	gi|971508888|dbj|GAQ89311.1| ABC transporter ATP-binding protein [Klebsormidium flaccidum] 4.5e-68	gi|927414349|ref|XM_014097531.1| Trichoderma virens Gv29-8 hypothetical protein partial mRNA 7.46962e-79	pfam00005, ABC_tran, ABC transporter. ABC transporters for a large family of proteins responsible for translocation of a variety of compounds across biological membranes. ABC transporters are the largest family of proteins in many completely sequenced bacteria. ABC transporters are composed of two copies of this domain and two copies of a transmembrane domain pfam00664. These four domains may bel…	sp|Q02592|HMT1_SCHPO Heavy metal tolerance protein OS=Schizosaccharomyces pombe (strain 972 / ATCC 24843) GN=hmt1 PE=2 SV=3 7.86583e-95	tr|E1ZNE0|E1ZNE0_CHLVA Putative uncharacterized protein OS=Chlorella variabilis GN=CHLNCDRAFT_58798 PE=4 SV=1 2.7e-65	GO:0000329, fungal-type vacuole membrane;GO:0005524, ATP binding;GO:0005743, mitochondrial inner membrane;GO:0005773, vacuole;GO:0006879, cellular iron ion homeostasis;GO:0016021, integral component of membrane;GO:0036246, phytochelatin 2 import into vacuole;GO:0036249, cadmium ion import into vacuole;GO:0042626, ATPase activity, coupled to transmembrane movement of substances;GO:0044604, phytoch…	-
TRINITY_DN33733_c0_g1	GAGTTTCTTCAACTGTGAGCATCGGGAATAATAAATCATCTTGCATCACGTACACTGATATGACTTCGGATAATCGCGATTCAAGTTGTTCATTGTTGAGTGTTATTGTTCCATTTAAGCTTCGTTTTGCGATTCTATTTGCCAATGCATCAATCAATGTTGATTTTCCGCATCATGAGGCGCCAAGTATGGCGAGTATTTCGCCTTCTTGCGCCTCTCCTGAAACTGTTCTCGAAAACACTCTCTGATTTAAACAGTTGCGTTGTAGTTGAA	cd03213, ABCG_EPDR, Eye pigment and drug resistance transporter subfamily G of the ATP-binding cassette superfamily. ABCG transporters are involved in eye pigment (EP) precursor transport, regulation of lipid-trafficking mechanisms, and pleiotropic drug resistance (DR). DR is a well-described phenomenon occurring in fungi and shares several similarities with processes in bacteria and higher eukar…	KOG0061, KOG0061, KOG0061, Transporter, ABC superfamily (Breast cancer resistance protein) [Secondary metabolites biosynthesis, transport and catabolism]. 1.12917e-16	gi|976922523|gb|KVI06907.1| AAA+ ATPase domain-containing protein [Cynara cardunculus var. scolymus] 1.6e-25	-	pfam00005, ABC_tran, ABC transporter. ABC transporters for a large family of proteins responsible for translocation of a variety of compounds across biological membranes. ABC transporters are the largest family of proteins in many completely sequenced bacteria. ABC transporters are composed of two copies of this domain and two copies of a transmembrane domain pfam00664. These four domains may bel…	sp|Q9LFG8|AB20G_ARATH ABC transporter G family member 20 OS=Arabidopsis thaliana GN=ABCG20 PE=2 SV=1 7.28313e-32	tr|A0A103YD59|A0A103YD59_CYNCS AAA+ ATPase domain-containing protein OS=Cynara cardunculus var. scolymus GN=Ccrd_014737 PE=4 SV=1 1.3e-25	GO:0005524, ATP binding;GO:0005886, plasma membrane;GO:0010345, suberin biosynthetic process;GO:0016021, integral component of membrane;GO:0016887, ATPase activity;GO:0042626, ATPase activity, coupled to transmembrane movement of substances	-
TRINITY_DN33471_c0_g1	GTTTGAAAAGGTCGGATCGTGACTGATGGATTGTGAGAATCAAGGTTCGGCCTTCATTGGAAAGACCTTGAAGGACTTCCATAATTGAATTCGCAGTGAAAGCGTCGAGACCGGATGTAGGCTCGTCCAGGAGGAGCACACGAGGGTCAGTGAGAATCTGAACAGCGATTGAAACTCGACGTTTTTCTCCTCCTGATATTCCCTTGACCAAATCCGAACCGATAAGATTGTCGGCACAGTCTTTGAGACCTAGCTTCATAAGAACCTCTTCGGCCCGTTCATACTTTTGTGCTGTGGTCATGAAAGGTGGAAGTCGAAG	cd03234, ABCG_White, White pigment protein homolog of ABCG transporter subfamily. The White subfamily represents ABC transporters homologous to the Drosophila white gene, which acts as a dimeric importer for eye pigment precursors. The eye pigmentation of Drosophila is developed from the synthesis and deposition in the cells of red pigments, which are synthesized from guanine, and brown pigments,…	KOG0061, KOG0061, KOG0061, Transporter, ABC superfamily (Breast cancer resistance protein) [Secondary metabolites biosynthesis, transport and catabolism]. 1.0744e-30	gi|1026070320|ref|XP_016579568.1| PREDICTED: ABC transporter G family member 26 isoform X2 [Capsicum annuum] 1.3e-26	-	pfam00005, ABC_tran, ABC transporter. ABC transporters for a large family of proteins responsible for translocation of a variety of compounds across biological membranes. ABC transporters are the largest family of proteins in many completely sequenced bacteria. ABC transporters are composed of two copies of this domain and two copies of a transmembrane domain pfam00664. These four domains may bel…	sp|Q08234|YO075_YEAST Uncharacterized ABC transporter ATP-binding protein/permease YOL075C OS=Saccharomyces cerevisiae (strain ATCC 204508 / S288c) GN=YOL075C PE=1 SV=3 8.1795e-35	tr|U5D9M9|U5D9M9_AMBTC Uncharacterized protein OS=Amborella trichopoda GN=AMTR_s00061p00187570 PE=3 SV=1 3.0e-26	GO:0000329, fungal-type vacuole membrane;GO:0005524, ATP binding;GO:0005886, plasma membrane;GO:0006810, transport;GO:0008559, xenobiotic transmembrane transporting ATPase activity;GO:0010152, pollen maturation;GO:0010584, pollen exine formation;GO:0016021, integral component of membrane;GO:0016887, ATPase activity;GO:0035690, cellular response to drug;GO:0042626, ATPase activity, coupled to tran…	-
TRINITY_DN29217_c0_g1	GTGCAATTTCTTGGACTTCGCCAGCAAAAGCCTGGCTGGTCTTGATATTTCCGAGACGCTCTTCCGCGATCTTCATCAATGAGCCGACGTTCTTCTGAATCTGCCGACTAACATTCCTTATCACCCGGCCATAAAAGAAGGCGCCAACGGCAATGGGCGGGAACATGACGAGGATGATAGATGTGAGCTTGGGACTCATCCAGGTCATCGCAGCAAAGCCAGCAGATCCGCTAACGAGGGCTCGGAGTCCATCTGACAGGTTCTGGGTTATGCTTTTACCGACAACAACAGTGTCCGAGTTGAGGCGTGAGATCAGGTCGCCGACGCGGTTCGCATCGAAGAACTCGGCGTCTTGCACGTAGGTCCTCCGGTAAAGCTGTGTCCGGAGCCTCGCCACCA…	TIGR00958, Antigen_peptide_transporter_2, Conjugate Transporter-2 (CT2) Family protein. [Transport and binding proteins, Other]. 1.76477e-18	KOG0058, KOG0058, KOG0058, Peptide exporter, ABC superfamily [Intracellular trafficking, secretion, and vesicular transport]. 4.92954e-36	gi|971508583|dbj|GAQ89630.1| ABC transporter [Klebsormidium flaccidum] 4.4e-20	-	pfam00664, ABC_membrane, ABC transporter transmembrane region. This family represents a unit of six transmembrane helices. Many members of the ABC transporter family (pfam00005) have two such regions. 9.46668e-16	sp|P33310|MDL1_YEAST ATP-dependent permease MDL1, mitochondrial OS=Saccharomyces cerevisiae (strain ATCC 204508 / S288c) GN=MDL1 PE=1 SV=2 2.50806e-47	tr|W5FSJ3|W5FSJ3_WHEAT Uncharacterized protein OS=Triticum aestivum PE=4 SV=1 2.2e-19	GO:0005524, ATP binding;GO:0005743, mitochondrial inner membrane;GO:0015421, oligopeptide-transporting ATPase activity;GO:0016021, integral component of membrane;GO:0016887, ATPase activity;GO:0042626, ATPase activity, coupled to transmembrane movement of substances;GO:0090374, oligopeptide export from mitochondrion	-
TRINITY_DN29200_c0_g1	GCCCGTTGCTAGTTGCGTATGGTACGAGCTTGCGGGAGAACCATGCGCAGTTCTCGGCGCTACAGGTTATTACGTGCCCCGAAGATCTCTATTGCACTCATAAATCTCCAGCAGCGAGGTGAAGCTAAGGGAGAATTCTTAACATAGAGGAGGGATTAAAATACATATCAGAGCGAGGTCGGGTATCGCATATTTTCCCAGGTCCCTTACAAGCAAATTATCATGGCCATGTGTTGGCATCTATATGCAGACCCGGCGCGTTTATCAACCCGAACTTGGAAACACCGTGGAAATGTACACGAAAAAGAAAACACCTCCTCTCTATCGGTCCAAGGCCTGGTTGTGACACATGTGCCAGTAGACACCCTTCAACTTGAGCAGCTCAGCGTGGTTGCCTTT…	cd03249, ABC_MTABC3_MDL1_MDL2, ATP-binding cassette domain of a mitochondrial protein MTABC3 and related proteins. MTABC3 (also known as ABCB6) is a mitochondrial ATP-binding cassette protein involved in iron homeostasis and one of four ABC transporters expressed in the mitochondrial inner membrane, the other three being MDL1(ABC7), MDL2, and ATM1. In fact, the yeast MDL1 (multidrug resistance-li…	KOG0055, KOG0055, KOG0055, Multidrug/pheromone exporter, ABC superfamily [Secondary metabolites biosynthesis, transport and catabolism]. 3.26207e-100	gi|593782879|ref|XP_007154480.1| hypothetical protein PHAVU_003G122400g [Phaseolus vulgaris] 1.2e-88	gi|615455447|ref|XM_007596111.1| Colletotrichum fioriniae PJ7 ABC transporter transmembrane region mRNA 6.61683e-123	pfam00664, ABC_membrane, ABC transporter transmembrane region. This family represents a unit of six transmembrane helices. Many members of the ABC transporter family (pfam00005) have two such regions. 6.03878e-22	sp|P36619|PMD1_SCHPO Leptomycin B resistance protein pmd1 OS=Schizosaccharomyces pombe (strain 972 / ATCC 24843) GN=pmd1 PE=3 SV=2 5.46501e-120	tr|V7C8K3|V7C8K3_PHAVU Uncharacterized protein OS=Phaseolus vulgaris GN=PHAVU_003G122400g PE=4 SV=1 8.9e-89	GO:0005524, ATP binding;GO:0005773, vacuole;GO:0005886, plasma membrane;GO:0006855, drug transmembrane transport;GO:0016021, integral component of membrane;GO:0042626, ATPase activity, coupled to transmembrane movement of substances;GO:0046677, response to antibiotic	-
TRINITY_DN2487_c0_g1	CGGTGACGCCCTTTTCGCGCATCTCGTACAATGAGTCCGGGTAAATAATCTGCTGGCGCAAGCTCCCACGACTCAAGTACGGCCGCTGCGGGATGTAGAAGATGTCTTCAAATGGTGGTTTCCTGACGTGTCCGCCGTAGACGGGCCACAAGCCACCAAGGATGCGGAACAGGCTGGATTTGCCGCATCCGTTGGGGCCAACGATGAGCAGGTGGTCGCCGGGGCGAACGGTGAAGGAGAGTTTGCGCACGAGCACGTCCCCGTTGGGAGACACGATGGGGACATTAGTGAATTCGATGTCGGATCCTTCTTCGACGGTGCCGCGACCGGCG	TIGR00954, Peroxisomal_long-chain_fatty_acid_import_protein_1, Peroxysomal Fatty Acyl CoA Transporter (FAT) Family protei. [Transport and binding proteins, Carbohydrates, organic alcohols, and acids]. 1.32551e-41	KOG0064, KOG0064, KOG0064, Peroxisomal long-chain acyl-CoA transporter, ABC superfamily [Lipid transport and metabolism]. 4.24299e-43	gi|694452438|ref|XP_009351166.1| PREDICTED: uncharacterized protein LOC103942705 [Pyrus x bretschneideri] 7.9e-30	gi|121701404|ref|XM_001268966.1| Aspergillus clavatus NRRL 1 ABC fatty acid transporter, putative (ACLA_022550), partial mRNA 5.29109e-52	pfam00005, ABC_tran, ABC transporter. ABC transporters for a large family of proteins responsible for translocation of a variety of compounds across biological membranes. ABC transporters are the largest family of proteins in many completely sequenced bacteria. ABC transporters are composed of two copies of this domain and two copies of a transmembrane domain pfam00664. These four domains may bel…	sp|Q61285|ABCD2_MOUSE ATP-binding cassette sub-family D member 2 OS=Mus musculus GN=Abcd2 PE=1 SV=1 9.24692e-41	tr|A0A0D2QYC6|A0A0D2QYC6_GOSRA Uncharacterized protein OS=Gossypium raimondii GN=B456_007G239200 PE=4 SV=1 1.4e-26	GO:0000038, very long-chain fatty acid metabolic process;GO:0005524, ATP binding;GO:0005739, mitochondrion;GO:0005777, peroxisome;GO:0005778, peroxisomal membrane;GO:0006635, fatty acid beta-oxidation;GO:0016021, integral component of membrane;GO:0032000, positive regulation of fatty acid beta-oxidation;GO:0042626, ATPase activity, coupled to transmembrane movement of substances;GO:0042760, very …	-
TRINITY_DN213593_c0_g1	TGGCCGGTCACGCCGCTTGCGCACCGTCAGACCGAAGCTGATGTTCTGCGCGACCGTCATGTGCCGGAAGAGCGCATAATTCTGGAACACGAAGCCGATCCGCCGCTCGGCGGCTGGGGTACCGGTCATGTCCTGCCCGTCGAACAGGACATGCCCTTCATCCGCGAAATCCAGCCCGGCGATGGTTCGCAGCAGCGTGGTCTTACCCGATCCCGATGGCCCCAGAAGCGCGAGGAACTCGCCCG	cd03296, ABC_CysA_sulfate_importer, ATP-binding cassette domain of the sulfate transporter. Part of the ABC transporter complex cysAWTP involved in sulfate import. Responsible for energy coupling to the transport system. The complex is composed of two ATP-binding proteins (cysA), two transmembrane proteins (cysT and cysW), and a solute-binding protein (cysP). ABC transporters are a large family o…	KOG0055, KOG0055, KOG0055, Multidrug/pheromone exporter, ABC superfamily [Secondary metabolites biosynthesis, transport and catabolism]. 7.58302e-09	gi|34222631|sp|Q9G4F5.1|CYSA_CUCSA RecName: Full=Sulfate/thiosulfate import ATP-binding protein cysA; AltName: Full=Sulfate-transporting ATPase 9.0e-23	-	pfam00005, ABC_tran, ABC transporter. ABC transporters for a large family of proteins responsible for translocation of a variety of compounds across biological membranes. ABC transporters are the largest family of proteins in many completely sequenced bacteria. ABC transporters are composed of two copies of this domain and two copies of a transmembrane domain pfam00664. These four domains may bel…	sp|Q9A7X1|CYSA_CAUCR Sulfate/thiosulfate import ATP-binding protein CysA OS=Caulobacter crescentus (strain ATCC 19089 / CB15) GN=cysA PE=3 SV=2 2.40063e-37	tr|A0A097KQB8|A0A097KQB8_9CHLO Probable transport protein OS=Dicloster acuatus GN=cysA PE=4 SV=1 6.4e-21	GO:0005524, ATP binding;GO:0009507, chloroplast;GO:0015419, ATPase-coupled sulfate transmembrane transporter activity;GO:0016020, membrane;GO:0042626, ATPase activity, coupled to transmembrane movement of substances;GO:0043190, ATP-binding cassette (ABC) transporter complex	-
TRINITY_DN209751_c0_g1	GTCGGTCAGGGGGAGCATGAACTCTCCATCCTCACCGGAGTTGAGCTGGTTGTCAAACGTGGCGAGACCATCGCACTGGTGGGCGAGTCGGGATCGGGTAAGTCAACCTTGCTGGCGATCCTCGCCGGGCTTGATGACGGCAGCAGTGGCGAAGTGAGTCTGGTGGGACAACCGCTACATAATATGGACGAAGAAGCGCGGGCAAAGTTGCGCGCGAAGCACGTCGGCTTTGT	PRK10584, PRK10584, putative ABC transporter ATP-binding protein YbbA; Provisional. 2.68246e-46	KOG0055, KOG0055, KOG0055, Multidrug/pheromone exporter, ABC superfamily [Secondary metabolites biosynthesis, transport and catabolism]. 6.84006e-12	gi|870826185|gb|KMS94018.1| hypothetical protein BVRB_025620, partial [Beta vulgaris subsp. vulgaris] 1.8e-12	gi|1028475309|gb|CP015240.1| Escherichia coli strain 2011C-3911, complete genome 3.22821e-117	pfam00005, ABC_tran, ABC transporter. ABC transporters for a large family of proteins responsible for translocation of a variety of compounds across biological membranes. ABC transporters are the largest family of proteins in many completely sequenced bacteria. ABC transporters are composed of two copies of this domain and two copies of a transmembrane domain pfam00664. These four domains may bel…	sp|P0A9U0|YBBA_SHIFL Uncharacterized ABC transporter ATP-binding protein YbbA OS=Shigella flexneri GN=ybbA PE=3 SV=1 2.42595e-46	tr|A0A0J8B2B9|A0A0J8B2B9_BETVU Uncharacterized protein (Fragment) OS=Beta vulgaris subsp. vulgaris GN=BVRB_025620 PE=4 SV=1 1.4e-12	GO:0005524, ATP binding;GO:0006810, transport;GO:0016887, ATPase activity	-
TRINITY_DN208925_c0_g1	GCAGAAGCGGGTGAGGCAAATCAACTGTGATTGCCCTGTTGCAAAGGTTTCATGACCCAATTAAAGGAGATATATTGATCGATGGGGTACCTATTAATAAACTTCAACTAAAATGGATGAGATCACAAATGGGACTAGTGAGTCAGGAGCCATCACTATTTGCCACTATAATTAAAGAGAATATTCTTTTTGGCAAAGAAGATGCTAGTATGGACGAGGTTATTGAAGCTGCTAAATCTTCAAATGCT	cd03249, ABC_MTABC3_MDL1_MDL2, ATP-binding cassette domain of a mitochondrial protein MTABC3 and related proteins. MTABC3 (also known as ABCB6) is a mitochondrial ATP-binding cassette protein involved in iron homeostasis and one of four ABC transporters expressed in the mitochondrial inner membrane, the other three being MDL1(ABC7), MDL2, and ATM1. In fact, the yeast MDL1 (multidrug resistance-li…	KOG0055, KOG0055, KOG0055, Multidrug/pheromone exporter, ABC superfamily [Secondary metabolites biosynthesis, transport and catabolism]. 1.03713e-25	gi|1021048097|gb|KZN05877.1| hypothetical protein DCAR_006714 [Daucus carota subsp. sativus] 9.7e-33	-	pfam00005, ABC_tran, ABC transporter. ABC transporters for a large family of proteins responsible for translocation of a variety of compounds across biological membranes. ABC transporters are the largest family of proteins in many completely sequenced bacteria. ABC transporters are composed of two copies of this domain and two copies of a transmembrane domain pfam00664. These four domains may bel…	sp|Q9LSJ5|AB18B_ARATH ABC transporter B family member 18 OS=Arabidopsis thaliana GN=ABCB18 PE=3 SV=1 4.79341e-41	tr|A0A0B0PKS7|A0A0B0PKS7_GOSAR ABC transporter B family member 15 OS=Gossypium arboreum GN=F383_30754 PE=4 SV=1 3.7e-32	GO:0005524, ATP binding;GO:0016021, integral component of membrane;GO:0042626, ATPase activity, coupled to transmembrane movement of substances;GO:0055085, transmembrane transport	-
TRINITY_DN207803_c0_g1	CAGTTGCTTCTGGATCCGCATATTTCAGGTTGTACATGAGTGTTTCGTTGAACAAGACAGTATCCTGCGGGACAACTCCGATATGTCGGCGAAGTGAGTCGATTGTGATGTCTTCCACGTCGTGTCCGTCCACCTGAATGTTGCCGGCCTGGACGTTATAGAATCGGAAGAGAAGCCGAAAGACCGTAGATTTGCCACCGCCTGATTCTCCAACAAAAGCAGTGGTCGTTCCTGGTGCACAGTGGAAATCGAGACCGTTTAGAGCCGGCTTTCGGGTGTCGTATGAGAATCGTACATAGTTGAACCGAATGTCGCCTTGGCAGGATGGAAGAATCTCCGCAGATGGTTTATCGACCACGGTGGGCTGCTCCTTG	COG5265, ATM1, ABC-type transport system involved in Fe-S cluster assembly, permease and ATPase components [Posttranslational modification, protein turnover, chaperones]. 3.75376e-40	KOG0056, KOG0056, KOG0056, Heavy metal exporter HMT1, ABC superfamily [Inorganic ion transport and metabolism]. 2.42384e-42	gi|971508888|dbj|GAQ89311.1| ABC transporter ATP-binding protein [Klebsormidium flaccidum] 5.8e-29	-	pfam00005, ABC_tran, ABC transporter. ABC transporters for a large family of proteins responsible for translocation of a variety of compounds across biological membranes. ABC transporters are the largest family of proteins in many completely sequenced bacteria. ABC transporters are composed of two copies of this domain and two copies of a transmembrane domain pfam00664. These four domains may bel…	sp|Q02592|HMT1_SCHPO Heavy metal tolerance protein OS=Schizosaccharomyces pombe (strain 972 / ATCC 24843) GN=hmt1 PE=2 SV=3 5.24501e-42	tr|W1PB81|W1PB81_AMBTC Uncharacterized protein OS=Amborella trichopoda GN=AMTR_s00077p00170260 PE=4 SV=1 9.8e-29	GO:0000329, fungal-type vacuole membrane;GO:0005524, ATP binding;GO:0005743, mitochondrial inner membrane;GO:0005773, vacuole;GO:0006879, cellular iron ion homeostasis;GO:0016021, integral component of membrane;GO:0036246, phytochelatin 2 import into vacuole;GO:0036249, cadmium ion import into vacuole;GO:0042626, ATPase activity, coupled to transmembrane movement of substances;GO:0044604, phytoch…	-
TRINITY_DN206926_c0_g1	GTGCGATCGAAACTCTCTGCTTCTGCCCACCACTTAAGCTTATGCCTTTATTGCCGATGTTAGTGTTATAGCCGTCTGGGAGGGAAATGATAAAGTCGTGGATATTCGCGTCCTTGCAGACCTCGTGCAGTTGGTCGTCTGTAATGCTGGCCGGATCCACGCCAAGAAGTATGTTTTCCCTGATCGTACCCTGGAAGAGGCTTGGCTCCTGAGCAACCAGCGAGAGCAGTTTCCGATACTCGTACAGGTTGATCTCGGTGATGTCTTTATCGTTGAACAGGATCCGCCCTTTGCCAACATCGTAGAATCTCTCCAGCAAGCTCACAATAGATGTCTTA	cd03249, ABC_MTABC3_MDL1_MDL2, ATP-binding cassette domain of a mitochondrial protein MTABC3 and related proteins. MTABC3 (also known as ABCB6) is a mitochondrial ATP-binding cassette protein involved in iron homeostasis and one of four ABC transporters expressed in the mitochondrial inner membrane, the other three being MDL1(ABC7), MDL2, and ATM1. In fact, the yeast MDL1 (multidrug resistance-li…	KOG0058, KOG0058, KOG0058, Peptide exporter, ABC superfamily [Intracellular trafficking, secretion, and vesicular transport]. 5.39764e-33	gi|1032289219|gb|OAP03546.1| PGP17 [Arabidopsis thaliana] 1.9e-26	-	pfam00005, ABC_tran, ABC transporter. ABC transporters for a large family of proteins responsible for translocation of a variety of compounds across biological membranes. ABC transporters are the largest family of proteins in many completely sequenced bacteria. ABC transporters are composed of two copies of this domain and two copies of a transmembrane domain pfam00664. These four domains may bel…	sp|P36619|PMD1_SCHPO Leptomycin B resistance protein pmd1 OS=Schizosaccharomyces pombe (strain 972 / ATCC 24843) GN=pmd1 PE=3 SV=2 1.1267e-34	tr|I1QKH8|I1QKH8_ORYGL Uncharacterized protein OS=Oryza glaberrima PE=4 SV=1 2.4e-26	GO:0005524, ATP binding;GO:0005773, vacuole;GO:0005886, plasma membrane;GO:0006855, drug transmembrane transport;GO:0008361, regulation of cell size;GO:0009506, plasmodesma;GO:0009637, response to blue light;GO:0009640, photomorphogenesis;GO:0009733, response to auxin;GO:0009926, auxin polar transport;GO:0009958, positive gravitropism;GO:0010328, auxin influx transmembrane transporter activity;GO…	-
TRINITY_DN206692_c0_g1	CCGAGGCGACACCAAGTGGCATTGTCACAAACAATGCCACAAGGGCCAACTTCCAGCCGTATGCGAATGAGATGGCAAGAGCACCCACCAGCGTGAAAACTCCGATGATCACCATCATCAAATTGACGCCCAGGAGCTCCTTCAGCGCCGTAGGATCGCCCGAAAGCCTCGCTGTAAGCTGGCCAGTCGAGTTCTCGTCTTGGTCGAAGTAGG	pfam00664, ABC_membrane, ABC transporter transmembrane region. This family represents a unit of six transmembrane helices. Many members of the ABC transporter family (pfam00005) have two such regions. 1.3874e-08	KOG0055, KOG0055, KOG0055, Multidrug/pheromone exporter, ABC superfamily [Secondary metabolites biosynthesis, transport and catabolism]. 3.32549e-07	gi|1026761579|gb|OAE23014.1| hypothetical protein AXG93_1231s1270 [Marchantia polymorpha subsp. polymorpha] 3.0e-06	-	pfam00664, ABC_membrane, ABC transporter transmembrane region. This family represents a unit of six transmembrane helices. Many members of the ABC transporter family (pfam00005) have two such regions. 3.31462e-09	sp|Q54BT3|ABCB2_DICDI ABC transporter B family member 2 OS=Dictyostelium discoideum GN=abcB2 PE=3 SV=1 7.42228e-08	tr|A5BVK9|A5BVK9_VITVI Putative uncharacterized protein OS=Vitis vinifera GN=VITISV_009891 PE=4 SV=1 8.6e-06	GO:0005215, transporter activity;GO:0005524, ATP binding;GO:0016021, integral component of membrane;GO:0042626, ATPase activity, coupled to transmembrane movement of substances;GO:0055085, transmembrane transport	-
TRINITY_DN201293_c0_g1	GCTGAAACACCATGCCGATACGGCGCGAGCGCAATGCACGCAAGGCCTTGCTGCTCAGCTCGCTGATGGCCTCGCCTTCAATCAACACCTCGCCACTGGTGGGCTCGATCAAGCGGTTGATGTGCCGCAGCAACGTCGACTTGCCACTGCCGGAGGTGCCCATCAGGCAGAGGACTTCTCCGCGGCGTACCTTCAAGTTGATATTGCTGACGGCTGGCAGCGCCGACGCGTCTTTTCGCG	cd03294, ABC_Pro_Gly_Betaine, ATP-binding cassette domain of the osmoprotectant proline/glycine betaine uptake system. This family comprises the glycine betaine/L-proline ATP binding subunit in bacteria and its equivalents in archaea. This transport system belong to the larger ATP-Binding Cassette (ABC) transporter superfamily. The characteristic feature of these transporters is the obligatory co…	KOG0055, KOG0055, KOG0055, Multidrug/pheromone exporter, ABC superfamily [Secondary metabolites biosynthesis, transport and catabolism]. 3.90061e-11	gi|223523728|gb|EEF27170.1| abc transporter, putative, partial [Ricinus communis] 5.0e-10	gi|787852299|gb|CP011110.1| Pseudomonas chlororaphis strain PCL1606, complete genome 1.34573e-36	pfam00005, ABC_tran, ABC transporter. ABC transporters for a large family of proteins responsible for translocation of a variety of compounds across biological membranes. ABC transporters are the largest family of proteins in many completely sequenced bacteria. ABC transporters are composed of two copies of this domain and two copies of a transmembrane domain pfam00664. These four domains may bel…	sp|Q9KFL0|PHNC2_BACHD Phosphonates import ATP-binding protein PhnC 2 OS=Bacillus halodurans (strain ATCC BAA-125 / DSM 18197 / FERM 7344 / JCM 9153 / C-125) GN=phnC2 PE=3 SV=2 6.73698e-14	tr|B9TAE7|B9TAE7_RICCO Abc transporter, putative (Fragment) OS=Ricinus communis GN=RCOM_0056190 PE=4 SV=1 3.8e-10	GO:0005524, ATP binding;GO:0015416, ATPase-coupled organic phosphonate transmembrane transporter activity;GO:0015418, quaternary-ammonium-compound-transporting ATPase activity;GO:0043190, ATP-binding cassette (ABC) transporter complex	-
TRINITY_DN198622_c0_g1	GCCGGAAGTCCTGGAAGACGCAGCCGATGGACTGGCGCAGGCGGGGGACCCTGCGCCGGGACATGCGGACCACGTCGAAGTTGGCTACGTAGACGCGCCCCTTCGTGGGCACCTCTTCACGCAGCAGCAGCCGGAGGAAGGTCGATTTTCCCGACCCGGATGCACCGATGAGGAAGACGAACTCGCCTTTGTCCATCTCGACGGAGACGTCCTCCA	COG2884, FtsE, Predicted ATPase involved in cell division [Cell division and chromosome partitioning]. 2.74857e-15	KOG0927, KOG0927, KOG0927, Predicted transporter (ABC superfamily) [General function prediction only]. 1.13531e-06	-	gi|255918463|gb|CP001630.1| Actinosynnema mirum DSM 43827, complete genome 1.92161e-59	pfam00005, ABC_tran, ABC transporter. ABC transporters for a large family of proteins responsible for translocation of a variety of compounds across biological membranes. ABC transporters are the largest family of proteins in many completely sequenced bacteria. ABC transporters are composed of two copies of this domain and two copies of a transmembrane domain pfam00664. These four domains may bel…	sp|O05779|FTSE_MYCTU Cell division ATP-binding protein FtsE OS=Mycobacterium tuberculosis (strain ATCC 25618 / H37Rv) GN=ftsE PE=1 SV=2 1.92778e-20	-	GO:0000287, magnesium ion binding;GO:0005524, ATP binding;GO:0005886, plasma membrane;GO:0007049, cell cycle;GO:0016887, ATPase activity;GO:0030145, manganese ion binding;GO:0051301, cell division	-
TRINITY_DN198614_c0_g1	GGGGGTTGTAGTCCCCGGCGAGTTTTCACCGGACATTGGATCGTCATCGTGCACGGCTTGGAGTTTCTTCATCTTCTCTTCCGCGCGGATCTGGCGGTACCACATGACGGAGTACCTGCCCTTAAGGGCGAGCAGTTCCTCGTGGGTGCCGACTTCGGCAACCTGGCCGTTGGCTACAACGACGATTTGGTTGGCATTTGTGATGGTCGATAGACGATGGGCAATGACAAGAGTGGTTCGGCCAGCAGTCAATTCGCGGAGGGCGGATTGGATGTGTTGCTCGGTCTCGGTGTCGAGGGATGCGGTAGCTTCATCCAAAAGAATGATTTTGGGGTTCTTGATAATGGTGCGAGCAATAGCAACCCTCTGCTTCTCTCCACCGGACAGACGCAGTCCTCT…	COG5265, ATM1, ABC-type transport system involved in Fe-S cluster assembly, permease and ATPase components [Posttranslational modification, protein turnover, chaperones]. 4.25173e-127	KOG0056, KOG0056, KOG0056, Heavy metal exporter HMT1, ABC superfamily [Inorganic ion transport and metabolism]. 9.37029e-146	gi|159490304|ref|XP_001703119.1| mitochondrial half-size ABC transporter, membrane protein [Chlamydomonas reinhardtii] 5.3e-100	gi|748483348|ref|XM_011108849.1| Dactylellina haptotyla CBS 200.50 hypothetical protein mRNA 0.0	pfam00005, ABC_tran, ABC transporter. ABC transporters for a large family of proteins responsible for translocation of a variety of compounds across biological membranes. ABC transporters are the largest family of proteins in many completely sequenced bacteria. ABC transporters are composed of two copies of this domain and two copies of a transmembrane domain pfam00664. These four domains may bel…	sp|Q02592|HMT1_SCHPO Heavy metal tolerance protein OS=Schizosaccharomyces pombe (strain 972 / ATCC 24843) GN=hmt1 PE=2 SV=3 5.70741e-150	tr|Q6VTH1|Q6VTH1_CHLRE ATP-binding cassette half-transporter cadmium sensitive 1 OS=Chlamydomonas reinhardtii GN=Cds1 PE=2 SV=1 4.0e-100	GO:0000329, fungal-type vacuole membrane;GO:0005524, ATP binding;GO:0005743, mitochondrial inner membrane;GO:0005773, vacuole;GO:0006879, cellular iron ion homeostasis;GO:0016021, integral component of membrane;GO:0036246, phytochelatin 2 import into vacuole;GO:0036249, cadmium ion import into vacuole;GO:0042626, ATPase activity, coupled to transmembrane movement of substances;GO:0044604, phytoch…	K05663-ko02010 ABC transporters
TRINITY_DN198406_c0_g1	GAAGACAACGCCGCCGTGCTCAAGGGCAGAGGCAAGGTGATTGAGAGCAAGGACATTGAGTTCATCGATGTCCCCATTATCTCGCCCAATGGCGATGTCCTCATCAAGGCCCTCTCTTTCGCCCTCAAACAAGGCGATCACTTGCTCGTTGTCGGCCCTAATGGCTGCGGCAAGTCGTCTCTCTTCCGCATCCTCGGCGGGCTATGGCCCGTCTACGGCGGCACCGTGTACAAACCGCCTTTCACTGATATCTTCTATATCCCACAGCGACCCTACCTCTCGCGTGGGTCTCTCCGGCAGCAGATCATCTACCCGGATGGCCTCCGAACGATGCACG	TIGR00954, Peroxisomal_long-chain_fatty_acid_import_protein_1, Peroxysomal Fatty Acyl CoA Transporter (FAT) Family protei. [Transport and binding proteins, Carbohydrates, organic alcohols, and acids]. 1.3442e-38	KOG0064, KOG0064, KOG0064, Peroxisomal long-chain acyl-CoA transporter, ABC superfamily [Lipid transport and metabolism]. 2.03045e-35	gi|694452438|ref|XP_009351166.1| PREDICTED: uncharacterized protein LOC103942705 [Pyrus x bretschneideri] 1.4e-26	-	pfam00005, ABC_tran, ABC transporter. ABC transporters for a large family of proteins responsible for translocation of a variety of compounds across biological membranes. ABC transporters are the largest family of proteins in many completely sequenced bacteria. ABC transporters are composed of two copies of this domain and two copies of a transmembrane domain pfam00664. These four domains may bel…	sp|P33897|ABCD1_HUMAN ATP-binding cassette sub-family D member 1 OS=Homo sapiens GN=ABCD1 PE=1 SV=2 2.39015e-39	tr|D7M963|D7M963_ARALL Peroxisomal abc transporter OS=Arabidopsis lyrata subsp. lyrata GN=ARALYDRAFT_490770 PE=4 SV=1 2.9e-24	GO:0005215, transporter activity;GO:0005324, long-chain fatty acid transporter activity;GO:0005524, ATP binding;GO:0005737, cytoplasm;GO:0005739, mitochondrion;GO:0005777, peroxisome;GO:0005778, peroxisomal membrane;GO:0005779, integral component of peroxisomal membrane;GO:0005829, cytosol;GO:0006635, fatty acid beta-oxidation;GO:0007031, peroxisome organization;GO:0015910, peroxisomal long-chain…	-
TRINITY_DN198059_c0_g1	AGTTGACCTATCTACCGACCTCGTCGCCGAACGCAAGCGCCTCACCTCCCCCTCTACCACTCTCCGCGTCGACTCAGTCACCAAACGCTTCGGGTCGAATCTCGCTGTCGACGCCGTAACTTTTGGCGTGCAATCGTCTGAGATCTTCGCATTGCTCGGCCCTAATGGCGCTGGAAAATCGACAATCATATCCATGATCCGCGGCGACATCAAGCCGTCTA	cd03269, ABC_putative_ATPase, ATP-binding cassette domain of an uncharacterized transporter. This subgroup is related to the subfamily A transporters involved in drug resistance, nodulation, lipid transport, and bacteriocin and lantibiotic immunity. In eubacteria and archaea, the typical organization consists of one ABC and one or two integral membranes. ABC transporters are a large family of pro…	KOG0059, KOG0059, KOG0059, Lipid exporter ABCA1 and related proteins, ABC superfamily [Lipid transport and metabolism, General function prediction only]. 1.03941e-08	gi|1009159836|ref|XP_015898031.1| PREDICTED: ABC transporter A family member 1-like, partial [Ziziphus jujuba] 2.4e-06	-	pfam00005, ABC_tran, ABC transporter. ABC transporters for a large family of proteins responsible for translocation of a variety of compounds across biological membranes. ABC transporters are the largest family of proteins in many completely sequenced bacteria. ABC transporters are composed of two copies of this domain and two copies of a transmembrane domain pfam00664. These four domains may bel…	sp|O07016|YVFR_BACSU Uncharacterized ABC transporter ATP-binding protein YvfR OS=Bacillus subtilis (strain 168) GN=yvfR PE=3 SV=1 1.43912e-11	tr|A0A0S3RXE0|A0A0S3RXE0_PHAAN Uncharacterized protein OS=Vigna angularis var. angularis GN=Vigan.04G277400 PE=4 SV=1 2.4e-06	GO:0005215, transporter activity;GO:0005524, ATP binding;GO:0006810, transport;GO:0016021, integral component of membrane;GO:0016887, ATPase activity	-
TRINITY_DN196159_c0_g1	GTTAAAGAGACGAGGTTCCTGTTCGACTACCCGAATTTGGCTTCTATACCACTTCATGTCTAGGTTTTGGATATCTGTGCCGTCGAGGTATATATTCCCTTGGTTTGGTTGGATCCACCTGTCCAGAAGATCCATTATAGTGGACTTGCCGCCGCCACTTGGTCCTACAAGTGCCGTGGATTGATTCGGCTCAAACACAAGACTCATAGATTTCAACACATCGATATTCGGTCGAGAAGGATACGCGAAGCAAACATTTTTCATGACAATTCTGCCTTCGCAATTACTCGGTACGGACGCAATTTTTGACTGACGTTCCATGTCAGGCTTTCGCTCTATCGTCTCCATGATTGTCTTGGTGGCGACTTTGGCTTTGAGAACCATTCCTACAGCAGGAAT…	cd03249, ABC_MTABC3_MDL1_MDL2, ATP-binding cassette domain of a mitochondrial protein MTABC3 and related proteins. MTABC3 (also known as ABCB6) is a mitochondrial ATP-binding cassette protein involved in iron homeostasis and one of four ABC transporters expressed in the mitochondrial inner membrane, the other three being MDL1(ABC7), MDL2, and ATM1. In fact, the yeast MDL1 (multidrug resistance-li…	KOG0055, KOG0055, KOG0055, Multidrug/pheromone exporter, ABC superfamily [Secondary metabolites biosynthesis, transport and catabolism]. 1.47351e-37	gi|703130431|ref|XP_010104606.1| ABC transporter B family member 19 [Morus notabilis] 1.3e-26	-	pfam00005, ABC_tran, ABC transporter. ABC transporters for a large family of proteins responsible for translocation of a variety of compounds across biological membranes. ABC transporters are the largest family of proteins in many completely sequenced bacteria. ABC transporters are composed of two copies of this domain and two copies of a transmembrane domain pfam00664. These four domains may bel…	sp|O95342|ABCBB_HUMAN Bile salt export pump OS=Homo sapiens GN=ABCB11 PE=1 SV=2 1.08799e-30	tr|W9RX74|W9RX74_9ROSA ABC transporter B family member 19 OS=Morus notabilis GN=L484_005037 PE=4 SV=1 1.0e-26	GO:0005215, transporter activity;GO:0005524, ATP binding;GO:0005886, plasma membrane;GO:0005887, integral component of plasma membrane;GO:0006699, bile acid biosynthetic process;GO:0006810, transport;GO:0008554, sodium-exporting ATPase activity, phosphorylative mechanism;GO:0015126, canalicular bile acid transmembrane transporter activity;GO:0015432, bile acid-exporting ATPase activity;GO:0015721…	-
TRINITY_DN19254_c0_g1	ACTCACATTTTCATGGACAGTACCCACCAGTCCATGGGCAATACTCTCGTAGATTGTAGTACTGAAAAGCACAGGCTCCTGGCTGACAATGGCCATATGTTGTCTGAGCCATCTCAAATTCAATTTACTGATGTCTTTGCCATCGAGAAGAATTTCACCACTCATTGGCAAGTAGAAGCGCTCCAATAGTCCAACAATAGTTGACTTTCCAGAGCCGGACGCACCAACAAGTGCCACCATTTTTCCCG	cd03249, ABC_MTABC3_MDL1_MDL2, ATP-binding cassette domain of a mitochondrial protein MTABC3 and related proteins. MTABC3 (also known as ABCB6) is a mitochondrial ATP-binding cassette protein involved in iron homeostasis and one of four ABC transporters expressed in the mitochondrial inner membrane, the other three being MDL1(ABC7), MDL2, and ATM1. In fact, the yeast MDL1 (multidrug resistance-li…	KOG0055, KOG0055, KOG0055, Multidrug/pheromone exporter, ABC superfamily [Secondary metabolites biosynthesis, transport and catabolism]. 5.22518e-28	gi|168014352|ref|XP_001759716.1| ATP-binding cassette transporter, subfamily B, member 26, group MDR/PGP protein PpABCB26 [Physcomitrella patens] 4.5e-22	-	pfam00005, ABC_tran, ABC transporter. ABC transporters for a large family of proteins responsible for translocation of a variety of compounds across biological membranes. ABC transporters are the largest family of proteins in many completely sequenced bacteria. ABC transporters are composed of two copies of this domain and two copies of a transmembrane domain pfam00664. These four domains may bel…	sp|P08183|MDR1_HUMAN Multidrug resistance protein 1 OS=Homo sapiens GN=ABCB1 PE=1 SV=3 9.1592e-27	tr|A9S010|A9S010_PHYPA ATP-binding cassette transporter, subfamily B, member 26, group MDR/PGP protein PpABCB26 OS=Physcomitrella patens subsp. patens GN=ppabcb26 PE=4 SV=1 3.4e-22	GO:0000086, G2/M transition of mitotic cell cycle;GO:0002481, antigen processing and presentation of exogenous protein antigen via MHC class Ib, TAP-dependent;GO:0002485, antigen processing and presentation of endogenous peptide antigen via MHC class I via ER pathway, TAP-dependent;GO:0002489, antigen processing and presentation of endogenous peptide antigen via MHC class Ib via ER pathway, TAP-d…	-
TRINITY_DN19230_c0_g1	GAATCGGGGACGTCTTCACGATCGGCACCGAGGAGAACGTTCTCGCGGATGGTGCCTTGGTAGAGTGTTGGTTCTTGCGAGACGAGTGCGATGTAGGAGCGGTAGTCGTTAATGTTGAGACTAGAGATTTCTTTGCCGTCAACGTAGATTCCGCCAACTAGAGGGTCGTAGAAGCGTTCGAGAAGCTGGATTGTTGTCGATTTGCCGCAGCCGGATGCACCAACCAAGGCGATATATTGGCCTGGGGCGACGGTGAGGTTGAGACCACGGAGGACAGGTTGTTC	cd03249, ABC_MTABC3_MDL1_MDL2, ATP-binding cassette domain of a mitochondrial protein MTABC3 and related proteins. MTABC3 (also known as ABCB6) is a mitochondrial ATP-binding cassette protein involved in iron homeostasis and one of four ABC transporters expressed in the mitochondrial inner membrane, the other three being MDL1(ABC7), MDL2, and ATM1. In fact, the yeast MDL1 (multidrug resistance-li…	KOG0055, KOG0055, KOG0055, Multidrug/pheromone exporter, ABC superfamily [Secondary metabolites biosynthesis, transport and catabolism]. 3.14447e-26	gi|502143711|ref|XP_004505438.1| PREDICTED: putative multidrug resistance protein [Cicer arietinum] 3.6e-23	gi|597587172|ref|XM_007296581.1| Marssonina brunnea f. sp. 'multigermtubi' MB_m1 ABC transporter (MBM_08754), mRNA 5.74568e-51	pfam00005, ABC_tran, ABC transporter. ABC transporters for a large family of proteins responsible for translocation of a variety of compounds across biological membranes. ABC transporters are the largest family of proteins in many completely sequenced bacteria. ABC transporters are composed of two copies of this domain and two copies of a transmembrane domain pfam00664. These four domains may bel…	sp|P36619|PMD1_SCHPO Leptomycin B resistance protein pmd1 OS=Schizosaccharomyces pombe (strain 972 / ATCC 24843) GN=pmd1 PE=3 SV=2 2.97381e-35	tr|A0A022QTG6|A0A022QTG6_ERYGU Uncharacterized protein OS=Erythranthe guttata GN=MIMGU_mgv1a020311mg PE=4 SV=1 3.6e-23	GO:0005524, ATP binding;GO:0005773, vacuole;GO:0005886, plasma membrane;GO:0006855, drug transmembrane transport;GO:0016021, integral component of membrane;GO:0042626, ATPase activity, coupled to transmembrane movement of substances;GO:0046677, response to antibiotic	-
TRINITY_DN192272_c0_g1	AGGCGGAGGCCAGAAGAGAACAAAATTGACTCGTACACTGTGACTTGAGGAGAATGTATATCATTTTGCTCAACATATCCTGAAATTCGAGCAAATGTTTGTTGGTCTTTAGGGTGACCTGATATCCGTATATCTCCTTCAATATATCCTCCGGTCTTTCTACCAGCAAGAACGTCCATCAAAGTAGTCTTCCCCGCGCCGCTTGCACCAACTAATGCAGTAAGAACACCAGGTGAAAATACTCCACTAATTTTTGACAAGAGTTGCAACTTCGTTTCTCTTACACCTTGCGTCTTCATTTCCCTGGGCATATCAACAAAGTAATCAACATTATGGAAAGTCATTGTCAAAGGTTGAAATGGGAGGATCATTCCCTTCCTCTTAGGTCCAGACTCAGTA	PLN03140, PLN03140, ABC transporter G family member; Provisional. 2.76407e-62	KOG0065, KOG0065, KOG0065, Pleiotropic drug resistance proteins (PDR1-15), ABC superfamily [Secondary metabolites biosynthesis, transport and catabolism]. 2.14811e-53	gi|1021042387|gb|KZN00168.1| hypothetical protein DCAR_008922 [Daucus carota subsp. sativus] 1.3e-66	gi|743922873|ref|XM_011007212.1| PREDICTED: Populus euphratica ABC transporter G family member 31 (LOC105111760), transcript variant X2, mRNA 1.3437e-78	pfam00005, ABC_tran, ABC transporter. ABC transporters for a large family of proteins responsible for translocation of a variety of compounds across biological membranes. ABC transporters are the largest family of proteins in many completely sequenced bacteria. ABC transporters are composed of two copies of this domain and two copies of a transmembrane domain pfam00664. These four domains may bel…	sp|Q7PC88|AB31G_ARATH ABC transporter G family member 31 OS=Arabidopsis thaliana GN=ABCG31 PE=1 SV=1 2.67955e-70	tr|R0HML1|R0HML1_9BRAS Uncharacterized protein OS=Capsella rubella GN=CARUB_v10022508mg PE=3 SV=1 5.3e-57	GO:0005524, ATP binding;GO:0005886, plasma membrane;GO:0006810, transport;GO:0006855, drug transmembrane transport;GO:0009506, plasmodesma;GO:0016021, integral component of membrane;GO:0016887, ATPase activity;GO:0042626, ATPase activity, coupled to transmembrane movement of substances	-
TRINITY_DN189594_c0_g1	GGGAGAATCACAATCGACGGTCATGACATACGCGATGTAACGCTTAATTCCCTCCGGAATATCATGGGTATTGTGCCGCAGGACCCTCTTCTTTTCAATGACACTATATTGGAGAATTTACGTTATGCAAAGCCTTCCGCAACCAACGAGGAAATCTACGAAGCATGCCGAGCAGCGGCAATTCACCACAAGATTCTCGGGTTCGCAGACGGCTATGCCACTCGCGTTGGAGAGCAAGGCGTCAAGCTTTCAGGGGGTGAGATTCAG	cd03253, ABCC_ATM1_transporter, ATP-binding cassette domain of iron-sulfur clusters transporter, subfamily C. ATM1 is an ABC transporter that is expressed in the mitochondria. Although the specific function of ATM1 is unknown, its disruption results in the accumulation of excess mitochondrial iron, loss of mitochondrial cytochromes, oxidative damage to mitochondrial DNA, and decreased levels of c…	KOG0056, KOG0056, KOG0056, Heavy metal exporter HMT1, ABC superfamily [Inorganic ion transport and metabolism]. 1.66506e-38	gi|470120003|ref|XP_004296099.1| PREDICTED: ABC transporter B family member 25, mitochondrial [Fragaria vesca subsp. vesca] 1.6e-25	-	pfam00005, ABC_tran, ABC transporter. ABC transporters for a large family of proteins responsible for translocation of a variety of compounds across biological membranes. ABC transporters are the largest family of proteins in many completely sequenced bacteria. ABC transporters are composed of two copies of this domain and two copies of a transmembrane domain pfam00664. These four domains may bel…	sp|Q02592|HMT1_SCHPO Heavy metal tolerance protein OS=Schizosaccharomyces pombe (strain 972 / ATCC 24843) GN=hmt1 PE=2 SV=3 1.55874e-36	tr|B9T3V9|B9T3V9_RICCO Transporter ATM1, mitochondrial, putative OS=Ricinus communis GN=RCOM_0261010 PE=4 SV=1 1.0e-24	GO:0000329, fungal-type vacuole membrane;GO:0005524, ATP binding;GO:0005743, mitochondrial inner membrane;GO:0005773, vacuole;GO:0006879, cellular iron ion homeostasis;GO:0008559, xenobiotic transmembrane transporting ATPase activity;GO:0016021, integral component of membrane;GO:0036246, phytochelatin 2 import into vacuole;GO:0036249, cadmium ion import into vacuole;GO:0042626, ATPase activity, c…	-
TRINITY_DN188064_c0_g1	TCAACATATTGAGGCTTGACGATGGCCTTGAGGTCATCTTCGAGAATCTTTGTGAAATAATTCTGCAATTCAGAACCACGGAAATATTTGATCACATCTTGCCAGTCCGGTGGATTCTCATATCGACCCAAGTTGGGCTTCAATTTCCCGCTGAGAATCTTCAAAGCAGTACTCTTTCCAATACCGTTGGAGCCTACCAGTCCCAGAACCTGACCGGGGCGAGGTGTGGGCAGCCGATGAAGCTTGAAGCTGTTGGCAGAGTATCGATGGGTAACATGAGACTCGAGATTGGTTG	cd03236, ABC_RNaseL_inhibitor_domain1, The ATP-binding cassette domain 1 of RNase L inhibitor. The ABC ATPase, RNase L inhibitor (RLI), is a key enzyme in ribosomal biogenesis, formation of translation preinitiation complexes, and assembly of HIV capsids. RLI s are not transport proteins and thus cluster with a group of soluble proteins that lack the transmembrane components commonly found in oth…	KOG0063, KOG0063, KOG0063, RNAse L inhibitor, ABC superfamily [RNA processing and modification]. 1.67122e-58	gi|743756619|ref|XP_010917851.1| PREDICTED: ABC transporter E family member 2 [Elaeis guineensis] 7.9e-42	gi|1022641718|ref|XM_016372971.1| Exophiala mesophila translation initiation factor RLI1 mRNA 2.15708e-50	pfam00005, ABC_tran, ABC transporter. ABC transporters for a large family of proteins responsible for translocation of a variety of compounds across biological membranes. ABC transporters are the largest family of proteins in many completely sequenced bacteria. ABC transporters are composed of two copies of this domain and two copies of a transmembrane domain pfam00664. These four domains may bel…	sp|G0SEV9|RLI1_CHATD Translation initiation factor RLI1 OS=Chaetomium thermophilum (strain DSM 1495 / CBS 144.50 / IMI 039719) GN=RLI1 PE=3 SV=2 2.34671e-58	tr|T2DN90|T2DN90_PHAVU ABC transporter E family member 2-like protein OS=Phaseolus vulgaris PE=2 SV=1 1.0e-41	GO:0003743, translation initiation factor activity;GO:0005524, ATP binding;GO:0005634, nucleus;GO:0005737, cytoplasm;GO:0006364, rRNA processing;GO:0006810, transport;GO:0016887, ATPase activity;GO:0046872, metal ion binding;GO:0051539, 4 iron, 4 sulfur cluster binding	-
TRINITY_DN186736_c0_g1	GACGCTTCCAACCCACGCTATAAATTCCCAAGCAACAAATACAATTCCCATGCTACCTATTAATAATCCTTTATCTAATCCTTGCTTTATACCAATGTCTGTGCTTTTCTGAAGTTCATGCCCAAATCTGTCTAATGTTTGGTGTTCGCCCACGTAGGAATAAACAGTTCGAATAGATGAGATTGCCTGTTCTGCAACTCCACCTGCTACCCCATAAGCCTCCCTCGTCTTCATAGCAAAA	pfam00664, ABC_membrane, ABC transporter transmembrane region. This family represents a unit of six transmembrane helices. Many members of the ABC transporter family (pfam00005) have two such regions. 8.1438e-06	KOG0055, KOG0055, KOG0055, Multidrug/pheromone exporter, ABC superfamily [Secondary metabolites biosynthesis, transport and catabolism]. 4.23551e-15	gi|1021028296|gb|KZM86083.1| hypothetical protein DCAR_026495 [Daucus carota subsp. sativus] 3.2e-33	-	pfam00664, ABC_membrane, ABC transporter transmembrane region. This family represents a unit of six transmembrane helices. Many members of the ABC transporter family (pfam00005) have two such regions. 1.94562e-06	sp|Q9LHD1|AB15B_ARATH ABC transporter B family member 15 OS=Arabidopsis thaliana GN=ABCB15 PE=3 SV=1 1.01766e-21	tr|A0A067JVB0|A0A067JVB0_JATCU Uncharacterized protein OS=Jatropha curcas GN=JCGZ_17871 PE=4 SV=1 6.5e-26	GO:0005524, ATP binding;GO:0005886, plasma membrane;GO:0016021, integral component of membrane;GO:0042626, ATPase activity, coupled to transmembrane movement of substances;GO:0055085, transmembrane transport	-
TRINITY_DN18398_c0_g1	GCAGTTGGTCTTAGTGTTTCATTCGCCATTGAATGGAGATTGGCTATTATGGCAGCTCTTGTCACTCCATTTACACTTGGAGCTAGTTACTTCAGCTTGATCATTAATGTTGGTCCCAAAATGGACAACGGTTCTTATGCCAAAGCCAGCAATATAGCTTCAGGTGCAGTCTCTAATATAAGGACAGTTGCAACATTTTCAACACAACAACAGATAGTGCAGTCCTTTGATCGAGCTTTATCCGAACCACAAAAAAAATCAGTTAAAAGGTCACAAATACTTGGAGTAGCCTTGGGGTTTTCACAAGGTGCGATGTATGCAGCTTACACTCTAACCCTCTGGTTTGGTGCTTATTTAGTAAACAAAGATCTTGCCAATTTTGGAGAAGTATATAAAATC…	cd03249, ABC_MTABC3_MDL1_MDL2, ATP-binding cassette domain of a mitochondrial protein MTABC3 and related proteins. MTABC3 (also known as ABCB6) is a mitochondrial ATP-binding cassette protein involved in iron homeostasis and one of four ABC transporters expressed in the mitochondrial inner membrane, the other three being MDL1(ABC7), MDL2, and ATM1. In fact, the yeast MDL1 (multidrug resistance-li…	KOG0055, KOG0055, KOG0055, Multidrug/pheromone exporter, ABC superfamily [Secondary metabolites biosynthesis, transport and catabolism]. 4.63469e-59	gi|1021032191|gb|KZM89975.1| hypothetical protein DCAR_022660 [Daucus carota subsp. sativus] 1.4e-161	gi|731401728|ref|XM_010656098.1| PREDICTED: Vitis vinifera ABC transporter B family member 19-like (LOC100246339), mRNA 4.92664e-151	pfam00664, ABC_membrane, ABC transporter transmembrane region. This family represents a unit of six transmembrane helices. Many members of the ABC transporter family (pfam00005) have two such regions. 1.04024e-16	sp|Q9LJX0|AB19B_ARATH ABC transporter B family member 19 OS=Arabidopsis thaliana GN=ABCB19 PE=1 SV=1 6.92263e-78	tr|K4BN05|K4BN05_SOLLC Uncharacterized protein OS=Solanum lycopersicum PE=4 SV=1 1.4e-137	GO:0005524, ATP binding;GO:0005886, plasma membrane;GO:0008361, regulation of cell size;GO:0009637, response to blue light;GO:0009639, response to red or far red light;GO:0009640, photomorphogenesis;GO:0009733, response to auxin;GO:0009734, auxin-activated signaling pathway;GO:0009926, auxin polar transport;GO:0009958, positive gravitropism;GO:0010160, formation of animal organ boundary;GO:001021…	K05658-ko04976 Bile secretion;ko02010 ABC transporters
TRINITY_DN182097_c0_g1	GTCGGAAGCTGGATGACATTGATGGCGACGTTGAACTAAGAGATGTCTACTTTAGTTATCCATCAAGGCCAAATGAGCTAATTTTTAAAGGACTTCACCTCACAGTACCGAGTGGAACAACTACAGCTCTAGTAGGATGTAGCGGAAGTGGAAAATCAACAGTGATCAGTCTAATAGAGAGGTTTTATGATCCACAAGCAGGTGAAATTCTTATAGACCATATTAATCTCAAAGATTTTCAGCTCAGATGGATCAGAGGCAAAATAGGTCTTGTTAGCCAGGAACCAG	cd03249, ABC_MTABC3_MDL1_MDL2, ATP-binding cassette domain of a mitochondrial protein MTABC3 and related proteins. MTABC3 (also known as ABCB6) is a mitochondrial ATP-binding cassette protein involved in iron homeostasis and one of four ABC transporters expressed in the mitochondrial inner membrane, the other three being MDL1(ABC7), MDL2, and ATM1. In fact, the yeast MDL1 (multidrug resistance-li…	KOG0055, KOG0055, KOG0055, Multidrug/pheromone exporter, ABC superfamily [Secondary metabolites biosynthesis, transport and catabolism]. 1.60885e-34	gi|1021025064|gb|KZM82852.1| hypothetical protein DCAR_030421 [Daucus carota subsp. sativus] 1.2e-45	gi|297817555|ref|XM_002876615.1| Arabidopsis lyrata subsp. lyrata P-glycoprotein 21 (PGP21), mRNA 4.67494e-27	pfam00005, ABC_tran, ABC transporter. ABC transporters for a large family of proteins responsible for translocation of a variety of compounds across biological membranes. ABC transporters are the largest family of proteins in many completely sequenced bacteria. ABC transporters are composed of two copies of this domain and two copies of a transmembrane domain pfam00664. These four domains may bel…	sp|O80725|AB4B_ARATH ABC transporter B family member 4 OS=Arabidopsis thaliana GN=ABCB4 PE=1 SV=1 4.66888e-45	tr|F6HE44|F6HE44_VITVI Putative uncharacterized protein OS=Vitis vinifera GN=VIT_05s0020g00890 PE=4 SV=1 1.5e-40	GO:0005524, ATP binding;GO:0005886, plasma membrane;GO:0008559, xenobiotic transmembrane transporting ATPase activity;GO:0009506, plasmodesma;GO:0009630, gravitropism;GO:0009733, response to auxin;GO:0009734, auxin-activated signaling pathway;GO:0009735, response to cytokinin;GO:0009926, auxin polar transport;GO:0010315, auxin efflux;GO:0010328, auxin influx transmembrane transporter activity;GO:…	-
TRINITY_DN181832_c0_g1	GCCCTCTGGAAATGCCTGTATCTTGTCGTGAATCGAAGCAGCTTTGCAAGCAGCAAACACGTCCTCATCACTTGCGTCTTGATTGGCATACTTAAGGTTATACATAAGAGTTTCGTTGAAAAGAACGGTGTCTTGAGGAACGACACCTATATGGCGTCGGACAGAGTCAATCGTGATATCCCTAACGTCGTTTCCATCGATTTGTATACTTCCATCCTGTGTGTTGTAGAACCGAAAAAGAAGCCTGAACACGGTAGACTTTCCTCCTCCAGATTCGCCTACAAACGCAGTAGTAGTGCCCGGGCGGCAATTGAAGCTCAAACCCTCAAGTGCTGGCTTGCGCTTGTCGTAGGAGAATTTGACA	cd03253, ABCC_ATM1_transporter, ATP-binding cassette domain of iron-sulfur clusters transporter, subfamily C. ATM1 is an ABC transporter that is expressed in the mitochondria. Although the specific function of ATM1 is unknown, its disruption results in the accumulation of excess mitochondrial iron, loss of mitochondrial cytochromes, oxidative damage to mitochondrial DNA, and decreased levels of c…	KOG0056, KOG0056, KOG0056, Heavy metal exporter HMT1, ABC superfamily [Inorganic ion transport and metabolism]. 2.77957e-47	gi|971508888|dbj|GAQ89311.1| ABC transporter ATP-binding protein [Klebsormidium flaccidum] 4.2e-32	-	pfam00005, ABC_tran, ABC transporter. ABC transporters for a large family of proteins responsible for translocation of a variety of compounds across biological membranes. ABC transporters are the largest family of proteins in many completely sequenced bacteria. ABC transporters are composed of two copies of this domain and two copies of a transmembrane domain pfam00664. These four domains may bel…	sp|Q02592|HMT1_SCHPO Heavy metal tolerance protein OS=Schizosaccharomyces pombe (strain 972 / ATCC 24843) GN=hmt1 PE=2 SV=3 1.6108e-43	tr|A0A067LMM6|A0A067LMM6_JATCU Uncharacterized protein OS=Jatropha curcas GN=JCGZ_17276 PE=4 SV=1 3.2e-32	GO:0000329, fungal-type vacuole membrane;GO:0005524, ATP binding;GO:0005743, mitochondrial inner membrane;GO:0005773, vacuole;GO:0006879, cellular iron ion homeostasis;GO:0016021, integral component of membrane;GO:0036246, phytochelatin 2 import into vacuole;GO:0036249, cadmium ion import into vacuole;GO:0042626, ATPase activity, coupled to transmembrane movement of substances;GO:0044604, phytoch…	-
TRINITY_DN181606_c0_g1	TTCCAATTTCTCCTCGCGCTACAAGCTTGACACCATAGTAGAGGCAAAGTGCGTATGCGCAGTACATCGCAAAGAACATGTTTCCATAAATCAAGGCCATCAATGGCCCGAGCCTTAGGGAGTACTTCTTCGCATGCTTGGTATGGACATTGAATCTTTGCAGAATCTTATCCTTGGCTCCTAAAGCAGTAACATTGAGGATGCTACTGAGTGCTTCTTCGGCAACACCTGCTGCCTGGGACAGAGCCGCGTTCAGTTTACCTTCTGCAGCGGCGTTGAGACCCCCGAAGAACCCAGTTGAGACTACTATGTAAGGGACCGCGGTGCCCGTCGCCAGAGTCAGCTTCCAGTTTTTGGTAAACGCGATGACGAAAGCGGTGGTGATCATGGAGGCG	pfam00664, ABC_membrane, ABC transporter transmembrane region. This family represents a unit of six transmembrane helices. Many members of the ABC transporter family (pfam00005) have two such regions. 1.21745e-06	KOG0055, KOG0055, KOG0055, Multidrug/pheromone exporter, ABC superfamily [Secondary metabolites biosynthesis, transport and catabolism]. 7.2636e-10	gi|565440945|ref|XP_006283011.1| hypothetical protein CARUB_v10004001mg [Capsella rubella] 7.2e-06	-	pfam00664, ABC_membrane, ABC transporter transmembrane region. This family represents a unit of six transmembrane helices. Many members of the ABC transporter family (pfam00005) have two such regions. 2.90858e-07	sp|B5X0E4|ABCB5_MOUSE ATP-binding cassette sub-family B member 5 OS=Mus musculus GN=Abcb5 PE=2 SV=1 3.04467e-13	tr|R0GGK4|R0GGK4_9BRAS Uncharacterized protein OS=Capsella rubella GN=CARUB_v10004001mg PE=4 SV=1 5.5e-06	GO:0002481, antigen processing and presentation of exogenous protein antigen via MHC class Ib, TAP-dependent;GO:0002485, antigen processing and presentation of endogenous peptide antigen via MHC class I via ER pathway, TAP-dependent;GO:0002489, antigen processing and presentation of endogenous peptide antigen via MHC class Ib via ER pathway, TAP-dependent;GO:0002591, positive regulation of antige…	-
TRINITY_DN179838_c0_g1	AACCGGGTACTCTCACTGCTTTAATGGGTGTTTCGGGCGCGGGTAAGACTACACTGCTTGATGTCCTCGCGCAACGAGTGTCTATGGGAGTCGTTACTGGTGATATGCTTGTCTCGGGAAAACCACTCGATGAGTCTTTTCAACGCAAGACAGGCTATGTTCAGCAACAGGATCTCCACTTGGAAACCACGACTGTCCGCGAGGCACTTCGCTTTTCAGCCATGCTCCG	cd03232, ABCG_PDR_domain2, Second domain of the pleiotropic drug resistance-like (PDR) subfamily G of ATP-binding cassette transporters. The pleiotropic drug resistance (PDR) is a well-described phenomenon occurring in fungi and shares several similarities with processes in bacteria and higher eukaryotes. This PDR subfamily represents domain I of its (ABC-IM)2 organization. ABC transporters are a…	KOG0065, KOG0065, KOG0065, Pleiotropic drug resistance proteins (PDR1-15), ABC superfamily [Secondary metabolites biosynthesis, transport and catabolism]. 1.22356e-26	gi|760448937|ref|XP_011401537.1| Pleiotropic drug resistance protein 15 [Auxenochlorella protothecoides] 2.6e-16	-	pfam00005, ABC_tran, ABC transporter. ABC transporters for a large family of proteins responsible for translocation of a variety of compounds across biological membranes. ABC transporters are the largest family of proteins in many completely sequenced bacteria. ABC transporters are composed of two copies of this domain and two copies of a transmembrane domain pfam00664. These four domains may bel…	sp|P41820|BFR1_SCHPO Brefeldin A resistance protein OS=Schizosaccharomyces pombe (strain 972 / ATCC 24843) GN=bfr1 PE=1 SV=1 4.30791e-33	tr|A0A087SS13|A0A087SS13_AUXPR Pleiotropic drug resistance protein 15 OS=Auxenochlorella protothecoides GN=F751_0791 PE=3 SV=1 2.0e-16	GO:0005524, ATP binding;GO:0005886, plasma membrane;GO:0008559, xenobiotic transmembrane transporting ATPase activity;GO:0016021, integral component of membrane;GO:0016887, ATPase activity;GO:0035690, cellular response to drug;GO:0046618, drug export;GO:0046677, response to antibiotic;GO:0055085, transmembrane transport	-
TRINITY_DN179828_c0_g1	GCCCTTCGGGTTGCGGCAAATCGACCTTGATGAATTGCATTGCCGGCCTGGAAAACATCACCGGTGGCGCGATCATGATCGGCGACCAGGACGTCAGCGGCATGAGCCCCAAGGATCGTGACATCGCCATGGTGTTCCAGTCCTACGCGCTGTACCCGACCATGAGCGTGCGCGAGAACATCGAATTCGGCCTGAAGATTCGCAAGATGCCCCAGGCGGCGATCGATGAAGAAGTGGCGCGAGTGGCCAAGCTGCTGCAGATCGAGCACCTGCTCAATCGCAAGCCGGGCCAGCTCTCCGGTGGCCAGCAACAACGTGTGGCCATGGGCCGGGCACTGGCGCGTCGCCCGAAGATCTA	cd03301, ABC_MalK_N, The N-terminal ATPase domain of the maltose transporter, MalK. ATP binding cassette (ABC) proteins function from bacteria to human, mediating the translocation of substances into and out of cells or organelles. ABC transporters contain two transmembrane-spanning domains (TMDs) or subunits and two nucleotide binding domains (NBDs) or subunits that couple transport to the hydro…	KOG0058, KOG0058, KOG0058, Peptide exporter, ABC superfamily [Intracellular trafficking, secretion, and vesicular transport]. 2.12556e-14	gi|870747888|gb|KMS64538.1| hypothetical protein BVRB_019260, partial [Beta vulgaris subsp. vulgaris] 1.9e-34	gi|1015851075|gb|CP012400.1| Pseudomonas fluorescens strain LBUM636, complete genome 1.05051e-168	pfam00005, ABC_tran, ABC transporter. ABC transporters for a large family of proteins responsible for translocation of a variety of compounds across biological membranes. ABC transporters are the largest family of proteins in many completely sequenced bacteria. ABC transporters are composed of two copies of this domain and two copies of a transmembrane domain pfam00664. These four domains may bel…	sp|Q8UB29|UGPC3_AGRFC sn-glycerol-3-phosphate import ATP-binding protein UgpC 3 OS=Agrobacterium fabrum (strain C58 / ATCC 33970) GN=ugpC3 PE=3 SV=1 4.12177e-47	tr|A0A0J7YN42|A0A0J7YN42_BETVU Uncharacterized protein (Fragment) OS=Beta vulgaris subsp. vulgaris GN=BVRB_019260 PE=4 SV=1 1.5e-34	GO:0001407, glycerophosphodiester transmembrane transport;GO:0005524, ATP binding;GO:0008643, carbohydrate transport;GO:0015430, glycerol-3-phosphate-transporting ATPase activity;GO:0043190, ATP-binding cassette (ABC) transporter complex	-
TRINITY_DN173954_c0_g1	AGACAGTTGCTTTAGTTGGAGGAAGTGGAAGTGGGAAATCAACTGTTATTGCACTTCTGGAAAGATTTTATGATCCAAACTCAGGTAACATCACACTTGATGGGGTCGAGATACGAACTTTACAAGTGAAGTGGTTAAGACAACAGATGGGGCTTGTAAGCCAAGAACCAGCCTTGTTCAATGATACAATTAGAAGCAACATTGCTT	cd03249, ABC_MTABC3_MDL1_MDL2, ATP-binding cassette domain of a mitochondrial protein MTABC3 and related proteins. MTABC3 (also known as ABCB6) is a mitochondrial ATP-binding cassette protein involved in iron homeostasis and one of four ABC transporters expressed in the mitochondrial inner membrane, the other three being MDL1(ABC7), MDL2, and ATM1. In fact, the yeast MDL1 (multidrug resistance-li…	KOG0055, KOG0055, KOG0055, Multidrug/pheromone exporter, ABC superfamily [Secondary metabolites biosynthesis, transport and catabolism]. 2.37479e-30	gi|1021045762|gb|KZN03543.1| hypothetical protein DCAR_012299 [Daucus carota subsp. sativus] 1.9e-29	gi|703107429|ref|XM_010100442.1| Morus notabilis ABC transporter B family member 11 partial mRNA 4.09738e-31	pfam00005, ABC_tran, ABC transporter. ABC transporters for a large family of proteins responsible for translocation of a variety of compounds across biological membranes. ABC transporters are the largest family of proteins in many completely sequenced bacteria. ABC transporters are composed of two copies of this domain and two copies of a transmembrane domain pfam00664. These four domains may bel…	sp|Q9M1Q9|AB21B_ARATH ABC transporter B family member 21 OS=Arabidopsis thaliana GN=ABCB21 PE=1 SV=2 3.18708e-33	tr|G7IBR3|G7IBR3_MEDTR ABC transporter B family protein OS=Medicago truncatula GN=MTR_1g086150 PE=4 SV=2 8.6e-27	GO:0005524, ATP binding;GO:0010540, basipetal auxin transport;GO:0016021, integral component of membrane;GO:0042626, ATPase activity, coupled to transmembrane movement of substances	-
TRINITY_DN170560_c0_g1	AAGAAGCCGTCCCGTTCGCGCGGCAAGCTTGAGCTGCGGAACATCAAGTTCGAGTATCCGACGCGTCCCGGACAGACCGTTCTCCGCGACTTCAGCCTCCGCATCGACGCTGGAACGACGATGGCGATTGTGGGGCCGTCGGGCTCGGGCAAGTCCACGATCGTCGGCCTCGTGGAGCGGTTCTACGACCCGCAGGAGGGCGAGGTTCACTTCGACGGCATAAATATCAAG	cd03249, ABC_MTABC3_MDL1_MDL2, ATP-binding cassette domain of a mitochondrial protein MTABC3 and related proteins. MTABC3 (also known as ABCB6) is a mitochondrial ATP-binding cassette protein involved in iron homeostasis and one of four ABC transporters expressed in the mitochondrial inner membrane, the other three being MDL1(ABC7), MDL2, and ATM1. In fact, the yeast MDL1 (multidrug resistance-li…	KOG0055, KOG0055, KOG0055, Multidrug/pheromone exporter, ABC superfamily [Secondary metabolites biosynthesis, transport and catabolism]. 3.35464e-25	gi|700202854|gb|KGN57987.1| hypothetical protein Csa_3G418780 [Cucumis sativus] 4.7e-21	-	pfam00005, ABC_tran, ABC transporter. ABC transporters for a large family of proteins responsible for translocation of a variety of compounds across biological membranes. ABC transporters are the largest family of proteins in many completely sequenced bacteria. ABC transporters are composed of two copies of this domain and two copies of a transmembrane domain pfam00664. These four domains may bel…	sp|Q9M1Q9|AB21B_ARATH ABC transporter B family member 21 OS=Arabidopsis thaliana GN=ABCB21 PE=1 SV=2 1.10998e-25	tr|A0A0A0LBG3|A0A0A0LBG3_CUCSA Uncharacterized protein OS=Cucumis sativus GN=Csa_3G418780 PE=4 SV=1 3.6e-21	GO:0005524, ATP binding;GO:0010540, basipetal auxin transport;GO:0016021, integral component of membrane;GO:0042626, ATPase activity, coupled to transmembrane movement of substances	-
TRINITY_DN169643_c0_g1	GGCAGTGTCTTGGTAAAAGCTTTGTCTTTCTCCATGAAACGTGGCGATCACGTTCTGGTAGTCGGACCAAACGGATGTGGAAAGTCCTCACTCTTCCGTATTCTCGGTGGCCTCTGGCCGGTTTATGGCGGCACAGTCCGCAAACCTCCGCTCTCGCAAGTCTTCTACGTCCCTCAACGACCCTACCTCAGTGCCGGTTCTCTTCGCCAGCAAATCATCTAC	TIGR00954, Peroxisomal_long-chain_fatty_acid_import_protein_1, Peroxysomal Fatty Acyl CoA Transporter (FAT) Family protei. [Transport and binding proteins, Carbohydrates, organic alcohols, and acids]. 2.90538e-29	KOG0064, KOG0064, KOG0064, Peroxisomal long-chain acyl-CoA transporter, ABC superfamily [Lipid transport and metabolism]. 2.09398e-31	gi|694452438|ref|XP_009351166.1| PREDICTED: uncharacterized protein LOC103942705 [Pyrus x bretschneideri] 7.2e-19	-	pfam00005, ABC_tran, ABC transporter. ABC transporters for a large family of proteins responsible for translocation of a variety of compounds across biological membranes. ABC transporters are the largest family of proteins in many completely sequenced bacteria. ABC transporters are composed of two copies of this domain and two copies of a transmembrane domain pfam00664. These four domains may bel…	sp|Q9UBJ2|ABCD2_HUMAN ATP-binding cassette sub-family D member 2 OS=Homo sapiens GN=ABCD2 PE=1 SV=1 2.09545e-29	tr|E1ZGQ0|E1ZGQ0_CHLVA Putative uncharacterized protein OS=Chlorella variabilis GN=CHLNCDRAFT_35761 PE=4 SV=1 7.2e-19	GO:0000038, very long-chain fatty acid metabolic process;GO:0005324, long-chain fatty acid transporter activity;GO:0005524, ATP binding;GO:0005777, peroxisome;GO:0005778, peroxisomal membrane;GO:0005779, integral component of peroxisomal membrane;GO:0005829, cytosol;GO:0006635, fatty acid beta-oxidation;GO:0016021, integral component of membrane;GO:0032000, positive regulation of fatty acid beta-…	-
TRINITY_DN169542_c0_g1	GGCACTGGTGCGGCTAGTCGTCTTTTTGAGCTGCAAGACCGCCAACCAACCTTGCCTCCTACAAAGGGCGAGCCCGTCAGGTCCGCTCGCGGGCCGATCGAGTTCAAGCATGTAACCTTTAGCTACCCCACCCGCCCAGCTGTCACCATCTTCAAGGATCTATCGTTCCGAATTAACCAAGGCACGAATGTTGCCATTGTTGCACCCAGTGGAGCTGGTAAATCGACCGTGGCAAGCCTGCTTCTTCGATTCTATGTTCCAACAGCGGGAACCATCACCATTGATGGGCGCGACATTACGAAGCTGAACG	COG1132, MdlB, ABC-type multidrug transport system, ATPase and permease components [Defense mechanisms]. 5.13295e-25	KOG0058, KOG0058, KOG0058, Peptide exporter, ABC superfamily [Intracellular trafficking, secretion, and vesicular transport]. 7.38719e-31	gi|357485125|ref|XP_003612850.1| ABC transporter B family-like protein [Medicago truncatula] 2.5e-22	-	pfam00005, ABC_tran, ABC transporter. ABC transporters for a large family of proteins responsible for translocation of a variety of compounds across biological membranes. ABC transporters are the largest family of proteins in many completely sequenced bacteria. ABC transporters are composed of two copies of this domain and two copies of a transmembrane domain pfam00664. These four domains may bel…	sp|P33311|MDL2_YEAST ATP-dependent permease MDL2, mitochondrial OS=Saccharomyces cerevisiae (strain ATCC 204508 / S288c) GN=MDL2 PE=1 SV=3 7.50838e-39	tr|A0A0C9RIA8|A0A0C9RIA8_9SPER TSA: Wollemia nobilis Ref_Wollemi_Transcript_18635_3947 transcribed RNA sequence OS=Wollemia nobilis PE=4 SV=1 1.8e-23	GO:0005524, ATP binding;GO:0005743, mitochondrial inner membrane;GO:0015421, oligopeptide-transporting ATPase activity;GO:0016021, integral component of membrane;GO:0042626, ATPase activity, coupled to transmembrane movement of substances;GO:0055085, transmembrane transport;GO:0070301, cellular response to hydrogen peroxide;GO:0090374, oligopeptide export from mitochondrion	-
TRINITY_DN169031_c0_g1	GCTGCATAGAATTAAAGAATGTGTTCTTTGCATATCCATCAAGGCCTGAACAACTGATTTTTCAAGGCTTAAGTCTCACAATAGAAGCTGGAAAAACATTGGCGCTTGTTGGACAAAGTGGTTCAGGAAAATCAACCGTCATTGGCTTGGTTGAGAGATTCTACGACCCTTTGAAGGGATCAATACTAATTGACGAACAAGACATCAAGAGCTACAATTTACGAAGTTTAAGGTCGCATATTGCATTGGTGAGCCAAGAACCTACTCTTTTTGCAGGCG	cd03249, ABC_MTABC3_MDL1_MDL2, ATP-binding cassette domain of a mitochondrial protein MTABC3 and related proteins. MTABC3 (also known as ABCB6) is a mitochondrial ATP-binding cassette protein involved in iron homeostasis and one of four ABC transporters expressed in the mitochondrial inner membrane, the other three being MDL1(ABC7), MDL2, and ATM1. In fact, the yeast MDL1 (multidrug resistance-li…	KOG0055, KOG0055, KOG0055, Multidrug/pheromone exporter, ABC superfamily [Secondary metabolites biosynthesis, transport and catabolism]. 1.04163e-32	gi|747079016|ref|XP_011086691.1| PREDICTED: putative multidrug resistance protein [Sesamum indicum] 5.0e-38	-	pfam00005, ABC_tran, ABC transporter. ABC transporters for a large family of proteins responsible for translocation of a variety of compounds across biological membranes. ABC transporters are the largest family of proteins in many completely sequenced bacteria. ABC transporters are composed of two copies of this domain and two copies of a transmembrane domain pfam00664. These four domains may bel…	sp|Q6YUU5|MDR_ORYSJ Putative multidrug resistance protein OS=Oryza sativa subsp. japonica GN=Os02g0190300 PE=3 SV=1 1.59363e-38	tr|A0A103YAQ8|A0A103YAQ8_CYNCS AAA+ ATPase domain-containing protein OS=Cynara cardunculus var. scolymus GN=Ccrd_015994 PE=4 SV=1 1.5e-37	GO:0005524, ATP binding;GO:0016021, integral component of membrane;GO:0042626, ATPase activity, coupled to transmembrane movement of substances;GO:0055085, transmembrane transport	-
TRINITY_DN167502_c0_g1	AACAGCCTCAGCTTCTCGGTTGATGGCGGCCAAAAAATCGGGATTGTTGGGCGGACGGGAAGTGGCAAAAGCTCATCCACTCTTGCTATTCTGCGCTTAATTAACATAGTATCTGGGAGAATTGTCTTGGATGATATCGATCTGGCAGATTTGCCGGGCTCTGTTGTAAGAGAGCGATTGATTTGCCTGACGCAGGACCCATTCCTATTTCCCGCATCTGTGCGATCCA	cd03288, ABCC_SUR2, ATP-binding cassette domain 2 of the sulfonylurea receptor SUR. The SUR domain 2. The sulfonylurea receptor SUR is an ATP binding cassette (ABC) protein of the ABCC/MRP family. Unlike other ABC proteins, it has no intrinsic transport function, neither active nor passive, but associates with the potassium channel proteins Kir6.1 or Kir6.2 to form the ATP-sensitive potassium (K(…	KOG0054, KOG0054, KOG0054, Multidrug resistance-associated protein/mitoxantrone resistance protein, ABC superfamily [Secondary metabolites biosynthesis, transport and catabolism]. 4.34894e-16	gi|971516611|dbj|GAQ81618.1| ABC transporter G family member 40 [Klebsormidium flaccidum] 3.9e-12	-	pfam00005, ABC_tran, ABC transporter. ABC transporters for a large family of proteins responsible for translocation of a variety of compounds across biological membranes. ABC transporters are the largest family of proteins in many completely sequenced bacteria. ABC transporters are composed of two copies of this domain and two copies of a transmembrane domain pfam00664. These four domains may bel…	sp|P70170|ABCC9_MOUSE ATP-binding cassette sub-family C member 9 OS=Mus musculus GN=Abcc9 PE=1 SV=2 1.53032e-18	tr|K8F079|K8F079_9CHLO ATP-binding cassette superfamily OS=Bathycoccus prasinos GN=Bathy02g04150 PE=4 SV=1 3.9e-12	GO:0005524, ATP binding;GO:0005886, plasma membrane;GO:0008076, voltage-gated potassium channel complex;GO:0008281, sulfonylurea receptor activity;GO:0016021, integral component of membrane;GO:0030017, sarcomere;GO:0042383, sarcolemma;GO:0042626, ATPase activity, coupled to transmembrane movement of substances;GO:0044325, ion channel binding;GO:0051607, defense response to virus;GO:0071805, potas…	-
TRINITY_DN166227_c0_g1	GGCGGACTGTGCGCGGGCACGGTCGACACCGGGCACCAAGCGCAGGAAGCGCAGCACCGAGAGGGGCAAGGTCGGGTCCACATGCAGCTTCTGCGGCATGTAGCCGACCCGCAGCCTCGGCTTGCGCCACACGCTGCCGCTGTCGGGCTTGAGCAGGCCGAGCACGGCGCGCACCAGGGTGGTCTTGCCGGCACCGTTGGGGCCGATCAGCGTGACGATCTGACCTGGCTCGACGCTCAGGGCGATGTTGTCCAGCAC	PRK09544, znuC, high-affinity zinc transporter ATPase; Reviewed. 5.1316e-29	KOG0056, KOG0056, KOG0056, Heavy metal exporter HMT1, ABC superfamily [Inorganic ion transport and metabolism]. 1.29589e-08	gi|971518813|dbj|GAQ79361.1| ABC transporter ATP-binding protein [Klebsormidium flaccidum] 3.2e-10	gi|1015851075|gb|CP012400.1| Pseudomonas fluorescens strain LBUM636, complete genome 2.23263e-99	pfam00005, ABC_tran, ABC transporter. ABC transporters for a large family of proteins responsible for translocation of a variety of compounds across biological membranes. ABC transporters are the largest family of proteins in many completely sequenced bacteria. ABC transporters are composed of two copies of this domain and two copies of a transmembrane domain pfam00664. These four domains may bel…	sp|Q3KKA1|ZNUC_PSEPF Zinc import ATP-binding protein ZnuC OS=Pseudomonas fluorescens (strain Pf0-1) GN=znuC PE=3 SV=1 2.26536e-50	tr|E1ZGT6|E1ZGT6_CHLVA Putative uncharacterized protein OS=Chlorella variabilis GN=CHLNCDRAFT_31463 PE=4 SV=1 3.0e-08	GO:0005524, ATP binding;GO:0015633, zinc-transporting ATPase activity;GO:0016887, ATPase activity;GO:0043190, ATP-binding cassette (ABC) transporter complex	-
TRINITY_DN165367_c0_g1	TGGTAATATACAATCTACAGACGACCAGTGAAGTAAACTACTCTGAGTGCCTGGGCTGCATTGGGCCAGTCTCCACAAGTCTACCTGCGTCCAGTTGGATAACAACATCGGCATTTCGAAGGGTTTCGACATGATGCGCAATCATGAGTACCGTGCAGTCAGCAAAGGTCTCCTCCATGATCTTCATTATCCGCTTTTCTGTCTCTTGGTCCATGTCGCTGGTCGCTTCATCGACCAGAATGAGCCTGCCCCCTGTTATCTTATGGTGGAGAATGGCACGCGCGAGGTAAAACAGTTGCTTCTGGCCATGCGAAAGGTGGATGACTTCCAGATCCGCATCTAAGCCGCCGGCACGCTGGATAGTTTCCCAAAGACCCACTTTCGAGAGTGTGTCGATCA…	cd03244, ABCC_MRP_domain2, ATP-binding cassette domain 2 of multidrug resistance-associated protein. The ABC subfamily C is also known as MRP (multidrug resistance-associated protein). Some of the MRP members have five additional transmembrane segments in their N-terminus, but the function of these additional membrane-spanning domains is not clear. The MRP was found in the multidrug-resistance lu…	KOG0054, KOG0054, KOG0054, Multidrug resistance-associated protein/mitoxantrone resistance protein, ABC superfamily [Secondary metabolites biosynthesis, transport and catabolism]. 7.19915e-42	gi|693500570|emb|CEF96943.1| ABC transporter, conserved site [Ostreococcus tauri] 5.1e-35	-	pfam00005, ABC_tran, ABC transporter. ABC transporters for a large family of proteins responsible for translocation of a variety of compounds across biological membranes. ABC transporters are the largest family of proteins in many completely sequenced bacteria. ABC transporters are composed of two copies of this domain and two copies of a transmembrane domain pfam00664. These four domains may bel…	sp|P82451|ABCC9_RABIT ATP-binding cassette sub-family C member 9 OS=Oryctolagus cuniculus GN=ABCC9 PE=2 SV=1 3.82052e-41	tr|A0A096P7E3|A0A096P7E3_OSTTA ABC transporter, conserved site OS=Ostreococcus tauri GN=OT_ostta03g00040 PE=4 SV=1 3.9e-35	GO:0005524, ATP binding;GO:0006813, potassium ion transport;GO:0008281, sulfonylurea receptor activity;GO:0016021, integral component of membrane;GO:0042626, ATPase activity, coupled to transmembrane movement of substances	-
TRINITY_DN165308_c0_g1	AGGTCGATAACCTTCGTTTCTCCTATGACCCCGAGAAACTCCCATTCATTTTTGATACCCCAATCAACTACGAGATCAAAGTCGGAACTCGTGTTGGTATTATCGGCCCTAACGGAGCGGGCAAATCGACGCTCCTCAAGTTAGTTACCGGAAAGTTGAACCCAACTACTGGAGCCATCATTCGTCACCCCGACTTCGTTACCGCCA	COG1134, TagH, ABC-type polysaccharide/polyol phosphate transport system, ATPase component [Carbohydrate transport and metabolism / Cell envelope biogenesis, outer membrane]. 1.9845e-10	KOG0927, KOG0927, KOG0927, Predicted transporter (ABC superfamily) [General function prediction only]. 9.06259e-15	gi|255077906|ref|XP_002502533.1| predicted protein [Micromonas commoda] 1.7e-11	-	pfam00005, ABC_tran, ABC transporter. ABC transporters for a large family of proteins responsible for translocation of a variety of compounds across biological membranes. ABC transporters are the largest family of proteins in many completely sequenced bacteria. ABC transporters are composed of two copies of this domain and two copies of a transmembrane domain pfam00664. These four domains may bel…	sp|Q75EV6|EF3_ASHGO Elongation factor 3 OS=Ashbya gossypii (strain ATCC 10895 / CBS 109.51 / FGSC 9923 / NRRL Y-1056) GN=TEF3 PE=3 SV=2 4.81963e-12	tr|C1E6D3|C1E6D3_MICSR Uncharacterized protein OS=Micromonas sp. (strain RCC299 / NOUM17) GN=MICPUN_58625 PE=4 SV=1 1.3e-11	GO:0003746, translation elongation factor activity;GO:0005524, ATP binding;GO:0016887, ATPase activity;GO:0046872, metal ion binding	-
TRINITY_DN164793_c0_g1	GCTGAGTGTTGGGAGTACATTCCAAGCTTGAGATGGGTGTGGCGGGAGACGGTACCAGAGGTGGGCGAGAGCTTGCCTGTGAAGATGCGAAGTAAAGTCGATTTGCCGACACCATTAGGACCGACAAGAGCTGTTCGGGAGTCCATATCTACACCGAAGTCAAGGTTCTCGTACAGGTTATCCTCGGATTTACCAGAGTAAGAGAAGGTGACGTCGTCAAGGGACAGGACTGGTGGTG	PLN03073, PLN03073, ABC transporter F family; Provisional. 4.45267e-23	KOG0066, KOG0066, KOG0066, eIF2-interacting protein ABC50 (ABC superfamily) [Translation, ribosomal structure and biogenesis]. 1.08834e-25	gi|303276174|ref|XP_003057381.1| zinc finger/ABC transporter fusion protein [Micromonas pusilla CCMP1545] 6.0e-24	gi|1030136300|ref|XM_016905637.1| Sphaerulina musiva SO2202 ABC_tran-domain-containing protein mRNA 2.84432e-43	pfam00005, ABC_tran, ABC transporter. ABC transporters for a large family of proteins responsible for translocation of a variety of compounds across biological membranes. ABC transporters are the largest family of proteins in many completely sequenced bacteria. ABC transporters are composed of two copies of this domain and two copies of a transmembrane domain pfam00664. These four domains may bel…	sp|P40024|ARB1_YEAST ABC transporter ATP-binding protein ARB1 OS=Saccharomyces cerevisiae (strain ATCC 204508 / S288c) GN=ARB1 PE=1 SV=1 3.49002e-34	tr|A0A061R4V4|A0A061R4V4_9CHLO ATP-binding cassette, subfamily F, member 2 OS=Tetraselmis sp. GSL018 GN=ABCF2 PE=4 SV=1 1.6e-24	GO:0000056, ribosomal small subunit export from nucleus;GO:0005524, ATP binding;GO:0005634, nucleus;GO:0005737, cytoplasm;GO:0016887, ATPase activity;GO:0042254, ribosome biogenesis;GO:0042624, ATPase activity, uncoupled	-
TRINITY_DN163945_c0_g1	GGAGAAGAGGACTGGCTCTTGCCCGACAAATCCAATCTTTCGCCTCAATTGCTTTGCATTCAGCTTCGTGATGTCTCGGCCGTTCACGGTGATAGTACCAGCTGTTGGTACGTAGAAGCGCAGGAGCAAGCTAGCGACGGTCGACTTTCCAGCACCGCTAGGCGCGACGATGGCAACATTGGTACCCTGCTCAATTCTGAAATTCAGGTCCTTGAAGATGCTCACAGCTGGCCGAGTAGGATAGCTGAACGAGACATTCTTGAACTCGATCGGCCCTCGAGCTGATTTTACTGACTCGCCCTTGGTTGGTGATATCGATGGCTGGCGATCTTGAAGTTCAAAGAGTC	cd03249, ABC_MTABC3_MDL1_MDL2, ATP-binding cassette domain of a mitochondrial protein MTABC3 and related proteins. MTABC3 (also known as ABCB6) is a mitochondrial ATP-binding cassette protein involved in iron homeostasis and one of four ABC transporters expressed in the mitochondrial inner membrane, the other three being MDL1(ABC7), MDL2, and ATM1. In fact, the yeast MDL1 (multidrug resistance-li…	KOG0058, KOG0058, KOG0058, Peptide exporter, ABC superfamily [Intracellular trafficking, secretion, and vesicular transport]. 2.36152e-38	gi|734417440|gb|KHN38940.1| ABC transporter B family member 2 [Glycine soja] 1.4e-29	gi|627818672|ref|XM_007683986.1| Bipolaris oryzae ATCC 44560 hypothetical protein partial mRNA 1.21132e-43	pfam00005, ABC_tran, ABC transporter. ABC transporters for a large family of proteins responsible for translocation of a variety of compounds across biological membranes. ABC transporters are the largest family of proteins in many completely sequenced bacteria. ABC transporters are composed of two copies of this domain and two copies of a transmembrane domain pfam00664. These four domains may bel…	sp|P33311|MDL2_YEAST ATP-dependent permease MDL2, mitochondrial OS=Saccharomyces cerevisiae (strain ATCC 204508 / S288c) GN=MDL2 PE=1 SV=3 2.18039e-46	tr|I1J4T8|I1J4T8_SOYBN Uncharacterized protein OS=Glycine max GN=GLYMA_01G016500 PE=4 SV=1 1.1e-29	GO:0005524, ATP binding;GO:0005743, mitochondrial inner membrane;GO:0015421, oligopeptide-transporting ATPase activity;GO:0016021, integral component of membrane;GO:0042626, ATPase activity, coupled to transmembrane movement of substances;GO:0055085, transmembrane transport;GO:0070301, cellular response to hydrogen peroxide;GO:0090374, oligopeptide export from mitochondrion	-
TRINITY_DN158718_c0_g1	AACGAGTTGGTGTCGTCGGGCGAACAGGCGCCGGGAAGAGTTCCATGACGCTTGCTTTGTTCAGGTTCTTGAAAGCACGGGAAGGATCCATTGTCATTGACGGCTTGGATATCTCGAAGATCCCCTTGAAAGATTTAAGAAGCCGACTCGCCATCATTCCGCAGGATCCGGTCCTCTTCTCCGGCACGATCAGGTCGAATCTGGACCCATTCAACGAGCACACAGACGATGAATGCAG	cd03369, ABCC_NFT1, ATP-binding cassette domain 2 of NFT1, subfamily C. Domain 2 of NFT1 (New full-length MRP-type transporter 1). NFT1 belongs to the MRP (multidrug resistance-associated protein) family of ABC transporters. Some of the MRP members have five additional transmembrane segments in their N-terminus, but the function of these additional membrane-spanning domains is not clear. The MRP …	KOG0054, KOG0054, KOG0054, Multidrug resistance-associated protein/mitoxantrone resistance protein, ABC superfamily [Secondary metabolites biosynthesis, transport and catabolism]. 9.2137e-35	gi|1026765908|gb|OAE26537.1| hypothetical protein AXG93_1406s1290 [Marchantia polymorpha subsp. polymorpha] 1.3e-23	-	pfam00005, ABC_tran, ABC transporter. ABC transporters for a large family of proteins responsible for translocation of a variety of compounds across biological membranes. ABC transporters are the largest family of proteins in many completely sequenced bacteria. ABC transporters are composed of two copies of this domain and two copies of a transmembrane domain pfam00664. These four domains may bel…	sp|Q54JR2|ABCC3_DICDI ABC transporter C family member 3 OS=Dictyostelium discoideum GN=abcC3 PE=3 SV=1 1.83224e-32	tr|A0A067K4P5|A0A067K4P5_JATCU Uncharacterized protein OS=Jatropha curcas GN=JCGZ_17912 PE=4 SV=1 1.3e-23	GO:0005215, transporter activity;GO:0005524, ATP binding;GO:0006810, transport;GO:0016021, integral component of membrane;GO:0031154, culmination involved in sorocarp development;GO:0042626, ATPase activity, coupled to transmembrane movement of substances	-
TRINITY_DN150885_c0_g1	GGAACTATCGAACTACGAAATATCAAGCATATCTACCCTTCCAGGCCGGAAGTGGTGGTTATGAACGGAGTCAGCTTGCTTATTCCTGCGGGAAAGAAGACCGCTCTTGTTGGTGCATCTGGATCTGGAAAGAGTACAATTGTTGGCTTGGTTGAAAGATTTTACGATCCAGTTGGAGGACAAGTCCTCTTGGACGGACACGATGTTAGCACTTTGAATCTTAGATGGCTGCGTCAACAAG	cd03249, ABC_MTABC3_MDL1_MDL2, ATP-binding cassette domain of a mitochondrial protein MTABC3 and related proteins. MTABC3 (also known as ABCB6) is a mitochondrial ATP-binding cassette protein involved in iron homeostasis and one of four ABC transporters expressed in the mitochondrial inner membrane, the other three being MDL1(ABC7), MDL2, and ATM1. In fact, the yeast MDL1 (multidrug resistance-li…	KOG0055, KOG0055, KOG0055, Multidrug/pheromone exporter, ABC superfamily [Secondary metabolites biosynthesis, transport and catabolism]. 4.69964e-30	gi|1012326801|gb|KYP38572.1| ABC transporter B family member 1 [Cajanus cajan] 5.4e-28	-	pfam00005, ABC_tran, ABC transporter. ABC transporters for a large family of proteins responsible for translocation of a variety of compounds across biological membranes. ABC transporters are the largest family of proteins in many completely sequenced bacteria. ABC transporters are composed of two copies of this domain and two copies of a transmembrane domain pfam00664. These four domains may bel…	sp|P36619|PMD1_SCHPO Leptomycin B resistance protein pmd1 OS=Schizosaccharomyces pombe (strain 972 / ATCC 24843) GN=pmd1 PE=3 SV=2 7.68901e-33	tr|A0A0L9TXS0|A0A0L9TXS0_PHAAN Uncharacterized protein OS=Phaseolus angularis GN=LR48_Vigan02g134700 PE=4 SV=1 4.5e-27	GO:0005524, ATP binding;GO:0005773, vacuole;GO:0005886, plasma membrane;GO:0006855, drug transmembrane transport;GO:0016021, integral component of membrane;GO:0042626, ATPase activity, coupled to transmembrane movement of substances;GO:0046677, response to antibiotic	-
TRINITY_DN147601_c0_g1	ACTTCACATATAAGTCTCGTGAGGTACCAGTACTTTCGAAACTCAACTTGAAGGTCGAAGCTGGTCAGTTTGCGGCGCTGGTTGGAGCGTCGGGCTGCGGCAAATCCACCTCTATATCCCTCCTCGAGCGCTTCTACGATGCCACCAAAGGCACCATTCTCTACAATGGCCAAGATATCACCACCCTCTCGCCCTCCTCATACCGCGCACAACACAG	cd03249, ABC_MTABC3_MDL1_MDL2, ATP-binding cassette domain of a mitochondrial protein MTABC3 and related proteins. MTABC3 (also known as ABCB6) is a mitochondrial ATP-binding cassette protein involved in iron homeostasis and one of four ABC transporters expressed in the mitochondrial inner membrane, the other three being MDL1(ABC7), MDL2, and ATM1. In fact, the yeast MDL1 (multidrug resistance-li…	KOG0055, KOG0055, KOG0055, Multidrug/pheromone exporter, ABC superfamily [Secondary metabolites biosynthesis, transport and catabolism]. 3.19939e-17	gi|255552900|ref|XP_002517493.1| PREDICTED: ABC transporter B family member 19 [Ricinus communis] 2.5e-13	-	pfam00005, ABC_tran, ABC transporter. ABC transporters for a large family of proteins responsible for translocation of a variety of compounds across biological membranes. ABC transporters are the largest family of proteins in many completely sequenced bacteria. ABC transporters are composed of two copies of this domain and two copies of a transmembrane domain pfam00664. These four domains may bel…	sp|P08183|MDR1_HUMAN Multidrug resistance protein 1 OS=Homo sapiens GN=ABCB1 PE=1 SV=3 2.82517e-17	tr|B9RUP8|B9RUP8_RICCO Multidrug resistance protein 1, 2, putative OS=Ricinus communis GN=RCOM_0855230 PE=4 SV=1 1.9e-13	GO:0000086, G2/M transition of mitotic cell cycle;GO:0002481, antigen processing and presentation of exogenous protein antigen via MHC class Ib, TAP-dependent;GO:0002485, antigen processing and presentation of endogenous peptide antigen via MHC class I via ER pathway, TAP-dependent;GO:0002489, antigen processing and presentation of endogenous peptide antigen via MHC class Ib via ER pathway, TAP-d…	-
TRINITY_DN147379_c0_g1	GGGTCGGTAAGAATCTGGACAGCAATAGTGACTCGACGCTTCTCACCGCCCGAGATTCCCTTAATGAGGTCGTTTCCAACGAGATTGTCGGCGCAGTCCTTGAGTCCCATCTTAAGGAGTACCTCTTCCGCGCGCTTATACTTCTCCGCCCGACTCATGAACGAAGGCAGCCGTAGACCAGCCGCGAATCGCAGGGTTTCACGGACGGTAAGAGAGGGCAACAATGCCTCGTCGTCTTGGCAAACGTAGGAACAGACTGAGCGAATCACCTGAGGTGAGGGTTCGGCGCCGTT	cd03234, ABCG_White, White pigment protein homolog of ABCG transporter subfamily. The White subfamily represents ABC transporters homologous to the Drosophila white gene, which acts as a dimeric importer for eye pigment precursors. The eye pigmentation of Drosophila is developed from the synthesis and deposition in the cells of red pigments, which are synthesized from guanine, and brown pigments,…	KOG0061, KOG0061, KOG0061, Transporter, ABC superfamily (Breast cancer resistance protein) [Secondary metabolites biosynthesis, transport and catabolism]. 2.01389e-24	gi|971508776|dbj|GAQ89430.1| ABC transporter G family [Klebsormidium flaccidum] 2.1e-18	-	pfam00005, ABC_tran, ABC transporter. ABC transporters for a large family of proteins responsible for translocation of a variety of compounds across biological membranes. ABC transporters are the largest family of proteins in many completely sequenced bacteria. ABC transporters are composed of two copies of this domain and two copies of a transmembrane domain pfam00664. These four domains may bel…	sp|Q08234|YO075_YEAST Uncharacterized ABC transporter ATP-binding protein/permease YOL075C OS=Saccharomyces cerevisiae (strain ATCC 204508 / S288c) GN=YOL075C PE=1 SV=3 1.10332e-27	tr|A9SES7|A9SES7_PHYPA ATP-binding cassette transporter, subfamily G, member 10, group WBC protein PpABCG10 (Fragment) OS=Physcomitrella patens subsp. patens GN=ppabcg10 PE=4 SV=1 1.0e-17	GO:0000329, fungal-type vacuole membrane;GO:0005524, ATP binding;GO:0005886, plasma membrane;GO:0006810, transport;GO:0008559, xenobiotic transmembrane transporting ATPase activity;GO:0016021, integral component of membrane;GO:0035690, cellular response to drug;GO:0042626, ATPase activity, coupled to transmembrane movement of substances	-
TRINITY_DN147292_c0_g1	CGGCAATGGAGCCGGAAAAGAGTACAGGTTCTTGACCGACCATGCCAATTCGGCGACGAAGTGATTTGATGTTCATGGTCGATATATCAACTCCGTTGATGGCAATACTTCCCTCGGTCGGATTGTAGAATCTCAAAAGCAGGGAGCCAATAGTCGACTTTCCTCCACCACTGGGCCCGACAATGGCTACATTCGTGCCGGATGGGATTTCGAAATCAAGACCTTCGAAGATCGAGACAGCTGGTCGAGTTGGGTATGCAAAGCTGACATTCG	cd03249, ABC_MTABC3_MDL1_MDL2, ATP-binding cassette domain of a mitochondrial protein MTABC3 and related proteins. MTABC3 (also known as ABCB6) is a mitochondrial ATP-binding cassette protein involved in iron homeostasis and one of four ABC transporters expressed in the mitochondrial inner membrane, the other three being MDL1(ABC7), MDL2, and ATM1. In fact, the yeast MDL1 (multidrug resistance-li…	KOG0058, KOG0058, KOG0058, Peptide exporter, ABC superfamily [Intracellular trafficking, secretion, and vesicular transport]. 3.28759e-34	gi|747073044|ref|XP_011083466.1| PREDICTED: LOW QUALITY PROTEIN: ABC transporter B family member 13-like [Sesamum indicum] 8.2e-25	-	pfam00005, ABC_tran, ABC transporter. ABC transporters for a large family of proteins responsible for translocation of a variety of compounds across biological membranes. ABC transporters are the largest family of proteins in many completely sequenced bacteria. ABC transporters are composed of two copies of this domain and two copies of a transmembrane domain pfam00664. These four domains may bel…	sp|Q9Y7M7|MDL1_SCHPO ATP-dependent permease MDL1, mitochondrial OS=Schizosaccharomyces pombe (strain 972 / ATCC 24843) GN=mdl1 PE=3 SV=1 8.55907e-34	tr|A0A0J8E9K1|A0A0J8E9K1_BETVU Uncharacterized protein OS=Beta vulgaris subsp. vulgaris GN=BVRB_1g020690 PE=4 SV=1 3.4e-23	GO:0005524, ATP binding;GO:0005739, mitochondrion;GO:0005743, mitochondrial inner membrane;GO:0015421, oligopeptide-transporting ATPase activity;GO:0016021, integral component of membrane;GO:0042626, ATPase activity, coupled to transmembrane movement of substances;GO:0055085, transmembrane transport;GO:0090374, oligopeptide export from mitochondrion	-
TRINITY_DN14542_c0_g1	CGCTTCGATCTCCTCGGCAGTGGCATCGGTGCCTGGGCGGGCTCCTAATCCGACGTTGAATGTGATACTTCCGTCGAAGAGCGCTGGGGATTGCGGCACGAGGGCGATGTCATCACGGATGGCTGCCACAGCATCCGGACGAGAGAGGTCAAACCCATCGAGCCTGACGGCGCCAGATGTGGGCTGGTAGAGCCTTTGGATGAGGGACATGATGGTGGATTTACCAGATCGGAAG	cd03249, ABC_MTABC3_MDL1_MDL2, ATP-binding cassette domain of a mitochondrial protein MTABC3 and related proteins. MTABC3 (also known as ABCB6) is a mitochondrial ATP-binding cassette protein involved in iron homeostasis and one of four ABC transporters expressed in the mitochondrial inner membrane, the other three being MDL1(ABC7), MDL2, and ATM1. In fact, the yeast MDL1 (multidrug resistance-li…	KOG0058, KOG0058, KOG0058, Peptide exporter, ABC superfamily [Intracellular trafficking, secretion, and vesicular transport]. 2.58144e-13	gi|302814037|ref|XP_002988703.1| hypothetical protein SELMODRAFT_184079 [Selaginella moellendorffii] 6.4e-10	-	pfam00005, ABC_tran, ABC transporter. ABC transporters for a large family of proteins responsible for translocation of a variety of compounds across biological membranes. ABC transporters are the largest family of proteins in many completely sequenced bacteria. ABC transporters are composed of two copies of this domain and two copies of a transmembrane domain pfam00664. These four domains may bel…	sp|P16875|MDR1_ENTHI Multidrug resistance protein 1 (Fragment) OS=Entamoeba histolytica GN=MDR1 PE=3 SV=1 4.04121e-14	tr|D8SSI0|D8SSI0_SELML ATP-binding cassette transporter OS=Selaginella moellendorffii GN=PGP4B-1 PE=4 SV=1 4.9e-10	GO:0005524, ATP binding;GO:0006810, transport;GO:0016021, integral component of membrane;GO:0016887, ATPase activity;GO:0042626, ATPase activity, coupled to transmembrane movement of substances	-
TRINITY_DN141552_c0_g1	GCGTTCCGCTCTCAACGATGACACCTTGGTCAAAGACGTAGATGATATCAGCTTTCTGGATCGTACTTAATCGATGGGCGACCGCGATTGTAGTTCGACCCTTGGCTGCTTTATCTAACGCTGCTTGCACAACGTGCTCAGATTCCGAATCGAGAGCTGAAGTAGCTTCGTCCAAAAGAAGAATCTTAGGGTCACGGAGAAGAGCACGGGCGATAGCGATACGTTGCTTTTGTCCTCCTGACAATAGGGAGCCCTTAGATCCAACAATGGTAGAGAAGCCTTCGGGCAGAGACATGATGAAATCGTAGATGTTGGCTTCGCGGCATGCAAATTCGACCTCGGAGTCTGGGACATCTGGTCTATTGCCGCCCAGGAGGATGTTCTCACGAATGGTACCTT…	cd03249, ABC_MTABC3_MDL1_MDL2, ATP-binding cassette domain of a mitochondrial protein MTABC3 and related proteins. MTABC3 (also known as ABCB6) is a mitochondrial ATP-binding cassette protein involved in iron homeostasis and one of four ABC transporters expressed in the mitochondrial inner membrane, the other three being MDL1(ABC7), MDL2, and ATM1. In fact, the yeast MDL1 (multidrug resistance-li…	KOG0055, KOG0055, KOG0055, Multidrug/pheromone exporter, ABC superfamily [Secondary metabolites biosynthesis, transport and catabolism]. 3.69371e-103	gi|971520087|dbj|GAQ78132.1| ATP binding cassette subfamily B [Klebsormidium flaccidum] 1.3e-86	gi|636750374|ref|XM_008079170.1| Glarea lozoyensis ATCC 20868 P-loop containing nucleoside triphosphate hydrolase mRNA 0.0	pfam00005, ABC_tran, ABC transporter. ABC transporters for a large family of proteins responsible for translocation of a variety of compounds across biological membranes. ABC transporters are the largest family of proteins in many completely sequenced bacteria. ABC transporters are composed of two copies of this domain and two copies of a transmembrane domain pfam00664. These four domains may bel…	sp|P36619|PMD1_SCHPO Leptomycin B resistance protein pmd1 OS=Schizosaccharomyces pombe (strain 972 / ATCC 24843) GN=pmd1 PE=3 SV=2 4.43681e-155	tr|E1Z685|E1Z685_CHLVA Putative uncharacterized protein OS=Chlorella variabilis GN=CHLNCDRAFT_34209 PE=4 SV=1 1.9e-85	GO:0005524, ATP binding;GO:0005773, vacuole;GO:0005886, plasma membrane;GO:0006855, drug transmembrane transport;GO:0016021, integral component of membrane;GO:0042626, ATPase activity, coupled to transmembrane movement of substances;GO:0046677, response to antibiotic	-
TRINITY_DN138961_c0_g1	AATCGTATCTTGTGGCACCACTCCAATATGTTGACGATAACTCTCTAAAGTCAGATCTCGAATATCACGACCATCAATCTCAATACTGCCTTCGCTCACGTCATAGAACCGCAAACATAATTTGAGGCAAGTTGACTTGCCACTTCCACTTTCTCCAACAATGGCAGTAGAGCTTCCTGGTTCGGCTGTGAAAGACAAGTTCTCGATGCTGTGTTTCCGGCCTTCATAAGCAAAGGAAACTTTCAAGAATTTTATGCGGCCCTCGCAGCTTGTAAGGGTTGATGCATTTTCTGCATCTGTGATCAAGGGCTTGATTTTGAACAAGTTAAGCATGCGCTCTGAATCGATGAGATTATTTTGCACCTGATTGTAGAAACTTCCGAAAAACTGGAGAGGCGC…	COG5265, ATM1, ABC-type transport system involved in Fe-S cluster assembly, permease and ATPase components [Posttranslational modification, protein turnover, chaperones]. 2.40114e-41	KOG0056, KOG0056, KOG0056, Heavy metal exporter HMT1, ABC superfamily [Inorganic ion transport and metabolism]. 3.71613e-46	gi|769814241|ref|XP_006842605.2| PREDICTED: ABC transporter B family member 25, mitochondrial [Amborella trichopoda] 1.5e-30	-	pfam00005, ABC_tran, ABC transporter. ABC transporters for a large family of proteins responsible for translocation of a variety of compounds across biological membranes. ABC transporters are the largest family of proteins in many completely sequenced bacteria. ABC transporters are composed of two copies of this domain and two copies of a transmembrane domain pfam00664. These four domains may bel…	sp|Q02592|HMT1_SCHPO Heavy metal tolerance protein OS=Schizosaccharomyces pombe (strain 972 / ATCC 24843) GN=hmt1 PE=2 SV=3 1.18604e-49	tr|W1PB81|W1PB81_AMBTC Uncharacterized protein OS=Amborella trichopoda GN=AMTR_s00077p00170260 PE=4 SV=1 1.2e-30	GO:0000329, fungal-type vacuole membrane;GO:0005524, ATP binding;GO:0005743, mitochondrial inner membrane;GO:0005773, vacuole;GO:0006879, cellular iron ion homeostasis;GO:0016021, integral component of membrane;GO:0036246, phytochelatin 2 import into vacuole;GO:0036249, cadmium ion import into vacuole;GO:0042626, ATPase activity, coupled to transmembrane movement of substances;GO:0044604, phytoch…	-
TRINITY_DN136636_c0_g1	GAGATTGTCTTCAATAACGTGGAGATGCGTTATAGAGATGGCTTGCCGCTGGTGTTGAAAGGCCTCGATATGCATGTCAAAGCAGGCGAGCGCATCGGAGTTGTTGGCAGGACTGGTGCAGGCAAGTCAAGTATCATGAGCACACTCTTCCGTCTAGTCGAACTTTCTGGAGGTTCCATCACTATCGATGGCGTCGACATCAGCACTATTGGACTTCACGACCTTCGCTCGAAACTGGCAATCATCCCGCAAGACCCTA	cd03244, ABCC_MRP_domain2, ATP-binding cassette domain 2 of multidrug resistance-associated protein. The ABC subfamily C is also known as MRP (multidrug resistance-associated protein). Some of the MRP members have five additional transmembrane segments in their N-terminus, but the function of these additional membrane-spanning domains is not clear. The MRP was found in the multidrug-resistance lu…	KOG0054, KOG0054, KOG0054, Multidrug resistance-associated protein/mitoxantrone resistance protein, ABC superfamily [Secondary metabolites biosynthesis, transport and catabolism]. 2.24263e-34	gi|1026774172|gb|OAE33303.1| hypothetical protein AXG93_1200s1650 [Marchantia polymorpha subsp. polymorpha] 5.4e-26	-	pfam00005, ABC_tran, ABC transporter. ABC transporters for a large family of proteins responsible for translocation of a variety of compounds across biological membranes. ABC transporters are the largest family of proteins in many completely sequenced bacteria. ABC transporters are composed of two copies of this domain and two copies of a transmembrane domain pfam00664. These four domains may bel…	sp|P53049|YOR1_YEAST Oligomycin resistance ATP-dependent permease YOR1 OS=Saccharomyces cerevisiae (strain ATCC 204508 / S288c) GN=YOR1 PE=1 SV=1 1.21482e-33	tr|I0Z8F4|I0Z8F4_9CHLO Uncharacterized protein OS=Coccomyxa subellipsoidea C-169 GN=COCSUDRAFT_46284 PE=4 SV=1 9.2e-26	GO:0005524, ATP binding;GO:0005886, plasma membrane;GO:0008559, xenobiotic transmembrane transporting ATPase activity;GO:0016021, integral component of membrane;GO:0042626, ATPase activity, coupled to transmembrane movement of substances;GO:0042908, xenobiotic transport	-
TRINITY_DN136077_c0_g1	GTGCCGTCAATCTCGATGGATCCCGTGGTAATCGTATTGAGGCCTGAGATGGCGTCTAGAGTCGTCGACTTGCCACTTCCGTTCGCTCCCAGGAGCACCATGATCTGACCCTTTCGAGCCTTAATGCTGAGGTCATTGACTGCGAGGACAGTTTCTGGCGGCGAGATTCCAATCTTGGCTAGGACTTTAGCACGGAACCAGCTGGGCTTCCAGTGCTTTGAGAAATTCGTGAGAATAATGTTGTGATCCGGGGACGACGTTGTAG	COG4586, COG4586, ABC-type uncharacterized transport system, ATPase component [General function prediction only]. 5.92488e-09	-	-	-	pfam00005, ABC_tran, ABC transporter. ABC transporters for a large family of proteins responsible for translocation of a variety of compounds across biological membranes. ABC transporters are the largest family of proteins in many completely sequenced bacteria. ABC transporters are composed of two copies of this domain and two copies of a transmembrane domain pfam00664. These four domains may bel…	sp|Q1QYT1|ARAG_CHRSD Arabinose import ATP-binding protein AraG OS=Chromohalobacter salexigens (strain DSM 3043 / ATCC BAA-138 / NCIMB 13768) GN=araG PE=3 SV=1 1.49056e-07	-	GO:0005524, ATP binding;GO:0005886, plasma membrane;GO:0015407, monosaccharide-transporting ATPase activity	-
TRINITY_DN128454_c0_g1	GTTTCATATATCTTATAAGCAGCAATTTGTCCAGCAGTAAATGCAGTCAAGCATGGAGATGTTTGTCCCAGCGAAATAGAGCCGGTTAAGACAGCAACGATCACGTTTATGGCCTCTCCAGCAGCATAATTTTTGTGTAAGATCATTCTTCCGCCAAACCACACAGCCAATGCATAACTATTGTAGAGGACCAACATATTTAGGCCAGCACCTAACCCAGCCGTCAAGCCCTCTTTCACACCAGATAAGTAAGCTGTGTCAAGGGACTCATCAAATATAGAGAGGGCTTGCCTCTCCCCTGTAAAAGATGCAACTGTTCTAATTGAGCCAACTGTCTGTTCAACTATG	pfam00664, ABC_membrane, ABC transporter transmembrane region. This family represents a unit of six transmembrane helices. Many members of the ABC transporter family (pfam00005) have two such regions. 1.34869e-11	KOG0055, KOG0055, KOG0055, Multidrug/pheromone exporter, ABC superfamily [Secondary metabolites biosynthesis, transport and catabolism]. 1.55757e-25	gi|1021025064|gb|KZM82852.1| hypothetical protein DCAR_030421 [Daucus carota subsp. sativus] 4.2e-50	-	pfam00664, ABC_membrane, ABC transporter transmembrane region. This family represents a unit of six transmembrane helices. Many members of the ABC transporter family (pfam00005) have two such regions. 3.22213e-12	sp|Q9SYI3|AB5B_ARATH ABC transporter B family member 5 OS=Arabidopsis thaliana GN=ABCB5 PE=3 SV=1 1.98374e-41	tr|B9GT94|B9GT94_POPTR Multidrug resistant ABC transporter family protein OS=Populus trichocarpa GN=POPTR_0002s18860g PE=4 SV=1 8.2e-38	GO:0005524, ATP binding;GO:0010329, auxin efflux transmembrane transporter activity;GO:0010540, basipetal auxin transport;GO:0016021, integral component of membrane;GO:0042626, ATPase activity, coupled to transmembrane movement of substances	-
TRINITY_DN12637_c0_g1	GCTTCATCAGCTACTGGAAGCTTACCTTAATCCTGTCCAGCACCGTGTTCGCCCTGCTCCTTTGCATGGGTAGCGGGTCGAGGTTCATCGTCAAGTTCTCCAGGCAGAATATCCAGTCCTATGCCGAATGTGCCACGGTCGCCGACGAGGTCATCAGCAGTGTCCGTAACGCTGTTGCTTTTGGGACACAGGATCGCCTGGCTAGACAATACGACTCGCACCTCGTCAAGGCCGAGTTCTTTGGTTTCAGGCTGAAGATGACACTCTCCTTCATGGTCGCTGGCATGATGTGCATTTTGTACCTGAATTACGGCCTCGCCTTCTGGCAGGGTTCCCGGTACCTGGTTGATGAAGTCATCTCGCTGAGCAAGGTGCTTATTATAATGATGTCTATTATGA…	pfam00664, ABC_membrane, ABC transporter transmembrane region. This family represents a unit of six transmembrane helices. Many members of the ABC transporter family (pfam00005) have two such regions. 1.87405e-09	KOG0055, KOG0055, KOG0055, Multidrug/pheromone exporter, ABC superfamily [Secondary metabolites biosynthesis, transport and catabolism]. 1.93841e-24	gi|747097043|ref|XP_011096468.1| PREDICTED: ABC transporter B family member 9 [Sesamum indicum] 1.1e-17	-	pfam00664, ABC_membrane, ABC transporter transmembrane region. This family represents a unit of six transmembrane helices. Many members of the ABC transporter family (pfam00005) have two such regions. 4.47725e-10	sp|P36619|PMD1_SCHPO Leptomycin B resistance protein pmd1 OS=Schizosaccharomyces pombe (strain 972 / ATCC 24843) GN=pmd1 PE=3 SV=2 7.98117e-39	tr|M1A0E1|M1A0E1_SOLTU Uncharacterized protein OS=Solanum tuberosum GN=PGSC0003DMG400004681 PE=4 SV=1 8.5e-18	GO:0005524, ATP binding;GO:0005773, vacuole;GO:0005886, plasma membrane;GO:0006855, drug transmembrane transport;GO:0016021, integral component of membrane;GO:0042626, ATPase activity, coupled to transmembrane movement of substances;GO:0046677, response to antibiotic	-
TRINITY_DN126327_c0_g1	GCCTGGAGCGAAAGCTGCATATAGGTGGAAACAAACTTGTTCATAATACCGCCGGTGATCGCAATGCATGGCAAGATGGAAGAAATTGCAAGGGCGAGACGCCAAGAGCGGATGTAGGCCAAGACGAAACCGGTGAAGAAGGCACCAAGGTAACTAATAATCAGCGGAACTTTTTCGGACATGCCCATTTGAACAAGGTGGGTGTCGGTCTGGATTCGGGTGGCGACTTCACCGGCACCAAGGTTGTCAAAGTAGGCAATATCCTGGCGCAAGACGGCCTGGAGATAACGCTCGCGAATACGCTTCGAGTTGA	pfam00664, ABC_membrane, ABC transporter transmembrane region. This family represents a unit of six transmembrane helices. Many members of the ABC transporter family (pfam00005) have two such regions. 3.17982e-09	KOG0055, KOG0055, KOG0055, Multidrug/pheromone exporter, ABC superfamily [Secondary metabolites biosynthesis, transport and catabolism]. 3.40012e-23	gi|302753744|ref|XP_002960296.1| ATP-binding cassette transporter [Selaginella moellendorffii] 1.6e-16	-	pfam00664, ABC_membrane, ABC transporter transmembrane region. This family represents a unit of six transmembrane helices. Many members of the ABC transporter family (pfam00005) have two such regions. 7.59686e-10	sp|P36619|PMD1_SCHPO Leptomycin B resistance protein pmd1 OS=Schizosaccharomyces pombe (strain 972 / ATCC 24843) GN=pmd1 PE=3 SV=2 8.0776e-25	tr|D8QQP9|D8QQP9_SELML ATP-binding cassette transporter OS=Selaginella moellendorffii GN=PGP4D-1 PE=4 SV=1 1.2e-16	GO:0005524, ATP binding;GO:0005773, vacuole;GO:0005886, plasma membrane;GO:0006855, drug transmembrane transport;GO:0016021, integral component of membrane;GO:0042626, ATPase activity, coupled to transmembrane movement of substances;GO:0046677, response to antibiotic	-
TRINITY_DN124872_c0_g1	GGCAACCGCTATCTTCAGGTCTCCTATGTCTTTTTTCGATGTGACACCTGCGGGCCGCATCTTGAACAGATTTTCTAGTGACATCTATCGGGTTGACGAACTCCTTGGCCGTACCTTCAACATGCTGTTCGTAAACTTGGCGAAATCCGGCTTTACTCTAGTCATCATCTCGGTGACTGTCCCGGCATTTGTGGCTATGATTATTCCCTTGGGCTTTGTGTACATGTGGATACAACGGTATTATCTCCGTACATCACGCGAGCTCAAGAGGTTGGATAGCGTTAGCCGGAGCCCAATCTACGCTCACTTTCAGGAATCACTTGGTGGAATTTCGACCATACGAGCATATCGTC	TIGR00957, Multidrug_resistance-associated_protein_1, multi drug resistance-associated protein (MRP). This model describes multi drug resistance-associated protein (MRP) in eukaryotes. The multidrug resistance-associated protein is an integral membrane protein that causes multidrug resistance when overexpressed in mammalian cells. It belongs to ABC transporter superfamily. The protein topology an…	KOG0054, KOG0054, KOG0054, Multidrug resistance-associated protein/mitoxantrone resistance protein, ABC superfamily [Secondary metabolites biosynthesis, transport and catabolism]. 3.13624e-38	gi|971511486|dbj|GAQ86722.1| ABC transporter C family [Klebsormidium flaccidum] 2.8e-25	-	pfam00664, ABC_membrane, ABC transporter transmembrane region. This family represents a unit of six transmembrane helices. Many members of the ABC transporter family (pfam00005) have two such regions. 3.82515e-10	sp|P39109|YCFI_YEAST Metal resistance protein YCF1 OS=Saccharomyces cerevisiae (strain ATCC 204508 / S288c) GN=YCF1 PE=1 SV=2 1.91634e-44	tr|B9RGL4|B9RGL4_RICCO Multidrug resistance-associated protein, putative OS=Ricinus communis GN=RCOM_1441590 PE=4 SV=1 1.2e-23	GO:0000329, fungal-type vacuole membrane;GO:0005524, ATP binding;GO:0006749, glutathione metabolic process;GO:0010038, response to metal ion;GO:0015127, bilirubin transmembrane transporter activity;GO:0015431, glutathione S-conjugate-exporting ATPase activity;GO:0015723, bilirubin transport;GO:0016021, integral component of membrane;GO:0032440, 2-alkenal reductase [NAD(P)] activity;GO:0042144, va…	-
TRINITY_DN124165_c0_g1	TTGAAAGTGGAAAACCCAATGATGTTTTCTCTGATGGATGTGTTGGAAAGATAGGGCGTTTGATCACAATATCCAATCTTCTGGACAGGACCTGAACTCATGATAATCTCGCCGTGTGTTATGGACACCTCTCCTAGAAGGACTTTACACAACGTCGATTTGCCAGAAGCGACCGGGCCGACCAGAACTGTGAGCTGCGACTTTCTAATGTCAAGGTTGAGATTTTCGAGTGTAGCCTTTCCG	cd03250, ABCC_MRP_domain1, ATP-binding cassette domain 1 of multidrug resistance-associated protein, subfamily C. This subfamily is also known as MRP (multidrug resistance-associated protein). Some of the MRP members have five additional transmembrane segments in their N-terminus, but the function of these additional membrane-spanning domains is not clear. The MRP was found in the multidrug-resis…	KOG0054, KOG0054, KOG0054, Multidrug resistance-associated protein/mitoxantrone resistance protein, ABC superfamily [Secondary metabolites biosynthesis, transport and catabolism]. 1.54182e-13	gi|734372862|gb|KHN19943.1| ABC transporter C family member 10 [Glycine soja] 9.5e-09	-	pfam00005, ABC_tran, ABC transporter. ABC transporters for a large family of proteins responsible for translocation of a variety of compounds across biological membranes. ABC transporters are the largest family of proteins in many completely sequenced bacteria. ABC transporters are composed of two copies of this domain and two copies of a transmembrane domain pfam00664. These four domains may bel…	sp|Q92337|ABC1_SCHPO ATP-binding cassette transporter abc1 OS=Schizosaccharomyces pombe (strain 972 / ATCC 24843) GN=abc1 PE=3 SV=1 1.02342e-10	tr|I1MPC0|I1MPC0_SOYBN Uncharacterized protein OS=Glycine max PE=4 SV=2 7.3e-09	GO:0005524, ATP binding;GO:0005783, endoplasmic reticulum;GO:0016021, integral component of membrane;GO:0042626, ATPase activity, coupled to transmembrane movement of substances	-
TRINITY_DN121001_c0_g1	AACCCGGTAAGGTCACCGGCTTCCTCGGCCCGAACGGGGCCGGCAAGTCCACCACCATGCGGATGATCCTCGGCCTCGACACCCCGACCGGCGGCGAGGTCACGATCGACGGCCAGCTGTACCGCGACCTGAAGCGGCCGCTGACCAAGGTCGGCGCGCTGCTGGATGCCAAGTGGGTGCACCCGAACCGCTCGGCACGCGCCCACCTGGCCTGGATGGCCGCCTCAAAAGAAAAAAAAAAGAAAAATTATAT	cd03268, ABC_BcrA_bacitracin_resist, ATP-binding cassette domain of the bacitracin-resistance transporter. The BcrA subfamily represents ABC transporters involved in peptide antibiotic resistance. Bacitracin is a dodecapeptide antibiotic produced by B. licheniformis and B. subtilis. The synthesis of bacitracin is non-ribosomally catalyzed by a multi-enzyme complex BcrABC. Bacitracin has potent an…	KOG0059, KOG0059, KOG0059, Lipid exporter ABCA1 and related proteins, ABC superfamily [Lipid transport and metabolism, General function prediction only]. 1.8434e-08	gi|1026766038|gb|OAE26645.1| hypothetical protein AXG93_793s1050 [Marchantia polymorpha subsp. polymorpha] 4.6e-06	gi|283807292|gb|CP001736.1| Kribbella flavida DSM 17836, complete genome 1.34202e-81	pfam00005, ABC_tran, ABC transporter. ABC transporters for a large family of proteins responsible for translocation of a variety of compounds across biological membranes. ABC transporters are the largest family of proteins in many completely sequenced bacteria. ABC transporters are composed of two copies of this domain and two copies of a transmembrane domain pfam00664. These four domains may bel…	sp|P42332|BCRA_BACLI Bacitracin transport ATP-binding protein BcrA OS=Bacillus licheniformis GN=bcrA PE=3 SV=1 2.41841e-12	-	GO:0005524, ATP binding;GO:0006810, transport;GO:0016887, ATPase activity;GO:0046677, response to antibiotic	-
TRINITY_DN11903_c0_g1	AAGGTCCTCAAGGGAGTCTCGCCGTCGATCCAGCCCGGTCAGTTTGTCGCCTTCGTAGGCGCTTCGGGCTGTGGGAAAACCACCATGATCAGTCTGCTAGAAAGATTTTACGAGCCTACAGGAGGCGCTCTCCTTCTCGACCAAGTCGACACCCAATCAATACACCTAGGACAATACCGGCGAAATATCGCCTTGGTACAGCAAGAGCCTGTCCTTTATCAAGGGTCACTCCGAGAAAACATATCATTAGGCATTGAGGATGGCCCGAACGGCGAAGTCACCGTCAGCGATGAAGATATTCTCGAGGCTTGCCGACAGGCGAACATCGACACGTTCATCACATCCCTCCCGGACGGCCTGACCACCTCCTGCGGGTCCCAGGGACTCCAGTTCTCGGGC…	cd03249, ABC_MTABC3_MDL1_MDL2, ATP-binding cassette domain of a mitochondrial protein MTABC3 and related proteins. MTABC3 (also known as ABCB6) is a mitochondrial ATP-binding cassette protein involved in iron homeostasis and one of four ABC transporters expressed in the mitochondrial inner membrane, the other three being MDL1(ABC7), MDL2, and ATM1. In fact, the yeast MDL1 (multidrug resistance-li…	KOG0058, KOG0058, KOG0058, Peptide exporter, ABC superfamily [Intracellular trafficking, secretion, and vesicular transport]. 3.22961e-37	gi|661893451|emb|CDP03260.1| unnamed protein product [Coffea canephora] 1.4e-29	-	pfam00005, ABC_tran, ABC transporter. ABC transporters for a large family of proteins responsible for translocation of a variety of compounds across biological membranes. ABC transporters are the largest family of proteins in many completely sequenced bacteria. ABC transporters are composed of two copies of this domain and two copies of a transmembrane domain pfam00664. These four domains may bel…	sp|P36619|PMD1_SCHPO Leptomycin B resistance protein pmd1 OS=Schizosaccharomyces pombe (strain 972 / ATCC 24843) GN=pmd1 PE=3 SV=2 7.36431e-43	tr|A0A068U3Z9|A0A068U3Z9_COFCA Uncharacterized protein OS=Coffea canephora GN=GSCOC_T00041780001 PE=4 SV=1 1.1e-29	GO:0005524, ATP binding;GO:0005773, vacuole;GO:0005886, plasma membrane;GO:0006855, drug transmembrane transport;GO:0016021, integral component of membrane;GO:0042626, ATPase activity, coupled to transmembrane movement of substances;GO:0046677, response to antibiotic	-
TRINITY_DN108324_c0_g1	CTGCTGTACCGTTCCAAAAAGAATGAGCGGGTCTTGGGGTAGAGTCACGAACCGTTCTCGGATGCTGTCGCGGTGAAGGGTTGAAAGGTCGATACCATCGACGATGACTGAACCCTTGTCGATTTCCAGGAGACGCAGAAGCGTTCCTACAAACGAGCTCTTCCCGCTGCCCGTTCGGCCACAGATGCCAACCTTTTGGCCTGGCTGAATAGTGAGCGATATATTATGCAGCGCAACGGCGTTAGGG	cd03244, ABCC_MRP_domain2, ATP-binding cassette domain 2 of multidrug resistance-associated protein. The ABC subfamily C is also known as MRP (multidrug resistance-associated protein). Some of the MRP members have five additional transmembrane segments in their N-terminus, but the function of these additional membrane-spanning domains is not clear. The MRP was found in the multidrug-resistance lu…	KOG0054, KOG0054, KOG0054, Multidrug resistance-associated protein/mitoxantrone resistance protein, ABC superfamily [Secondary metabolites biosynthesis, transport and catabolism]. 1.08264e-20	gi|965664557|dbj|BAT80266.1| hypothetical protein VIGAN_02326400 [Vigna angularis var. angularis] 6.3e-16	-	pfam00005, ABC_tran, ABC transporter. ABC transporters for a large family of proteins responsible for translocation of a variety of compounds across biological membranes. ABC transporters are the largest family of proteins in many completely sequenced bacteria. ABC transporters are composed of two copies of this domain and two copies of a transmembrane domain pfam00664. These four domains may bel…	sp|P53049|YOR1_YEAST Oligomycin resistance ATP-dependent permease YOR1 OS=Saccharomyces cerevisiae (strain ATCC 204508 / S288c) GN=YOR1 PE=1 SV=1 2.2019e-18	tr|A0A0S3RI84|A0A0S3RI84_PHAAN Uncharacterized protein OS=Vigna angularis var. angularis GN=Vigan.02G326400 PE=4 SV=1 4.8e-16	GO:0005524, ATP binding;GO:0005886, plasma membrane;GO:0008559, xenobiotic transmembrane transporting ATPase activity;GO:0016021, integral component of membrane;GO:0042626, ATPase activity, coupled to transmembrane movement of substances;GO:0042908, xenobiotic transport	-
TRINITY_DN105638_c0_g1	GCTTCTTGCGCTACAAGTGATATTGAATTGCGATAGTCGTGGAGATTGAGAGTATTAATATCGGTGCCATTATATAGGATTCGTCCTGATTGACAACGATAGAAACGCTCGAGAAGGGAGATGATGCTTGTTTTTCCCGATCCTGAGGGTCCGACTATGGCGGCGAATTGGCCGGGTTCGATGGACATGCTTAGGCCTTGCAGGACGGGGACGTCGCGG	cd03249, ABC_MTABC3_MDL1_MDL2, ATP-binding cassette domain of a mitochondrial protein MTABC3 and related proteins. MTABC3 (also known as ABCB6) is a mitochondrial ATP-binding cassette protein involved in iron homeostasis and one of four ABC transporters expressed in the mitochondrial inner membrane, the other three being MDL1(ABC7), MDL2, and ATM1. In fact, the yeast MDL1 (multidrug resistance-li…	KOG0055, KOG0055, KOG0055, Multidrug/pheromone exporter, ABC superfamily [Secondary metabolites biosynthesis, transport and catabolism]. 1.06719e-21	gi|399529268|gb|AFP44695.1| hypothetical protein [Eragrostis tef] 8.8e-14	-	pfam00005, ABC_tran, ABC transporter. ABC transporters for a large family of proteins responsible for translocation of a variety of compounds across biological membranes. ABC transporters are the largest family of proteins in many completely sequenced bacteria. ABC transporters are composed of two copies of this domain and two copies of a transmembrane domain pfam00664. These four domains may bel…	sp|P36619|PMD1_SCHPO Leptomycin B resistance protein pmd1 OS=Schizosaccharomyces pombe (strain 972 / ATCC 24843) GN=pmd1 PE=3 SV=2 4.84825e-20	tr|J9QJ10|J9QJ10_ERATE Uncharacterized protein OS=Eragrostis tef PE=4 SV=1 6.7e-14	GO:0005524, ATP binding;GO:0005773, vacuole;GO:0005886, plasma membrane;GO:0006855, drug transmembrane transport;GO:0016021, integral component of membrane;GO:0042626, ATPase activity, coupled to transmembrane movement of substances;GO:0046677, response to antibiotic	-
TRINITY_DN104782_c0_g1	GTAAAAGCTTCCTGGATGTGCTGTTCCGTCTCCGTATCTAGAGCGGCAGTGGCTTCGTCCAGCATGATGATGCGGGGGTTCTTGAGAATGGTGCGAGCGATGGCGACTCGTTGCTTCTCGCCTCCAGAAAGACGCAGACCTCGCTCTCCGACCTTAGTCTCGTATTTGTCGGGGAAAGTCATAATCTTGTCGTGGATACTTGCTGCTCGGCATGCCGCATATACCTCCTCGTCCGTTGCATTGGGGTTTGCATACTTGAGATTGTACATGATAGACTCGTTGAACAAAACGGTATCCTGGGGAACAACACCAATATGTCGACGCACAGAATCAATGGTGAGATCTTCCACATCATGCCCGTCAACCTGGATGCTACCAGACATAGTGTTATAAAATCGG…	cd03253, ABCC_ATM1_transporter, ATP-binding cassette domain of iron-sulfur clusters transporter, subfamily C. ATM1 is an ABC transporter that is expressed in the mitochondria. Although the specific function of ATM1 is unknown, its disruption results in the accumulation of excess mitochondrial iron, loss of mitochondrial cytochromes, oxidative damage to mitochondrial DNA, and decreased levels of c…	KOG0056, KOG0056, KOG0056, Heavy metal exporter HMT1, ABC superfamily [Inorganic ion transport and metabolism]. 5.80026e-74	gi|595844149|ref|XP_007208754.1| hypothetical protein PRUPE_ppa002114m1g, partial [Prunus persica] 1.1e-51	gi|615407000|ref|XM_007582133.1| Neofusicoccum parvum UCRNP2 putative vacuolar abc heavy metal transporter protein mRNA 1.77788e-73	pfam00005, ABC_tran, ABC transporter. ABC transporters for a large family of proteins responsible for translocation of a variety of compounds across biological membranes. ABC transporters are the largest family of proteins in many completely sequenced bacteria. ABC transporters are composed of two copies of this domain and two copies of a transmembrane domain pfam00664. These four domains may bel…	sp|Q02592|HMT1_SCHPO Heavy metal tolerance protein OS=Schizosaccharomyces pombe (strain 972 / ATCC 24843) GN=hmt1 PE=2 SV=3 1.68791e-72	tr|A0A140B4A5|A0A140B4A5_PRUPE ABC transporter 34 OS=Prunus persica var. persica GN=ATM3 PE=2 SV=1 8.7e-52	GO:0000329, fungal-type vacuole membrane;GO:0005524, ATP binding;GO:0005743, mitochondrial inner membrane;GO:0005773, vacuole;GO:0006879, cellular iron ion homeostasis;GO:0016021, integral component of membrane;GO:0036246, phytochelatin 2 import into vacuole;GO:0036249, cadmium ion import into vacuole;GO:0042626, ATPase activity, coupled to transmembrane movement of substances;GO:0044604, phytoch…	-
TRINITY_DN102046_c0_g1	ATTTGAGCGTGTTGGACAACGTTGCGCTGGGCCTGGAACTGCCGCGCTCGGCACTGCTGGGACGCTTGTTTGGCAAGGCCAAGAAAGACGCGCGGGAACAGGCCGCCGCCCTGCTGCACAAAGTCGGCCTTGGCCACGCCCTGGACAAATACCCGGCGCAGCTCTCTGGCGGTATGCAGCAACGCCTGGCCATCGCCCAGGCCCTGATCATGAAACCGCG	COG1116, TauB, ABC-type nitrate/sulfonate/bicarbonate transport system, ATPase component [Inorganic ion transport and metabolism]. 3.45073e-17	-	gi|870759886|gb|KMS64966.1| hypothetical protein BVRB_040810, partial [Beta vulgaris subsp. vulgaris] 8.9e-06	gi|566060467|gb|CP006852.1| Pseudomonas sp. TKP, complete genome 1.52874e-55	pfam00005, ABC_tran, ABC transporter. ABC transporters for a large family of proteins responsible for translocation of a variety of compounds across biological membranes. ABC transporters are the largest family of proteins in many completely sequenced bacteria. ABC transporters are composed of two copies of this domain and two copies of a transmembrane domain pfam00664. These four domains may bel…	sp|Q31GF5|LOLD_THICR Lipoprotein-releasing system ATP-binding protein LolD OS=Thiomicrospira crunogena (strain XCL-2) GN=lolD PE=3 SV=1 2.77653e-12	tr|B9T9V5|B9T9V5_RICCO ATP binding cassette (Abc) transporter, putative OS=Ricinus communis GN=RCOM_0334580 PE=4 SV=1 6.8e-06	GO:0005524, ATP binding;GO:0015408, ferric-transporting ATPase activity;GO:0016887, ATPase activity;GO:0042954, lipoprotein transporter activity;GO:0043190, ATP-binding cassette (ABC) transporter complex	-

## Sheet: Sheet2
TRINITY_DN99045_c1_g2	CTGAGCAGAATGACTTTTTGGTGGTTGAACCCAATTTTGAAGAAGGGCAAACTCAAAGTTTTGGAGGACAGTGATCTTCCAAAATTACAGCCTGCAGATTGTGCGGACAAGTGTTACTCCTTGTTTATGGAGCAGCTGTCAGCACAGGCGAAGAAAGGATCTTCTGGATCTCTTCCATTTTTATCAACTATATTTATTTGGCAGCGTAAAGCTATCTTACAGTCAGGTATTTTTGCATTGAGCAAGGTACTTGCACTAGCTACTGGCCCCCTGCTACTAAAAGCTTTTATACGGGTTGCTCAAGGGAAGGAAGCATTTAAATATGAGGGATATGCACTAGCTGCAGGCCTATTTTTTGTCAAATTTTTGGAATCACTCTCAGAAAGACAATGGAACTTC…	TIGR00957, Multidrug_resistance-associated_protein_1, multi drug resistance-associated protein (MRP). This model describes multi drug resistance-associated protein (MRP) in eukaryotes. The multidrug resistance-associated protein is an integral membrane protein that causes multidrug resistance when overexpressed in mammalian cells. It belongs to ABC transporter superfamily. The protein topology an…	KOG0054, KOG0054, KOG0054, Multidrug resistance-associated protein/mitoxantrone resistance protein, ABC superfamily [Secondary metabolites biosynthesis, transport and catabolism]. 1.86795e-121	gi|731378104|ref|XP_010658759.1| PREDICTED: ABC transporter C family member 10-like isoform X2 [Vitis vinifera] 5.3e-224	gi|219817013|gb|FJ148077.1| Daucus carota subsp. sativus clone BAC C145E02 genomic sequence 1.04226e-130	pfam00005, ABC_tran, ABC transporter. ABC transporters for a large family of proteins responsible for translocation of a variety of compounds across biological membranes. ABC transporters are the largest family of proteins in many completely sequenced bacteria. ABC transporters are composed of two copies of this domain and two copies of a transmembrane domain pfam00664. These four domains may bel…	sp|Q9LYS2|AB10C_ARATH ABC transporter C family member 10 OS=Arabidopsis thaliana GN=ABCC10 PE=2 SV=2 0.0	tr|F6HUR1|F6HUR1_VITVI Putative uncharacterized protein OS=Vitis vinifera GN=VIT_02s0025g00950 PE=4 SV=1 4.1e-224	GO:0005524, ATP binding;GO:0005774, vacuolar membrane;GO:0008559, xenobiotic transmembrane transporting ATPase activity;GO:0016021, integral component of membrane;GO:0042626, ATPase activity, coupled to transmembrane movement of substances	-
TRINITY_DN99041_c5_g1	CTTTCCTAAGCCAACTGAGTTGACACCACCGCTTATGCAACTAATTGAAGTAACCTTCAGTTATCCCAACAGGGAGGATTTCAGACTCTGTGACGTAGATGTTGGTATCGATATGGGTACACGTGTTGCTATTGTTGGGCCTAATGGGGCTGGGAAATCTACATTGCTTAATCTGCTTGCTGGGGATTTGGTTCCAAGCGAGGGTCAAGTGCGAAGGAGTCAAAAGTTGAGAGTTGGGAGATATTCACAGCACTTTGTTGATCTCCTGACAGTGGAGGAAACTCCTGTTGAGTATCTTCTTCGTCTTCATCCAGATCAAGAAGGATTTAGTAAACAAGAGGCTGTGCGTGCTAAACTTGGGAAATATGGGCTTCCTAGCCATAATCACCTTATCCCAAT…	PLN03073, PLN03073, ABC transporter F family; Provisional. 4.12213e-53	KOG0066, KOG0066, KOG0066, eIF2-interacting protein ABC50 (ABC superfamily) [Translation, ribosomal structure and biogenesis]. 4.57577e-63	gi|1021033531|gb|KZM91315.1| hypothetical protein DCAR_021320 [Daucus carota subsp. sativus] 1.9e-127	gi|1029134387|ref|XM_016889869.1| PREDICTED: Gossypium hirsutum ABC transporter F family member 4-like (LOC107954333), mRNA 4.45886e-167	pfam00005, ABC_tran, ABC transporter. ABC transporters for a large family of proteins responsible for translocation of a variety of compounds across biological membranes. ABC transporters are the largest family of proteins in many completely sequenced bacteria. ABC transporters are composed of two copies of this domain and two copies of a transmembrane domain pfam00664. These four domains may bel…	sp|Q9M1H3|AB4F_ARATH ABC transporter F family member 4 OS=Arabidopsis thaliana GN=ABCF4 PE=2 SV=1 2.69574e-141	tr|A0A0A0LNE5|A0A0A0LNE5_CUCSA Uncharacterized protein OS=Cucumis sativus GN=Csa_2G431120 PE=4 SV=1 1.2e-124	GO:0005215, transporter activity;GO:0005524, ATP binding;GO:0016887, ATPase activity	-
TRINITY_DN98925_c13_g3	TCCAAATACTCAACCATGTGCTGCTGAGAACTCGTAAAACTTCTGTTGAGACATAACACATGAAGAGTATCATAACTACCCACAACCCTCCTAATGCATTTTTATACCTTGCCAAGACTTTCAAACTGACAACTCCTGTTTCCCTTTCCTCCTGCTTAATAAGTATCGATTTCCCTTCTTTAGTTTTCTTTGCCTGGATTCCATCTTTAGGAAAATCATTCGTCACACCATTAACAACAGGTTTCGGAGTTTTGCTATCCTTGTCTATGCCTTCTTCCTCTTCTTCCACATATTCTTCCATTTTTCCCGCATTTTCCATCAGTTTTTGGAACAATATGCCATTGTTTGACAATTCCTCATAAGTTCCTTCCTCTTTTACCATGCCATCATGGACAAGAA…	PLN03130, PLN03130, ABC transporter C family member; Provisional. 0.0	KOG0054, KOG0054, KOG0054, Multidrug resistance-associated protein/mitoxantrone resistance protein, ABC superfamily [Secondary metabolites biosynthesis, transport and catabolism]. 5.70416e-138	gi|470108555|ref|XP_004290581.1| PREDICTED: ABC transporter C family member 2-like [Fragaria vesca subsp. vesca] 3.7e-243	gi|764533689|ref|XM_004290533.2| PREDICTED: Fragaria vesca subsp. vesca ABC transporter C family member 2-like (LOC101290712), mRNA 0.0	pfam00005, ABC_tran, ABC transporter. ABC transporters for a large family of proteins responsible for translocation of a variety of compounds across biological membranes. ABC transporters are the largest family of proteins in many completely sequenced bacteria. ABC transporters are composed of two copies of this domain and two copies of a transmembrane domain pfam00664. These four domains may bel…	sp|Q42093|AB2C_ARATH ABC transporter C family member 2 OS=Arabidopsis thaliana GN=ABCC2 PE=1 SV=2 0.0	tr|B9SKU0|B9SKU0_RICCO Mgatp-energized glutathione s-conjugate pump, putative OS=Ricinus communis GN=RCOM_1092320 PE=4 SV=1 1.4e-242	GO:0000325, plant-type vacuole;GO:0005524, ATP binding;GO:0005773, vacuole;GO:0005774, vacuolar membrane;GO:0008559, xenobiotic transmembrane transporting ATPase activity;GO:0016021, integral component of membrane;GO:0032440, 2-alkenal reductase [NAD(P)] activity;GO:0042626, ATPase activity, coupled to transmembrane movement of substances;GO:1902417, (+)-abscisic acid D-glucopyranosyl ester trans…	-
TRINITY_DN98579_c2_g1	AGAGGCCTTGTCAAGTGCTTCCTGTACAACACGTTCAGACTCGGAGTCCAAAGCACTGGTGGCCTCGTCTAGAAGTAGGATACGGGGTGCTTTTATAATTGCTCGAGCTATTGCTATTCTTTGCTTTTGTCCTCCTGACATTTGTACACCCCTTTCCCCTACCTGGGTATCATAACCCTGAGGCAACTGACTAATGAAGTTATGAGCATTTGCAGCTTTGGCCGCCCCAATAACCTCCTCCATACTTCCATCTTCTTTGCCAAAAAGTATGTTCTCTTTTATTGTTGTTGCAAATAATGCTGGCTCCTGACTCACCAATCCCATTTGTGACCTCAGCCATTTCAACTGCAACTTCTCTATGCCTACTCCATCCACCAATATTTCTCCCCCAACTGGATC…	cd03249, ABC_MTABC3_MDL1_MDL2, ATP-binding cassette domain of a mitochondrial protein MTABC3 and related proteins. MTABC3 (also known as ABCB6) is a mitochondrial ATP-binding cassette protein involved in iron homeostasis and one of four ABC transporters expressed in the mitochondrial inner membrane, the other three being MDL1(ABC7), MDL2, and ATM1. In fact, the yeast MDL1 (multidrug resistance-li…	KOG0055, KOG0055, KOG0055, Multidrug/pheromone exporter, ABC superfamily [Secondary metabolites biosynthesis, transport and catabolism]. 1.18732e-74	gi|1021044645|gb|KZN02426.1| hypothetical protein DCAR_011180 [Daucus carota subsp. sativus] 1.8e-113	gi|325977000|gb|HQ917533.1| Hevea brasiliensis isolate Reyan 7-33-97 multidrug/pheromone exporter protein mRNA, complete cds 3.88366e-131	pfam00664, ABC_membrane, ABC transporter transmembrane region. This family represents a unit of six transmembrane helices. Many members of the ABC transporter family (pfam00005) have two such regions. 1.14822e-11	sp|Q9LSJ5|AB18B_ARATH ABC transporter B family member 18 OS=Arabidopsis thaliana GN=ABCB18 PE=3 SV=1 1.22914e-105	tr|F6HV62|F6HV62_VITVI Putative uncharacterized protein OS=Vitis vinifera GN=VIT_14s0066g02320 PE=4 SV=1 2.4e-102	GO:0005524, ATP binding;GO:0016021, integral component of membrane;GO:0042626, ATPase activity, coupled to transmembrane movement of substances;GO:0055085, transmembrane transport	-
TRINITY_DN97998_c3_g1	TTGTACGAGGAAGTCTTACGAGTTTGTTGCTTACAAAAGGATATGGAAGTTATGGAGCATGGGGACCAGACAGAGATTGGAGAGCGTGGAATCAACCTCAGTGGTGGCCAGAAGCAGCGGATACAGCTTGCTAGAGCTGTATATCAGGACTGTGATATATATCTTCTCGATGATGTCTTTAGTGCTGTTGATGCTGAAACAGGATCAGAAATATTCAAGGAATGTGTCAGGGGAGCCCTTAAAGATAAGACAGTTTTACTTGTTACCCACCAAGTTGATTTCTTGCACAATGCTGATCTCATATTGGTCATGCGAGATGGGAAGATTGTGGAGTCCGGAAGGTATGAACCACTTCTTAAAGCTGGACTGGATTTTGGTGCTCTTGTAGCTGCCCATGAA…	TIGR00957, Multidrug_resistance-associated_protein_1, multi drug resistance-associated protein (MRP). This model describes multi drug resistance-associated protein (MRP) in eukaryotes. The multidrug resistance-associated protein is an integral membrane protein that causes multidrug resistance when overexpressed in mammalian cells. It belongs to ABC transporter superfamily. The protein topology an…	KOG0054, KOG0054, KOG0054, Multidrug resistance-associated protein/mitoxantrone resistance protein, ABC superfamily [Secondary metabolites biosynthesis, transport and catabolism]. 0.0	gi|1021027719|gb|KZM85506.1| hypothetical protein DCAR_027072 [Daucus carota subsp. sativus] 0.0e+00	gi|764535684|ref|XM_004290737.2| PREDICTED: Fragaria vesca subsp. vesca ABC transporter C family member 14 (LOC101305329), transcript variant X2, mRNA 0.0	pfam00005, ABC_tran, ABC transporter. ABC transporters for a large family of proteins responsible for translocation of a variety of compounds across biological membranes. ABC transporters are the largest family of proteins in many completely sequenced bacteria. ABC transporters are composed of two copies of this domain and two copies of a transmembrane domain pfam00664. These four domains may bel…	sp|Q9LZJ5|AB14C_ARATH ABC transporter C family member 14 OS=Arabidopsis thaliana GN=ABCC14 PE=1 SV=1 0.0	tr|A0A0J8B7U5|A0A0J8B7U5_BETVU Uncharacterized protein OS=Beta vulgaris subsp. vulgaris GN=BVRB_003010 PE=4 SV=1 0.0e+00	GO:0000325, plant-type vacuole;GO:0005524, ATP binding;GO:0005773, vacuole;GO:0005774, vacuolar membrane;GO:0005794, Golgi apparatus;GO:0008559, xenobiotic transmembrane transporting ATPase activity;GO:0016021, integral component of membrane;GO:0042626, ATPase activity, coupled to transmembrane movement of substances	K05666-ko02010 ABC transporters;ko04976 Bile secretion
TRINITY_DN97936_c1_g1	TGCACCAATTGCTCCACTTGAGTTTTCAGGCTTGTCAAACCAACCCACCTCCATCCTAACAACTTTTTCAAAGCACATCAGTCTTATCCGCCTGATTAATTTACAACCAGCCACCGCAAAAAAGTAAGTCTGTGATGGATAAGCAATAAATGATGCCAACCCAAGGACAACAAACATTATCGCCCAGAATTTCGAATCCTTTTTCATTTCATGTGGGGTCTCATAAAATATCTTGATAACGCTGGCGAGTAGTATACCATAAATCGGAAGTATGACACCATTGAGGATAGCAGATATAGCTCCAATTATTAGAACTGGTAACTCAGGCTTGTTAAGATACATAAGTCGGCGCAGTGGGACTTTTTGAGTCTGTTCAGATGATTTTTCGCCAGGGCTTTC…	cd03249, ABC_MTABC3_MDL1_MDL2, ATP-binding cassette domain of a mitochondrial protein MTABC3 and related proteins. MTABC3 (also known as ABCB6) is a mitochondrial ATP-binding cassette protein involved in iron homeostasis and one of four ABC transporters expressed in the mitochondrial inner membrane, the other three being MDL1(ABC7), MDL2, and ATM1. In fact, the yeast MDL1 (multidrug resistance-li…	KOG0055, KOG0055, KOG0055, Multidrug/pheromone exporter, ABC superfamily [Secondary metabolites biosynthesis, transport and catabolism]. 0.0	gi|1021047102|gb|KZN04882.1| hypothetical protein DCAR_005719 [Daucus carota subsp. sativus] 0.0e+00	gi|731395942|ref|XM_010654038.1| PREDICTED: Vitis vinifera ABC transporter B family member 11 (LOC100267452), transcript variant X2, mRNA 0.0	pfam00664, ABC_membrane, ABC transporter transmembrane region. This family represents a unit of six transmembrane helices. Many members of the ABC transporter family (pfam00005) have two such regions. 8.41382e-35	sp|O80725|AB4B_ARATH ABC transporter B family member 4 OS=Arabidopsis thaliana GN=ABCB4 PE=1 SV=1 0.0	tr|F6HZG2|F6HZG2_VITVI Putative uncharacterized protein OS=Vitis vinifera GN=VIT_07s0005g02660 PE=4 SV=1 1.8e-298	GO:0005524, ATP binding;GO:0005886, plasma membrane;GO:0008559, xenobiotic transmembrane transporting ATPase activity;GO:0009506, plasmodesma;GO:0009630, gravitropism;GO:0009733, response to auxin;GO:0009734, auxin-activated signaling pathway;GO:0009735, response to cytokinin;GO:0009926, auxin polar transport;GO:0010315, auxin efflux;GO:0010328, auxin influx transmembrane transporter activity;GO:…	K05658-ko04976 Bile secretion;ko02010 ABC transporters
TRINITY_DN97936_c0_g3	TGATGCAGAATCTGAGAGAATTGTGCAAGAGGCATCGGACAGGATCATGGTTCAGAACCACTGTCATTGTGGCACATCGCTTGAGCACAGTGATAAAGGCTGATATGATTGCAGTGATCAATCAGGGGAAGATGGTTGAAAAAGGCACCATGTTGAATTACTCGAAAATATTGAAGGGCCATACTCCCAGCTTATTAAATTGCAGGCGTTGGCGACAGCGACAAGACAGACATTGGTACAGGAAGTGGTAGAGCTTTAAGTCAAAGGATGTACATTCCATCAGTAGGGTATCTTCTGGTGAATAGAAGCAGCCGTCTTTCACTCACCCTATCGTTTCGCTTACCCACAGGTCTTACTGAAATCACAATAGGAGAACCTAAACCTAAACCTGAACGTGAA…	pfam00664, ABC_membrane, ABC transporter transmembrane region. This family represents a unit of six transmembrane helices. Many members of the ABC transporter family (pfam00005) have two such regions. 5.62809e-18	KOG0055, KOG0055, KOG0055, Multidrug/pheromone exporter, ABC superfamily [Secondary metabolites biosynthesis, transport and catabolism]. 3.5368e-52	gi|1021045762|gb|KZN03543.1| hypothetical protein DCAR_012299 [Daucus carota subsp. sativus] 7.3e-150	gi|731395942|ref|XM_010654038.1| PREDICTED: Vitis vinifera ABC transporter B family member 11 (LOC100267452), transcript variant X2, mRNA 1.21839e-79	pfam00664, ABC_membrane, ABC transporter transmembrane region. This family represents a unit of six transmembrane helices. Many members of the ABC transporter family (pfam00005) have two such regions. 1.3446e-18	sp|O80725|AB4B_ARATH ABC transporter B family member 4 OS=Arabidopsis thaliana GN=ABCB4 PE=1 SV=1 5.84746e-115	tr|U5GLS5|U5GLS5_POPTR Uncharacterized protein OS=Populus trichocarpa GN=POPTR_0002s18860g PE=4 SV=1 7.4e-110	GO:0005524, ATP binding;GO:0005886, plasma membrane;GO:0008559, xenobiotic transmembrane transporting ATPase activity;GO:0009506, plasmodesma;GO:0009630, gravitropism;GO:0009733, response to auxin;GO:0009734, auxin-activated signaling pathway;GO:0009735, response to cytokinin;GO:0009926, auxin polar transport;GO:0010315, auxin efflux;GO:0010328, auxin influx transmembrane transporter activity;GO:…	-
TRINITY_DN97799_c3_g1	GCATTCAACGCCAAAGTAAACACCAAGCTTTCCCCCTCCGTCACTTTACCTTCCCATGCCTCTCTCCCCCTTTATCTCTCTCTCTCTCTCTAAAAGTGTAAAACTCTAGTGATTAATTAGGGTTTTGTAGAGGGAACTAGAAGAAGATGAGGTCTTCTGGACGACAGTTGAAGGCCATGCTTCGCAAGAACTGGCTTCTCAAAATTCGTCATCCTTTTGTTACTTTTGCTGAGATCATGCTTCCAACTATTATAATGCTGATGTTAATAGCTGTGAGGACTCAAGTGGATACACAGATCCACCCGGCTCAGTCGTATATTAAAAAGGAATTGTTTATTGAAGTTGGAAAAGATGATGCATCCCCTAGTTTCAATCAAGTTTTAGAACTTCTGTTGGCCA…	TIGR01257, Retinal-specific_ATP-binding_cassette_transporter, retinal-specific rim ABC transporter. This model describes the photoreceptor protein (rim protein) in eukaryotes. It is the member of ABC transporter superfamily. Rim protein is a membrane glycoprotein which is localized in the photoreceptor outer segment discs. Mutation/s in its genetic loci is implicated in the recessive Stargardt's …	KOG0059, KOG0059, KOG0059, Lipid exporter ABCA1 and related proteins, ABC superfamily [Lipid transport and metabolism, General function prediction only]. 5.89843e-74	gi|1021034357|gb|KZM92141.1| hypothetical protein DCAR_020494 [Daucus carota subsp. sativus] 0.0e+00	gi|731399847|ref|XM_010655465.1| PREDICTED: Vitis vinifera ABC transporter A family member 1 (LOC100265905), transcript variant X2, mRNA 0.0	pfam00005, ABC_tran, ABC transporter. ABC transporters for a large family of proteins responsible for translocation of a variety of compounds across biological membranes. ABC transporters are the largest family of proteins in many completely sequenced bacteria. ABC transporters are composed of two copies of this domain and two copies of a transmembrane domain pfam00664. These four domains may bel…	sp|Q84M24|AB1A_ARATH ABC transporter A family member 1 OS=Arabidopsis thaliana GN=ABCA1 PE=2 SV=2 0.0	tr|F6HKV8|F6HKV8_VITVI Putative uncharacterized protein OS=Vitis vinifera GN=VIT_08s0007g08730 PE=4 SV=1 0.0e+00	GO:0005524, ATP binding;GO:0005774, vacuolar membrane;GO:0006869, lipid transport;GO:0016021, integral component of membrane;GO:0042626, ATPase activity, coupled to transmembrane movement of substances;GO:0043231, intracellular membrane-bounded organelle	K05643-ko02010 ABC transporters
TRINITY_DN97727_c2_g1	CCGAACCTGTAAATTATGAATATTGATTTCTCCTCTTGGCGGCCAAGAAGTATCTGGCCTGTTTTCTTGTATGATAAGAGGACCTTCACTAGAAATGGTCATGTATTGAAGAATTCTCTCAACTGATATCATTTTGGTTTCCAAATGACAAAGACAGAATATCATTCCAGTCAGAATATTTTTTAAGTTGAGTCCGTAAGTTACAGCTAGCCCTGCAATTGCTGTACATAAAAATGAAACATGTAAATTAGATATACCACTACATAGGAAAACAAATAAATGATACAAGACAATAGAAAATACATACCAGGATCTATGCTATTTCTAAAGTACATTGAGAGAACCAAGAGGAAGGAATATGTAATACACGAAAATGAATCCAATCGCAACAGCAGCCAT…	TIGR00957, Multidrug_resistance-associated_protein_1, multi drug resistance-associated protein (MRP). This model describes multi drug resistance-associated protein (MRP) in eukaryotes. The multidrug resistance-associated protein is an integral membrane protein that causes multidrug resistance when overexpressed in mammalian cells. It belongs to ABC transporter superfamily. The protein topology an…	KOG0054, KOG0054, KOG0054, Multidrug resistance-associated protein/mitoxantrone resistance protein, ABC superfamily [Secondary metabolites biosynthesis, transport and catabolism]. 1.57736e-135	gi|1021039164|gb|KZM96945.1| hypothetical protein DCAR_015693 [Daucus carota subsp. sativus] 1.9e-248	gi|731335800|ref|XM_010680609.1| PREDICTED: Beta vulgaris subsp. vulgaris ABC transporter C family member 3-like (LOC104894388), mRNA 0.0	pfam00664, ABC_membrane, ABC transporter transmembrane region. This family represents a unit of six transmembrane helices. Many members of the ABC transporter family (pfam00005) have two such regions. 3.52081e-12	sp|Q9LK64|AB3C_ARATH ABC transporter C family member 3 OS=Arabidopsis thaliana GN=ABCC3 PE=1 SV=1 0.0	tr|A0A0K9R6E7|A0A0K9R6E7_SPIOL Uncharacterized protein OS=Spinacia oleracea GN=SOVF_101510 PE=4 SV=1 8.3e-244	GO:0000325, plant-type vacuole;GO:0005524, ATP binding;GO:0005773, vacuole;GO:0005774, vacuolar membrane;GO:0008559, xenobiotic transmembrane transporting ATPase activity;GO:0009506, plasmodesma;GO:0010290, chlorophyll catabolite transmembrane transporter activity;GO:0015431, glutathione S-conjugate-exporting ATPase activity;GO:0016021, integral component of membrane;GO:0042626, ATPase activity, …	-
TRINITY_DN97570_c1_g1	CATCACTGCAGTGTGAGCATGTCAAAAATTGTATAAGACCAGGATGTTGTATCACTGTACGGTTAGGATTAAATTTGCGAGGAGAACCTAATCTGATTGTCCTCATATCCACGGTGTTGATACATTGTAGAGATTATTATTCATGTCCCACAATTATTCATTCAGTGGCTTAAAAGTTAAAATGATTTAGTCACAGGATTACAGTATATATTGGTTCATCAGCTAAGTAATACTCCTCCATCAGTTTCTCTCTGCACATAACTCTATTGCTGCTTAAAGAGTAACCAGTTAGAAGTTACATGGATTCTTCAGATAAAGTATCTAGATGGGCTCCTCTAGTGAGTCCAACAAGATCAATTCTCACGAAATTCATGACTTCGGAGAGAACTAATCAATCCG…	TIGR00955, Protein_white, The Eye Pigment Precursor Transporter (EPP) Family protein. [Transport and binding proteins, Other]. 1.16968e-60	KOG0061, KOG0061, KOG0061, Transporter, ABC superfamily (Breast cancer resistance protein) [Secondary metabolites biosynthesis, transport and catabolism]. 7.63034e-71	gi|359497155|ref|XP_003635438.1| PREDICTED: ABC transporter G family member 11-like [Vitis vinifera] 5.2e-157	gi|1025078763|ref|XM_016598495.1| PREDICTED: Nicotiana tabacum ABC transporter G family member 11-like (LOC107778271), mRNA 2.64851e-141	pfam00005, ABC_tran, ABC transporter. ABC transporters for a large family of proteins responsible for translocation of a variety of compounds across biological membranes. ABC transporters are the largest family of proteins in many completely sequenced bacteria. ABC transporters are composed of two copies of this domain and two copies of a transmembrane domain pfam00664. These four domains may bel…	sp|Q8RXN0|AB11G_ARATH ABC transporter G family member 11 OS=Arabidopsis thaliana GN=ABCG11 PE=1 SV=1 2.94353e-123	tr|F6HD74|F6HD74_VITVI Putative uncharacterized protein OS=Vitis vinifera GN=VIT_00s0625g00020 PE=4 SV=1 4.0e-157	GO:0005524, ATP binding;GO:0005886, plasma membrane;GO:0009611, response to wounding;GO:0009651, response to salt stress;GO:0009737, response to abscisic acid;GO:0009897, external side of plasma membrane;GO:0010222, stem vascular tissue pattern formation;GO:0010588, cotyledon vascular tissue pattern formation;GO:0015245, fatty acid transmembrane transporter activity;GO:0015908, fatty acid transpo…	-
TRINITY_DN97409_c1_g1	TTCACAAAAATACCGAAATTTTTTAAAGCACTTTTAAAAATACTACTAAAATACTAAAATATGAGGTTGCAAATATTGCATTTGGGTTGTAACGGTTATAAATGTTGCGTTGGTCGCAAGGTGGAAACTTTATTTGTAATTAAGTAAAACTACTACGGATCGGACGAACTAAAATTTTGAGTGTTTCCGCTAGTATAGATTTTCACTTCCAATCAATCGTCTATGCAGAGATGATGTTAGAAGATATGCTTGTAAGCTGCAAAACTAATGCGAAAGTCTGTTATAAAACTTCCATTTCCTTTTCGTTCCATTTTGTTGGTTATACTCCATATTTTTCAATGGTGCATATCACATTGCCTTGTGTAGTTTATAGGCAAGCACCTCTACATGCAATATAAA…	COG1132, MdlB, ABC-type multidrug transport system, ATPase and permease components [Defense mechanisms]. 1.82909e-92	KOG0055, KOG0055, KOG0055, Multidrug/pheromone exporter, ABC superfamily [Secondary metabolites biosynthesis, transport and catabolism]. 0.0	gi|1021048097|gb|KZN05877.1| hypothetical protein DCAR_006714 [Daucus carota subsp. sativus] 0.0e+00	gi|747100878|ref|XM_011100244.1| PREDICTED: Sesamum indicum ABC transporter B family member 15-like (LOC105177189), mRNA 0.0	pfam00664, ABC_membrane, ABC transporter transmembrane region. This family represents a unit of six transmembrane helices. Many members of the ABC transporter family (pfam00005) have two such regions. 1.85465e-22	sp|Q6YUU5|MDR_ORYSJ Putative multidrug resistance protein OS=Oryza sativa subsp. japonica GN=Os02g0190300 PE=3 SV=1 0.0	tr|K4BBP8|K4BBP8_SOLLC Uncharacterized protein OS=Solanum lycopersicum PE=4 SV=1 0.0e+00	GO:0005524, ATP binding;GO:0016021, integral component of membrane;GO:0042626, ATPase activity, coupled to transmembrane movement of substances;GO:0055085, transmembrane transport	K05658-ko04976 Bile secretion;ko02010 ABC transporters
TRINITY_DN96988_c1_g4	TAGGACTTGTACTGGGGTTCTCTGTTCTCATCCTCTTTCCAGAGATATTCGTATAGAGTCTCTGTCTCTAACCTTCCATGGACATGATCTTATTGTTGATTCTGAGCTGGAGCTTAATTATGGCAGACGGTATGGTTTGCTCGGACTTAATGGCTGTGGAAAATCTACTCTACTTACCTCCATAGGGCGTCGAGAACTTCCAATTCCTGATCACATGGATATTTTTCATCTGACAAGGGAGATTGAAGCATCTGATATGTCTTCACTCCAGGCCGTGATGAACTGTGATGAGGAGAAGATAAAATTAGAGAAAGAAGCTGAAGCTTTGGCTGCTCAGGATGACGGTGGAGGAGAAGCTCTTGAGCGCATTTACGAGCGTTTGGATGCAATGGATGCAGC…	PLN03073, PLN03073, ABC transporter F family; Provisional. 1.24151e-95	KOG0927, KOG0927, KOG0927, Predicted transporter (ABC superfamily) [General function prediction only]. 7.82425e-169	gi|1021026571|gb|KZM84358.1| hypothetical protein DCAR_028348 [Daucus carota subsp. sativus] 1.9e-203	gi|590590815|ref|XM_007016780.1| Theobroma cacao ABC transporter F family member 1 (TCM_042138) mRNA, complete cds 0.0	pfam12848, ABC_tran_Xtn, ABC transporter. This domain is an extension of some members of pfam00005 and other ABC-transporter families. 1.48504e-08	sp|Q9FJH6|AB1F_ARATH ABC transporter F family member 1 OS=Arabidopsis thaliana GN=ABCF1 PE=1 SV=1 0.0	tr|A0A103XH96|A0A103XH96_CYNCS AAA+ ATPase domain-containing protein OS=Cynara cardunculus var. scolymus GN=Ccrd_007233 PE=4 SV=1 3.3e-195	GO:0005215, transporter activity;GO:0005524, ATP binding;GO:0005886, plasma membrane;GO:0016887, ATPase activity	-
TRINITY_DN96811_c2_g1	AAAAAAAGTTAGATTACTACTGTGTGCGTGTCCCCTGTAATTTTGCCTGTAAAAAATGTCCAAACCCACAATTCTATGTTGTCCACCATGAAAACATCATCAACTAAATTACTAAATGTAAATAGAAAGGTAGAGATTGATCAAAGTACAACTACTTGATGGCAACATCTTTACTACCTTTCCAAACCAAAACTCACCCTGTGTATCCCAATTTAGCAATACAATCCCCAAATAATTTAACCCCAAGAAGCAACCCCAAGTTTCAGTTTCCACCAACAATCCTCCTCAACACCAAACACAAGTGTTTCTTTAGTTCAGATGTAGTAGCTTTGAGTTACGTTTCGAAACGGAGTACCCCAAGTAATGGGGACAGGGAAGAAAATGATTTTCAGTTGGTAA…	TIGR00958, Antigen_peptide_transporter_2, Conjugate Transporter-2 (CT2) Family protein. [Transport and binding proteins, Other]. 4.31428e-73	KOG0058, KOG0058, KOG0058, Peptide exporter, ABC superfamily [Intracellular trafficking, secretion, and vesicular transport]. 6.53594e-88	gi|1021044719|gb|KZN02500.1| hypothetical protein DCAR_011254 [Daucus carota subsp. sativus] 2.8e-195	gi|955319291|ref|XM_003525390.3| PREDICTED: Glycine max ABC transporter B family member 25-like (LOC100818615), mRNA 1.50434e-11	pfam00664, ABC_membrane, ABC transporter transmembrane region. This family represents a unit of six transmembrane helices. Many members of the ABC transporter family (pfam00005) have two such regions. 4.61653e-13	sp|Q8RY46|AB26B_ARATH ABC transporter B family member 26, chloroplastic OS=Arabidopsis thaliana GN=ABCB26 PE=2 SV=1 0.0	tr|M5WYG2|M5WYG2_PRUPE Uncharacterized protein OS=Prunus persica GN=PRUPE_ppa002672mg PE=4 SV=1 4.3e-156	GO:0005215, transporter activity;GO:0005524, ATP binding;GO:0009507, chloroplast;GO:0009941, chloroplast envelope;GO:0016021, integral component of membrane;GO:0031969, chloroplast membrane;GO:0042626, ATPase activity, coupled to transmembrane movement of substances	K05656-ko02010 ABC transporters;ko04142 Lysosome
TRINITY_DN96499_c0_g1	GTGCTCTAACTCGTGATATTGAGATGTGGGCTGATGGAGATTTAAGTGTGGTGGGAGAGAGGGGTATGAACTTAAGTGGCGGACAGAAGCAAAGGATTCAGTTGGCAAGAGCAATTTACAGCGACTCAGATGTGTATTTCTTAGATGACCCTTTTAGTGCTGTGGATGCACATACAGGAGCTCATATGTTCAAGAAATGTATGATGGAATTACTAAATACGAAGACAGTTATTTATGTGACACATCAGTTGGAATTTCTTGAAGGTTCAGACCTTGTATTGGTTATGAAGAATGGTAGCATTGTTCAGTCAGGAAAGTACAAAGATTTAATTGCAGAAACTACTGGCGAACTTGTAACACAAATGGCTGCGCATAGCAAATCTCTAAATCAAGTTAAAC…	PLN03130, PLN03130, ABC transporter C family member; Provisional. 4.2691e-126	KOG0054, KOG0054, KOG0054, Multidrug resistance-associated protein/mitoxantrone resistance protein, ABC superfamily [Secondary metabolites biosynthesis, transport and catabolism]. 2.68124e-137	gi|1021029161|gb|KZM86946.1| hypothetical protein DCAR_024080 [Daucus carota subsp. sativus] 0.0e+00	gi|698508494|ref|XM_009801211.1| PREDICTED: Nicotiana sylvestris putative ABC transporter C family member 15 (LOC104245588), transcript variant X2, mRNA 0.0	pfam00005, ABC_tran, ABC transporter. ABC transporters for a large family of proteins responsible for translocation of a variety of compounds across biological membranes. ABC transporters are the largest family of proteins in many completely sequenced bacteria. ABC transporters are composed of two copies of this domain and two copies of a transmembrane domain pfam00664. These four domains may bel…	sp|Q9LK64|AB3C_ARATH ABC transporter C family member 3 OS=Arabidopsis thaliana GN=ABCC3 PE=1 SV=1 0.0	tr|B9HTC0|B9HTC0_POPTR Uncharacterized protein OS=Populus trichocarpa GN=POPTR_0010s06540g PE=4 SV=2 2.2e-272	GO:0000325, plant-type vacuole;GO:0005524, ATP binding;GO:0005773, vacuole;GO:0005774, vacuolar membrane;GO:0008559, xenobiotic transmembrane transporting ATPase activity;GO:0009506, plasmodesma;GO:0010290, chlorophyll catabolite transmembrane transporter activity;GO:0015431, glutathione S-conjugate-exporting ATPase activity;GO:0016021, integral component of membrane;GO:0042626, ATPase activity, …	K05666-ko02010 ABC transporters;ko04976 Bile secretion
TRINITY_DN96361_c1_g2	CACTTTGTGTCCAAATCTTTAAGAGGATAACCATCAATCAAAATCTGACCACTTGTTGGCTCATATAGTCGAAGCAAAAGATTCACAAGAGTGCTTTTCCCACTTCCACTTAGACCAACAATTGCAACAACTTCATTAGGATGCACCACGAGATTTATATGTTGCAGTACAGAAACCGTTTCTCTCGAAGAATAGTAAAAACAAATATCCTTAAACTCAATGCGACCATTGAGTTTTTCCAACTTCAATCCTTGATGCGTGAACTGGTCACTGGGCGAAAGGTCCATCAACTGAAACACTTTTTCACTAGCCCCAACAGATTGCATCAGCGATGACACATTGTCTCCCACCCACCAAGTTGAATAAATCAACCATTCACTGTACAGTATGAATTTTGTA…	TIGR00958, Antigen_peptide_transporter_2, Conjugate Transporter-2 (CT2) Family protein. [Transport and binding proteins, Other]. 7.29403e-52	KOG0058, KOG0058, KOG0058, Peptide exporter, ABC superfamily [Intracellular trafficking, secretion, and vesicular transport]. 3.06756e-69	gi|1021025795|gb|KZM83583.1| hypothetical protein DCAR_031152 [Daucus carota subsp. sativus] 1.8e-148	gi|731436758|ref|XM_010648461.1| PREDICTED: Vitis vinifera ABC transporter B family member 26, chloroplastic-like (LOC100249410), transcript variant X3, mRNA 1.31875e-161	pfam00664, ABC_membrane, ABC transporter transmembrane region. This family represents a unit of six transmembrane helices. Many members of the ABC transporter family (pfam00005) have two such regions. 3.26341e-14	sp|Q8RY46|AB26B_ARATH ABC transporter B family member 26, chloroplastic OS=Arabidopsis thaliana GN=ABCB26 PE=2 SV=1 5.07418e-157	tr|F6GZ17|F6GZ17_VITVI Putative uncharacterized protein OS=Vitis vinifera GN=VIT_00s0291g00100 PE=4 SV=1 2.1e-125	GO:0005215, transporter activity;GO:0005524, ATP binding;GO:0009507, chloroplast;GO:0009941, chloroplast envelope;GO:0016021, integral component of membrane;GO:0031969, chloroplast membrane;GO:0042626, ATPase activity, coupled to transmembrane movement of substances	K05656-ko02010 ABC transporters;ko04142 Lysosome
TRINITY_DN96033_c1_g1	GAATGTCGAGCTACACGTTAAGACTGTGGATGGTGTTACAGATTTTGATGCCCAGCAGGACCGAGAAACTATGGGTATAGAAGTAGAAACAATTTTTGTAAATCAGCAAACTACAATATAGTTAAAATAGATCCGCGGAAGCTTTGTCAGGGTTGTCATTAGCCCATCCAATCTCAATCCAATTTGAAGCGGAAGCAGAAGATACCTCCTCTAGTTTAAATCTCCTCAAGTTCCGAATGAACTGGTGCATCTTCCAAACCATTTTCGATATGCCCAAGCCTGTTTTGAGCAAGCCTACTCATTACAGCAAGACCTTCAACCACTCCATAAAGTGCTGACCACCAGTTATTTGCAGGAACCTGATATTTATCAAGAGCCTCATCAATGAGCTTGTCATGC…	PLN03130, PLN03130, ABC transporter C family member; Provisional. 0.0	KOG0054, KOG0054, KOG0054, Multidrug resistance-associated protein/mitoxantrone resistance protein, ABC superfamily [Secondary metabolites biosynthesis, transport and catabolism]. 5.60691e-120	gi|1021046233|gb|KZN04013.1| hypothetical protein DCAR_004811 [Daucus carota subsp. sativus] 1.8e-253	gi|731405247|ref|XM_010657404.1| PREDICTED: Vitis vinifera ABC transporter C family-like (LOC100251535), transcript variant X2, mRNA 0.0	pfam00005, ABC_tran, ABC transporter. ABC transporters for a large family of proteins responsible for translocation of a variety of compounds across biological membranes. ABC transporters are the largest family of proteins in many completely sequenced bacteria. ABC transporters are composed of two copies of this domain and two copies of a transmembrane domain pfam00664. These four domains may bel…	sp|Q42093|AB2C_ARATH ABC transporter C family member 2 OS=Arabidopsis thaliana GN=ABCC2 PE=1 SV=2 0.0	tr|A0A061DVW6|A0A061DVW6_THECC Multidrug resistance-associated protein 2 isoform 1 OS=Theobroma cacao GN=TCM_006080 PE=4 SV=1 6.9e-197	GO:0000325, plant-type vacuole;GO:0005524, ATP binding;GO:0005773, vacuole;GO:0005774, vacuolar membrane;GO:0008559, xenobiotic transmembrane transporting ATPase activity;GO:0016021, integral component of membrane;GO:0042626, ATPase activity, coupled to transmembrane movement of substances;GO:1902417, (+)-abscisic acid D-glucopyranosyl ester transmembrane transporter activity;GO:1902418, (+)-absc…	-
TRINITY_DN96014_c1_g1	GTTTTCACAAATTATGAAAAAAATTGATAAACTTTTTATGACAGATATAAGTCTAACCTTCAATTTCAAAGTACTTGCATCAATCTCTTACAGTATTAACTTTCAATATATAATAAAACACTTATCAAATTTTTACATGTTCTTTTTGCCGCAACAATCTTAATTGTTCCTCCTAATTAAGAAACAAATTTTAGAAATATGACGTAAGCAATTCAATATTTAAGGGTAGAGGGTAATCCAACTGACTTCATGTGAAATCTTTTGACATAAAGTAATCTAGACTTTACAATATCACATGCGCTAGCTAGCTCTTTCTACATAGAGCTAGCACAAGCCCCCTGCATAGTGATCAAACAACATCAGTTTGTGTTGCATATAGAGCTACTTAAGTAGAAGTTC…	PLN03211, PLN03211, ABC transporter G-25; Provisional. 3.4033e-106	KOG0061, KOG0061, KOG0061, Transporter, ABC superfamily (Breast cancer resistance protein) [Secondary metabolites biosynthesis, transport and catabolism]. 7.30206e-68	gi|1021034172|gb|KZM91956.1| hypothetical protein DCAR_020679 [Daucus carota subsp. sativus] 5.8e-266	gi|566209071|ref|XM_006373755.1| Populus trichocarpa hypothetical protein (POPTR_0016s06620g) mRNA, complete cds 0.0	pfam00005, ABC_tran, ABC transporter. ABC transporters for a large family of proteins responsible for translocation of a variety of compounds across biological membranes. ABC transporters are the largest family of proteins in many completely sequenced bacteria. ABC transporters are composed of two copies of this domain and two copies of a transmembrane domain pfam00664. These four domains may bel…	sp|Q93YS4|AB22G_ARATH ABC transporter G family member 22 OS=Arabidopsis thaliana GN=ABCG22 PE=1 SV=1 0.0	tr|A0A103XGX3|A0A103XGX3_CYNCS AAA+ ATPase domain-containing protein OS=Cynara cardunculus var. scolymus GN=Ccrd_007427 PE=4 SV=1 2.5e-213	GO:0005524, ATP binding;GO:0005886, plasma membrane;GO:0009414, response to water deprivation;GO:0010148, transpiration;GO:0016021, integral component of membrane;GO:0016887, ATPase activity;GO:0042626, ATPase activity, coupled to transmembrane movement of substances	-
TRINITY_DN95710_c3_g1	GTCTGTTCTAGTCAACACCCAAATTTAGTTTACAGGTAGTATTCCCTTTCATTGTTGCCCCTGTTCTCATCAACCATCACTTTCCTTCCCCTGTTCCTGTGTTTTCACACCGCTACTTCTACAGTACCACTAAAGTACACACACCCCCGGTAAAAACACAAGTAAATAAACAAACCCAACTGCAGATACAGCCTATACTTACACAACACACACATATATATACATGAACTAAGCCAGTCTAGTTAGTTTAACAAACCATCTTAAAAAAAATGGCCCAAGATCCTGAAGAAGAGAGAAAGACTAGTTTTACTAGCCCAAGAATTAGCATATCAGCAAAAAGAAAATTCTATGAGTTTCTTGGGCTTGAGCTGCCTGTTGTAGTTTCTGAACAAGATGAAC…	cd03249, ABC_MTABC3_MDL1_MDL2, ATP-binding cassette domain of a mitochondrial protein MTABC3 and related proteins. MTABC3 (also known as ABCB6) is a mitochondrial ATP-binding cassette protein involved in iron homeostasis and one of four ABC transporters expressed in the mitochondrial inner membrane, the other three being MDL1(ABC7), MDL2, and ATM1. In fact, the yeast MDL1 (multidrug resistance-li…	KOG0055, KOG0055, KOG0055, Multidrug/pheromone exporter, ABC superfamily [Secondary metabolites biosynthesis, transport and catabolism]. 0.0	gi|1021036652|gb|KZM94435.1| hypothetical protein DCAR_017678 [Daucus carota subsp. sativus] 0.0e+00	gi|590630928|ref|XM_007027357.1| Theobroma cacao ATP binding cassette subfamily B1 isoform 1 (TCM_022244) mRNA, complete cds 0.0	pfam00664, ABC_membrane, ABC transporter transmembrane region. This family represents a unit of six transmembrane helices. Many members of the ABC transporter family (pfam00005) have two such regions. 2.45832e-29	sp|Q9ZR72|AB1B_ARATH ABC transporter B family member 1 OS=Arabidopsis thaliana GN=ABCB1 PE=1 SV=1 0.0	tr|A0A103YI66|A0A103YI66_CYNCS AAA+ ATPase domain-containing protein OS=Cynara cardunculus var. scolymus GN=Ccrd_012122 PE=4 SV=1 0.0e+00	GO:0005524, ATP binding;GO:0005886, plasma membrane;GO:0008361, regulation of cell size;GO:0009506, plasmodesma;GO:0009624, response to nematode;GO:0009637, response to blue light;GO:0009639, response to red or far red light;GO:0009640, photomorphogenesis;GO:0009733, response to auxin;GO:0009734, auxin-activated signaling pathway;GO:0009926, auxin polar transport;GO:0009958, positive gravitropism…	K05658-ko04976 Bile secretion;ko02010 ABC transporters
TRINITY_DN95608_c1_g1	TTGGGGTTTGGCTCTGTTTAGTGTTGTTATTTGTTTATTGAATAACTTTTATTGGTATAGAAATGGGTGGTCTGATGTTAAGGTTTTAGTTGTTTTTGATTCAGTGAGTAAAGGGCTAACTTGGTTGGTTGTTTCAGTTTATGTTAGTACCCAATTGAAACATAGAGGTTATGTTAAGTACCCTTTAGTGCTGAGGGTCTGGTGGTGTTTTTATTTTTCGATTTCTTGTTATTGTCTTGTTCTTGATTTTGTTTTGTATGAAAACTTGTTGGTGTCTTTACAACTACAATTTGTGGTTTGTGATGCATTATATGTAGTTACAGGGTTGTTTTTGTGTTTTGTGGGGCTTATGGGTAGAAGTGAGGCTAGTGAAAATGGAATTGGAAATGGAAATGACCT…	PLN03232, PLN03232, ABC transporter C family member; Provisional. 4.07799e-156	KOG0054, KOG0054, KOG0054, Multidrug resistance-associated protein/mitoxantrone resistance protein, ABC superfamily [Secondary metabolites biosynthesis, transport and catabolism]. 0.0	gi|1021041641|gb|KZM99422.1| hypothetical protein DCAR_013216 [Daucus carota subsp. sativus] 0.0e+00	gi|568842365|ref|XM_006475057.1| PREDICTED: Citrus sinensis ABC transporter C family member 3-like (LOC102621957), mRNA 0.0	pfam00005, ABC_tran, ABC transporter. ABC transporters for a large family of proteins responsible for translocation of a variety of compounds across biological membranes. ABC transporters are the largest family of proteins in many completely sequenced bacteria. ABC transporters are composed of two copies of this domain and two copies of a transmembrane domain pfam00664. These four domains may bel…	sp|Q9LK64|AB3C_ARATH ABC transporter C family member 3 OS=Arabidopsis thaliana GN=ABCC3 PE=1 SV=1 0.0	tr|F6I530|F6I530_VITVI Putative uncharacterized protein OS=Vitis vinifera GN=VIT_19s0015g00050 PE=4 SV=1 0.0e+00	GO:0000325, plant-type vacuole;GO:0005524, ATP binding;GO:0005773, vacuole;GO:0005774, vacuolar membrane;GO:0008559, xenobiotic transmembrane transporting ATPase activity;GO:0009506, plasmodesma;GO:0010290, chlorophyll catabolite transmembrane transporter activity;GO:0015431, glutathione S-conjugate-exporting ATPase activity;GO:0016021, integral component of membrane;GO:0042626, ATPase activity, …	K05666-ko02010 ABC transporters;ko04976 Bile secretion
TRINITY_DN94728_c2_g1	GATCAAAGGATAAGAAAGGAAAGTCACTGTACAATCACAAAGTCTACTTATATTAGTCTACGCTGCCTCATACCCTTTCCAAAGTGAGGCTGCATTAACCGAACATACAATCCATTCTTCGCCATCAACATATCATGGCTCCCTTCCTCAACAATCCGTCCTCCGTTCAGTACAACGATGTTGTCAACATGTCTCATCATAGCTGCTCTATGTGCTATGAGAATGGTGGTTTTGTTACCCATGACTAGTGTATCAAGTGCCTCCTGAACAACTCGGCTTGACTCGGACTCGATAGATGAGCTTGCCTCATCCAATAACAAAATGGGAGCATTCTTTAACACAACACGAGCAATTGCAATTCTTTGTTTCTGTCCGGGGGTCAGATCCACGCCTCTCATC…	cd03249, ABC_MTABC3_MDL1_MDL2, ATP-binding cassette domain of a mitochondrial protein MTABC3 and related proteins. MTABC3 (also known as ABCB6) is a mitochondrial ATP-binding cassette protein involved in iron homeostasis and one of four ABC transporters expressed in the mitochondrial inner membrane, the other three being MDL1(ABC7), MDL2, and ATM1. In fact, the yeast MDL1 (multidrug resistance-li…	KOG0055, KOG0055, KOG0055, Multidrug/pheromone exporter, ABC superfamily [Secondary metabolites biosynthesis, transport and catabolism]. 1.52726e-157	gi|1021039642|gb|KZM97423.1| hypothetical protein DCAR_015215 [Daucus carota subsp. sativus] 0.0e+00	gi|802672861|ref|XM_012226171.1| PREDICTED: Jatropha curcas ABC transporter B family member 20 (LOC105641586), mRNA 0.0	pfam00664, ABC_membrane, ABC transporter transmembrane region. This family represents a unit of six transmembrane helices. Many members of the ABC transporter family (pfam00005) have two such regions. 5.52519e-20	sp|Q9M3B9|AB20B_ARATH ABC transporter B family member 20 OS=Arabidopsis thaliana GN=ABCB20 PE=1 SV=1 0.0	tr|A0A097P9R0|A0A097P9R0_HEVBR ABC transporter family protein OS=Hevea brasiliensis GN=ABCB20 PE=2 SV=1 0.0e+00	GO:0005524, ATP binding;GO:0005634, nucleus;GO:0005886, plasma membrane;GO:0016021, integral component of membrane;GO:0042626, ATPase activity, coupled to transmembrane movement of substances	K05658-ko04976 Bile secretion;ko02010 ABC transporters
TRINITY_DN94634_c1_g6	TACTTTAACCACGTTAGTGAAAATATATGTGACCCACACAAAAGAGTTTTAATTTTATGAATTTCCAAATGTATCATACATCTCAATGCAGAAAGTTGCTACCAACTTTGGTATCTAAGGGTAACAAATTTTTTTACTAAAGCAGTTCCATTATGTATGTGTTCTGTCATATTACTATAAAAACTCCACGGGTTTGGCACACAACACAAGATGATTGGACCAGCAAATAATATCCTAAGACTGGAGCAATTTTTTGTAATCCTGGAATGTCCCGTCAAAAGGTGTCACCCTGCCTTCAGATACAGCCCACAGCTGATCAACACTTCCAGATATCAGATGTTCATCGTGACTTACCATAAGAACTCCTCCTTGGAACAAAACAAGACCCTGGATCAATGC…	PLN03073, PLN03073, ABC transporter F family; Provisional. 0.0	KOG0062, KOG0062, KOG0062, ATPase component of ABC transporters with duplicated ATPase domains/Translation elongation factor EF-3b [Amino acid transport and metabolism, Translation, ribosomal structure and biogenesis]. 1.40494e-163	gi|1021024466|gb|KZM82254.1| hypothetical protein DCAR_029862 [Daucus carota subsp. sativus] 0.0e+00	gi|731378673|ref|XM_002263143.3| PREDICTED: Vitis vinifera ABC transporter F family member 3 (LOC100256523), mRNA 0.0	pfam12848, ABC_tran_Xtn, ABC transporter. This domain is an extension of some members of pfam00005 and other ABC-transporter families. 2.38248e-16	sp|Q8H0V6|AB3F_ARATH ABC transporter F family member 3 OS=Arabidopsis thaliana GN=ABCF3 PE=1 SV=1 0.0	tr|D7TVM3|D7TVM3_VITVI Putative uncharacterized protein OS=Vitis vinifera GN=VIT_02s0025g02160 PE=4 SV=1 0.0e+00	GO:0005215, transporter activity;GO:0005524, ATP binding;GO:0005829, cytosol;GO:0016887, ATPase activity;GO:0042742, defense response to bacterium;GO:0046686, response to cadmium ion	-
TRINITY_DN94618_c0_g1	TGTTACTTGTCCGGTGGTAATGAATGATGCATTGAAAAAAATTATTTAGTCACTATTTTACTTGTCCCATTTTCATGTGTTAGTAATTCTACATATTATGGTAATGGTAACTTTTAGACATTCAAAAGCCTATTCTGAAAATGTCCCAACATGGAGAAATACACACTTCTCTTGTTGTAAAGTATATTCGTAGTAAAATTCAGAACTTAAATTTTTTTTAGGGGAAAAAGATGAAAATAAAGCATGCGAACTTGGCGTAACTCAGGTAACTTGTCAATGAATGTTGCAGCATTGGCAATTAGCTCAATAGCCGTTCTAATCTCTTCTTCAGTAGCATTTTCCTTTCCATATGCAATATTTGATTTAATGCTAGTTGCAAACAGAATAGGTTCTTGACTC…	cd03249, ABC_MTABC3_MDL1_MDL2, ATP-binding cassette domain of a mitochondrial protein MTABC3 and related proteins. MTABC3 (also known as ABCB6) is a mitochondrial ATP-binding cassette protein involved in iron homeostasis and one of four ABC transporters expressed in the mitochondrial inner membrane, the other three being MDL1(ABC7), MDL2, and ATM1. In fact, the yeast MDL1 (multidrug resistance-li…	KOG0055, KOG0055, KOG0055, Multidrug/pheromone exporter, ABC superfamily [Secondary metabolites biosynthesis, transport and catabolism]. 3.05142e-52	gi|147796332|emb|CAN77320.1| hypothetical protein VITISV_009891 [Vitis vinifera] 3.3e-85	gi|764638986|ref|XM_004308458.2| PREDICTED: Fragaria vesca subsp. vesca ABC transporter B family member 9-like (LOC101292750), mRNA 8.42518e-66	pfam00005, ABC_tran, ABC transporter. ABC transporters for a large family of proteins responsible for translocation of a variety of compounds across biological membranes. ABC transporters are the largest family of proteins in many completely sequenced bacteria. ABC transporters are composed of two copies of this domain and two copies of a transmembrane domain pfam00664. These four domains may bel…	sp|Q9FHF1|AB7B_ARATH ABC transporter B family member 7 OS=Arabidopsis thaliana GN=ABCB7 PE=3 SV=1 9.33873e-78	tr|F6HMG1|F6HMG1_VITVI Putative uncharacterized protein OS=Vitis vinifera GN=VIT_10s0003g02550 PE=4 SV=1 1.9e-85	GO:0005524, ATP binding;GO:0005886, plasma membrane;GO:0016021, integral component of membrane;GO:0042626, ATPase activity, coupled to transmembrane movement of substances;GO:0055085, transmembrane transport	-
TRINITY_DN94350_c2_g4	GCAATTGTGAGTTCGGATCGATGTAAGCCTAAAAAGTGCAGGCAAGAATGCAAGAAGAGCTGTCCTGTTGTCAAGACTGGTAAACTTTGTATTGAAGTAACGTCCGCAGCCAAAATTGCTTATATATCTGAGGAGTTGTGCATTGGGTGCGGAATATGCGTTAAGAAATGCCCTTTTGAGGCAATTCAGATCATTAATCTTCCTAAAGATTTGGACAAAGACACAACTCACCGTTATGGCCCCAACACTTTCAAGCTACATAGGCTACCCGTTCCAAGGCCGGGGCAAGTTCTTGGCTTGGTTGGGACAAATGGTATTGGAAAGTCTACAGCTCTCAAAGTTTTAGCAGGGAAATTGAAGCCCAATCTTGGCCGTTTCAATAACCCTCCTGATTGGCAG…	COG1245, COG1245, Predicted ATPase, RNase L inhibitor (RLI) homolog [General function prediction only]. 8.27467e-161	KOG0063, KOG0063, KOG0063, RNAse L inhibitor, ABC superfamily [RNA processing and modification]. 0.0	gi|1021037982|gb|KZM95765.1| hypothetical protein DCAR_019007 [Daucus carota subsp. sativus] 3.4e-222	gi|778692687|ref|XM_011655204.1| PREDICTED: Cucumis sativus ABC transporter E family member 2 (LOC101214910), transcript variant X2, mRNA 0.0	pfam00005, ABC_tran, ABC transporter. ABC transporters for a large family of proteins responsible for translocation of a variety of compounds across biological membranes. ABC transporters are the largest family of proteins in many completely sequenced bacteria. ABC transporters are composed of two copies of this domain and two copies of a transmembrane domain pfam00664. These four domains may bel…	sp|Q8LPJ4|AB2E_ARATH ABC transporter E family member 2 OS=Arabidopsis thaliana GN=ABCE2 PE=2 SV=1 0.0	tr|A0A0A0KWQ2|A0A0A0KWQ2_CUCSA Uncharacterized protein OS=Cucumis sativus GN=Csa_4G252930 PE=4 SV=1 9.2e-220	GO:0005215, transporter activity;GO:0005524, ATP binding;GO:0016020, membrane;GO:0016887, ATPase activity;GO:0046872, metal ion binding;GO:0051539, 4 iron, 4 sulfur cluster binding	-
TRINITY_DN94186_c1_g3	GTCCAGAAGGGATACCAATCTAAGATTATGGAAGCGAAGGATGATCGAATGAAATCTACTTCAGAAATTCTTCGAAACATGAAGACTCTGAAACTTCAAGCATGGGACAGTCATTATCTTCTAAAGCTAGAAAGCCTCAGGAAAACAGAGTACAAATGGCTTTGGAAGTCGCTTAGGCTACAGGCTATAACGGCCTTTATATTTTGGGGATCACCAACATTCATTTCTGTTTTAACTTTTGGAGGATGTATTCTTATGGGGATTCCACTTACATCTGGGAGAGTGTTATCTGCATTGGCTACATTTAGAATGTTACAAGATCCTATCTTTAACCTGCCTGATCTCCTGTCCGTGATTGCACAGGGAAAAGTTTCTGCAGATAGAATTGCTTCATACCTC…	TIGR00957, Multidrug_resistance-associated_protein_1, multi drug resistance-associated protein (MRP). This model describes multi drug resistance-associated protein (MRP) in eukaryotes. The multidrug resistance-associated protein is an integral membrane protein that causes multidrug resistance when overexpressed in mammalian cells. It belongs to ABC transporter superfamily. The protein topology an…	KOG0054, KOG0054, KOG0054, Multidrug resistance-associated protein/mitoxantrone resistance protein, ABC superfamily [Secondary metabolites biosynthesis, transport and catabolism]. 0.0	gi|1021050935|gb|KZN08713.1| hypothetical protein DCAR_001369 [Daucus carota subsp. sativus] 0.0e+00	gi|590561118|ref|XM_007008659.1| Theobroma cacao Multidrug resistance protein ABC transporter family (TCM_042344) mRNA, complete cds 0.0	pfam00664, ABC_membrane, ABC transporter transmembrane region. This family represents a unit of six transmembrane helices. Many members of the ABC transporter family (pfam00005) have two such regions. 2.60391e-11	sp|Q9M1C7|AB9C_ARATH ABC transporter C family member 9 OS=Arabidopsis thaliana GN=ABCC9 PE=2 SV=2 0.0	tr|A0A068UM35|A0A068UM35_COFCA Uncharacterized protein OS=Coffea canephora GN=GSCOC_T00028689001 PE=4 SV=1 0.0e+00	GO:0005524, ATP binding;GO:0008559, xenobiotic transmembrane transporting ATPase activity;GO:0016021, integral component of membrane;GO:0042626, ATPase activity, coupled to transmembrane movement of substances	-
[truncated: 79 more rows]
