# Supplementary material for: Comparative Transcriptomics Unveil the Crucial Genes Involved in Coumarin Biosynthesis in Peucedanum praeruptorum Dunn
Source: Front Plant Sci. 2022 May 17;13:899819. doi: 10.3389/fpls.2022.899819 (PMC9152428; doi:10.3389/fpls.2022.899819)
Supplement: Supplementary file 9 [file Table_5.XLSX]

## Sheet: Sheet1
Gene ID	C1	C2	C3	C4	C5	C6	D1	D2	D3	D4	D5	D6
TRINITY_DN99045_c1_g2	0.216598	1.23057	0.528214	1.12352	0.790947	0.561843	1.21149	0.912668	0.489068	5.00098	0.404212	0.320542
TRINITY_DN98925_c13_g3	8.93599	6.3914	5.2606	13.8907	6.9175	3.71712	1.273	4.31658	3.42893	10.3418	6.89151	5.46511
TRINITY_DN98579_c2_g1	1.16101	4.65538	2.22708	5.82658	3.57325	2.78478	2.45224	3.469	1.2306	2.09503	0.342052	0.889128
TRINITY_DN97998_c3_g1	3.06448	1.31812	1.89469	5.32511	3.55406	1.15581	1.62064	1.16426	1.98122	5.10617	2.36108	3.10635
TRINITY_DN97936_c1_g1	2.48959	4.57848	4.79498	4.51796	2.29434	1.17441	5.14166	3.55625	4.08209	9.95131	28.7816	2.3855
TRINITY_DN97936_c0_g3	0.920526	0	0.0288269	0.517319	0.0276999	0.17313	0.0528683	0.112195	0.199167	3.85005	0.247444	0.420896
TRINITY_DN97799_c3_g1	3.9023	4.51535	3.61782	9.50057	8.51603	4.15717	3.41968	3.3023	4.57412	5.57522	9.23712	8.76663
TRINITY_DN97727_c2_g1	2.73448	0.916661	1.00683	1.42957	0.899651	4.1131	1.25667	2.49469	1.0771	3.97833	7.88907	4.45284
TRINITY_DN97570_c1_g1	1.6676	1.55623	5.02445	5.44694	1.69762	2.01112	0.779943	1.34936	1.69244	3.01582	0.0671177	2.65921
TRINITY_DN97557_c0_g1	1.23285	0.368638	0.580669	3.3084	6.7504	6.16402	2.34276	1.1789	0.629706	4.5154	13.6889	4.47382
TRINITY_DN97409_c1_g1	0.606294	2.00662	1.25372	1.54786	1.52379	0.738759	2.70546	1.42522	1.35806	1.07955	1.88099	5.98126
TRINITY_DN96988_c1_g4	72.1287	63.3068	122.865	85.0648	108.435	73.3325	80.829	177.469	56.7343	43.3305	38.4605	44.9007
TRINITY_DN96811_c2_g1	0.731199	1.94896	0.589554	2.34899	1.4876	0.872132	0.732468	1.22368	2.46526	2.44639	3.76591	2.43822
TRINITY_DN96499_c0_g1	0.454456	0.320003	12.6044	6.16534	5.48928	1.93	0.174533	0.237949	0.233176	2.03287	0.365058	2.20986
TRINITY_DN96361_c1_g2	0.581535	0.760963	0.902757	2.22077	1.32071	0.646368	0.847232	1.30891	0.692888	1.42867	3.41015	0.679896
TRINITY_DN96033_c1_g1	6.28356	4.22695	4.17959	10.3256	6.78579	24.6512	4.14757	0.349788	3.06905	3.19782	35.5848	19.2889
TRINITY_DN96014_c1_g1	0.294605	0.629077	0.190354	10.3399	10.5066	9.68206	0.457852	0.145928	0.707479	1.75699	51.6095	27.05
TRINITY_DN95710_c3_g1	3.01689	2.65561	2.37681	4.99856	1.91038	1.15207	2.62568	2.92217	2.638	11.795	1.8922	2.69299
TRINITY_DN95608_c1_g1	5.06066	1.86085	0.958421	3.54225	2.05674	0.502295	0.592194	1.79806	0.588604	2.96727	3.13335	2.37414
TRINITY_DN94728_c2_g1	17.0221	15.7419	21.2351	11.7074	9.87741	7.00424	8.42678	18.1504	10.4928	25.6353	14.7065	14.9448
TRINITY_DN94634_c1_g6	16.0839	11.5487	11.9939	18.5207	17.4494	11.0827	6.36299	10.4494	9.57963	17.2904	21.3913	19.1351
TRINITY_DN94618_c0_g1	0.227681	0.0715527	0.142778	0.436684	0.136044	0	0.0246078	0.249835	0	0.156641	0.048093	0.251037
TRINITY_DN94350_c2_g4	64.0949	37.4052	29.3519	104.582	124.038	60.7329	16.7553	29.3183	41.4323	49.2331	47.0598	33.332
TRINITY_DN94186_c1_g3	0.592686	0.74869	2.13557	3.80254	3.73907	1.55749	0.571148	0.671187	0.475388	4.9473	2.27514	5.14344
TRINITY_DN94176_c0_g1	0.814264	0.807875	2.9831	5.58083	6.85799	4.13943	1.92602	3.17286	1.21134	5.90744	8.70019	12.0458
TRINITY_DN93904_c1_g1	2.80715	6.92915	2.22846	8.41997	10.1665	8.88215	5.28778	6.55117	3.62939	5.76614	10.632	8.97641
TRINITY_DN93793_c2_g4	0.0485126	0.394139	0.344845	0.736379	0.328753	0.067793	0.123968	0.133482	0.361426	0.672623	0.266903	1.14037
TRINITY_DN92803_c1_g2	0.343734	1.03828	1.35434	5.24237	1.60078	2.04765	0.621148	0.536442	0.947622	0.99726	3.46899	2.62095
TRINITY_DN92696_c0_g1	12.2487	7.66596	9.96924	15.6939	1.51155	6.23646	5.67722	13.7879	6.25074	10.7107	19.5779	5.74477
TRINITY_DN92578_c0_g1	1.97434	2.91757	0.848583	0.712657	1.18106	1.1197	2.77702	0.763918	0.343079	3.58559	1.26788	0.786201
TRINITY_DN92452_c4_g1	7.72424	6.76895	6.66793	11.762	13.7806	8.71901	6.1659	4.95706	5.30513	13.3165	19.62	17.08
TRINITY_DN92406_c0_g1	3.5755	8.54849	4.16288	0.854716	0.206532	0.442268	3.08422	6.29533	4.37214	9.11892	4.04582	4.47345
TRINITY_DN92081_c0_g1	0.156493	0	0.0344562	0.682353	0.613522	0	0	0.393204	1.82084	2.02745	1.05422	0.132747
TRINITY_DN91254_c0_g1	0	0.583973	0	0.0483781	0.0439658	0	0.0624955	0	0.0766619	0.112123	0	0
TRINITY_DN91059_c0_g2	1.13495	0.586388	1.71735	16.0566	10.3438	10.2319	1.16865	0.711093	0.647984	0.560325	0	0
TRINITY_DN90644_c1_g4	0.317588	0.333178	0.374113	0.789434	0.750887	0.0339629	0.49769	0.661386	0.307201	1.41124	1.39538	6.45492
TRINITY_DN90573_c0_g1	3.0741	1.52547	2.6738	2.68182	1.46752	1.26529	1.84961	2.31223	1.99155	4.07512	3.47862	3.06846
TRINITY_DN90563_c0_g1	0.0853021	0.558478	0.371984	3.97348	2.09563	0.349921	0.0244686	0.577003	0.397832	0.702765	1.23518	5.1215
TRINITY_DN90372_c0_g4	0.32279	6.79075	3.13412	1.80105	0.26544	0.181377	0.910927	1.25942	0.633715	6.46613	17.2458	6.85459
TRINITY_DN90067_c0_g1	4.26041	1.50139	1.62149	2.96879	2.31776	0.475031	1.53893	1.65599	2.17159	3.27413	6.91679	6.47422
TRINITY_DN89676_c0_g1	13.6737	21.4218	8.86589	31.4429	22.011	13.2935	28.4367	21.1434	19.9418	21.4378	63.3922	25.6257
TRINITY_DN88597_c0_g3	67.1938	61.5698	56.742	148.501	176.787	152.317	65.4821	41.966	57.4525	73.6985	254.554	175.892
TRINITY_DN88551_c0_g1	1.91426	1.36668	2.51026	3.08356	0.150823	1.0098	0.686519	2.57629	1.0437	0.204085	0.0183815	0.166234
TRINITY_DN88481_c2_g1	6.06637	4.66677	3.4092	8.98797	12.8996	7.56858	4.87301	4.29024	5.11205	8.14883	22.8319	14.3925
TRINITY_DN88284_c0_g1	0.214844	0.0992595	0.504246	0.318092	0.0804047	0.167525	0.362467	0.267432	0	0.500498	0.0358387	0.162877
TRINITY_DN88186_c0_g1	0.995395	0.441812	0.294564	0	0.0701451	0	0	0.261335	0.193665	1.51641	0	0
TRINITY_DN88132_c1_g1	0.124048	0.467998	0.208418	3.83869	0.703787	0.47465	0.0617313	0.20319	0.0240299	0.258882	0.470314	4.39687
TRINITY_DN87750_c0_g1	2.55632	1.94659	2.17515	1.40738	1.58569	0.531143	0.399734	1.20525	0.854669	0.0766802	2.8351	7.11356
TRINITY_DN87368_c0_g2	0	0	2.45025	0	0	1.14711	0	0	1.1356	0	0.115718	0.433195
TRINITY_DN87325_c0_g1	1.25902	1.36182	1.57171	3.02294	2.50959	1.72665	1.00238	1.94383	0.648411	5.48144	2.36365	12.8472
TRINITY_DN87265_c0_g4	0	0	0	0	0	0	0	1.26469	0	0	1.80703	0.0395452
TRINITY_DN8683_c0_g1	0	0	0	0	0	0	0.0757787	0.246207	0	0.166258	0	0.247921
TRINITY_DN86688_c1_g3	0.8326	0.321573	0.21556	0	0.137496	0	0.128983	0.278052	0.0812898	6.32179	0.0454074	0
TRINITY_DN86296_c0_g1	2.17494	13.1668	11.5351	8.37224	3.20272	3.41345	6.37789	5.69854	9.13673	15.8642	21.0727	12.4085
TRINITY_DN86252_c1_g1	0.6706	0	0	0	0	0.272755	0	0.28243	0	0.282438	0.176764	0
TRINITY_DN85855_c0_g1	0.560362	0.213247	0.324258	0	0.0256022	0.10674	0.0244488	0.416427	0	0.131753	0	0.155547
TRINITY_DN84211_c1_g1	0.574352	0.340816	0.255714	1.61679	0	0.0912736	0.457547	0.0730249	0	0.110275	5.25238	2.34881
TRINITY_DN83637_c1_g5	0.697551	0	0	0	0	0	0	0.293687	1.40838	3.11275	0	0
TRINITY_DN83561_c3_g2	0.606064	0.408541	1.54459	2.45128	0.123899	0.0115762	0.585936	1.2581	0.110015	0.15053	0.0833417	0
TRINITY_DN83367_c1_g2	4.2464	5.04106	7.08951	3.51602	3.42702	3.80329	5.5092	5.54737	12.5424	12.7766	10.9505	11.2896
TRINITY_DN83034_c0_g1	0.137938	0.338375	0.034056	0.111388	0.129648	0	0	1.72325	0.0692014	4.40789	0.0724831	0.129395
TRINITY_DN82887_c1_g2	0.220142	1.94298	0.477124	0.634424	2.72602	0	0.338643	1.84081	0.910161	4.82072	1.60027	1.62873
TRINITY_DN81698_c0_g1	1.71136	1.64949	1.7527	6.13053	3.46651	2.87471	0.693118	1.91846	1.24219	2.20167	2.87189	3.48406
TRINITY_DN81304_c0_g1	0.0735814	0.153155	0.282905	2.13012	0.0497725	0.520049	0.158898	0.454671	0.776679	0.0243298	0.031629	0.335426
TRINITY_DN80626_c2_g1	32.4374	22.2437	19.4812	77.1644	75.1401	45.2998	14.4206	16.8498	19.8751	29.6107	56.1157	36.3193
TRINITY_DN80228_c2_g1	0.513709	0.897219	0.0955388	0.059137	0	0.0318333	0.0513876	0.1978	0.505808	1.06658	0.0558545	0
TRINITY_DN79696_c0_g3	0.275566	0	0	0.172231	0.0523007	0.162371	0.780874	0.0556223	0	0	0	0.0692338
TRINITY_DN79609_c0_g1	0.154236	0.0480996	0	0.141534	0.0181208	0.0768651	0.0775761	0.540257	0	1.19921	1.81921	0.0366463
TRINITY_DN79069_c0_g1	0.371712	1.01814	1.6144	1.76486	4.9885	0.297383	0.305171	1.11918	0.510447	2.89986	0.798757	1.38071
TRINITY_DN78982_c1_g1	5.86473	8.18812	5.05834	6.96147	4.28734	2.98865	1.03337	4.00844	16.4511	9.24838	4.30581	5.59131
TRINITY_DN78862_c0_g1	0.682777	2.40435	1.23063	2.58245	2.3956	2.63319	0.648895	1.21915	1.32678	1.11349	4.27048	3.27737
TRINITY_DN77916_c0_g2	5.30967	3.73367	3.79576	2.81561	1.06476	0.735886	1.66043	4.03515	2.53993	9.05583	7.17145	2.31165
TRINITY_DN77001_c0_g1	1.25105	3.84532	3.75057	5.96443	3.26326	4.36083	5.74536	4.48807	4.57319	10.293	13.4819	5.62842
TRINITY_DN76593_c2_g1	2.97601	2.61246	3.03426	2.79271	3.48635	1.51108	3.08439	3.13832	4.26563	8.63494	2.25129	7.23993
TRINITY_DN75952_c0_g1	3.2547	4.44796	2.38194	5.21798	5.44639	4.15846	2.84662	2.72232	4.30502	3.28705	19.9668	21.3978
TRINITY_DN74957_c0_g4	45.3555	31.9515	30.0053	10.6374	14.7909	7.72713	15.3098	31.4455	26.3274	59.2165	23.8263	22.4406
TRINITY_DN74788_c0_g4	6.66238	4.03286	3.79717	8.8955	9.67646	3.05775	1.14826	2.77765	2.39768	7.14956	8.9079	5.19627
TRINITY_DN74542_c1_g3	17.089	12.6754	10.6507	25.1821	22.1438	15.8508	10.8699	13.1474	14.2521	15.8629	21.1558	20.2258
TRINITY_DN74384_c1_g2	0.870145	5.11337	1.94926	11.4249	4.57749	5.33092	2.4093	3.37365	3.61532	11.6401	15.0233	25.9537
TRINITY_DN74096_c1_g1	0.726458	2.07785	2.24232	5.40166	3.38614	1.2161	0.790611	1.75131	1.76621	3.97741	2.40339	3.78375
TRINITY_DN73806_c1_g1	0	0.0388124	0.034986	0.0911725	0.0337518	0.0441803	0.0405142	0.0256002	0.0098621	0.0781641	0.0113238	0.0681335
TRINITY_DN72215_c0_g3	2.35717	1.97404	1.61382	2.34349	4.06518	1.35896	2.04856	1.03008	2.9127	2.63684	3.53279	3.68809
TRINITY_DN71702_c0_g1	10.803	8.86516	6.63123	20.8174	15.0585	17.114	8.01368	9.00052	4.53103	8.9726	9.82815	11.3406
TRINITY_DN71330_c1_g2	3.42143	7.77585	3.22404	5.37963	5.52969	3.79403	3.39038	7.80491	8.95898	17.2727	6.89713	11.9122
TRINITY_DN70725_c1_g2	24.6368	22.6078	18.9583	11.1334	18.2153	6.35384	12.5824	21.7501	25.0102	19.2513	13.2626	7.64346
TRINITY_DN70652_c0_g1	0.196569	0.101665	0.0836715	0	0.161586	0.0562439	0	0.362784	0	0.166829	0	0
TRINITY_DN69322_c0_g1	0	0	0	0.046174	0	0	0	0	0	0.0863938	0.055957	2.29093
TRINITY_DN68730_c1_g1	14.9623	19.0452	16.3209	27.9297	61.7819	45.5229	10.772	16.7565	15.5238	23.7006	37.5398	47.5441
TRINITY_DN68609_c0_g4	0	0.235096	0	0	0.046577	0.0242887	0.575873	0.604473	0.19927	1.05245	0	0.0860958
TRINITY_DN68358_c0_g1	0.0762853	0.545599	0.0327437	0.493394	0	0	0.059197	0	0.148737	1.2417	0.0416503	0.13652
TRINITY_DN68143_c0_g1	1.13755	4.19862	2.01861	7.54931	6.73484	5.28996	2.24756	1.66043	1.69418	2.51707	6.58586	7.78991
TRINITY_DN68044_c6_g2	0	0.163963	0	0	0	0	0.341639	0.242697	1.56124	0.602308	0.0429848	0.0926997
TRINITY_DN67901_c1_g1	1.58886	2.35243	0.920201	0.907392	1.82833	1.08907	1.14793	9.78978	0.609927	16.7845	11.571	7.95054
TRINITY_DN66051_c0_g1	0.0661406	0.0503678	0.283003	0.0298763	0.108787	0.0566693	0.0259582	0.0550769	0.0958302	0	0.127275	0
TRINITY_DN64175_c0_g1	0	0	0	0.063033	0	0.0298737	0	0	1.17968	0	0.0383439	0.435954
TRINITY_DN62510_c0_g1	0	0	0	0	0	0	0	0.190564	0.388329	1.14569	0.250336	0.0477705
TRINITY_DN57980_c0_g1	0.0241648	0	0	0	0.0198733	0.0207461	0	0	0	0	1.15755	0
TRINITY_DN57494_c0_g1	0	0	0	0.0306472	0	0	0.0532402	0	0	0	0.037295	0.593459
TRINITY_DN33733_c0_g1	0.686577	0	0.606123	0	0	0	0	0.289091	0	0.288983	0	0
TRINITY_DN18398_c0_g1	0.100864	0.154377	0	0	0	0.0860844	0.0394031	0.0420341	0.0977878	0.0853683	0.0276493	0
TRINITY_DN163945_c0_g1	0	0	0	0	0	0	0	0.177862	1.05945	0	0.113297	0
TRINITY_DN141552_c0_g1	0	0	0	0.0568435	0	0.161811	0	0.0261989	0	0.612546	0	0
TRINITY_DN104782_c0_g1	0	0	0	0	0	0	0.253982	0	0.216212	0.279496	0.0597861	0.0927895
