# Supplementary material for: Comparative Transcriptomics Unveil the Crucial Genes Involved in Coumarin Biosynthesis in Peucedanum praeruptorum Dunn
Source: Front Plant Sci. 2022 May 17;13:899819. doi: 10.3389/fpls.2022.899819 (PMC9152428; doi:10.3389/fpls.2022.899819)
Supplement: Supplementary file 10 [file Table_6.XLSX]

## Sheet: Sheet1
black	blue	browm	green	greenyellow	grey	magenta	pink	purple	red	tan	turquiose	yellow
ID	ID	ID	ID	ID	ID	ID	ID	ID	ID	ID	ID	ID
TRINITY_DN76365_c0_g1	TRINITY_DN79669_c0_g4	TRINITY_DN78351_c0_g1	TRINITY_DN87663_c1_g2	TRINITY_DN96803_c2_g1	TRINITY_DN76315_c2_g1	TRINITY_DN90457_c0_g1	TRINITY_DN76226_c0_g1	TRINITY_DN94621_c2_g2	TRINITY_DN79092_c2_g1	TRINITY_DN86905_c0_g1	TRINITY_DN78445_c0_g2	TRINITY_DN82831_c0_g1
TRINITY_DN91982_c0_g1	TRINITY_DN77100_c0_g1	TRINITY_DN81693_c0_g4	TRINITY_DN98206_c0_g2	TRINITY_DN97886_c1_g4	TRINITY_DN86882_c1_g1	TRINITY_DN97207_c0_g2	TRINITY_DN73173_c1_g1	TRINITY_DN69239_c2_g1	TRINITY_DN70579_c1_g2	TRINITY_DN90012_c0_g2	TRINITY_DN69726_c2_g1	TRINITY_DN86719_c0_g2
TRINITY_DN87712_c1_g4	TRINITY_DN82132_c0_g1	TRINITY_DN91987_c1_g2	TRINITY_DN92592_c2_g2	TRINITY_DN72171_c0_g4	TRINITY_DN93090_c3_g1	TRINITY_DN80427_c0_g1	TRINITY_DN90688_c0_g1	TRINITY_DN91104_c2_g1	TRINITY_DN78398_c1_g2	TRINITY_DN95482_c1_g1	TRINITY_DN93967_c0_g1	TRINITY_DN75582_c1_g3
TRINITY_DN84706_c0_g2	TRINITY_DN90636_c1_g3	TRINITY_DN88661_c1_g2	TRINITY_DN89650_c0_g1	TRINITY_DN75755_c1_g2	TRINITY_DN96088_c1_g1	TRINITY_DN84753_c0_g1	TRINITY_DN97717_c2_g1	TRINITY_DN77040_c0_g7	TRINITY_DN76150_c0_g1	TRINITY_DN98900_c7_g2	TRINITY_DN66768_c0_g1	TRINITY_DN87065_c1_g4
TRINITY_DN70953_c0_g1	TRINITY_DN95650_c1_g5	TRINITY_DN78445_c0_g1	TRINITY_DN96996_c3_g1	TRINITY_DN68789_c0_g1	TRINITY_DN83932_c1_g1	TRINITY_DN73976_c1_g1	TRINITY_DN98727_c3_g1	TRINITY_DN97391_c2_g3	TRINITY_DN70579_c1_g1	TRINITY_DN76228_c1_g3	TRINITY_DN97647_c2_g1	TRINITY_DN98586_c1_g1
TRINITY_DN94665_c1_g1	TRINITY_DN98851_c0_g1	TRINITY_DN74976_c1_g1	TRINITY_DN65502_c0_g1	TRINITY_DN86787_c1_g2	TRINITY_DN98766_c1_g3	TRINITY_DN85608_c1_g1	TRINITY_DN98115_c0_g1	TRINITY_DN91041_c0_g6	TRINITY_DN86178_c2_g5	TRINITY_DN86254_c0_g1	TRINITY_DN84007_c2_g2	TRINITY_DN97322_c4_g1
TRINITY_DN94175_c1_g4	TRINITY_DN92581_c1_g1	TRINITY_DN77209_c2_g1	TRINITY_DN88359_c2_g4	TRINITY_DN92437_c1_g3	TRINITY_DN72935_c2_g1	TRINITY_DN78667_c0_g4	TRINITY_DN92008_c1_g2	TRINITY_DN91047_c2_g1	TRINITY_DN80987_c1_g3	TRINITY_DN98405_c3_g1	TRINITY_DN96502_c0_g4	TRINITY_DN80182_c0_g1
TRINITY_DN86921_c0_g3	TRINITY_DN91072_c0_g1	TRINITY_DN95742_c1_g1	TRINITY_DN72344_c1_g3	TRINITY_DN97587_c1_g1	TRINITY_DN89009_c0_g1	TRINITY_DN78336_c0_g1	TRINITY_DN95513_c0_g1	TRINITY_DN82139_c2_g4	TRINITY_DN95925_c0_g2	TRINITY_DN96312_c1_g3	TRINITY_DN71706_c0_g3	TRINITY_DN90650_c1_g2
TRINITY_DN72387_c1_g3	TRINITY_DN74775_c1_g1	TRINITY_DN85709_c1_g4	TRINITY_DN93410_c1_g3	TRINITY_DN94227_c0_g2	TRINITY_DN95531_c0_g1	TRINITY_DN97919_c2_g3	TRINITY_DN96167_c1_g3	TRINITY_DN98877_c1_g2	TRINITY_DN73122_c0_g1	TRINITY_DN73885_c0_g1	TRINITY_DN83719_c0_g4	TRINITY_DN91268_c0_g1
TRINITY_DN84285_c2_g1	TRINITY_DN92725_c2_g3	TRINITY_DN98242_c3_g1	TRINITY_DN88809_c0_g1	TRINITY_DN97723_c2_g3	TRINITY_DN66891_c0_g1	TRINITY_DN90315_c1_g1	TRINITY_DN95661_c0_g2	TRINITY_DN97206_c1_g2	TRINITY_DN89193_c2_g9	TRINITY_DN81097_c3_g1	TRINITY_DN80284_c2_g1	TRINITY_DN86285_c4_g2
TRINITY_DN73456_c0_g1	TRINITY_DN94914_c0_g2	TRINITY_DN76909_c1_g2	TRINITY_DN76365_c0_g3	TRINITY_DN90461_c0_g2	TRINITY_DN73891_c1_g5	TRINITY_DN94065_c2_g1	TRINITY_DN81544_c0_g2	TRINITY_DN76224_c0_g1	TRINITY_DN87933_c1_g1	TRINITY_DN71802_c2_g2	TRINITY_DN88952_c1_g1	TRINITY_DN90765_c1_g6
TRINITY_DN94294_c2_g2	TRINITY_DN76409_c1_g3	TRINITY_DN86854_c0_g1	TRINITY_DN83033_c1_g2	TRINITY_DN97317_c1_g2	TRINITY_DN94218_c1_g1	TRINITY_DN94914_c0_g1	TRINITY_DN97890_c1_g1	TRINITY_DN93932_c1_g2	TRINITY_DN88349_c1_g1	TRINITY_DN85926_c0_g1	TRINITY_DN93109_c0_g1	TRINITY_DN75945_c0_g1
TRINITY_DN90197_c1_g1	TRINITY_DN85822_c2_g1	TRINITY_DN98568_c5_g1	TRINITY_DN92428_c0_g7	TRINITY_DN94227_c0_g1	TRINITY_DN80953_c0_g1	TRINITY_DN88479_c1_g3	TRINITY_DN81157_c0_g3	TRINITY_DN94597_c0_g2	TRINITY_DN81229_c2_g2	TRINITY_DN68532_c1_g2	TRINITY_DN77233_c0_g1	TRINITY_DN93963_c2_g2
TRINITY_DN63015_c0_g1	TRINITY_DN98338_c2_g1	TRINITY_DN87261_c0_g1	TRINITY_DN86903_c2_g4	TRINITY_DN90761_c1_g2	TRINITY_DN97703_c3_g1	TRINITY_DN70842_c0_g1	TRINITY_DN90372_c0_g3	TRINITY_DN72336_c2_g2	TRINITY_DN82686_c0_g3	TRINITY_DN95553_c0_g3	TRINITY_DN90148_c2_g1	TRINITY_DN85583_c3_g2
TRINITY_DN74378_c1_g1	TRINITY_DN74623_c0_g1	TRINITY_DN98183_c2_g1	TRINITY_DN92428_c0_g1	TRINITY_DN70337_c3_g2	TRINITY_DN82630_c0_g1	TRINITY_DN75766_c1_g1	TRINITY_DN83179_c0_g2	TRINITY_DN94597_c0_g3	TRINITY_DN94528_c0_g1	TRINITY_DN81840_c0_g1	TRINITY_DN81058_c1_g3	TRINITY_DN86281_c0_g1
TRINITY_DN69539_c0_g2	TRINITY_DN90636_c1_g1	TRINITY_DN77133_c1_g5	TRINITY_DN96276_c1_g2	TRINITY_DN92983_c0_g2	TRINITY_DN87135_c0_g2	TRINITY_DN93654_c1_g1	TRINITY_DN83179_c0_g1	TRINITY_DN80615_c0_g1	TRINITY_DN69969_c0_g1	TRINITY_DN98993_c7_g1	TRINITY_DN78442_c0_g2	TRINITY_DN78181_c1_g1
TRINITY_DN69234_c0_g2	TRINITY_DN98348_c1_g5	TRINITY_DN95923_c1_g1	TRINITY_DN95431_c2_g1	TRINITY_DN97886_c1_g3	TRINITY_DN81275_c0_g1	TRINITY_DN74108_c0_g2	TRINITY_DN69832_c0_g2	TRINITY_DN92404_c2_g1	TRINITY_DN86704_c2_g2	TRINITY_DN84792_c1_g4	TRINITY_DN77126_c1_g3	TRINITY_DN91879_c1_g1
TRINITY_DN88934_c2_g1	TRINITY_DN91446_c2_g5	TRINITY_DN76076_c0_g1	TRINITY_DN98704_c3_g1	TRINITY_DN97341_c1_g1	TRINITY_DN91609_c1_g2	TRINITY_DN71728_c0_g2	TRINITY_DN84364_c0_g1	TRINITY_DN86500_c1_g1	TRINITY_DN73937_c2_g1	TRINITY_DN73706_c1_g2	TRINITY_DN95788_c0_g2	TRINITY_DN86285_c4_g1
TRINITY_DN79988_c0_g1	TRINITY_DN92993_c1_g1	TRINITY_DN91764_c0_g1	TRINITY_DN69060_c3_g1	TRINITY_DN73619_c2_g3	TRINITY_DN79060_c2_g2	TRINITY_DN90288_c1_g1	TRINITY_DN69949_c6_g1	TRINITY_DN77221_c1_g2	TRINITY_DN75400_c1_g2	TRINITY_DN92688_c1_g2	TRINITY_DN97472_c3_g1	TRINITY_DN81586_c3_g2
TRINITY_DN87452_c1_g1	TRINITY_DN98673_c1_g1	TRINITY_DN75450_c0_g1	TRINITY_DN86576_c2_g1	TRINITY_DN86624_c1_g3	TRINITY_DN86482_c2_g1	TRINITY_DN88481_c3_g1	TRINITY_DN72619_c2_g1	TRINITY_DN93871_c0_g3	TRINITY_DN74427_c0_g1	TRINITY_DN82873_c0_g1	TRINITY_DN86344_c0_g1	TRINITY_DN90455_c0_g2
TRINITY_DN77673_c0_g2	TRINITY_DN80170_c4_g1	TRINITY_DN84367_c0_g1	TRINITY_DN69116_c2_g1	TRINITY_DN96569_c1_g1	TRINITY_DN98188_c1_g1	TRINITY_DN88799_c0_g2	TRINITY_DN71112_c0_g3	TRINITY_DN80840_c2_g1	TRINITY_DN80964_c2_g3	TRINITY_DN95275_c0_g2	TRINITY_DN96584_c3_g4	TRINITY_DN81258_c1_g2
TRINITY_DN97388_c0_g1	TRINITY_DN71377_c0_g2	TRINITY_DN87161_c2_g1	TRINITY_DN90684_c0_g9	TRINITY_DN81420_c1_g3	TRINITY_DN93247_c0_g1	TRINITY_DN88907_c1_g2	TRINITY_DN94228_c1_g1	TRINITY_DN78140_c1_g2	TRINITY_DN93095_c0_g1	TRINITY_DN75352_c1_g1	TRINITY_DN96502_c0_g2	TRINITY_DN96239_c1_g2
TRINITY_DN68654_c0_g5	TRINITY_DN81650_c1_g1	TRINITY_DN80955_c0_g1	TRINITY_DN88359_c2_g3	TRINITY_DN78992_c0_g2	TRINITY_DN72558_c0_g3	TRINITY_DN93724_c1_g1	TRINITY_DN71309_c3_g1	TRINITY_DN86848_c0_g1	TRINITY_DN87069_c0_g1	TRINITY_DN71082_c0_g1	TRINITY_DN87544_c1_g3	TRINITY_DN86958_c2_g2
TRINITY_DN93694_c0_g1	TRINITY_DN98216_c0_g1	TRINITY_DN94745_c1_g1	TRINITY_DN73309_c0_g1	TRINITY_DN95727_c1_g4	TRINITY_DN83447_c2_g2	TRINITY_DN87992_c1_g3	TRINITY_DN75221_c0_g2	TRINITY_DN70880_c0_g1	TRINITY_DN76421_c0_g1	TRINITY_DN85229_c3_g4	TRINITY_DN84665_c2_g2	TRINITY_DN95778_c1_g2
TRINITY_DN70935_c0_g1	TRINITY_DN97435_c2_g1	TRINITY_DN95822_c0_g4	TRINITY_DN96714_c1_g2	TRINITY_DN79100_c0_g1	TRINITY_DN82252_c0_g1	TRINITY_DN72823_c0_g1	TRINITY_DN87487_c0_g1	TRINITY_DN89193_c2_g5	TRINITY_DN77807_c2_g1	TRINITY_DN91810_c1_g4	TRINITY_DN87909_c0_g1	TRINITY_DN97045_c2_g1
TRINITY_DN84285_c2_g6	TRINITY_DN77384_c3_g6	TRINITY_DN81002_c0_g1	TRINITY_DN79906_c2_g1	TRINITY_DN74038_c1_g3	TRINITY_DN79219_c0_g1	TRINITY_DN82685_c2_g3	TRINITY_DN72045_c0_g1	TRINITY_DN95785_c0_g1	TRINITY_DN72552_c1_g1	TRINITY_DN70053_c0_g2	TRINITY_DN84752_c1_g1	TRINITY_DN84817_c0_g2
TRINITY_DN87089_c0_g5	TRINITY_DN84902_c0_g1	TRINITY_DN96925_c0_g4	TRINITY_DN89647_c0_g2	TRINITY_DN94137_c0_g2	TRINITY_DN92646_c1_g1	TRINITY_DN96081_c0_g1	TRINITY_DN92840_c0_g6	TRINITY_DN88470_c0_g1	TRINITY_DN68697_c0_g1	TRINITY_DN85409_c3_g1	TRINITY_DN86575_c0_g2	TRINITY_DN77932_c0_g2
TRINITY_DN97897_c1_g1	TRINITY_DN90894_c0_g2	TRINITY_DN86765_c1_g1	TRINITY_DN89738_c1_g1	TRINITY_DN76064_c1_g1	TRINITY_DN96111_c1_g1	TRINITY_DN71802_c2_g1	TRINITY_DN95009_c0_g1	TRINITY_DN93871_c0_g4	TRINITY_DN84852_c0_g4	TRINITY_DN74178_c1_g3	TRINITY_DN93764_c0_g3	TRINITY_DN87724_c1_g3
TRINITY_DN89509_c0_g1	TRINITY_DN91989_c0_g1	TRINITY_DN98212_c1_g1	TRINITY_DN76389_c0_g2	TRINITY_DN98941_c2_g1	TRINITY_DN89509_c0_g2	TRINITY_DN74927_c0_g1	TRINITY_DN90317_c1_g1	TRINITY_DN72348_c0_g2	TRINITY_DN66593_c1_g2	TRINITY_DN74881_c2_g3	TRINITY_DN97883_c2_g1	TRINITY_DN72200_c0_g1
TRINITY_DN95355_c2_g3	TRINITY_DN98324_c1_g1	TRINITY_DN90506_c0_g1	TRINITY_DN89647_c0_g1	TRINITY_DN79976_c0_g3	TRINITY_DN91418_c0_g1	TRINITY_DN83337_c0_g7	TRINITY_DN74368_c1_g2	TRINITY_DN91695_c1_g2	TRINITY_DN85664_c0_g1	TRINITY_DN92418_c0_g3	TRINITY_DN97993_c1_g1	TRINITY_DN95086_c0_g1
TRINITY_DN83209_c1_g1	TRINITY_DN79382_c1_g1	TRINITY_DN82075_c1_g1	TRINITY_DN84753_c0_g2	TRINITY_DN69634_c0_g4	TRINITY_DN68192_c0_g2	TRINITY_DN81928_c0_g1	TRINITY_DN81300_c0_g1	TRINITY_DN82532_c5_g2	TRINITY_DN75192_c0_g1	TRINITY_DN76316_c2_g2	TRINITY_DN84445_c0_g3	TRINITY_DN87246_c2_g2
TRINITY_DN78810_c0_g2	TRINITY_DN98515_c2_g2	TRINITY_DN88299_c0_g4	TRINITY_DN78103_c0_g1	TRINITY_DN94379_c0_g1	TRINITY_DN95848_c1_g3	TRINITY_DN82433_c0_g1	TRINITY_DN94354_c0_g1	TRINITY_DN81047_c4_g1	TRINITY_DN96396_c1_g2	TRINITY_DN89238_c0_g1	TRINITY_DN90512_c0_g2	TRINITY_DN86124_c0_g1
TRINITY_DN98481_c5_g1	TRINITY_DN97436_c1_g2	TRINITY_DN83073_c1_g2	TRINITY_DN77419_c0_g3	TRINITY_DN59357_c0_g1	TRINITY_DN68248_c0_g1	TRINITY_DN77668_c0_g1	TRINITY_DN75137_c0_g1	TRINITY_DN69399_c1_g1	TRINITY_DN97688_c2_g1	TRINITY_DN95946_c1_g2	TRINITY_DN77049_c0_g3	TRINITY_DN73704_c0_g8
TRINITY_DN85993_c0_g1	TRINITY_DN89452_c0_g1	TRINITY_DN80103_c0_g3	TRINITY_DN95742_c1_g2	TRINITY_DN68368_c0_g1	TRINITY_DN78421_c2_g1	TRINITY_DN78175_c2_g3	TRINITY_DN98374_c2_g2	TRINITY_DN77252_c3_g2	TRINITY_DN75493_c1_g8	TRINITY_DN92863_c0_g1	TRINITY_DN87156_c2_g2	TRINITY_DN78172_c2_g2
TRINITY_DN75431_c0_g4	TRINITY_DN90447_c0_g1	TRINITY_DN92715_c1_g1	TRINITY_DN75182_c0_g1	TRINITY_DN96200_c2_g1	TRINITY_DN95054_c3_g2	TRINITY_DN86549_c0_g1	TRINITY_DN86447_c1_g2	TRINITY_DN94758_c1_g2	TRINITY_DN91212_c0_g1	TRINITY_DN73690_c1_g2	TRINITY_DN70626_c0_g2	TRINITY_DN84705_c2_g1
TRINITY_DN72292_c0_g1	TRINITY_DN77454_c3_g1	TRINITY_DN84698_c0_g1	TRINITY_DN98810_c3_g2	TRINITY_DN81161_c2_g2	TRINITY_DN71158_c3_g1	TRINITY_DN89669_c0_g1	TRINITY_DN96246_c1_g4	TRINITY_DN94503_c0_g1	TRINITY_DN80225_c0_g3	TRINITY_DN92688_c1_g1	TRINITY_DN72281_c0_g1	TRINITY_DN90972_c5_g2
TRINITY_DN84788_c2_g3	TRINITY_DN87557_c0_g1	TRINITY_DN80949_c0_g3	TRINITY_DN96714_c1_g3	TRINITY_DN98206_c1_g1	TRINITY_DN98720_c1_g1	TRINITY_DN76349_c0_g2	TRINITY_DN69183_c0_g3	TRINITY_DN75274_c3_g1	TRINITY_DN91105_c0_g1	TRINITY_DN74361_c0_g2	TRINITY_DN90825_c1_g2	TRINITY_DN79318_c0_g3
TRINITY_DN73738_c0_g2	TRINITY_DN87801_c1_g1	TRINITY_DN92168_c2_g1	TRINITY_DN91941_c1_g1	TRINITY_DN73182_c2_g1	TRINITY_DN81737_c0_g1	TRINITY_DN72043_c0_g2	TRINITY_DN69313_c0_g1	TRINITY_DN83418_c0_g1	TRINITY_DN69859_c0_g1	TRINITY_DN85903_c1_g1	TRINITY_DN85222_c1_g2	TRINITY_DN89581_c0_g2
TRINITY_DN77771_c0_g1	TRINITY_DN87495_c0_g1	TRINITY_DN86120_c2_g3	TRINITY_DN92098_c0_g7	TRINITY_DN95628_c1_g1	TRINITY_DN96485_c1_g3	TRINITY_DN81173_c0_g2	TRINITY_DN82845_c0_g1	TRINITY_DN89238_c0_g2	TRINITY_DN98859_c11_g1	TRINITY_DN91717_c1_g2	TRINITY_DN77619_c2_g3	TRINITY_DN87557_c0_g5
TRINITY_DN78888_c2_g1	TRINITY_DN73252_c0_g1	TRINITY_DN80642_c0_g1	TRINITY_DN90042_c3_g1	TRINITY_DN73033_c0_g1	TRINITY_DN91824_c1_g1	TRINITY_DN96847_c3_g1	TRINITY_DN87488_c0_g4	TRINITY_DN76078_c2_g1	TRINITY_DN90235_c0_g2	TRINITY_DN83133_c1_g2	TRINITY_DN92678_c1_g2	TRINITY_DN94154_c0_g1
TRINITY_DN77465_c0_g3	TRINITY_DN89495_c1_g1	TRINITY_DN93758_c0_g1	TRINITY_DN84198_c0_g2	TRINITY_DN78779_c0_g1	TRINITY_DN94824_c3_g1	TRINITY_DN80261_c0_g1	TRINITY_DN78852_c0_g2	TRINITY_DN76857_c0_g1	TRINITY_DN91892_c2_g4	TRINITY_DN95346_c0_g4	TRINITY_DN97884_c2_g3	TRINITY_DN78933_c1_g5
TRINITY_DN89054_c0_g1	TRINITY_DN74863_c1_g1	TRINITY_DN89737_c0_g3	TRINITY_DN83452_c1_g2	TRINITY_DN98268_c0_g1	TRINITY_DN93519_c1_g1	TRINITY_DN77435_c0_g6	TRINITY_DN74759_c0_g1	TRINITY_DN76775_c0_g1	TRINITY_DN78741_c1_g1	TRINITY_DN98008_c6_g1	TRINITY_DN94734_c0_g3	TRINITY_DN83018_c0_g4
TRINITY_DN94685_c0_g3	TRINITY_DN98374_c1_g1	TRINITY_DN82367_c0_g1	TRINITY_DN79834_c1_g5	TRINITY_DN96646_c0_g1	TRINITY_DN91545_c0_g1	TRINITY_DN78569_c0_g1	TRINITY_DN78764_c0_g1	TRINITY_DN96459_c2_g1	TRINITY_DN77890_c0_g1	TRINITY_DN81993_c1_g3	TRINITY_DN96416_c1_g3	TRINITY_DN88373_c0_g7
TRINITY_DN67767_c0_g1	TRINITY_DN73073_c1_g1	TRINITY_DN90792_c0_g1	TRINITY_DN83320_c1_g3	TRINITY_DN95134_c2_g3	TRINITY_DN94599_c1_g2	TRINITY_DN90021_c0_g2	TRINITY_DN68328_c0_g2	TRINITY_DN79966_c0_g2	TRINITY_DN73447_c0_g1	TRINITY_DN89703_c0_g4	TRINITY_DN97726_c2_g4	TRINITY_DN84952_c3_g1
TRINITY_DN89704_c2_g1	TRINITY_DN90229_c1_g2	TRINITY_DN80536_c0_g1	TRINITY_DN97571_c1_g2	TRINITY_DN97327_c2_g2	TRINITY_DN64299_c0_g1	TRINITY_DN94437_c1_g1	TRINITY_DN88953_c0_g1	TRINITY_DN88792_c1_g2	TRINITY_DN92699_c0_g4	TRINITY_DN78274_c2_g1	TRINITY_DN82354_c0_g3	TRINITY_DN95665_c0_g2
TRINITY_DN81446_c0_g1	TRINITY_DN73552_c1_g1	TRINITY_DN73990_c0_g1	TRINITY_DN82270_c1_g1	TRINITY_DN76464_c3_g1	TRINITY_DN77344_c3_g1	TRINITY_DN93266_c2_g1	TRINITY_DN80478_c1_g4	TRINITY_DN78658_c1_g1	TRINITY_DN95281_c0_g2	TRINITY_DN70217_c0_g1	TRINITY_DN97884_c2_g6	TRINITY_DN86835_c0_g1
TRINITY_DN85006_c4_g1	TRINITY_DN78172_c2_g3	TRINITY_DN68948_c2_g1	TRINITY_DN90338_c2_g1	TRINITY_DN97592_c0_g3	TRINITY_DN70965_c0_g1	TRINITY_DN79410_c1_g1	TRINITY_DN75305_c1_g1	TRINITY_DN78525_c1_g1	TRINITY_DN72550_c0_g4	TRINITY_DN78424_c0_g1	TRINITY_DN89578_c1_g1	TRINITY_DN92697_c0_g1
TRINITY_DN76123_c1_g1	TRINITY_DN98857_c3_g1	TRINITY_DN94463_c1_g3	TRINITY_DN90882_c2_g1	TRINITY_DN96567_c0_g4	TRINITY_DN89456_c0_g1	TRINITY_DN84866_c0_g1	TRINITY_DN77102_c4_g1	TRINITY_DN83759_c0_g1	TRINITY_DN94222_c0_g1	TRINITY_DN77903_c0_g1	TRINITY_DN70599_c1_g1	TRINITY_DN88818_c0_g1
TRINITY_DN97388_c1_g1	TRINITY_DN94305_c0_g1	TRINITY_DN91946_c1_g1	TRINITY_DN83807_c1_g1	TRINITY_DN84333_c0_g1	TRINITY_DN86248_c2_g1	TRINITY_DN82686_c0_g1	TRINITY_DN82691_c1_g2	TRINITY_DN94491_c1_g1	TRINITY_DN91331_c0_g1	TRINITY_DN98049_c1_g1	TRINITY_DN98043_c2_g2	TRINITY_DN95142_c1_g2
TRINITY_DN76888_c1_g4	TRINITY_DN89014_c0_g3	TRINITY_DN82204_c1_g1	TRINITY_DN89145_c0_g1	TRINITY_DN85441_c2_g3	TRINITY_DN69351_c2_g2	TRINITY_DN97632_c3_g2	TRINITY_DN92840_c0_g5	TRINITY_DN80191_c0_g1	TRINITY_DN80439_c0_g1	TRINITY_DN73494_c0_g3	TRINITY_DN97371_c2_g1	TRINITY_DN90972_c5_g4
TRINITY_DN98628_c1_g1	TRINITY_DN74833_c0_g1	TRINITY_DN95093_c1_g1	TRINITY_DN78222_c0_g2	TRINITY_DN89787_c0_g2	TRINITY_DN86970_c0_g1	TRINITY_DN88126_c0_g1	TRINITY_DN88139_c2_g1	TRINITY_DN78791_c2_g6	TRINITY_DN76939_c0_g1	TRINITY_DN95275_c0_g1	TRINITY_DN98123_c2_g1	TRINITY_DN96056_c0_g2
TRINITY_DN78834_c0_g5	TRINITY_DN89334_c0_g5	TRINITY_DN75231_c0_g2	TRINITY_DN77439_c1_g1	TRINITY_DN77412_c1_g5	TRINITY_DN98285_c2_g2	TRINITY_DN92126_c2_g1	TRINITY_DN72467_c1_g2	TRINITY_DN69231_c2_g1	TRINITY_DN70433_c0_g3	TRINITY_DN83173_c0_g2	TRINITY_DN75761_c2_g1	TRINITY_DN75074_c2_g2
TRINITY_DN83867_c1_g5	TRINITY_DN89890_c0_g1	TRINITY_DN81754_c0_g3	TRINITY_DN91233_c0_g2	TRINITY_DN90212_c1_g2	TRINITY_DN70502_c0_g2	TRINITY_DN91435_c3_g1	TRINITY_DN91088_c1_g2	TRINITY_DN87028_c2_g1	TRINITY_DN70020_c0_g1	TRINITY_DN85920_c0_g1	TRINITY_DN88188_c0_g5	TRINITY_DN88398_c1_g1
TRINITY_DN75643_c1_g1	TRINITY_DN82219_c5_g1	TRINITY_DN97993_c1_g2	TRINITY_DN77408_c1_g1	TRINITY_DN75709_c0_g1	TRINITY_DN96735_c2_g1	TRINITY_DN76140_c0_g4	TRINITY_DN84662_c1_g3	TRINITY_DN97691_c3_g3	TRINITY_DN95939_c1_g1	TRINITY_DN87773_c0_g2	TRINITY_DN85421_c0_g2	TRINITY_DN86027_c0_g1
TRINITY_DN93694_c0_g3	TRINITY_DN95661_c1_g1	TRINITY_DN82303_c0_g1	TRINITY_DN96276_c1_g6	TRINITY_DN99058_c7_g1	TRINITY_DN90557_c1_g2	TRINITY_DN96898_c1_g3	TRINITY_DN93177_c0_g1	TRINITY_DN89124_c1_g5	TRINITY_DN85658_c0_g4	TRINITY_DN89467_c0_g1	TRINITY_DN86879_c0_g3	TRINITY_DN88491_c1_g1
TRINITY_DN75665_c2_g1	TRINITY_DN91879_c1_g2	TRINITY_DN84502_c1_g2	TRINITY_DN97717_c2_g6	TRINITY_DN82896_c0_g1	TRINITY_DN97500_c1_g2	TRINITY_DN78254_c2_g1	TRINITY_DN82910_c1_g1	TRINITY_DN80190_c3_g2	TRINITY_DN91841_c2_g3	TRINITY_DN75529_c1_g3	TRINITY_DN97736_c4_g6	TRINITY_DN73704_c0_g9
TRINITY_DN93943_c0_g2	TRINITY_DN96708_c1_g1	TRINITY_DN71728_c0_g1	TRINITY_DN98974_c3_g3	TRINITY_DN87061_c0_g1	TRINITY_DN69664_c0_g1	TRINITY_DN79227_c2_g4	TRINITY_DN94990_c1_g2	TRINITY_DN78392_c0_g4	TRINITY_DN97333_c2_g1	TRINITY_DN86783_c2_g3	TRINITY_DN95201_c2_g4	TRINITY_DN85240_c0_g1
TRINITY_DN98648_c3_g2	TRINITY_DN96861_c0_g4	TRINITY_DN94438_c0_g1	TRINITY_DN94240_c1_g1	TRINITY_DN87178_c3_g2	TRINITY_DN75748_c1_g1	TRINITY_DN90432_c2_g1	TRINITY_DN75384_c2_g3	TRINITY_DN79635_c0_g5	TRINITY_DN76405_c0_g1	TRINITY_DN79499_c0_g1	TRINITY_DN68838_c0_g1	TRINITY_DN89581_c0_g1
TRINITY_DN90802_c1_g1	TRINITY_DN85346_c1_g1	TRINITY_DN87791_c2_g4	TRINITY_DN80103_c0_g1	TRINITY_DN88942_c1_g1	TRINITY_DN74140_c0_g4	TRINITY_DN82326_c0_g1	TRINITY_DN89107_c0_g2	TRINITY_DN83500_c0_g1	TRINITY_DN94490_c0_g1	TRINITY_DN89837_c0_g1	TRINITY_DN73655_c0_g3	TRINITY_DN95508_c2_g2
TRINITY_DN76673_c1_g1	TRINITY_DN95243_c2_g1	TRINITY_DN70705_c1_g1	TRINITY_DN91569_c4_g1	TRINITY_DN97815_c0_g7	TRINITY_DN97554_c2_g1	TRINITY_DN80245_c2_g1	TRINITY_DN67472_c0_g2	TRINITY_DN83258_c1_g3	TRINITY_DN83121_c0_g1	TRINITY_DN95946_c1_g3	TRINITY_DN77989_c3_g2	TRINITY_DN86793_c0_g1
TRINITY_DN90453_c0_g1	TRINITY_DN86314_c0_g1	TRINITY_DN81593_c2_g1	TRINITY_DN67404_c0_g1	TRINITY_DN88051_c0_g1	TRINITY_DN94116_c0_g2	TRINITY_DN92288_c1_g1	TRINITY_DN95858_c1_g2	TRINITY_DN91233_c0_g1	TRINITY_DN78398_c1_g3	TRINITY_DN86251_c1_g5	TRINITY_DN86350_c0_g1	TRINITY_DN90466_c0_g1
TRINITY_DN92836_c0_g1	TRINITY_DN95444_c1_g1	TRINITY_DN94734_c0_g1	TRINITY_DN95916_c0_g3	TRINITY_DN75931_c1_g5	TRINITY_DN83263_c0_g2	TRINITY_DN91722_c1_g4	TRINITY_DN72619_c2_g3	TRINITY_DN94736_c0_g1	TRINITY_DN74082_c1_g3	TRINITY_DN90647_c1_g1	TRINITY_DN77433_c0_g1	TRINITY_DN80631_c0_g1
TRINITY_DN73216_c1_g2	TRINITY_DN97128_c0_g1	TRINITY_DN70410_c0_g1	TRINITY_DN79386_c2_g1	TRINITY_DN90918_c0_g1	TRINITY_DN98797_c0_g1	TRINITY_DN96479_c1_g1	TRINITY_DN89754_c1_g1	TRINITY_DN70181_c2_g2	TRINITY_DN81296_c1_g1	TRINITY_DN93861_c1_g1	TRINITY_DN98849_c3_g1	TRINITY_DN78182_c0_g1
TRINITY_DN96041_c0_g2	TRINITY_DN85223_c0_g2	TRINITY_DN71696_c0_g4	TRINITY_DN89650_c0_g2	TRINITY_DN77508_c0_g1	TRINITY_DN83111_c1_g1	TRINITY_DN97955_c0_g3	TRINITY_DN86773_c0_g3	TRINITY_DN89801_c2_g1	TRINITY_DN77788_c0_g1	TRINITY_DN98443_c1_g1	TRINITY_DN98360_c2_g4	TRINITY_DN73922_c0_g2
TRINITY_DN78577_c1_g2	TRINITY_DN94048_c3_g1	TRINITY_DN91343_c0_g1	TRINITY_DN88744_c4_g1	TRINITY_DN87001_c1_g1	TRINITY_DN97123_c0_g4	TRINITY_DN91721_c0_g1	TRINITY_DN88378_c0_g1	TRINITY_DN98475_c3_g3	TRINITY_DN70268_c3_g1	TRINITY_DN75515_c0_g1	TRINITY_DN86307_c0_g3	TRINITY_DN85423_c2_g4
TRINITY_DN92589_c2_g1	TRINITY_DN78987_c0_g1	TRINITY_DN86775_c0_g2	TRINITY_DN94538_c1_g4	TRINITY_DN74921_c0_g1	TRINITY_DN92891_c1_g1	TRINITY_DN77789_c0_g1	TRINITY_DN78420_c0_g4	TRINITY_DN76822_c0_g2	TRINITY_DN92818_c0_g2	TRINITY_DN83049_c0_g1	TRINITY_DN84708_c1_g1	TRINITY_DN87050_c0_g3
TRINITY_DN97252_c3_g2	TRINITY_DN94863_c0_g1	TRINITY_DN83350_c1_g2	TRINITY_DN86461_c0_g2	TRINITY_DN98020_c0_g2	TRINITY_DN98326_c3_g1	TRINITY_DN97580_c1_g4	TRINITY_DN89689_c0_g4	TRINITY_DN78525_c1_g2	TRINITY_DN93203_c0_g2	TRINITY_DN69354_c0_g5	TRINITY_DN81308_c1_g1	TRINITY_DN91878_c1_g1
TRINITY_DN88882_c1_g1	TRINITY_DN87801_c1_g2	TRINITY_DN88160_c0_g3	TRINITY_DN78327_c0_g1	TRINITY_DN98910_c1_g1	TRINITY_DN78543_c1_g2	TRINITY_DN88247_c0_g1	TRINITY_DN65669_c0_g1	TRINITY_DN67640_c0_g1	TRINITY_DN87965_c0_g2	TRINITY_DN80236_c3_g1	TRINITY_DN74998_c1_g1	TRINITY_DN87466_c2_g1
TRINITY_DN80073_c0_g1	TRINITY_DN77204_c1_g1	TRINITY_DN78238_c0_g2	TRINITY_DN70878_c0_g4	TRINITY_DN85526_c0_g2	TRINITY_DN82887_c1_g1	TRINITY_DN89150_c1_g2	TRINITY_DN90502_c2_g1	TRINITY_DN80916_c2_g3	TRINITY_DN86606_c0_g3	TRINITY_DN86238_c0_g1	TRINITY_DN87488_c0_g1	TRINITY_DN87246_c2_g1
TRINITY_DN69815_c0_g1	TRINITY_DN75287_c2_g1	TRINITY_DN83077_c0_g1	TRINITY_DN84048_c1_g6	TRINITY_DN72359_c4_g2	TRINITY_DN81764_c0_g3	TRINITY_DN87058_c0_g2	TRINITY_DN72217_c1_g1	TRINITY_DN83013_c0_g1	TRINITY_DN91106_c0_g1	TRINITY_DN82636_c2_g1	TRINITY_DN68475_c0_g3	TRINITY_DN76180_c1_g2
TRINITY_DN77875_c1_g2	TRINITY_DN82733_c3_g4	TRINITY_DN85171_c2_g5	TRINITY_DN86914_c1_g7	TRINITY_DN87057_c0_g3	TRINITY_DN80133_c1_g1	TRINITY_DN94891_c0_g5	TRINITY_DN86189_c0_g1	TRINITY_DN68989_c0_g2	TRINITY_DN85766_c2_g1	TRINITY_DN71254_c0_g2	TRINITY_DN73139_c0_g1	TRINITY_DN69623_c0_g2
TRINITY_DN94198_c0_g4	TRINITY_DN75569_c1_g1	TRINITY_DN91760_c1_g1	TRINITY_DN88451_c1_g1	TRINITY_DN96633_c4_g2	TRINITY_DN72222_c3_g1	TRINITY_DN87355_c1_g1	TRINITY_DN77450_c0_g1	TRINITY_DN78817_c1_g1	TRINITY_DN71104_c0_g1		TRINITY_DN87488_c0_g6	TRINITY_DN96123_c1_g1
TRINITY_DN95788_c0_g1	TRINITY_DN80280_c2_g2	TRINITY_DN93088_c2_g6	TRINITY_DN84719_c0_g2	TRINITY_DN97409_c2_g4	TRINITY_DN84544_c2_g2	TRINITY_DN81150_c1_g4	TRINITY_DN80394_c0_g1	TRINITY_DN98900_c7_g1	TRINITY_DN91076_c0_g2		TRINITY_DN77442_c1_g3	TRINITY_DN86290_c1_g1
TRINITY_DN75435_c1_g3	TRINITY_DN77032_c0_g1	TRINITY_DN89400_c0_g1	TRINITY_DN92526_c0_g1	TRINITY_DN73464_c0_g1	TRINITY_DN78886_c0_g2	TRINITY_DN72330_c0_g2	TRINITY_DN91108_c2_g2	TRINITY_DN86747_c3_g2	TRINITY_DN90053_c0_g1		TRINITY_DN91736_c1_g1	TRINITY_DN86859_c1_g2
TRINITY_DN79257_c0_g1	TRINITY_DN79614_c1_g5	TRINITY_DN70144_c3_g2	TRINITY_DN73655_c0_g2	TRINITY_DN72400_c1_g3	TRINITY_DN97055_c4_g1	TRINITY_DN96727_c3_g2	TRINITY_DN92372_c0_g2	TRINITY_DN95402_c1_g2	TRINITY_DN88799_c0_g1		TRINITY_DN90070_c0_g1	TRINITY_DN82265_c0_g1
TRINITY_DN87089_c0_g3	TRINITY_DN69787_c0_g2	TRINITY_DN95669_c1_g5	TRINITY_DN74540_c0_g1	TRINITY_DN74003_c1_g1	TRINITY_DN95772_c0_g1	TRINITY_DN74321_c0_g4	TRINITY_DN97814_c1_g1	TRINITY_DN75679_c6_g1	TRINITY_DN75046_c0_g1		TRINITY_DN84750_c0_g5	TRINITY_DN91867_c0_g3
TRINITY_DN97888_c3_g1	TRINITY_DN93377_c1_g1	TRINITY_DN80478_c1_g1	TRINITY_DN89294_c1_g2	TRINITY_DN77696_c1_g1	TRINITY_DN87122_c0_g1	TRINITY_DN72670_c0_g1	TRINITY_DN91171_c0_g1	TRINITY_DN72552_c1_g2	TRINITY_DN82573_c1_g1		TRINITY_DN92237_c0_g5	TRINITY_DN93428_c1_g2
TRINITY_DN71268_c0_g1	TRINITY_DN66670_c0_g1	TRINITY_DN85670_c1_g1	TRINITY_DN82325_c0_g1	TRINITY_DN93926_c0_g2	TRINITY_DN83084_c0_g1	TRINITY_DN74280_c0_g1	TRINITY_DN92571_c0_g2	TRINITY_DN93263_c1_g5	TRINITY_DN70511_c0_g2		TRINITY_DN96028_c0_g1	TRINITY_DN92846_c0_g1
TRINITY_DN68828_c0_g2	TRINITY_DN87473_c0_g3	TRINITY_DN92245_c1_g1	TRINITY_DN69522_c5_g1	TRINITY_DN69670_c0_g1	TRINITY_DN94737_c2_g1	TRINITY_DN75004_c0_g2	TRINITY_DN66062_c0_g1	TRINITY_DN80400_c0_g2	TRINITY_DN76439_c0_g2		TRINITY_DN92852_c0_g3	TRINITY_DN95643_c0_g1
TRINITY_DN97761_c2_g6	TRINITY_DN96248_c1_g4	TRINITY_DN90906_c0_g2	TRINITY_DN98912_c1_g5	TRINITY_DN89789_c1_g3	TRINITY_DN90578_c1_g2	TRINITY_DN92182_c0_g1	TRINITY_DN69167_c3_g1	TRINITY_DN81196_c1_g3	TRINITY_DN81397_c0_g1		TRINITY_DN84336_c1_g2	TRINITY_DN91867_c0_g1
TRINITY_DN78888_c1_g4	TRINITY_DN92180_c0_g3	TRINITY_DN85736_c2_g1	TRINITY_DN91351_c1_g1	TRINITY_DN95266_c1_g1	TRINITY_DN95261_c0_g2	TRINITY_DN79542_c0_g3	TRINITY_DN80323_c0_g5	TRINITY_DN95416_c2_g2	TRINITY_DN79694_c0_g1		TRINITY_DN79885_c0_g2	TRINITY_DN80976_c3_g1
TRINITY_DN74904_c0_g1	TRINITY_DN98841_c3_g1	TRINITY_DN77676_c0_g4	TRINITY_DN97070_c2_g1	TRINITY_DN94244_c0_g5	TRINITY_DN75029_c0_g2	TRINITY_DN73824_c1_g2	TRINITY_DN79322_c0_g1	TRINITY_DN88158_c0_g1	TRINITY_DN84975_c0_g1		TRINITY_DN79262_c0_g1	TRINITY_DN88818_c0_g3
TRINITY_DN94663_c1_g5	TRINITY_DN74021_c2_g1	TRINITY_DN93277_c0_g5	TRINITY_DN87939_c0_g1	TRINITY_DN74252_c1_g1	TRINITY_DN92335_c0_g2	TRINITY_DN79169_c0_g1	TRINITY_DN77922_c0_g1	TRINITY_DN98731_c8_g1	TRINITY_DN97429_c0_g3		TRINITY_DN70421_c0_g1	TRINITY_DN74165_c1_g1
TRINITY_DN84124_c2_g1	TRINITY_DN76015_c4_g1	TRINITY_DN94921_c1_g3	TRINITY_DN92707_c1_g1	TRINITY_DN97546_c1_g1	TRINITY_DN79681_c0_g2	TRINITY_DN94112_c1_g1	TRINITY_DN70777_c0_g1	TRINITY_DN72926_c0_g4	TRINITY_DN91056_c0_g2		TRINITY_DN95367_c0_g1	TRINITY_DN77983_c0_g1
TRINITY_DN86127_c0_g2	TRINITY_DN93619_c3_g2	TRINITY_DN92027_c0_g1	TRINITY_DN86914_c1_g2	TRINITY_DN83392_c3_g1	TRINITY_DN76818_c3_g1	TRINITY_DN82165_c1_g1	TRINITY_DN90811_c0_g2	TRINITY_DN97691_c3_g1	TRINITY_DN70324_c0_g1		TRINITY_DN93003_c1_g1	TRINITY_DN71103_c0_g2
TRINITY_DN84511_c1_g3	TRINITY_DN99052_c3_g1	TRINITY_DN86492_c0_g2	TRINITY_DN97070_c2_g5	TRINITY_DN69000_c0_g1	TRINITY_DN79440_c0_g1	TRINITY_DN94585_c0_g2	TRINITY_DN70922_c4_g3	TRINITY_DN95946_c1_g4	TRINITY_DN80689_c0_g1		TRINITY_DN88935_c0_g1	TRINITY_DN82982_c0_g1
TRINITY_DN80388_c1_g1	TRINITY_DN66692_c0_g1	TRINITY_DN94896_c1_g4	TRINITY_DN78434_c1_g1	TRINITY_DN92704_c0_g2	TRINITY_DN95669_c1_g1	TRINITY_DN95505_c1_g5	TRINITY_DN75366_c0_g1	TRINITY_DN94294_c3_g4	TRINITY_DN80731_c0_g3		TRINITY_DN80835_c0_g1	TRINITY_DN97689_c3_g1
TRINITY_DN72364_c0_g3	TRINITY_DN98298_c0_g2	TRINITY_DN73337_c1_g1	TRINITY_DN91876_c1_g2	TRINITY_DN71389_c0_g6	TRINITY_DN73991_c0_g1	TRINITY_DN87933_c2_g1	TRINITY_DN67877_c0_g1	TRINITY_DN69762_c0_g1	TRINITY_DN96750_c1_g3		TRINITY_DN97723_c2_g1	TRINITY_DN71754_c3_g7
TRINITY_DN81526_c0_g2	TRINITY_DN96533_c1_g1	TRINITY_DN88366_c1_g3	TRINITY_DN90651_c0_g3	TRINITY_DN89456_c0_g2	TRINITY_DN81602_c1_g11	TRINITY_DN72460_c1_g1	TRINITY_DN77152_c0_g2	TRINITY_DN89941_c3_g3	TRINITY_DN87508_c1_g1		TRINITY_DN97953_c3_g4	TRINITY_DN97182_c2_g1
TRINITY_DN89602_c3_g3	TRINITY_DN85770_c0_g2	TRINITY_DN75321_c0_g1	TRINITY_DN69172_c1_g1	TRINITY_DN82865_c0_g1	TRINITY_DN89274_c2_g1	TRINITY_DN72558_c0_g2	TRINITY_DN97814_c1_g2	TRINITY_DN70144_c2_g1	TRINITY_DN87508_c2_g1		TRINITY_DN91089_c0_g2	TRINITY_DN83845_c1_g1
TRINITY_DN81975_c0_g1	TRINITY_DN92663_c1_g1	TRINITY_DN78028_c0_g4	TRINITY_DN89318_c2_g1	TRINITY_DN74397_c1_g2	TRINITY_DN73323_c2_g2	TRINITY_DN68379_c0_g1	TRINITY_DN71422_c0_g3	TRINITY_DN97368_c3_g2	TRINITY_DN70200_c0_g1		TRINITY_DN92668_c2_g1	TRINITY_DN84292_c0_g1
TRINITY_DN69153_c1_g3	TRINITY_DN90965_c0_g2	TRINITY_DN98360_c2_g1	TRINITY_DN83123_c0_g2	TRINITY_DN75218_c1_g1	TRINITY_DN80846_c1_g2	TRINITY_DN94097_c0_g2	TRINITY_DN74109_c2_g2	TRINITY_DN89183_c1_g7	TRINITY_DN74620_c1_g1		TRINITY_DN99016_c6_g2	TRINITY_DN79822_c0_g3
TRINITY_DN94256_c0_g2	TRINITY_DN84020_c0_g3	TRINITY_DN78387_c0_g3	TRINITY_DN69811_c1_g1	TRINITY_DN78234_c3_g1	TRINITY_DN83892_c0_g3	TRINITY_DN97000_c1_g3	TRINITY_DN81116_c0_g2	TRINITY_DN98106_c6_g1	TRINITY_DN89549_c0_g1		TRINITY_DN84523_c1_g1	TRINITY_DN86534_c1_g1
TRINITY_DN80779_c0_g1	TRINITY_DN87145_c0_g4	TRINITY_DN92571_c0_g1	TRINITY_DN76074_c2_g1	TRINITY_DN88049_c1_g3	TRINITY_DN80802_c0_g2	TRINITY_DN73543_c1_g3	TRINITY_DN89401_c0_g2	TRINITY_DN90390_c0_g2	TRINITY_DN96312_c2_g4		TRINITY_DN90376_c0_g3	TRINITY_DN88604_c0_g1
TRINITY_DN87713_c1_g1	TRINITY_DN93697_c0_g3	TRINITY_DN75607_c1_g1	TRINITY_DN92792_c0_g1	TRINITY_DN93926_c0_g1	TRINITY_DN73954_c1_g1	TRINITY_DN90694_c0_g2	TRINITY_DN82315_c1_g1	TRINITY_DN91067_c1_g3	TRINITY_DN96370_c1_g2		TRINITY_DN97787_c0_g1	TRINITY_DN76841_c1_g1
TRINITY_DN88616_c2_g1	TRINITY_DN78182_c0_g2	TRINITY_DN89318_c2_g2	TRINITY_DN97899_c3_g2	TRINITY_DN84461_c1_g5	TRINITY_DN69976_c0_g1	TRINITY_DN75034_c0_g1	TRINITY_DN74591_c0_g3	TRINITY_DN71477_c0_g1	TRINITY_DN85454_c1_g3		TRINITY_DN86350_c0_g2	TRINITY_DN81590_c1_g1
TRINITY_DN73463_c0_g3	TRINITY_DN98195_c2_g3	TRINITY_DN98013_c1_g1	TRINITY_DN91469_c1_g1	TRINITY_DN83131_c1_g1	TRINITY_DN98692_c2_g2	TRINITY_DN97207_c0_g1	TRINITY_DN97052_c1_g2	TRINITY_DN78237_c0_g3	TRINITY_DN79650_c0_g3		TRINITY_DN73179_c2_g2	TRINITY_DN79884_c1_g3
TRINITY_DN98710_c1_g4	TRINITY_DN95637_c3_g1	TRINITY_DN88167_c0_g3	TRINITY_DN85196_c1_g1	TRINITY_DN96261_c1_g1	TRINITY_DN98792_c4_g1	TRINITY_DN87185_c1_g2	TRINITY_DN73596_c0_g4	TRINITY_DN91683_c1_g1	TRINITY_DN82238_c0_g1		TRINITY_DN98955_c1_g3	TRINITY_DN78900_c2_g1
TRINITY_DN94734_c0_g4	TRINITY_DN74004_c1_g3	TRINITY_DN93348_c0_g2	TRINITY_DN73275_c1_g1	TRINITY_DN79560_c1_g1	TRINITY_DN78303_c0_g2	TRINITY_DN81377_c0_g1	TRINITY_DN90811_c0_g1	TRINITY_DN73671_c3_g1	TRINITY_DN92960_c0_g1		TRINITY_DN87220_c0_g6	TRINITY_DN97285_c2_g1
TRINITY_DN75369_c2_g1	TRINITY_DN91520_c0_g1	TRINITY_DN98297_c2_g1	TRINITY_DN92600_c1_g1	TRINITY_DN92010_c0_g1	TRINITY_DN96348_c3_g1	TRINITY_DN92505_c1_g1	TRINITY_DN98532_c0_g2	TRINITY_DN76972_c2_g4	TRINITY_DN93723_c1_g2		TRINITY_DN98545_c6_g1	TRINITY_DN82608_c0_g3
TRINITY_DN98423_c1_g1	TRINITY_DN78887_c0_g2	TRINITY_DN86925_c1_g3	TRINITY_DN90300_c0_g3	TRINITY_DN98750_c2_g5	TRINITY_DN96357_c1_g3	TRINITY_DN96084_c2_g1	TRINITY_DN87487_c0_g2	TRINITY_DN90488_c0_g2	TRINITY_DN81514_c1_g1		TRINITY_DN94399_c1_g1	TRINITY_DN71177_c1_g1
TRINITY_DN85648_c2_g1	TRINITY_DN98044_c2_g2	TRINITY_DN72157_c2_g1	TRINITY_DN91555_c1_g4	TRINITY_DN79437_c2_g3	TRINITY_DN82605_c0_g1	TRINITY_DN79665_c1_g3	TRINITY_DN80861_c1_g2	TRINITY_DN93410_c0_g2	TRINITY_DN95276_c0_g4		TRINITY_DN75155_c0_g3	TRINITY_DN96468_c1_g1
TRINITY_DN79430_c0_g1	TRINITY_DN71935_c1_g1	TRINITY_DN97572_c2_g1	TRINITY_DN96014_c1_g1	TRINITY_DN95876_c2_g1	TRINITY_DN74821_c0_g3	TRINITY_DN88971_c0_g2	TRINITY_DN79799_c2_g3	TRINITY_DN72630_c2_g1	TRINITY_DN75327_c0_g1		TRINITY_DN83835_c0_g4	TRINITY_DN85872_c0_g2
TRINITY_DN76248_c1_g6	TRINITY_DN85814_c4_g1	TRINITY_DN90427_c2_g1	TRINITY_DN82865_c0_g2	TRINITY_DN90682_c0_g1	TRINITY_DN75786_c1_g1	TRINITY_DN97899_c3_g5	TRINITY_DN78961_c0_g1	TRINITY_DN80896_c0_g2	TRINITY_DN86615_c2_g2		TRINITY_DN71824_c1_g1	TRINITY_DN90972_c5_g1
TRINITY_DN94733_c3_g2	TRINITY_DN89446_c0_g2	TRINITY_DN90725_c1_g2	TRINITY_DN93189_c1_g1	TRINITY_DN88873_c0_g6	TRINITY_DN84726_c1_g3	TRINITY_DN80263_c2_g2	TRINITY_DN81157_c0_g2	TRINITY_DN84694_c0_g1	TRINITY_DN71015_c0_g1		TRINITY_DN77234_c1_g2	TRINITY_DN89432_c0_g2
TRINITY_DN92988_c0_g3	TRINITY_DN96904_c0_g1	TRINITY_DN84644_c2_g1	TRINITY_DN78670_c0_g1	TRINITY_DN81595_c2_g4	TRINITY_DN93640_c0_g1	TRINITY_DN70901_c0_g2	TRINITY_DN89511_c1_g1	TRINITY_DN93376_c1_g3	TRINITY_DN97577_c1_g2		TRINITY_DN87944_c0_g1	TRINITY_DN73690_c0_g4
TRINITY_DN94114_c0_g1	TRINITY_DN86954_c1_g1	TRINITY_DN85432_c1_g3	TRINITY_DN98557_c1_g2	TRINITY_DN70983_c1_g1	TRINITY_DN95692_c0_g2	TRINITY_DN90649_c0_g2	TRINITY_DN73133_c0_g2	TRINITY_DN74724_c1_g1	TRINITY_DN80979_c0_g1		TRINITY_DN98458_c5_g2	TRINITY_DN98175_c1_g1
TRINITY_DN87866_c0_g1	TRINITY_DN90704_c0_g1	TRINITY_DN98878_c2_g2	TRINITY_DN73309_c0_g5	TRINITY_DN68896_c3_g1	TRINITY_DN75506_c0_g3	TRINITY_DN73323_c2_g3	TRINITY_DN91086_c2_g2	TRINITY_DN95276_c0_g3	TRINITY_DN86533_c0_g2		TRINITY_DN88721_c1_g1	TRINITY_DN82008_c0_g5
TRINITY_DN95758_c2_g2	TRINITY_DN71939_c0_g1	TRINITY_DN89864_c0_g2	TRINITY_DN93361_c2_g3	TRINITY_DN74921_c0_g2	TRINITY_DN88930_c0_g3	TRINITY_DN68021_c0_g1	TRINITY_DN93001_c0_g2	TRINITY_DN91282_c3_g1	TRINITY_DN87317_c0_g2		TRINITY_DN99026_c3_g1	TRINITY_DN83492_c1_g8
TRINITY_DN68243_c0_g1	TRINITY_DN79246_c0_g1	TRINITY_DN91981_c1_g1	TRINITY_DN88316_c1_g1	TRINITY_DN87539_c2_g1	TRINITY_DN69854_c0_g1	TRINITY_DN97999_c2_g5	TRINITY_DN97488_c2_g5	TRINITY_DN85278_c0_g3	TRINITY_DN96129_c1_g1		TRINITY_DN97143_c3_g2	TRINITY_DN81096_c1_g2
TRINITY_DN84644_c1_g1	TRINITY_DN96792_c0_g1	TRINITY_DN88299_c0_g3	TRINITY_DN73548_c1_g1	TRINITY_DN77702_c1_g3	TRINITY_DN71520_c3_g2	TRINITY_DN76017_c0_g1	TRINITY_DN71563_c1_g4	TRINITY_DN76499_c1_g4	TRINITY_DN90473_c0_g1		TRINITY_DN91323_c1_g5	TRINITY_DN97285_c2_g3
TRINITY_DN71895_c1_g1	TRINITY_DN96904_c1_g5	TRINITY_DN90387_c0_g1	TRINITY_DN81789_c0_g1	TRINITY_DN91421_c1_g1	TRINITY_DN71016_c0_g1	TRINITY_DN76783_c0_g1	TRINITY_DN82858_c0_g1	TRINITY_DN74006_c2_g1	TRINITY_DN96858_c1_g4		TRINITY_DN96260_c1_g1	TRINITY_DN89739_c1_g2
TRINITY_DN96394_c1_g1	TRINITY_DN68462_c0_g1	TRINITY_DN89722_c0_g2	TRINITY_DN81894_c1_g1	TRINITY_DN98461_c3_g1	TRINITY_DN76228_c1_g1	TRINITY_DN75922_c0_g1	TRINITY_DN96873_c1_g6	TRINITY_DN92061_c1_g2	TRINITY_DN79836_c3_g2		TRINITY_DN77619_c2_g1	TRINITY_DN96952_c1_g2
TRINITY_DN69904_c0_g1	TRINITY_DN76826_c0_g4	TRINITY_DN89061_c0_g2	TRINITY_DN69132_c0_g1	TRINITY_DN97819_c2_g1	TRINITY_DN75796_c0_g2	TRINITY_DN83925_c0_g3	TRINITY_DN93777_c0_g3	TRINITY_DN89835_c0_g3	TRINITY_DN78088_c0_g2		TRINITY_DN91813_c0_g2	TRINITY_DN80680_c2_g1
TRINITY_DN90561_c0_g1	TRINITY_DN97255_c2_g1	TRINITY_DN72523_c1_g1	TRINITY_DN80277_c1_g1	TRINITY_DN77599_c0_g7	TRINITY_DN73847_c1_g8	TRINITY_DN93173_c2_g1	TRINITY_DN83334_c0_g1	TRINITY_DN88175_c0_g4	TRINITY_DN90099_c1_g3		TRINITY_DN89002_c0_g1	TRINITY_DN92700_c0_g3
TRINITY_DN72283_c0_g1	TRINITY_DN85814_c4_g2	TRINITY_DN76095_c0_g1	TRINITY_DN71932_c0_g1	TRINITY_DN92992_c0_g1	TRINITY_DN76034_c0_g2	TRINITY_DN90210_c0_g1	TRINITY_DN85823_c1_g3	TRINITY_DN96661_c3_g2	TRINITY_DN76422_c1_g2		TRINITY_DN89535_c1_g1	TRINITY_DN84596_c2_g1
TRINITY_DN91059_c0_g1	TRINITY_DN74914_c0_g1	TRINITY_DN98100_c1_g4	TRINITY_DN81538_c0_g1	TRINITY_DN78442_c0_g1	TRINITY_DN88288_c1_g2	TRINITY_DN94085_c0_g2	TRINITY_DN71680_c2_g1	TRINITY_DN97097_c0_g1	TRINITY_DN97888_c3_g2		TRINITY_DN82906_c0_g3	TRINITY_DN96138_c1_g1
TRINITY_DN69674_c1_g1	TRINITY_DN96448_c1_g3	TRINITY_DN93824_c0_g1	TRINITY_DN90850_c1_g1	TRINITY_DN97687_c0_g1	TRINITY_DN87802_c0_g1	TRINITY_DN93409_c0_g3	TRINITY_DN82804_c1_g2	TRINITY_DN78237_c0_g2	TRINITY_DN75083_c2_g7		TRINITY_DN87713_c1_g2	TRINITY_DN71888_c0_g4
TRINITY_DN97661_c2_g2	TRINITY_DN79029_c0_g2	TRINITY_DN89571_c0_g2	TRINITY_DN96397_c0_g4	TRINITY_DN81248_c0_g3	TRINITY_DN97372_c2_g1	TRINITY_DN83876_c1_g1	TRINITY_DN82872_c0_g1	TRINITY_DN70566_c0_g1	TRINITY_DN94664_c1_g3		TRINITY_DN87005_c0_g3	TRINITY_DN95086_c0_g2
TRINITY_DN94032_c1_g1	TRINITY_DN69364_c0_g2	TRINITY_DN97411_c0_g2	TRINITY_DN75116_c1_g2	TRINITY_DN92316_c2_g1	TRINITY_DN92583_c2_g3	TRINITY_DN93987_c0_g1	TRINITY_DN87561_c0_g1	TRINITY_DN78222_c0_g4	TRINITY_DN88992_c1_g3		TRINITY_DN74872_c1_g1	TRINITY_DN96747_c1_g3
TRINITY_DN67688_c1_g2	TRINITY_DN93921_c0_g3	TRINITY_DN87474_c0_g1	TRINITY_DN94764_c0_g1	TRINITY_DN73494_c0_g2	TRINITY_DN69900_c0_g1	TRINITY_DN88732_c0_g2	TRINITY_DN91678_c0_g1	TRINITY_DN89727_c3_g3	TRINITY_DN75562_c0_g2		TRINITY_DN90920_c0_g1	TRINITY_DN78648_c2_g2
TRINITY_DN78746_c1_g1	TRINITY_DN97373_c0_g1	TRINITY_DN94895_c1_g3	TRINITY_DN79564_c0_g1	TRINITY_DN85795_c0_g1	TRINITY_DN81346_c3_g2	TRINITY_DN78988_c0_g1	TRINITY_DN75939_c4_g2	TRINITY_DN86194_c2_g1	TRINITY_DN70682_c0_g1		TRINITY_DN86039_c0_g1	TRINITY_DN77430_c4_g3
TRINITY_DN88485_c3_g1	TRINITY_DN86380_c0_g1	TRINITY_DN90491_c0_g1	TRINITY_DN90946_c1_g7	TRINITY_DN98159_c2_g1	TRINITY_DN77383_c1_g1	TRINITY_DN97642_c0_g1	TRINITY_DN87701_c1_g3	TRINITY_DN98508_c6_g2	TRINITY_DN96253_c2_g4		TRINITY_DN98453_c1_g1	TRINITY_DN78985_c2_g1
TRINITY_DN84516_c0_g2	TRINITY_DN81922_c0_g1	TRINITY_DN93555_c0_g1	TRINITY_DN90178_c0_g2	TRINITY_DN88397_c2_g1	TRINITY_DN89745_c0_g1	TRINITY_DN77003_c3_g1	TRINITY_DN86977_c3_g1	TRINITY_DN72843_c3_g1	TRINITY_DN77762_c0_g2		TRINITY_DN78093_c1_g1	TRINITY_DN96792_c1_g2
TRINITY_DN98772_c1_g2	TRINITY_DN96871_c1_g2	TRINITY_DN89858_c0_g1	TRINITY_DN74801_c0_g2	TRINITY_DN98941_c0_g2	TRINITY_DN90438_c0_g6	TRINITY_DN84672_c1_g4	TRINITY_DN81756_c0_g1	TRINITY_DN68279_c1_g1	TRINITY_DN96224_c1_g1		TRINITY_DN95627_c1_g1	TRINITY_DN87160_c0_g1
TRINITY_DN81919_c0_g1	TRINITY_DN94241_c0_g1	TRINITY_DN72537_c1_g1	TRINITY_DN86100_c2_g1	TRINITY_DN80159_c1_g2	TRINITY_DN97348_c2_g4	TRINITY_DN84262_c0_g2	TRINITY_DN94676_c0_g2	TRINITY_DN94090_c2_g2	TRINITY_DN78116_c0_g1		TRINITY_DN96930_c0_g1	TRINITY_DN80323_c0_g2
TRINITY_DN79400_c0_g1	TRINITY_DN89768_c0_g2	TRINITY_DN94475_c0_g1	TRINITY_DN77851_c0_g8	TRINITY_DN79319_c0_g2	TRINITY_DN80421_c1_g2	TRINITY_DN95814_c1_g1	TRINITY_DN84609_c1_g1	TRINITY_DN97858_c5_g1	TRINITY_DN86497_c2_g1		TRINITY_DN98392_c2_g1	TRINITY_DN84032_c0_g1
TRINITY_DN96433_c0_g1	TRINITY_DN99045_c0_g2	TRINITY_DN85651_c1_g3	TRINITY_DN84613_c0_g2	TRINITY_DN89873_c1_g3	TRINITY_DN91222_c1_g1	TRINITY_DN98231_c2_g2	TRINITY_DN72560_c5_g1	TRINITY_DN83368_c1_g3	TRINITY_DN97292_c3_g2		TRINITY_DN71424_c1_g2	TRINITY_DN77511_c1_g1
TRINITY_DN88526_c2_g2	TRINITY_DN90736_c2_g2	TRINITY_DN95312_c0_g2	TRINITY_DN72101_c1_g2	TRINITY_DN79028_c1_g4	TRINITY_DN74751_c1_g1	TRINITY_DN86786_c2_g3	TRINITY_DN67927_c0_g1	TRINITY_DN78018_c0_g1	TRINITY_DN80039_c0_g4		TRINITY_DN92708_c1_g2	TRINITY_DN91670_c0_g1
TRINITY_DN76757_c3_g2	TRINITY_DN76311_c1_g2	TRINITY_DN92244_c0_g2	TRINITY_DN80426_c0_g1	TRINITY_DN77827_c0_g1	TRINITY_DN75140_c0_g1	TRINITY_DN77466_c2_g1	TRINITY_DN87976_c0_g2	TRINITY_DN90121_c2_g3	TRINITY_DN81527_c1_g7		TRINITY_DN98444_c1_g2	TRINITY_DN95422_c2_g3
TRINITY_DN76120_c0_g1	TRINITY_DN79543_c1_g1	TRINITY_DN84539_c0_g2	TRINITY_DN96164_c1_g6	TRINITY_DN85157_c0_g2	TRINITY_DN95606_c0_g1	TRINITY_DN96508_c0_g3	TRINITY_DN91108_c1_g1	TRINITY_DN83362_c0_g2	TRINITY_DN94124_c0_g1		TRINITY_DN73679_c0_g1	TRINITY_DN85833_c1_g1
TRINITY_DN97570_c0_g1	TRINITY_DN83339_c0_g1	TRINITY_DN94939_c2_g1	TRINITY_DN73224_c0_g1	TRINITY_DN96261_c2_g4	TRINITY_DN89249_c1_g1	TRINITY_DN96245_c1_g1	TRINITY_DN71161_c1_g1	TRINITY_DN83222_c1_g1	TRINITY_DN86394_c1_g6		TRINITY_DN74568_c0_g3	TRINITY_DN83985_c0_g4
TRINITY_DN83003_c0_g4	TRINITY_DN82780_c0_g1	TRINITY_DN71237_c2_g2	TRINITY_DN92770_c1_g1		TRINITY_DN95349_c0_g3	TRINITY_DN92351_c2_g2	TRINITY_DN92715_c1_g4	TRINITY_DN86436_c0_g1	TRINITY_DN93815_c1_g2		TRINITY_DN75340_c0_g2	TRINITY_DN80239_c2_g2
TRINITY_DN94051_c0_g3	TRINITY_DN90590_c1_g3	TRINITY_DN94991_c1_g2	TRINITY_DN79413_c2_g2		TRINITY_DN90871_c0_g1	TRINITY_DN76721_c0_g1	TRINITY_DN95378_c1_g2	TRINITY_DN94710_c0_g3	TRINITY_DN91536_c0_g3		TRINITY_DN96097_c3_g4	TRINITY_DN92058_c1_g5
TRINITY_DN89875_c0_g1	TRINITY_DN89232_c0_g3	TRINITY_DN98274_c2_g1	TRINITY_DN96714_c1_g4		TRINITY_DN97577_c0_g2	TRINITY_DN72134_c1_g3	TRINITY_DN82904_c2_g1	TRINITY_DN78222_c0_g3	TRINITY_DN92437_c1_g1		TRINITY_DN86969_c1_g2	TRINITY_DN79076_c0_g3
TRINITY_DN88700_c1_g4	TRINITY_DN82902_c0_g2	TRINITY_DN90631_c0_g1	TRINITY_DN85261_c1_g4		TRINITY_DN90264_c4_g5	TRINITY_DN97111_c2_g2	TRINITY_DN91085_c1_g1	TRINITY_DN79228_c0_g1	TRINITY_DN79556_c0_g1		TRINITY_DN75021_c0_g3	TRINITY_DN81923_c0_g3
TRINITY_DN69028_c0_g1	TRINITY_DN94763_c1_g1	TRINITY_DN91519_c1_g1	TRINITY_DN75608_c0_g2		TRINITY_DN95695_c3_g2	TRINITY_DN79936_c1_g3	TRINITY_DN74808_c1_g2	TRINITY_DN89901_c0_g3	TRINITY_DN57630_c0_g2		TRINITY_DN75408_c0_g1	TRINITY_DN79499_c1_g1
TRINITY_DN91526_c1_g2	TRINITY_DN70233_c4_g4	TRINITY_DN84654_c0_g3	TRINITY_DN79778_c1_g1		TRINITY_DN82441_c0_g1	TRINITY_DN94177_c1_g1	TRINITY_DN71344_c0_g3	TRINITY_DN78322_c0_g5	TRINITY_DN88349_c0_g3		TRINITY_DN97855_c3_g6	TRINITY_DN80680_c2_g2
TRINITY_DN81339_c2_g3	TRINITY_DN77359_c0_g1	TRINITY_DN81004_c0_g6	TRINITY_DN97551_c1_g1		TRINITY_DN96360_c2_g1	TRINITY_DN86948_c1_g1	TRINITY_DN81975_c1_g1		TRINITY_DN85465_c0_g1		TRINITY_DN92357_c0_g3	TRINITY_DN96375_c2_g2
TRINITY_DN84109_c0_g1	TRINITY_DN98939_c1_g1	TRINITY_DN79413_c2_g1	TRINITY_DN90353_c2_g3		TRINITY_DN73594_c0_g2		TRINITY_DN84258_c3_g1		TRINITY_DN96546_c1_g1		TRINITY_DN74697_c0_g6	TRINITY_DN86494_c2_g1
TRINITY_DN68818_c0_g1	TRINITY_DN68524_c0_g1	TRINITY_DN85298_c0_g1	TRINITY_DN91452_c0_g1		TRINITY_DN97736_c3_g1		TRINITY_DN84852_c0_g5		TRINITY_DN98885_c0_g1		TRINITY_DN97761_c2_g3	TRINITY_DN87992_c1_g2
TRINITY_DN80952_c0_g1	TRINITY_DN96763_c2_g3	TRINITY_DN96059_c0_g1	TRINITY_DN95505_c1_g2		TRINITY_DN97656_c0_g1		TRINITY_DN98811_c5_g1		TRINITY_DN93303_c1_g1		TRINITY_DN98607_c2_g1	TRINITY_DN92912_c2_g2
TRINITY_DN97395_c4_g2	TRINITY_DN78180_c1_g1	TRINITY_DN92211_c0_g3	TRINITY_DN93541_c1_g2		TRINITY_DN83320_c1_g4		TRINITY_DN79955_c0_g1		TRINITY_DN80188_c0_g1		TRINITY_DN94663_c1_g2	TRINITY_DN97182_c2_g4
TRINITY_DN75406_c1_g1	TRINITY_DN73736_c1_g2	TRINITY_DN98250_c0_g1	TRINITY_DN86397_c2_g2		TRINITY_DN93660_c2_g6		TRINITY_DN94512_c0_g2		TRINITY_DN80060_c0_g5		TRINITY_DN98258_c0_g1	TRINITY_DN73483_c2_g2
TRINITY_DN76278_c0_g1	TRINITY_DN84795_c0_g2	TRINITY_DN89809_c1_g1	TRINITY_DN74978_c0_g1		TRINITY_DN97462_c3_g1		TRINITY_DN96919_c1_g4		TRINITY_DN98349_c5_g2		TRINITY_DN78453_c0_g1	TRINITY_DN77983_c0_g6
TRINITY_DN79725_c0_g1	TRINITY_DN98730_c4_g2	TRINITY_DN92508_c2_g4	TRINITY_DN73495_c0_g1		TRINITY_DN84683_c2_g4		TRINITY_DN80861_c0_g3		TRINITY_DN96644_c2_g2		TRINITY_DN97225_c1_g1	TRINITY_DN85797_c1_g3
TRINITY_DN93685_c2_g2	TRINITY_DN79758_c0_g1	TRINITY_DN70920_c1_g1	TRINITY_DN69205_c0_g1		TRINITY_DN81347_c0_g1		TRINITY_DN74701_c0_g3		TRINITY_DN98107_c1_g1		TRINITY_DN71889_c1_g1	TRINITY_DN77331_c1_g1
TRINITY_DN68948_c3_g1	TRINITY_DN93921_c0_g2	TRINITY_DN90302_c0_g2	TRINITY_DN80081_c0_g2		TRINITY_DN90763_c2_g1		TRINITY_DN79164_c0_g1		TRINITY_DN82066_c1_g2		TRINITY_DN98137_c2_g1	TRINITY_DN81530_c1_g1
TRINITY_DN88227_c0_g6	TRINITY_DN84933_c1_g1	TRINITY_DN75906_c1_g1	TRINITY_DN94619_c1_g1		TRINITY_DN73192_c0_g1				TRINITY_DN94835_c0_g6		TRINITY_DN80415_c0_g1	TRINITY_DN96276_c1_g1
TRINITY_DN97297_c2_g2	TRINITY_DN98325_c1_g2	TRINITY_DN92426_c0_g2	TRINITY_DN90368_c2_g2		TRINITY_DN74356_c1_g1				TRINITY_DN92372_c0_g3		TRINITY_DN98728_c5_g1	TRINITY_DN78854_c1_g4
TRINITY_DN87533_c3_g2	TRINITY_DN88437_c3_g1	TRINITY_DN92088_c0_g3	TRINITY_DN78914_c0_g1		TRINITY_DN95561_c1_g3				TRINITY_DN94302_c0_g2		TRINITY_DN68440_c0_g2	TRINITY_DN95481_c0_g3
TRINITY_DN78909_c0_g1	TRINITY_DN98829_c0_g2	TRINITY_DN89019_c0_g1	TRINITY_DN97632_c3_g5						TRINITY_DN84751_c1_g1		TRINITY_DN72989_c0_g1	TRINITY_DN97402_c2_g4
TRINITY_DN85887_c3_g1	TRINITY_DN79186_c0_g1	TRINITY_DN72215_c0_g2	TRINITY_DN87745_c4_g2						TRINITY_DN83376_c1_g2		TRINITY_DN80532_c2_g2	TRINITY_DN71984_c1_g3
TRINITY_DN95199_c1_g1	TRINITY_DN78744_c0_g1	TRINITY_DN76054_c1_g2	TRINITY_DN86942_c0_g1						TRINITY_DN92869_c0_g4		TRINITY_DN94383_c0_g1	TRINITY_DN82173_c3_g2
TRINITY_DN79067_c1_g1	TRINITY_DN76639_c2_g1	TRINITY_DN77417_c3_g1	TRINITY_DN98280_c3_g1						TRINITY_DN95976_c0_g2		TRINITY_DN84795_c0_g1	TRINITY_DN88900_c1_g4
TRINITY_DN97893_c1_g1	TRINITY_DN86601_c0_g5	TRINITY_DN79989_c1_g2	TRINITY_DN86609_c2_g3						TRINITY_DN67693_c0_g1		TRINITY_DN84296_c1_g1	TRINITY_DN95632_c3_g2
TRINITY_DN70630_c0_g3	TRINITY_DN83571_c0_g3	TRINITY_DN72636_c1_g1	TRINITY_DN97483_c1_g3						TRINITY_DN98474_c2_g1		TRINITY_DN83880_c2_g1	TRINITY_DN98330_c1_g3
TRINITY_DN93574_c1_g2	TRINITY_DN98338_c2_g3	TRINITY_DN77015_c1_g1	TRINITY_DN84971_c1_g3						TRINITY_DN98209_c2_g6		TRINITY_DN68079_c0_g2	TRINITY_DN96747_c1_g1
TRINITY_DN74044_c0_g3	TRINITY_DN74473_c0_g3	TRINITY_DN93169_c0_g3	TRINITY_DN72317_c1_g1						TRINITY_DN91380_c0_g1		TRINITY_DN95125_c2_g1	TRINITY_DN91619_c0_g2
TRINITY_DN91247_c0_g2	TRINITY_DN79268_c0_g1	TRINITY_DN95972_c2_g3	TRINITY_DN93104_c3_g1						TRINITY_DN79472_c0_g1		TRINITY_DN87095_c0_g2	TRINITY_DN98156_c2_g1
TRINITY_DN73452_c0_g2	TRINITY_DN76268_c0_g1	TRINITY_DN77797_c1_g1	TRINITY_DN74397_c1_g1						TRINITY_DN66135_c0_g1		TRINITY_DN81232_c0_g2	TRINITY_DN92852_c0_g1
TRINITY_DN97060_c3_g1	TRINITY_DN78423_c1_g2	TRINITY_DN87172_c2_g4	TRINITY_DN91931_c0_g1						TRINITY_DN95553_c0_g1		TRINITY_DN94607_c0_g1	TRINITY_DN90826_c0_g4
TRINITY_DN83879_c0_g2	TRINITY_DN92502_c0_g1	TRINITY_DN87231_c1_g1	TRINITY_DN89646_c2_g6						TRINITY_DN92372_c0_g1		TRINITY_DN74996_c0_g1	TRINITY_DN81663_c1_g2
TRINITY_DN78174_c0_g1	TRINITY_DN88752_c2_g1	TRINITY_DN78100_c0_g1	TRINITY_DN90594_c1_g2						TRINITY_DN84852_c0_g1		TRINITY_DN99036_c3_g3	TRINITY_DN77907_c2_g2
TRINITY_DN70858_c1_g2	TRINITY_DN85740_c0_g1	TRINITY_DN85799_c0_g1	TRINITY_DN83943_c0_g1						TRINITY_DN72848_c0_g4		TRINITY_DN90283_c1_g2	TRINITY_DN96952_c1_g3
TRINITY_DN89171_c0_g3	TRINITY_DN96763_c2_g1	TRINITY_DN83786_c0_g1	TRINITY_DN76446_c1_g1						TRINITY_DN73816_c0_g1		TRINITY_DN82502_c0_g3	TRINITY_DN97519_c1_g1
TRINITY_DN78970_c0_g1	TRINITY_DN87385_c2_g1	TRINITY_DN89609_c0_g1	TRINITY_DN75249_c1_g1						TRINITY_DN77168_c0_g1		TRINITY_DN73324_c3_g1	TRINITY_DN95934_c1_g1
TRINITY_DN82439_c1_g2	TRINITY_DN73859_c1_g1	TRINITY_DN95390_c0_g2	TRINITY_DN96397_c0_g3						TRINITY_DN72866_c0_g4		TRINITY_DN96354_c1_g1	TRINITY_DN77511_c1_g2
TRINITY_DN74572_c0_g1	TRINITY_DN82638_c2_g6	TRINITY_DN90319_c0_g1	TRINITY_DN91859_c0_g1						TRINITY_DN90622_c0_g1		TRINITY_DN69671_c1_g2	TRINITY_DN78187_c1_g1
TRINITY_DN96421_c0_g1	TRINITY_DN88980_c1_g1	TRINITY_DN83201_c1_g2	TRINITY_DN97177_c2_g2						TRINITY_DN81310_c0_g2		TRINITY_DN82961_c0_g2	TRINITY_DN90890_c4_g1
TRINITY_DN76993_c2_g2	TRINITY_DN96131_c0_g1	TRINITY_DN92881_c0_g4	TRINITY_DN96205_c3_g1						TRINITY_DN91807_c0_g2		TRINITY_DN82642_c3_g2	TRINITY_DN84691_c3_g3
TRINITY_DN76877_c0_g1	TRINITY_DN90011_c0_g1	TRINITY_DN95312_c0_g1	TRINITY_DN74803_c4_g1						TRINITY_DN84115_c1_g1		TRINITY_DN96418_c1_g1	TRINITY_DN92846_c0_g3
TRINITY_DN87317_c0_g1	TRINITY_DN78333_c1_g1	TRINITY_DN96641_c0_g1	TRINITY_DN79053_c1_g1						TRINITY_DN81649_c0_g1		TRINITY_DN78811_c0_g5	TRINITY_DN80323_c0_g1
TRINITY_DN91106_c0_g2	TRINITY_DN93697_c0_g2	TRINITY_DN94351_c0_g2	TRINITY_DN78103_c0_g2						TRINITY_DN84719_c0_g4		TRINITY_DN95188_c0_g1	TRINITY_DN91877_c1_g1
TRINITY_DN83556_c1_g2	TRINITY_DN84843_c0_g3	TRINITY_DN83864_c3_g1	TRINITY_DN69848_c1_g4						TRINITY_DN80550_c2_g1		TRINITY_DN85980_c1_g1	TRINITY_DN78295_c0_g1
TRINITY_DN92660_c0_g5	TRINITY_DN96190_c0_g2	TRINITY_DN73550_c1_g1	TRINITY_DN83531_c2_g1						TRINITY_DN89891_c0_g3		TRINITY_DN77469_c0_g1	TRINITY_DN79745_c0_g1
TRINITY_DN78703_c0_g1	TRINITY_DN70849_c0_g1	TRINITY_DN89788_c0_g1	TRINITY_DN75467_c1_g1						TRINITY_DN96447_c1_g2		TRINITY_DN74847_c0_g1	TRINITY_DN97285_c2_g2
TRINITY_DN68673_c1_g1	TRINITY_DN90223_c0_g1	TRINITY_DN96097_c3_g1	TRINITY_DN81110_c3_g1						TRINITY_DN73821_c1_g2		TRINITY_DN97052_c1_g4	TRINITY_DN85738_c1_g2
TRINITY_DN84755_c0_g3	TRINITY_DN94700_c2_g3	TRINITY_DN70628_c4_g1	TRINITY_DN72195_c1_g2						TRINITY_DN76248_c1_g3		TRINITY_DN86210_c0_g1	TRINITY_DN91682_c0_g1
TRINITY_DN94032_c0_g1	TRINITY_DN89334_c0_g4	TRINITY_DN88507_c0_g4	TRINITY_DN68311_c0_g1						TRINITY_DN94313_c3_g1		TRINITY_DN95050_c1_g2	TRINITY_DN77944_c0_g3
TRINITY_DN74096_c0_g1	TRINITY_DN90808_c0_g1	TRINITY_DN89881_c1_g1	TRINITY_DN78927_c1_g2						TRINITY_DN98060_c2_g1		TRINITY_DN97602_c1_g1	TRINITY_DN68068_c0_g1
TRINITY_DN77098_c1_g3	TRINITY_DN84177_c3_g1	TRINITY_DN76035_c3_g1	TRINITY_DN84848_c3_g2						TRINITY_DN72290_c0_g1		TRINITY_DN84924_c0_g1	TRINITY_DN77029_c3_g3
TRINITY_DN80329_c0_g3	TRINITY_DN76101_c0_g2	TRINITY_DN96024_c2_g1	TRINITY_DN86403_c0_g7						TRINITY_DN96041_c0_g1		TRINITY_DN96416_c1_g2	TRINITY_DN79185_c0_g2
TRINITY_DN83476_c0_g2	TRINITY_DN75989_c1_g1	TRINITY_DN98751_c0_g3	TRINITY_DN89990_c2_g2						TRINITY_DN86525_c0_g4		TRINITY_DN91372_c0_g4	TRINITY_DN96091_c1_g2
TRINITY_DN92931_c1_g2	TRINITY_DN87479_c2_g5	TRINITY_DN70028_c0_g1	TRINITY_DN85709_c1_g1						TRINITY_DN94898_c1_g2		TRINITY_DN93850_c1_g5	TRINITY_DN90096_c0_g2
TRINITY_DN80142_c0_g1	TRINITY_DN98348_c0_g1	TRINITY_DN93927_c0_g2	TRINITY_DN92126_c2_g2						TRINITY_DN82307_c1_g1		TRINITY_DN80494_c0_g1	TRINITY_DN94449_c1_g1
TRINITY_DN83747_c0_g4	TRINITY_DN69466_c1_g6	TRINITY_DN87831_c0_g1	TRINITY_DN70799_c1_g1						TRINITY_DN92434_c0_g2		TRINITY_DN90270_c0_g2	TRINITY_DN88700_c0_g1
TRINITY_DN88119_c1_g2	TRINITY_DN71257_c4_g8	TRINITY_DN93996_c0_g1	TRINITY_DN89111_c1_g1						TRINITY_DN80685_c0_g3		TRINITY_DN85720_c1_g1	TRINITY_DN86000_c1_g2
TRINITY_DN74599_c2_g1	TRINITY_DN70307_c3_g1	TRINITY_DN87678_c0_g1	TRINITY_DN75722_c5_g1						TRINITY_DN82321_c3_g3		TRINITY_DN74461_c0_g1	TRINITY_DN78777_c0_g1
TRINITY_DN76849_c0_g2	TRINITY_DN89537_c0_g3	TRINITY_DN74869_c0_g1	TRINITY_DN85487_c0_g2						TRINITY_DN95429_c0_g2		TRINITY_DN80794_c0_g1	TRINITY_DN87314_c0_g2
TRINITY_DN74422_c1_g3	TRINITY_DN92466_c0_g1	TRINITY_DN84750_c0_g2	TRINITY_DN90073_c0_g5						TRINITY_DN75542_c1_g1		TRINITY_DN77169_c0_g2	TRINITY_DN85265_c0_g1
TRINITY_DN83826_c1_g2	TRINITY_DN73444_c1_g2	TRINITY_DN93493_c1_g1	TRINITY_DN71478_c0_g1						TRINITY_DN93739_c0_g3		TRINITY_DN76353_c1_g1	TRINITY_DN82021_c1_g3
TRINITY_DN88155_c0_g2	TRINITY_DN98499_c2_g1	TRINITY_DN68398_c0_g3	TRINITY_DN95269_c0_g2						TRINITY_DN83823_c0_g1		TRINITY_DN87069_c0_g2	TRINITY_DN78659_c3_g1
TRINITY_DN79232_c0_g1	TRINITY_DN96299_c0_g4	TRINITY_DN81167_c1_g2	TRINITY_DN79390_c3_g1						TRINITY_DN92816_c0_g3		TRINITY_DN87019_c0_g1	TRINITY_DN96180_c1_g1
TRINITY_DN90833_c0_g1	TRINITY_DN79508_c0_g1	TRINITY_DN96509_c3_g1	TRINITY_DN75068_c0_g3						TRINITY_DN78252_c0_g1		TRINITY_DN82781_c0_g1	TRINITY_DN92846_c0_g2
TRINITY_DN80550_c2_g2	TRINITY_DN98939_c2_g1	TRINITY_DN78119_c1_g1	TRINITY_DN79809_c4_g1						TRINITY_DN73369_c1_g1		TRINITY_DN97970_c2_g1	TRINITY_DN83701_c1_g5
TRINITY_DN93922_c1_g2	TRINITY_DN83856_c1_g6	TRINITY_DN82819_c2_g3	TRINITY_DN90672_c0_g2						TRINITY_DN91056_c1_g1		TRINITY_DN96704_c2_g2	TRINITY_DN76913_c1_g1
TRINITY_DN78468_c0_g2	TRINITY_DN70233_c4_g5	TRINITY_DN89482_c0_g1	TRINITY_DN90000_c1_g1						TRINITY_DN95492_c0_g1		TRINITY_DN97121_c1_g1	TRINITY_DN97392_c2_g1
TRINITY_DN98393_c0_g1	TRINITY_DN91019_c5_g3	TRINITY_DN83666_c1_g4	TRINITY_DN88144_c0_g1						TRINITY_DN77660_c3_g2		TRINITY_DN80370_c4_g5	TRINITY_DN81272_c0_g2
TRINITY_DN80830_c0_g2	TRINITY_DN82446_c2_g1	TRINITY_DN79355_c0_g3	TRINITY_DN82308_c1_g3						TRINITY_DN94312_c1_g1		TRINITY_DN92254_c1_g2	TRINITY_DN97408_c5_g3
TRINITY_DN82569_c0_g2	TRINITY_DN96824_c2_g1	TRINITY_DN72292_c0_g2	TRINITY_DN98875_c3_g2						TRINITY_DN73572_c0_g1		TRINITY_DN92826_c0_g1	TRINITY_DN69540_c1_g2
TRINITY_DN93170_c1_g1	TRINITY_DN89926_c0_g3	TRINITY_DN73054_c1_g1	TRINITY_DN97038_c1_g1						TRINITY_DN97048_c1_g2		TRINITY_DN72444_c0_g1	TRINITY_DN83114_c1_g2
TRINITY_DN93419_c0_g1	TRINITY_DN81262_c1_g4	TRINITY_DN90710_c0_g1	TRINITY_DN97552_c2_g1						TRINITY_DN91245_c2_g1		TRINITY_DN98212_c0_g1	TRINITY_DN87479_c2_g1
TRINITY_DN97448_c1_g1	TRINITY_DN87225_c1_g1	TRINITY_DN92070_c1_g1	TRINITY_DN97609_c1_g2						TRINITY_DN86304_c0_g1		TRINITY_DN71291_c1_g1	TRINITY_DN90587_c1_g6
TRINITY_DN81390_c1_g1	TRINITY_DN89594_c0_g1	TRINITY_DN85881_c3_g1	TRINITY_DN71187_c2_g1						TRINITY_DN93413_c1_g1		TRINITY_DN79475_c1_g2	TRINITY_DN97367_c1_g2
TRINITY_DN88526_c2_g1	TRINITY_DN96472_c1_g1	TRINITY_DN93655_c0_g1	TRINITY_DN98284_c5_g1						TRINITY_DN70691_c0_g1		TRINITY_DN75706_c0_g2	TRINITY_DN91817_c1_g1
TRINITY_DN78212_c1_g2	TRINITY_DN83985_c0_g2	TRINITY_DN95415_c1_g1	TRINITY_DN88793_c2_g3						TRINITY_DN94302_c0_g3		TRINITY_DN94594_c0_g1	TRINITY_DN79887_c2_g1
TRINITY_DN80805_c0_g1	TRINITY_DN96423_c3_g1	TRINITY_DN93107_c1_g1	TRINITY_DN77231_c0_g1						TRINITY_DN81895_c1_g1		TRINITY_DN80708_c0_g1	TRINITY_DN92905_c0_g2
TRINITY_DN71447_c0_g2	TRINITY_DN85610_c1_g4	TRINITY_DN67315_c0_g4	TRINITY_DN91145_c0_g2						TRINITY_DN75010_c0_g5		TRINITY_DN68224_c1_g5	TRINITY_DN88896_c0_g6
TRINITY_DN88926_c1_g1	TRINITY_DN98865_c5_g1	TRINITY_DN95977_c1_g2	TRINITY_DN90772_c1_g2						TRINITY_DN96932_c2_g2		TRINITY_DN77910_c1_g1	TRINITY_DN71403_c2_g1
TRINITY_DN75139_c0_g1	TRINITY_DN95134_c2_g2	TRINITY_DN87392_c0_g2	TRINITY_DN73846_c1_g1						TRINITY_DN86363_c0_g1		TRINITY_DN87405_c1_g1	TRINITY_DN92340_c1_g1
TRINITY_DN90248_c0_g1	TRINITY_DN87900_c1_g3	TRINITY_DN80234_c0_g1	TRINITY_DN88299_c0_g1						TRINITY_DN67887_c0_g1		TRINITY_DN85031_c0_g2	TRINITY_DN95727_c1_g1
TRINITY_DN94198_c0_g2	TRINITY_DN96855_c2_g2	TRINITY_DN76300_c1_g1	TRINITY_DN95646_c1_g2						TRINITY_DN92893_c0_g1		TRINITY_DN95877_c0_g1	TRINITY_DN98877_c1_g5
TRINITY_DN97992_c3_g1	TRINITY_DN89869_c0_g4	TRINITY_DN88489_c0_g2	TRINITY_DN76474_c0_g5						TRINITY_DN86666_c1_g1		TRINITY_DN97626_c2_g1	TRINITY_DN75860_c0_g1
TRINITY_DN68985_c2_g2	TRINITY_DN90301_c3_g6	TRINITY_DN97953_c3_g1	TRINITY_DN97339_c1_g3						TRINITY_DN75850_c1_g4		TRINITY_DN97398_c2_g2	TRINITY_DN73171_c2_g1
TRINITY_DN94069_c0_g1	TRINITY_DN76329_c1_g1	TRINITY_DN83623_c0_g6	TRINITY_DN85261_c1_g5						TRINITY_DN91234_c2_g2		TRINITY_DN95564_c1_g1	TRINITY_DN77268_c0_g7
TRINITY_DN94334_c0_g1	TRINITY_DN97538_c0_g4	TRINITY_DN93979_c0_g1	TRINITY_DN96397_c0_g5						TRINITY_DN84027_c0_g3		TRINITY_DN77435_c0_g5	TRINITY_DN77092_c1_g2
TRINITY_DN91039_c0_g1	TRINITY_DN70565_c3_g1	TRINITY_DN82818_c0_g1	TRINITY_DN91776_c1_g1						TRINITY_DN98417_c2_g3		TRINITY_DN93966_c0_g4	TRINITY_DN86912_c2_g4
TRINITY_DN80583_c0_g1	TRINITY_DN81720_c4_g2	TRINITY_DN98183_c1_g1	TRINITY_DN88501_c0_g2						TRINITY_DN76333_c0_g3		TRINITY_DN92499_c0_g2	TRINITY_DN98156_c2_g3
TRINITY_DN74923_c0_g5	TRINITY_DN97805_c0_g1	TRINITY_DN76615_c2_g1	TRINITY_DN69141_c0_g1						TRINITY_DN74519_c0_g3		TRINITY_DN86230_c0_g2	TRINITY_DN92126_c2_g3
TRINITY_DN83162_c2_g1	TRINITY_DN90791_c0_g2	TRINITY_DN69590_c0_g1	TRINITY_DN81370_c0_g1						TRINITY_DN97613_c1_g1		TRINITY_DN91821_c1_g1	TRINITY_DN99018_c0_g1
TRINITY_DN72058_c0_g1	TRINITY_DN91314_c0_g2	TRINITY_DN92884_c0_g1	TRINITY_DN85672_c0_g5						TRINITY_DN90796_c1_g3		TRINITY_DN69153_c1_g1	TRINITY_DN83443_c0_g7
TRINITY_DN78227_c0_g4	TRINITY_DN75330_c0_g5	TRINITY_DN86093_c0_g4	TRINITY_DN93119_c0_g2						TRINITY_DN96000_c1_g2		TRINITY_DN84714_c0_g1	TRINITY_DN91619_c0_g1
TRINITY_DN89686_c0_g4	TRINITY_DN86616_c2_g2	TRINITY_DN91376_c0_g1	TRINITY_DN89321_c0_g1						TRINITY_DN91103_c0_g2		TRINITY_DN98764_c5_g3	TRINITY_DN82008_c0_g3
TRINITY_DN80893_c3_g2	TRINITY_DN72488_c1_g1	TRINITY_DN83412_c0_g5	TRINITY_DN77093_c0_g1						TRINITY_DN74152_c2_g2		TRINITY_DN90781_c0_g2	TRINITY_DN72446_c1_g1
TRINITY_DN92335_c0_g5	TRINITY_DN81880_c1_g2	TRINITY_DN97545_c1_g1	TRINITY_DN82017_c0_g1						TRINITY_DN82701_c0_g1		TRINITY_DN80907_c1_g1	TRINITY_DN89345_c0_g1
TRINITY_DN68404_c0_g1	TRINITY_DN71837_c1_g3	TRINITY_DN76691_c5_g1	TRINITY_DN92169_c2_g1						TRINITY_DN98381_c1_g4		TRINITY_DN84079_c0_g1	TRINITY_DN85672_c0_g1
TRINITY_DN67716_c0_g1	TRINITY_DN97587_c1_g3	TRINITY_DN86619_c3_g3	TRINITY_DN85740_c1_g2						TRINITY_DN84275_c1_g1		TRINITY_DN79188_c0_g2	TRINITY_DN87406_c0_g2
TRINITY_DN97252_c3_g1	TRINITY_DN85610_c1_g2	TRINITY_DN98846_c5_g1	TRINITY_DN89661_c0_g2						TRINITY_DN86668_c1_g1		TRINITY_DN77469_c0_g4	TRINITY_DN77593_c0_g1
TRINITY_DN95405_c1_g1	TRINITY_DN93921_c0_g1	TRINITY_DN82806_c1_g1	TRINITY_DN93694_c0_g2						TRINITY_DN86658_c1_g1		TRINITY_DN95773_c0_g3	TRINITY_DN98074_c1_g1
TRINITY_DN97479_c1_g4	TRINITY_DN75932_c0_g1	TRINITY_DN93220_c0_g1	TRINITY_DN92611_c2_g2						TRINITY_DN86228_c0_g1		TRINITY_DN97128_c2_g2	TRINITY_DN71108_c0_g2
TRINITY_DN95500_c1_g1	TRINITY_DN90217_c0_g3	TRINITY_DN74200_c0_g1	TRINITY_DN84021_c0_g1						TRINITY_DN79712_c0_g2		TRINITY_DN92246_c2_g1	TRINITY_DN81471_c0_g1
TRINITY_DN97065_c2_g1	TRINITY_DN78317_c2_g1	TRINITY_DN86149_c0_g2	TRINITY_DN69619_c0_g1						TRINITY_DN93713_c1_g2		TRINITY_DN98448_c0_g1	TRINITY_DN76118_c0_g3
TRINITY_DN75385_c0_g2	TRINITY_DN89581_c0_g4	TRINITY_DN88273_c1_g1	TRINITY_DN92097_c1_g3						TRINITY_DN94362_c0_g2		TRINITY_DN96506_c0_g5	TRINITY_DN74015_c0_g7
TRINITY_DN73559_c1_g3	TRINITY_DN89276_c0_g2	TRINITY_DN91089_c0_g1	TRINITY_DN91555_c1_g1						TRINITY_DN85706_c1_g1		TRINITY_DN73679_c1_g2	TRINITY_DN82021_c1_g5
TRINITY_DN75391_c1_g1	TRINITY_DN96966_c0_g1	TRINITY_DN93574_c1_g6	TRINITY_DN81279_c2_g6						TRINITY_DN70433_c0_g1		TRINITY_DN78877_c1_g1	TRINITY_DN95759_c0_g1
TRINITY_DN76965_c1_g1	TRINITY_DN96115_c0_g6	TRINITY_DN97542_c2_g3	TRINITY_DN80663_c3_g5						TRINITY_DN98151_c2_g2		TRINITY_DN93699_c0_g1	TRINITY_DN97538_c0_g3
TRINITY_DN79298_c0_g1	TRINITY_DN98028_c2_g4	TRINITY_DN93491_c0_g3	TRINITY_DN93262_c0_g2						TRINITY_DN89121_c0_g1		TRINITY_DN97073_c2_g2	TRINITY_DN79291_c2_g4
TRINITY_DN79433_c0_g2	TRINITY_DN72327_c1_g1	TRINITY_DN97533_c1_g2	TRINITY_DN80500_c1_g3						TRINITY_DN91592_c0_g4		TRINITY_DN70854_c0_g1	TRINITY_DN90946_c1_g3
TRINITY_DN87659_c2_g5	TRINITY_DN89714_c1_g1	TRINITY_DN98323_c1_g2	TRINITY_DN68570_c0_g1						TRINITY_DN86383_c1_g2		TRINITY_DN83585_c1_g1	TRINITY_DN78594_c0_g4
TRINITY_DN74066_c0_g1	TRINITY_DN88293_c1_g1	TRINITY_DN81246_c0_g1	TRINITY_DN82396_c0_g1						TRINITY_DN84214_c0_g5		TRINITY_DN88387_c0_g1	TRINITY_DN88502_c1_g2
TRINITY_DN75942_c1_g3	TRINITY_DN98326_c3_g2	TRINITY_DN87355_c0_g1	TRINITY_DN82219_c5_g2						TRINITY_DN69923_c1_g3		TRINITY_DN78240_c2_g4	TRINITY_DN83757_c0_g1
TRINITY_DN74627_c4_g1	TRINITY_DN78854_c0_g1	TRINITY_DN77434_c2_g1	TRINITY_DN89503_c0_g1						TRINITY_DN90641_c0_g2		TRINITY_DN90929_c0_g2	TRINITY_DN98503_c1_g2
TRINITY_DN81623_c1_g1	TRINITY_DN96468_c1_g2	TRINITY_DN88150_c0_g2	TRINITY_DN86966_c1_g1						TRINITY_DN77872_c0_g1		TRINITY_DN83104_c0_g1	TRINITY_DN86043_c0_g1
TRINITY_DN88669_c0_g2	TRINITY_DN96792_c1_g1	TRINITY_DN90560_c0_g1	TRINITY_DN92859_c0_g1						TRINITY_DN70495_c0_g3		TRINITY_DN66987_c0_g1	TRINITY_DN91670_c0_g3
TRINITY_DN91917_c1_g3	TRINITY_DN98605_c0_g1	TRINITY_DN73172_c2_g2	TRINITY_DN78606_c2_g3						TRINITY_DN72851_c1_g1		TRINITY_DN74762_c1_g1	TRINITY_DN94010_c1_g5
TRINITY_DN76925_c1_g1	TRINITY_DN98020_c0_g3	TRINITY_DN85924_c0_g1	TRINITY_DN70654_c1_g1						TRINITY_DN85137_c0_g1		TRINITY_DN97161_c2_g1	TRINITY_DN96538_c1_g1
TRINITY_DN94892_c0_g3	TRINITY_DN95583_c1_g4	TRINITY_DN75945_c1_g2	TRINITY_DN84026_c0_g1						TRINITY_DN85481_c1_g1		TRINITY_DN80083_c0_g1	TRINITY_DN97519_c1_g2
TRINITY_DN97888_c3_g3	TRINITY_DN85905_c2_g1	TRINITY_DN96515_c0_g2	TRINITY_DN80910_c2_g1						TRINITY_DN88663_c0_g1		TRINITY_DN72598_c0_g1	TRINITY_DN95444_c1_g4
TRINITY_DN85851_c1_g2	TRINITY_DN96654_c1_g1	TRINITY_DN95082_c1_g1	TRINITY_DN82844_c3_g1						TRINITY_DN80823_c0_g2		TRINITY_DN94323_c0_g1	TRINITY_DN98205_c1_g1
TRINITY_DN79347_c1_g1	TRINITY_DN97349_c1_g1	TRINITY_DN98334_c3_g2	TRINITY_DN92488_c1_g1						TRINITY_DN80946_c2_g1		TRINITY_DN95217_c0_g3	TRINITY_DN86897_c0_g1
TRINITY_DN95299_c0_g1	TRINITY_DN88983_c0_g2	TRINITY_DN78028_c0_g2	TRINITY_DN77662_c0_g1						TRINITY_DN98154_c1_g1		TRINITY_DN70725_c1_g7	TRINITY_DN89408_c2_g2
TRINITY_DN93275_c1_g1	TRINITY_DN89295_c2_g2	TRINITY_DN93991_c0_g1	TRINITY_DN75678_c2_g1						TRINITY_DN95996_c1_g3		TRINITY_DN80520_c0_g1	TRINITY_DN75338_c1_g4
TRINITY_DN85713_c1_g1	TRINITY_DN81298_c1_g1	TRINITY_DN84380_c1_g2	TRINITY_DN78134_c0_g1						TRINITY_DN77838_c0_g1		TRINITY_DN83833_c0_g4	TRINITY_DN86601_c0_g1
TRINITY_DN85022_c0_g1	TRINITY_DN77576_c1_g1	TRINITY_DN72380_c3_g2	TRINITY_DN77526_c0_g1						TRINITY_DN88801_c0_g1		TRINITY_DN72303_c0_g1	TRINITY_DN86787_c1_g4
TRINITY_DN94947_c2_g6	TRINITY_DN73736_c0_g3	TRINITY_DN95641_c0_g1	TRINITY_DN88992_c0_g1						TRINITY_DN79799_c2_g2		TRINITY_DN89317_c0_g1	TRINITY_DN91815_c2_g3
TRINITY_DN71482_c1_g2	TRINITY_DN87607_c2_g1	TRINITY_DN96266_c0_g3	TRINITY_DN88428_c2_g1						TRINITY_DN83596_c0_g2		TRINITY_DN71958_c2_g1	TRINITY_DN92559_c0_g2
TRINITY_DN89041_c0_g2	TRINITY_DN95632_c3_g1	TRINITY_DN92258_c0_g1	TRINITY_DN67713_c0_g1						TRINITY_DN87390_c0_g2		TRINITY_DN85693_c0_g2	TRINITY_DN86439_c2_g4
TRINITY_DN86930_c0_g1	TRINITY_DN92413_c1_g2	TRINITY_DN85830_c0_g2	TRINITY_DN85899_c4_g1						TRINITY_DN69822_c0_g1		TRINITY_DN73615_c0_g1	TRINITY_DN82473_c0_g1
TRINITY_DN77465_c0_g1	TRINITY_DN69810_c0_g1	TRINITY_DN95156_c1_g6	TRINITY_DN77591_c0_g2						TRINITY_DN90236_c0_g1		TRINITY_DN76130_c0_g2	TRINITY_DN75852_c0_g1
TRINITY_DN92341_c1_g1	TRINITY_DN72220_c1_g1	TRINITY_DN74653_c1_g1	TRINITY_DN88141_c0_g1						TRINITY_DN73332_c1_g1		TRINITY_DN71061_c2_g3	TRINITY_DN82010_c0_g1
TRINITY_DN81338_c1_g1	TRINITY_DN71515_c1_g1	TRINITY_DN93576_c0_g1	TRINITY_DN95880_c0_g1						TRINITY_DN92893_c0_g2		TRINITY_DN98371_c1_g2	TRINITY_DN68097_c0_g1
TRINITY_DN88317_c0_g1	TRINITY_DN70857_c2_g1	TRINITY_DN79294_c1_g1	TRINITY_DN73282_c0_g1						TRINITY_DN80528_c2_g2		TRINITY_DN92450_c0_g2	TRINITY_DN74378_c1_g11
TRINITY_DN94899_c4_g1	TRINITY_DN81262_c1_g2	TRINITY_DN92770_c1_g7	TRINITY_DN77493_c0_g1						TRINITY_DN76420_c1_g1		TRINITY_DN70911_c2_g1	TRINITY_DN95169_c1_g1
TRINITY_DN69839_c1_g1	TRINITY_DN84487_c4_g1	TRINITY_DN77712_c1_g2	TRINITY_DN96305_c0_g2						TRINITY_DN90732_c1_g1		TRINITY_DN84469_c1_g1	TRINITY_DN89508_c1_g1
TRINITY_DN92277_c1_g1	TRINITY_DN98028_c1_g2	TRINITY_DN71122_c2_g1	TRINITY_DN82927_c2_g2						TRINITY_DN93815_c1_g1		TRINITY_DN88786_c0_g1	TRINITY_DN92614_c1_g5
TRINITY_DN94239_c2_g1	TRINITY_DN91344_c2_g1	TRINITY_DN89280_c3_g1	TRINITY_DN88776_c0_g2						TRINITY_DN71959_c1_g3		TRINITY_DN98313_c2_g6	TRINITY_DN89232_c0_g2
TRINITY_DN70709_c0_g1	TRINITY_DN83076_c2_g1	TRINITY_DN89931_c1_g2	TRINITY_DN89646_c2_g4						TRINITY_DN71636_c2_g4		TRINITY_DN71903_c0_g1	TRINITY_DN91621_c1_g5
TRINITY_DN83224_c0_g1	TRINITY_DN75843_c2_g4	TRINITY_DN86661_c0_g2	TRINITY_DN95837_c0_g1						TRINITY_DN75386_c0_g2		TRINITY_DN87928_c1_g1	TRINITY_DN88634_c0_g3
TRINITY_DN70028_c0_g2	TRINITY_DN98347_c2_g3	TRINITY_DN97261_c2_g1	TRINITY_DN81212_c1_g1						TRINITY_DN69539_c0_g1		TRINITY_DN89487_c0_g3	TRINITY_DN93543_c0_g4
TRINITY_DN78356_c0_g1	TRINITY_DN86536_c2_g3	TRINITY_DN95945_c1_g3	TRINITY_DN86153_c0_g4						TRINITY_DN96711_c0_g1		TRINITY_DN93820_c0_g1	TRINITY_DN69762_c0_g3
TRINITY_DN98831_c4_g2	TRINITY_DN92607_c0_g1	TRINITY_DN81378_c4_g2	TRINITY_DN95015_c0_g1						TRINITY_DN88163_c1_g1		TRINITY_DN91978_c1_g2	TRINITY_DN71396_c2_g3
TRINITY_DN97778_c2_g1	TRINITY_DN74158_c0_g2	TRINITY_DN83740_c0_g1	TRINITY_DN77956_c0_g1						TRINITY_DN70159_c0_g2		TRINITY_DN87843_c0_g2	TRINITY_DN82333_c0_g1
TRINITY_DN92053_c3_g1	TRINITY_DN95971_c1_g2	TRINITY_DN94113_c0_g1	TRINITY_DN75146_c2_g2						TRINITY_DN91834_c1_g2		TRINITY_DN94340_c0_g1	TRINITY_DN73201_c1_g2
TRINITY_DN77265_c2_g1	TRINITY_DN85636_c0_g2	TRINITY_DN89570_c0_g3	TRINITY_DN81448_c0_g2						TRINITY_DN98320_c3_g2		TRINITY_DN98187_c0_g1	TRINITY_DN88946_c2_g1
TRINITY_DN85914_c2_g4	TRINITY_DN76510_c0_g1	TRINITY_DN81758_c0_g3	TRINITY_DN89329_c2_g2						TRINITY_DN90388_c4_g2		TRINITY_DN85946_c2_g2	TRINITY_DN78185_c1_g2
TRINITY_DN95973_c2_g1	TRINITY_DN91972_c0_g3	TRINITY_DN79501_c0_g3	TRINITY_DN70243_c0_g1						TRINITY_DN85447_c0_g1		TRINITY_DN85221_c0_g1	TRINITY_DN83023_c0_g1
TRINITY_DN94032_c1_g4	TRINITY_DN82022_c3_g1	TRINITY_DN73100_c1_g1	TRINITY_DN95089_c0_g2						TRINITY_DN86307_c1_g2		TRINITY_DN93943_c0_g3	TRINITY_DN98692_c2_g5
TRINITY_DN85851_c1_g1	TRINITY_DN77755_c1_g2	TRINITY_DN96698_c0_g2	TRINITY_DN88516_c0_g3						TRINITY_DN93077_c0_g3		TRINITY_DN68390_c3_g1	TRINITY_DN74868_c0_g1
TRINITY_DN72829_c1_g1	TRINITY_DN81484_c0_g1	TRINITY_DN97211_c2_g2	TRINITY_DN70668_c0_g2						TRINITY_DN92666_c1_g1		TRINITY_DN75340_c0_g3	TRINITY_DN91902_c4_g2
TRINITY_DN95264_c1_g3	TRINITY_DN78792_c1_g5	TRINITY_DN70082_c0_g1	TRINITY_DN90480_c1_g1						TRINITY_DN91949_c0_g2		TRINITY_DN93760_c2_g1	TRINITY_DN89537_c0_g2
TRINITY_DN81189_c0_g3	TRINITY_DN82073_c0_g3	TRINITY_DN97054_c2_g1	TRINITY_DN81614_c0_g3						TRINITY_DN91246_c0_g3		TRINITY_DN76045_c0_g1	TRINITY_DN84362_c0_g2
TRINITY_DN87695_c0_g1	TRINITY_DN89733_c0_g3	TRINITY_DN91519_c1_g2	TRINITY_DN95656_c0_g1						TRINITY_DN79874_c1_g4		TRINITY_DN95847_c0_g1	TRINITY_DN84029_c0_g1
TRINITY_DN85297_c0_g2	TRINITY_DN94394_c0_g3	TRINITY_DN80570_c2_g3	TRINITY_DN94995_c1_g3						TRINITY_DN72301_c1_g2		TRINITY_DN94389_c0_g3	TRINITY_DN73270_c0_g1
TRINITY_DN94878_c0_g2	TRINITY_DN91314_c0_g1	TRINITY_DN95233_c1_g6	TRINITY_DN98366_c2_g1						TRINITY_DN71384_c2_g2		TRINITY_DN96369_c2_g1	TRINITY_DN79493_c5_g1
TRINITY_DN71726_c1_g2	TRINITY_DN91114_c3_g1	TRINITY_DN97505_c0_g1	TRINITY_DN73467_c0_g1						TRINITY_DN98526_c5_g1		TRINITY_DN92418_c0_g2	TRINITY_DN73218_c0_g7
TRINITY_DN98352_c1_g3	TRINITY_DN96190_c0_g3	TRINITY_DN76682_c1_g1	TRINITY_DN89247_c1_g2						TRINITY_DN98161_c2_g1		TRINITY_DN94077_c0_g1	TRINITY_DN83701_c1_g4
TRINITY_DN96443_c1_g2	TRINITY_DN80888_c0_g1	TRINITY_DN66964_c0_g1	TRINITY_DN92261_c2_g1						TRINITY_DN92666_c1_g2		TRINITY_DN97128_c2_g1	TRINITY_DN89521_c1_g4
TRINITY_DN96353_c0_g1	TRINITY_DN90331_c0_g1	TRINITY_DN79538_c1_g1	TRINITY_DN80104_c0_g1						TRINITY_DN87743_c1_g2		TRINITY_DN91742_c0_g3	TRINITY_DN82104_c3_g7
TRINITY_DN71590_c1_g3	TRINITY_DN77362_c1_g1	TRINITY_DN93055_c1_g1	TRINITY_DN90644_c1_g2						TRINITY_DN78488_c0_g3		TRINITY_DN95629_c0_g1	TRINITY_DN82021_c1_g2
TRINITY_DN84797_c1_g1	TRINITY_DN92832_c0_g2	TRINITY_DN68814_c0_g1	TRINITY_DN87419_c0_g1						TRINITY_DN97769_c2_g1		TRINITY_DN94345_c0_g1	TRINITY_DN95611_c1_g2
TRINITY_DN93791_c2_g2	TRINITY_DN94379_c1_g1	TRINITY_DN98447_c0_g4	TRINITY_DN94113_c0_g2						TRINITY_DN69798_c1_g1		TRINITY_DN88225_c4_g2	TRINITY_DN70983_c2_g1
TRINITY_DN83114_c0_g2	TRINITY_DN93365_c2_g1	TRINITY_DN87215_c3_g1	TRINITY_DN87834_c0_g1						TRINITY_DN98506_c3_g3		TRINITY_DN90918_c0_g2	TRINITY_DN76849_c1_g2
TRINITY_DN95391_c0_g3	TRINITY_DN95351_c1_g4	TRINITY_DN91316_c3_g3	TRINITY_DN79519_c1_g1						TRINITY_DN74458_c0_g2		TRINITY_DN92488_c0_g1	TRINITY_DN90468_c0_g1
TRINITY_DN85640_c5_g1	TRINITY_DN81769_c1_g1	TRINITY_DN71674_c0_g6	TRINITY_DN97634_c0_g1						TRINITY_DN73841_c1_g1		TRINITY_DN86504_c0_g1	TRINITY_DN98135_c0_g1
TRINITY_DN76615_c4_g3	TRINITY_DN88394_c2_g2	TRINITY_DN93890_c1_g2	TRINITY_DN73343_c2_g1						TRINITY_DN81780_c0_g1		TRINITY_DN88748_c0_g4	TRINITY_DN93500_c1_g1
TRINITY_DN94806_c1_g2	TRINITY_DN78971_c1_g3	TRINITY_DN70865_c1_g3	TRINITY_DN76302_c0_g1						TRINITY_DN94416_c1_g1		TRINITY_DN83889_c0_g2	TRINITY_DN73895_c0_g1
TRINITY_DN99048_c9_g2	TRINITY_DN97788_c2_g4	TRINITY_DN94130_c1_g5	TRINITY_DN82374_c1_g3						TRINITY_DN92333_c0_g2		TRINITY_DN84104_c2_g4	TRINITY_DN78920_c2_g1
TRINITY_DN83618_c1_g1	TRINITY_DN76752_c0_g2	TRINITY_DN79067_c1_g2	TRINITY_DN83887_c2_g1						TRINITY_DN67458_c0_g1		TRINITY_DN73145_c2_g1	TRINITY_DN75411_c0_g2
TRINITY_DN93142_c0_g1	TRINITY_DN76668_c0_g1	TRINITY_DN84301_c0_g2	TRINITY_DN83277_c0_g1						TRINITY_DN92174_c0_g3		TRINITY_DN85146_c1_g1	TRINITY_DN95898_c0_g2
TRINITY_DN92234_c0_g1	TRINITY_DN80727_c0_g1	TRINITY_DN83953_c0_g1	TRINITY_DN97697_c2_g1						TRINITY_DN74837_c0_g1		TRINITY_DN90678_c2_g1	TRINITY_DN89431_c1_g1
TRINITY_DN90880_c1_g2	TRINITY_DN90496_c0_g2	TRINITY_DN98358_c2_g1	TRINITY_DN83000_c3_g3						TRINITY_DN69672_c0_g2		TRINITY_DN82827_c1_g2	TRINITY_DN79240_c2_g1
TRINITY_DN93765_c1_g2	TRINITY_DN97009_c1_g3	TRINITY_DN68505_c0_g1	TRINITY_DN74639_c0_g1						TRINITY_DN98138_c0_g2		TRINITY_DN92330_c1_g2	TRINITY_DN75168_c2_g4
TRINITY_DN89084_c0_g1	TRINITY_DN89446_c0_g3	TRINITY_DN89690_c1_g1	TRINITY_DN79821_c0_g1						TRINITY_DN83906_c0_g1		TRINITY_DN80080_c1_g3	TRINITY_DN79303_c0_g1
TRINITY_DN98827_c8_g1	TRINITY_DN91256_c1_g1	TRINITY_DN80826_c1_g2	TRINITY_DN91289_c1_g1						TRINITY_DN83631_c1_g5		TRINITY_DN70156_c0_g5	TRINITY_DN71588_c1_g1
TRINITY_DN79445_c0_g2	TRINITY_DN95701_c0_g1	TRINITY_DN72698_c1_g2	TRINITY_DN72842_c1_g2						TRINITY_DN72811_c0_g1		TRINITY_DN88243_c1_g4	TRINITY_DN94597_c0_g4
TRINITY_DN71891_c0_g1	TRINITY_DN89999_c0_g3	TRINITY_DN94226_c0_g1	TRINITY_DN76888_c1_g2						TRINITY_DN96750_c2_g1		TRINITY_DN74494_c0_g1	TRINITY_DN75984_c1_g1
TRINITY_DN73405_c1_g1	TRINITY_DN77541_c1_g2	TRINITY_DN78164_c0_g1	TRINITY_DN89822_c0_g2						TRINITY_DN53144_c0_g1		TRINITY_DN77743_c0_g1	TRINITY_DN91665_c1_g3
TRINITY_DN79083_c0_g1	TRINITY_DN89334_c0_g1	TRINITY_DN93641_c2_g2	TRINITY_DN82810_c0_g2						TRINITY_DN98618_c6_g3		TRINITY_DN85742_c1_g1	TRINITY_DN95101_c0_g1
TRINITY_DN94969_c1_g1	TRINITY_DN68933_c0_g2	TRINITY_DN79006_c1_g2	TRINITY_DN88332_c0_g1						TRINITY_DN94754_c2_g1		TRINITY_DN75078_c1_g1	TRINITY_DN95273_c1_g1
TRINITY_DN83797_c0_g2	TRINITY_DN78879_c1_g1	TRINITY_DN95226_c1_g4	TRINITY_DN80380_c0_g1						TRINITY_DN71639_c0_g1		TRINITY_DN91545_c0_g4	TRINITY_DN93243_c1_g7
TRINITY_DN92135_c2_g1	TRINITY_DN91523_c0_g2	TRINITY_DN87791_c3_g1	TRINITY_DN87276_c0_g2						TRINITY_DN84150_c1_g1		TRINITY_DN96159_c1_g1	TRINITY_DN75477_c0_g2
TRINITY_DN95695_c3_g1	TRINITY_DN73331_c1_g5	TRINITY_DN93404_c0_g1	TRINITY_DN81751_c0_g1						TRINITY_DN80627_c1_g4		TRINITY_DN68475_c0_g1	TRINITY_DN67633_c0_g1
TRINITY_DN95473_c1_g1	TRINITY_DN72076_c0_g2	TRINITY_DN88664_c4_g1	TRINITY_DN76377_c1_g1						TRINITY_DN79953_c2_g1		TRINITY_DN85095_c1_g3	TRINITY_DN88820_c1_g3
TRINITY_DN92881_c0_g2	TRINITY_DN90888_c3_g2	TRINITY_DN93218_c0_g2	TRINITY_DN91307_c0_g3						TRINITY_DN74724_c0_g3		TRINITY_DN96246_c1_g3	TRINITY_DN85457_c1_g1
TRINITY_DN93227_c0_g1	TRINITY_DN97803_c1_g4	TRINITY_DN94056_c2_g2	TRINITY_DN76891_c2_g5						TRINITY_DN83769_c0_g3		TRINITY_DN77651_c0_g1	TRINITY_DN72344_c1_g2
TRINITY_DN83271_c0_g3	TRINITY_DN78676_c1_g2	TRINITY_DN96091_c1_g3	TRINITY_DN88876_c0_g1						TRINITY_DN95543_c1_g1		TRINITY_DN98277_c2_g1	TRINITY_DN94496_c1_g1
TRINITY_DN92776_c1_g3	TRINITY_DN95270_c0_g7	TRINITY_DN84750_c0_g6	TRINITY_DN95432_c1_g2						TRINITY_DN73347_c1_g1		TRINITY_DN94287_c2_g1	TRINITY_DN89889_c0_g1
TRINITY_DN75426_c1_g1	TRINITY_DN78843_c0_g1	TRINITY_DN82884_c0_g1	TRINITY_DN91897_c0_g5						TRINITY_DN78747_c1_g1		TRINITY_DN98107_c1_g3	TRINITY_DN76097_c2_g1
TRINITY_DN95879_c1_g1	TRINITY_DN91044_c5_g1	TRINITY_DN86143_c0_g1	TRINITY_DN83844_c1_g1						TRINITY_DN71353_c4_g2		TRINITY_DN84900_c1_g3	TRINITY_DN77435_c0_g2
TRINITY_DN73258_c1_g4	TRINITY_DN70804_c0_g1	TRINITY_DN89252_c0_g1	TRINITY_DN95426_c0_g1						TRINITY_DN89688_c1_g1		TRINITY_DN95651_c1_g3	TRINITY_DN81774_c2_g2
TRINITY_DN71198_c0_g1	TRINITY_DN76512_c4_g1	TRINITY_DN73043_c1_g1	TRINITY_DN74347_c0_g2						TRINITY_DN93447_c0_g1		TRINITY_DN74503_c1_g2	TRINITY_DN79495_c5_g1
TRINITY_DN96512_c0_g3	TRINITY_DN85169_c0_g3	TRINITY_DN94767_c0_g1	TRINITY_DN98648_c2_g1						TRINITY_DN94124_c0_g3		TRINITY_DN75121_c0_g4	TRINITY_DN69952_c1_g3
TRINITY_DN94306_c0_g1	TRINITY_DN67363_c1_g2	TRINITY_DN98738_c6_g1	TRINITY_DN85695_c2_g2						TRINITY_DN91875_c1_g1		TRINITY_DN71554_c0_g1	TRINITY_DN82039_c0_g2
TRINITY_DN73596_c0_g2	TRINITY_DN90604_c0_g1	TRINITY_DN91844_c1_g1	TRINITY_DN79306_c1_g3						TRINITY_DN73054_c1_g3		TRINITY_DN92233_c0_g2	TRINITY_DN79242_c2_g1
	TRINITY_DN83674_c1_g1	TRINITY_DN69818_c1_g1	TRINITY_DN70749_c0_g1						TRINITY_DN79088_c0_g3		TRINITY_DN96506_c0_g1	TRINITY_DN89431_c1_g2
	TRINITY_DN91185_c1_g2	TRINITY_DN92611_c2_g1	TRINITY_DN84953_c0_g1						TRINITY_DN75819_c0_g2		TRINITY_DN93827_c1_g1	TRINITY_DN94401_c0_g1
	TRINITY_DN84753_c1_g2	TRINITY_DN96881_c2_g2	TRINITY_DN88961_c0_g2						TRINITY_DN89095_c1_g2		TRINITY_DN94703_c0_g2	TRINITY_DN85142_c0_g4
	TRINITY_DN76095_c0_g2	TRINITY_DN87582_c0_g2	TRINITY_DN84993_c1_g3						TRINITY_DN95963_c2_g8		TRINITY_DN76839_c0_g1	TRINITY_DN82546_c2_g1
	TRINITY_DN93566_c0_g2	TRINITY_DN86241_c1_g1	TRINITY_DN74634_c1_g1						TRINITY_DN84458_c1_g1		TRINITY_DN94216_c0_g2	TRINITY_DN78502_c2_g2
	TRINITY_DN87802_c0_g3	TRINITY_DN70046_c1_g3	TRINITY_DN69074_c0_g1						TRINITY_DN83883_c0_g1		TRINITY_DN79849_c1_g1	TRINITY_DN76663_c0_g1
	TRINITY_DN97687_c2_g2	TRINITY_DN80103_c0_g2	TRINITY_DN77436_c1_g2						TRINITY_DN73394_c0_g1		TRINITY_DN90006_c0_g2	TRINITY_DN93901_c2_g1
	TRINITY_DN93809_c0_g1	TRINITY_DN94200_c1_g4	TRINITY_DN88340_c1_g1						TRINITY_DN86197_c2_g6		TRINITY_DN93707_c1_g1	TRINITY_DN74441_c0_g2
	TRINITY_DN85588_c2_g3	TRINITY_DN76261_c0_g1	TRINITY_DN68053_c0_g1						TRINITY_DN73767_c1_g3		TRINITY_DN96474_c1_g1	TRINITY_DN75262_c2_g2
	TRINITY_DN74149_c1_g2	TRINITY_DN96500_c4_g1	TRINITY_DN72925_c0_g1						TRINITY_DN98356_c2_g1		TRINITY_DN87125_c0_g3	TRINITY_DN74211_c0_g1
	TRINITY_DN94221_c0_g2	TRINITY_DN79675_c0_g3	TRINITY_DN83855_c0_g1						TRINITY_DN69692_c0_g1		TRINITY_DN98228_c0_g1	TRINITY_DN85421_c0_g1
	TRINITY_DN98491_c5_g1	TRINITY_DN64487_c0_g1	TRINITY_DN95055_c0_g3						TRINITY_DN92333_c0_g1		TRINITY_DN96037_c1_g1	TRINITY_DN78532_c1_g3
	TRINITY_DN71891_c1_g3	TRINITY_DN89338_c2_g1	TRINITY_DN81058_c2_g3						TRINITY_DN86680_c0_g1		TRINITY_DN90554_c1_g1	TRINITY_DN78002_c4_g4
	TRINITY_DN90581_c0_g3	TRINITY_DN89257_c0_g1	TRINITY_DN72873_c0_g1						TRINITY_DN87042_c0_g1		TRINITY_DN97602_c1_g2	TRINITY_DN86091_c1_g2
	TRINITY_DN92751_c0_g1	TRINITY_DN79251_c0_g3	TRINITY_DN78989_c2_g3						TRINITY_DN93464_c1_g1		TRINITY_DN98582_c6_g1	TRINITY_DN96409_c4_g1
	TRINITY_DN89886_c1_g6	TRINITY_DN71764_c2_g1	TRINITY_DN90282_c1_g1						TRINITY_DN97213_c1_g1		TRINITY_DN88465_c1_g2	TRINITY_DN87502_c0_g1
	TRINITY_DN88528_c1_g1	TRINITY_DN99029_c8_g1	TRINITY_DN88998_c0_g1						TRINITY_DN74517_c0_g1		TRINITY_DN95094_c0_g3	TRINITY_DN93281_c2_g1
	TRINITY_DN96454_c1_g3	TRINITY_DN93565_c0_g3	TRINITY_DN91698_c0_g1						TRINITY_DN98604_c1_g1		TRINITY_DN90609_c0_g3	TRINITY_DN89163_c0_g2
	TRINITY_DN94259_c3_g1	TRINITY_DN81885_c0_g1	TRINITY_DN92339_c0_g2						TRINITY_DN95995_c1_g3		TRINITY_DN69416_c2_g1	TRINITY_DN67385_c0_g2
	TRINITY_DN75571_c1_g2	TRINITY_DN84072_c1_g2	TRINITY_DN95362_c1_g1						TRINITY_DN87195_c1_g1		TRINITY_DN81114_c0_g2	TRINITY_DN91082_c0_g1
	TRINITY_DN95921_c2_g1	TRINITY_DN83336_c1_g1	TRINITY_DN93139_c0_g1						TRINITY_DN65951_c0_g1		TRINITY_DN94197_c1_g2	TRINITY_DN87415_c1_g1
	TRINITY_DN75379_c0_g7	TRINITY_DN78040_c0_g1	TRINITY_DN95518_c0_g1						TRINITY_DN93957_c0_g2		TRINITY_DN85648_c2_g3	TRINITY_DN72804_c1_g5
	TRINITY_DN72526_c0_g2	TRINITY_DN76246_c1_g1	TRINITY_DN94175_c0_g1						TRINITY_DN86391_c0_g1		TRINITY_DN86674_c0_g3	TRINITY_DN81287_c0_g4
	TRINITY_DN97568_c0_g1	TRINITY_DN85709_c1_g2	TRINITY_DN89205_c2_g3						TRINITY_DN93413_c0_g1		TRINITY_DN72604_c1_g1	TRINITY_DN75839_c0_g1
	TRINITY_DN90281_c0_g1	TRINITY_DN77430_c4_g1	TRINITY_DN88279_c0_g2						TRINITY_DN94881_c1_g2		TRINITY_DN78319_c0_g1	TRINITY_DN78408_c4_g3
	TRINITY_DN90413_c0_g1	TRINITY_DN89362_c2_g2	TRINITY_DN95944_c2_g1						TRINITY_DN73705_c0_g1		TRINITY_DN98917_c1_g1	TRINITY_DN85253_c1_g3
	TRINITY_DN87118_c0_g3	TRINITY_DN85785_c2_g1	TRINITY_DN89068_c0_g3						TRINITY_DN81058_c2_g1		TRINITY_DN89712_c0_g4	TRINITY_DN94401_c0_g2
	TRINITY_DN91962_c0_g1	TRINITY_DN98033_c2_g1	TRINITY_DN83053_c0_g4						TRINITY_DN98107_c1_g2		TRINITY_DN89152_c2_g1	TRINITY_DN75419_c0_g2
	TRINITY_DN77178_c0_g3	TRINITY_DN91770_c0_g2	TRINITY_DN88743_c0_g3						TRINITY_DN95648_c2_g2		TRINITY_DN94878_c0_g1	TRINITY_DN69499_c0_g2
	TRINITY_DN95981_c1_g1	TRINITY_DN94926_c2_g6	TRINITY_DN88281_c0_g2						TRINITY_DN91841_c2_g1		TRINITY_DN95593_c0_g5	TRINITY_DN86774_c0_g6
	TRINITY_DN84782_c0_g1	TRINITY_DN93070_c1_g1	TRINITY_DN96106_c0_g2						TRINITY_DN95976_c0_g3		TRINITY_DN88738_c0_g1	TRINITY_DN87372_c2_g2
	TRINITY_DN82688_c0_g1	TRINITY_DN86581_c0_g1	TRINITY_DN73251_c1_g1						TRINITY_DN68365_c0_g1		TRINITY_DN83441_c0_g1	TRINITY_DN85765_c0_g1
	TRINITY_DN92188_c0_g4	TRINITY_DN92316_c1_g2	TRINITY_DN95618_c1_g3						TRINITY_DN93906_c3_g5		TRINITY_DN91037_c2_g3	TRINITY_DN87025_c2_g1
	TRINITY_DN87076_c1_g6	TRINITY_DN73846_c0_g1	TRINITY_DN88084_c0_g1						TRINITY_DN95009_c1_g3		TRINITY_DN96797_c0_g4	TRINITY_DN88854_c0_g5
	TRINITY_DN77209_c1_g1	TRINITY_DN83797_c1_g1	TRINITY_DN87405_c1_g2						TRINITY_DN73526_c1_g1		TRINITY_DN94380_c0_g1	TRINITY_DN79677_c1_g1
	TRINITY_DN83935_c0_g1	TRINITY_DN82026_c0_g1	TRINITY_DN77641_c3_g1						TRINITY_DN84835_c1_g1		TRINITY_DN95694_c1_g1	TRINITY_DN71169_c1_g1
	TRINITY_DN87065_c0_g1	TRINITY_DN93214_c3_g1	TRINITY_DN97073_c1_g1						TRINITY_DN84444_c0_g1		TRINITY_DN91758_c3_g4	TRINITY_DN95551_c0_g1
	TRINITY_DN88980_c1_g3	TRINITY_DN84947_c1_g1	TRINITY_DN82600_c0_g2						TRINITY_DN91847_c0_g1		TRINITY_DN83562_c1_g1	TRINITY_DN94887_c2_g1
	TRINITY_DN88305_c0_g1	TRINITY_DN74194_c0_g1	TRINITY_DN77309_c0_g2						TRINITY_DN92767_c0_g1		TRINITY_DN76970_c1_g3	TRINITY_DN77362_c1_g2
	TRINITY_DN65800_c0_g1	TRINITY_DN98101_c5_g3	TRINITY_DN71625_c0_g1						TRINITY_DN72492_c0_g1		TRINITY_DN93227_c0_g4	TRINITY_DN74295_c0_g1
	TRINITY_DN83723_c0_g2	TRINITY_DN90724_c2_g2	TRINITY_DN86998_c1_g4						TRINITY_DN87291_c1_g2		TRINITY_DN86171_c1_g1	TRINITY_DN83210_c1_g1
	TRINITY_DN81735_c1_g1	TRINITY_DN94905_c2_g1	TRINITY_DN70909_c0_g1						TRINITY_DN77984_c0_g3		TRINITY_DN85340_c1_g1	TRINITY_DN78386_c0_g3
	TRINITY_DN75309_c0_g1	TRINITY_DN95052_c1_g1	TRINITY_DN82354_c0_g2						TRINITY_DN97323_c1_g1		TRINITY_DN82769_c1_g2	TRINITY_DN95114_c1_g4
	TRINITY_DN81650_c1_g2	TRINITY_DN71217_c0_g2	TRINITY_DN82275_c0_g1						TRINITY_DN83708_c0_g1		TRINITY_DN73893_c0_g3	TRINITY_DN72127_c1_g4
	TRINITY_DN82302_c0_g1	TRINITY_DN75549_c1_g1	TRINITY_DN96960_c0_g1								TRINITY_DN94629_c2_g1	TRINITY_DN97346_c1_g1
	TRINITY_DN90811_c1_g1	TRINITY_DN78965_c2_g1	TRINITY_DN70298_c0_g1								TRINITY_DN72834_c0_g4	TRINITY_DN90292_c0_g1
	TRINITY_DN87940_c4_g2	TRINITY_DN84431_c0_g1	TRINITY_DN97958_c3_g2								TRINITY_DN93904_c1_g2	TRINITY_DN72569_c0_g1
	TRINITY_DN94287_c2_g2	TRINITY_DN88663_c1_g3	TRINITY_DN97177_c2_g1								TRINITY_DN76414_c0_g3	TRINITY_DN72269_c0_g2
	TRINITY_DN97341_c0_g1	TRINITY_DN98223_c1_g1	TRINITY_DN91958_c0_g1								TRINITY_DN95789_c0_g4	TRINITY_DN96075_c1_g2
	TRINITY_DN83642_c0_g3	TRINITY_DN93339_c1_g3	TRINITY_DN99059_c18_g2								TRINITY_DN97077_c0_g1	TRINITY_DN90995_c0_g1
	TRINITY_DN92485_c2_g1	TRINITY_DN86771_c0_g3	TRINITY_DN74339_c1_g5								TRINITY_DN91464_c3_g1	TRINITY_DN68641_c2_g1
	TRINITY_DN86912_c2_g5	TRINITY_DN79175_c3_g4	TRINITY_DN73695_c0_g3								TRINITY_DN68255_c0_g1	TRINITY_DN92345_c0_g1
	TRINITY_DN95134_c2_g1	TRINITY_DN79269_c0_g2	TRINITY_DN98702_c3_g2								TRINITY_DN92139_c4_g1	TRINITY_DN88896_c0_g1
	TRINITY_DN98607_c2_g3	TRINITY_DN97383_c1_g2	TRINITY_DN87515_c0_g1								TRINITY_DN79959_c0_g2	TRINITY_DN95447_c0_g4
	TRINITY_DN91609_c1_g3	TRINITY_DN92587_c2_g1	TRINITY_DN78974_c0_g1								TRINITY_DN96171_c0_g1	TRINITY_DN75990_c1_g1
	TRINITY_DN79205_c2_g1	TRINITY_DN80478_c1_g2	TRINITY_DN98449_c3_g2								TRINITY_DN98381_c1_g2	TRINITY_DN77493_c0_g2
	TRINITY_DN87700_c2_g1	TRINITY_DN90624_c0_g1	TRINITY_DN83433_c0_g3								TRINITY_DN95226_c1_g1	TRINITY_DN97507_c1_g1
	TRINITY_DN71341_c0_g1	TRINITY_DN84810_c0_g1	TRINITY_DN91281_c0_g3								TRINITY_DN96892_c2_g1	TRINITY_DN92677_c0_g3
	TRINITY_DN88391_c1_g1	TRINITY_DN86634_c0_g1	TRINITY_DN75002_c1_g1								TRINITY_DN98770_c4_g3	TRINITY_DN80705_c0_g1
	TRINITY_DN80137_c0_g4	TRINITY_DN96411_c0_g1	TRINITY_DN90589_c0_g1								TRINITY_DN68390_c3_g2	TRINITY_DN81862_c1_g3
	TRINITY_DN92477_c1_g3	TRINITY_DN94314_c0_g1	TRINITY_DN94748_c1_g1								TRINITY_DN77018_c3_g1	TRINITY_DN94388_c0_g1
	TRINITY_DN88582_c0_g1	TRINITY_DN92715_c0_g1	TRINITY_DN92530_c0_g3								TRINITY_DN75718_c1_g1	TRINITY_DN66672_c0_g1
	TRINITY_DN95981_c1_g2	TRINITY_DN85272_c0_g4	TRINITY_DN84399_c0_g1								TRINITY_DN85895_c0_g1	TRINITY_DN83096_c0_g2
	TRINITY_DN69998_c2_g1	TRINITY_DN88798_c0_g1	TRINITY_DN95074_c0_g1								TRINITY_DN94172_c0_g1	TRINITY_DN97087_c3_g2
	TRINITY_DN95385_c0_g1	TRINITY_DN93928_c0_g2	TRINITY_DN78303_c0_g1								TRINITY_DN93667_c0_g2	TRINITY_DN95848_c1_g2
	TRINITY_DN93481_c2_g1	TRINITY_DN89646_c2_g2	TRINITY_DN94994_c0_g1								TRINITY_DN81857_c0_g1	TRINITY_DN90069_c1_g1
	TRINITY_DN92938_c1_g1	TRINITY_DN81997_c0_g1	TRINITY_DN71575_c0_g6								TRINITY_DN97768_c0_g2	TRINITY_DN72607_c0_g1
	TRINITY_DN81495_c0_g6	TRINITY_DN86602_c1_g1	TRINITY_DN91380_c1_g1								TRINITY_DN77296_c1_g1	TRINITY_DN81287_c0_g2
	TRINITY_DN83642_c0_g1	TRINITY_DN86244_c1_g1	TRINITY_DN96188_c1_g2								TRINITY_DN71807_c0_g2	TRINITY_DN84305_c5_g2
	TRINITY_DN92437_c1_g2	TRINITY_DN83304_c1_g1	TRINITY_DN73616_c0_g4								TRINITY_DN81502_c0_g2	TRINITY_DN98450_c2_g1
	TRINITY_DN75787_c0_g2	TRINITY_DN73767_c0_g2	TRINITY_DN97096_c2_g2								TRINITY_DN92972_c1_g1	TRINITY_DN92380_c0_g1
	TRINITY_DN69291_c2_g2	TRINITY_DN96600_c2_g1	TRINITY_DN94016_c0_g3								TRINITY_DN75228_c3_g1	TRINITY_DN87256_c1_g1
	TRINITY_DN95689_c0_g1	TRINITY_DN92363_c0_g2	TRINITY_DN81001_c3_g8								TRINITY_DN70599_c1_g3	TRINITY_DN79493_c5_g2
	TRINITY_DN72988_c0_g3	TRINITY_DN97821_c1_g1	TRINITY_DN84395_c0_g2								TRINITY_DN81058_c1_g1	TRINITY_DN80003_c0_g1
	TRINITY_DN96302_c0_g1	TRINITY_DN74771_c0_g1	TRINITY_DN86229_c1_g3								TRINITY_DN93153_c0_g2	TRINITY_DN89504_c0_g1
	TRINITY_DN75330_c0_g2	TRINITY_DN80698_c2_g3	TRINITY_DN93630_c4_g1								TRINITY_DN97262_c0_g2	TRINITY_DN89029_c3_g8
	TRINITY_DN80104_c0_g2	TRINITY_DN86548_c0_g1	TRINITY_DN92430_c1_g1								TRINITY_DN77929_c0_g2	TRINITY_DN95921_c1_g1
	TRINITY_DN98928_c2_g3	TRINITY_DN91155_c0_g1	TRINITY_DN95614_c2_g1								TRINITY_DN81567_c2_g1	TRINITY_DN85426_c3_g4
	TRINITY_DN88289_c0_g3	TRINITY_DN95401_c3_g3	TRINITY_DN78722_c0_g3								TRINITY_DN93568_c0_g4	TRINITY_DN79588_c2_g1
	TRINITY_DN75236_c1_g4	TRINITY_DN93380_c0_g1	TRINITY_DN82753_c0_g1								TRINITY_DN96835_c0_g1	TRINITY_DN94047_c0_g3
	TRINITY_DN88179_c1_g2	TRINITY_DN74748_c3_g2	TRINITY_DN77313_c3_g1								TRINITY_DN71284_c1_g1	TRINITY_DN97301_c0_g1
	TRINITY_DN86394_c1_g1	TRINITY_DN79971_c3_g2	TRINITY_DN97684_c3_g5								TRINITY_DN86555_c0_g2	TRINITY_DN79779_c1_g1
	TRINITY_DN81741_c0_g1	TRINITY_DN93237_c1_g1	TRINITY_DN73208_c1_g1								TRINITY_DN84353_c0_g2	TRINITY_DN72497_c0_g1
	TRINITY_DN82413_c0_g2	TRINITY_DN72719_c0_g2	TRINITY_DN95043_c0_g2								TRINITY_DN79132_c0_g2	TRINITY_DN73035_c0_g1
	TRINITY_DN71149_c0_g2	TRINITY_DN85946_c2_g1	TRINITY_DN92328_c2_g1								TRINITY_DN85213_c0_g1	TRINITY_DN83220_c0_g1
	TRINITY_DN90683_c0_g1	TRINITY_DN83553_c0_g1	TRINITY_DN95989_c1_g1								TRINITY_DN89398_c0_g1	TRINITY_DN75715_c0_g1
	TRINITY_DN87716_c0_g5	TRINITY_DN86213_c0_g1	TRINITY_DN77302_c1_g3								TRINITY_DN92442_c0_g2	TRINITY_DN86164_c0_g1
	TRINITY_DN85169_c0_g1	TRINITY_DN90540_c2_g1	TRINITY_DN86250_c3_g1								TRINITY_DN82963_c1_g4	TRINITY_DN83131_c1_g2
	TRINITY_DN86365_c1_g1	TRINITY_DN96470_c1_g1	TRINITY_DN97551_c0_g1								TRINITY_DN73910_c2_g1	TRINITY_DN85505_c0_g2
	TRINITY_DN83298_c1_g4	TRINITY_DN97339_c1_g2	TRINITY_DN94707_c0_g1								TRINITY_DN86778_c1_g4	TRINITY_DN93139_c0_g5
	TRINITY_DN90096_c0_g1	TRINITY_DN85971_c2_g5	TRINITY_DN95297_c2_g1								TRINITY_DN89337_c1_g1	TRINITY_DN88382_c0_g2
	TRINITY_DN97864_c1_g1	TRINITY_DN82461_c0_g1	TRINITY_DN78429_c5_g4								TRINITY_DN94851_c1_g4	TRINITY_DN72875_c0_g1
	TRINITY_DN83063_c0_g2	TRINITY_DN85871_c0_g2	TRINITY_DN71813_c1_g2								TRINITY_DN91102_c0_g1	TRINITY_DN79560_c0_g1
	TRINITY_DN72423_c3_g2	TRINITY_DN69354_c0_g3	TRINITY_DN89717_c1_g1								TRINITY_DN85961_c0_g2	TRINITY_DN95553_c0_g2
	TRINITY_DN84863_c1_g3	TRINITY_DN85913_c1_g1	TRINITY_DN98181_c1_g1								TRINITY_DN91108_c2_g4	TRINITY_DN82369_c0_g5
	TRINITY_DN70745_c1_g3	TRINITY_DN95488_c0_g1	TRINITY_DN88978_c0_g2								TRINITY_DN90620_c1_g1	TRINITY_DN85352_c0_g3
	TRINITY_DN96752_c0_g1	TRINITY_DN83197_c1_g1	TRINITY_DN98029_c4_g1								TRINITY_DN75580_c0_g1	TRINITY_DN97500_c0_g2
	TRINITY_DN82416_c0_g1	TRINITY_DN78509_c0_g1	TRINITY_DN95141_c3_g1								TRINITY_DN96523_c1_g1	TRINITY_DN98443_c1_g2
	TRINITY_DN89638_c1_g1	TRINITY_DN97509_c0_g1	TRINITY_DN73384_c1_g2								TRINITY_DN90122_c0_g1	TRINITY_DN80853_c0_g1
	TRINITY_DN73736_c2_g1	TRINITY_DN74701_c0_g1	TRINITY_DN95835_c0_g1								TRINITY_DN98595_c1_g3	TRINITY_DN76921_c0_g2
	TRINITY_DN97587_c1_g2	TRINITY_DN75745_c1_g1	TRINITY_DN96332_c0_g1								TRINITY_DN97936_c1_g1	TRINITY_DN93894_c1_g2
	TRINITY_DN78780_c1_g1	TRINITY_DN76325_c0_g5	TRINITY_DN84368_c0_g1								TRINITY_DN89209_c2_g1	TRINITY_DN96080_c3_g3
	TRINITY_DN95632_c2_g1	TRINITY_DN95243_c3_g1	TRINITY_DN85746_c1_g2								TRINITY_DN74295_c2_g1	TRINITY_DN95551_c0_g5
	TRINITY_DN98206_c1_g3	TRINITY_DN86869_c0_g1	TRINITY_DN80047_c1_g1								TRINITY_DN82801_c0_g1	TRINITY_DN89504_c0_g2
	TRINITY_DN98452_c3_g2	TRINITY_DN79763_c2_g1	TRINITY_DN75559_c1_g1								TRINITY_DN91033_c2_g2	TRINITY_DN97972_c2_g1
	TRINITY_DN83026_c1_g1	TRINITY_DN75703_c0_g1	TRINITY_DN89341_c0_g1								TRINITY_DN78795_c1_g1	TRINITY_DN70537_c1_g1
	TRINITY_DN97284_c1_g2	TRINITY_DN97318_c4_g1	TRINITY_DN78281_c0_g2								TRINITY_DN73374_c1_g2	TRINITY_DN83545_c2_g3
	TRINITY_DN87291_c2_g1	TRINITY_DN94014_c0_g3	TRINITY_DN80553_c1_g1								TRINITY_DN81128_c1_g1	TRINITY_DN69820_c0_g1
	TRINITY_DN92948_c0_g1	TRINITY_DN94912_c0_g2	TRINITY_DN75005_c1_g1								TRINITY_DN79850_c0_g6	TRINITY_DN73486_c0_g1
	TRINITY_DN90765_c1_g2	TRINITY_DN87704_c0_g2	TRINITY_DN81290_c0_g1								TRINITY_DN78611_c2_g1	TRINITY_DN73413_c0_g1
	TRINITY_DN83974_c0_g1	TRINITY_DN95148_c0_g2	TRINITY_DN83239_c1_g1								TRINITY_DN96449_c1_g3	TRINITY_DN72824_c1_g3
	TRINITY_DN92480_c0_g1	TRINITY_DN94168_c0_g1	TRINITY_DN76939_c1_g4								TRINITY_DN96062_c2_g5	TRINITY_DN90217_c0_g2
	TRINITY_DN86308_c0_g4	TRINITY_DN71241_c0_g2	TRINITY_DN87442_c0_g2								TRINITY_DN93398_c0_g1	TRINITY_DN93407_c0_g1
	TRINITY_DN97150_c1_g9	TRINITY_DN73312_c0_g1	TRINITY_DN70528_c0_g1								TRINITY_DN83600_c0_g1	TRINITY_DN80227_c0_g1
	TRINITY_DN91822_c0_g3	TRINITY_DN92020_c0_g1	TRINITY_DN71446_c0_g3								TRINITY_DN97976_c1_g3	TRINITY_DN95722_c0_g1
	TRINITY_DN74563_c1_g1	TRINITY_DN92792_c0_g2	TRINITY_DN66469_c0_g2								TRINITY_DN97736_c4_g5	TRINITY_DN79580_c1_g1
	TRINITY_DN90043_c0_g1	TRINITY_DN69454_c0_g9	TRINITY_DN79801_c4_g1								TRINITY_DN84002_c1_g1	TRINITY_DN93020_c0_g1
	TRINITY_DN74061_c0_g1	TRINITY_DN83556_c1_g1	TRINITY_DN83380_c1_g2								TRINITY_DN88632_c0_g3	TRINITY_DN92830_c0_g1
	TRINITY_DN97886_c0_g1	TRINITY_DN81822_c0_g1	TRINITY_DN96322_c1_g1								TRINITY_DN95936_c1_g5	TRINITY_DN84091_c1_g1
	TRINITY_DN86367_c0_g1	TRINITY_DN75691_c0_g1	TRINITY_DN72256_c2_g1								TRINITY_DN72666_c0_g1	TRINITY_DN95722_c0_g3
	TRINITY_DN88794_c2_g1	TRINITY_DN90724_c2_g3	TRINITY_DN78175_c2_g4								TRINITY_DN80884_c0_g1	TRINITY_DN78201_c0_g1
	TRINITY_DN98106_c5_g4	TRINITY_DN87398_c1_g2	TRINITY_DN70840_c0_g4								TRINITY_DN72688_c0_g2	TRINITY_DN86624_c1_g1
	TRINITY_DN97301_c0_g2	TRINITY_DN81012_c0_g2	TRINITY_DN86737_c0_g3								TRINITY_DN93594_c0_g1	TRINITY_DN72523_c0_g1
	TRINITY_DN93267_c0_g1	TRINITY_DN95277_c0_g1	TRINITY_DN72493_c6_g3								TRINITY_DN93732_c1_g1	TRINITY_DN93893_c0_g1
	TRINITY_DN70799_c2_g1	TRINITY_DN87818_c0_g3	TRINITY_DN91279_c0_g3								TRINITY_DN91153_c0_g2	TRINITY_DN94305_c0_g2
	TRINITY_DN94993_c1_g2	TRINITY_DN73665_c4_g1	TRINITY_DN91405_c0_g1								TRINITY_DN93239_c0_g2	TRINITY_DN97687_c2_g6
	TRINITY_DN68361_c0_g1	TRINITY_DN84168_c2_g1	TRINITY_DN81815_c0_g1								TRINITY_DN95807_c3_g1	TRINITY_DN97087_c3_g1
	TRINITY_DN80720_c0_g2	TRINITY_DN96485_c1_g1	TRINITY_DN77914_c0_g2								TRINITY_DN80965_c0_g4	TRINITY_DN82758_c0_g1
	TRINITY_DN67572_c0_g2	TRINITY_DN72612_c0_g3	TRINITY_DN82919_c2_g1								TRINITY_DN73613_c1_g2	TRINITY_DN77092_c1_g1
	TRINITY_DN91554_c0_g2	TRINITY_DN96322_c1_g2	TRINITY_DN74730_c0_g2								TRINITY_DN95123_c1_g2	TRINITY_DN90651_c0_g4
	TRINITY_DN97785_c2_g2	TRINITY_DN85672_c0_g3	TRINITY_DN73306_c2_g8								TRINITY_DN81990_c0_g1	TRINITY_DN76185_c1_g1
	TRINITY_DN88122_c2_g1	TRINITY_DN96183_c2_g2	TRINITY_DN79143_c1_g2								TRINITY_DN77981_c2_g1	TRINITY_DN89195_c1_g2
	TRINITY_DN80922_c1_g2	TRINITY_DN88078_c0_g1	TRINITY_DN81999_c1_g3								TRINITY_DN88225_c4_g1	TRINITY_DN97213_c0_g1
	TRINITY_DN85960_c0_g3	TRINITY_DN90632_c2_g2	TRINITY_DN80910_c3_g1								TRINITY_DN71306_c1_g4	TRINITY_DN97487_c0_g2
	TRINITY_DN70660_c2_g2	TRINITY_DN77702_c1_g2	TRINITY_DN96379_c3_g2								TRINITY_DN90362_c0_g1	TRINITY_DN66113_c0_g1
	TRINITY_DN97906_c3_g1	TRINITY_DN89724_c3_g1	TRINITY_DN98422_c3_g1								TRINITY_DN68792_c0_g1	TRINITY_DN74852_c1_g4
	TRINITY_DN89905_c0_g2	TRINITY_DN69705_c0_g1	TRINITY_DN74396_c0_g3								TRINITY_DN95945_c1_g2	TRINITY_DN78389_c0_g1
	TRINITY_DN69548_c0_g1	TRINITY_DN94030_c0_g1	TRINITY_DN91693_c1_g3								TRINITY_DN72905_c0_g4	TRINITY_DN95567_c0_g4
	TRINITY_DN94576_c0_g1	TRINITY_DN79691_c0_g1	TRINITY_DN85690_c1_g3								TRINITY_DN95012_c2_g2	TRINITY_DN82838_c1_g2
	TRINITY_DN74044_c0_g2	TRINITY_DN85626_c2_g1	TRINITY_DN94493_c1_g8								TRINITY_DN88959_c0_g1	TRINITY_DN91640_c0_g5
	TRINITY_DN98159_c2_g3	TRINITY_DN86263_c0_g3	TRINITY_DN80884_c1_g1								TRINITY_DN81206_c1_g1	TRINITY_DN86963_c0_g4
	TRINITY_DN80720_c0_g1	TRINITY_DN75779_c0_g2	TRINITY_DN92564_c0_g3								TRINITY_DN89087_c0_g1	TRINITY_DN94859_c0_g8
	TRINITY_DN83149_c3_g2	TRINITY_DN96652_c2_g1	TRINITY_DN93632_c0_g1								TRINITY_DN94066_c0_g1	TRINITY_DN84843_c0_g4
	TRINITY_DN81200_c1_g4	TRINITY_DN76372_c2_g2	TRINITY_DN99048_c9_g5								TRINITY_DN91427_c0_g1	TRINITY_DN74879_c0_g1
	TRINITY_DN83425_c0_g1	TRINITY_DN69085_c2_g5	TRINITY_DN76004_c1_g1								TRINITY_DN81486_c1_g4	TRINITY_DN75938_c3_g1
	TRINITY_DN73330_c1_g2	TRINITY_DN81580_c1_g1	TRINITY_DN97509_c1_g2								TRINITY_DN73444_c1_g3	TRINITY_DN84235_c0_g1
	TRINITY_DN73221_c0_g5	TRINITY_DN92487_c1_g3									TRINITY_DN71406_c1_g2	TRINITY_DN96290_c1_g1
	TRINITY_DN96473_c0_g1	TRINITY_DN80602_c4_g2									TRINITY_DN86805_c1_g1	TRINITY_DN97729_c2_g3
	TRINITY_DN78231_c0_g3	TRINITY_DN77515_c0_g2									TRINITY_DN96976_c1_g1	TRINITY_DN78964_c0_g1
	TRINITY_DN90288_c2_g1	TRINITY_DN74570_c0_g1									TRINITY_DN96734_c0_g3	TRINITY_DN89196_c0_g3
	TRINITY_DN80331_c1_g1	TRINITY_DN71758_c3_g3									TRINITY_DN86079_c0_g1	TRINITY_DN76663_c0_g3
	TRINITY_DN77043_c0_g3	TRINITY_DN82726_c0_g1									TRINITY_DN68793_c0_g1	TRINITY_DN78760_c0_g1
	TRINITY_DN74044_c0_g1	TRINITY_DN92362_c1_g1									TRINITY_DN68434_c0_g1	TRINITY_DN86970_c0_g4
	TRINITY_DN97906_c3_g3	TRINITY_DN86792_c0_g1									TRINITY_DN94985_c0_g1	TRINITY_DN73310_c0_g1
	TRINITY_DN98216_c1_g2	TRINITY_DN88705_c0_g1									TRINITY_DN64594_c0_g1	TRINITY_DN69286_c1_g1
	TRINITY_DN95905_c1_g1	TRINITY_DN83683_c0_g2									TRINITY_DN95327_c1_g1	TRINITY_DN72018_c0_g2
	TRINITY_DN95026_c0_g1	TRINITY_DN75181_c0_g2									TRINITY_DN86271_c0_g2	TRINITY_DN93476_c1_g2
	TRINITY_DN93733_c0_g1	TRINITY_DN95457_c4_g2									TRINITY_DN98131_c0_g1	TRINITY_DN94776_c0_g2
	TRINITY_DN69624_c0_g1	TRINITY_DN72456_c0_g1									TRINITY_DN87707_c0_g1	TRINITY_DN92058_c1_g1
	TRINITY_DN78095_c1_g1	TRINITY_DN96097_c3_g5									TRINITY_DN66966_c1_g2	TRINITY_DN86457_c0_g1
	TRINITY_DN77178_c0_g1	TRINITY_DN79025_c0_g2									TRINITY_DN92402_c0_g1	TRINITY_DN80741_c6_g3
	TRINITY_DN97575_c2_g2	TRINITY_DN81783_c0_g1									TRINITY_DN85907_c1_g1	TRINITY_DN88103_c1_g3
	TRINITY_DN93005_c1_g2	TRINITY_DN81664_c0_g1									TRINITY_DN98683_c5_g1	TRINITY_DN92625_c0_g4
	TRINITY_DN91282_c3_g3	TRINITY_DN89157_c0_g2									TRINITY_DN76415_c1_g1	TRINITY_DN69751_c0_g2
	TRINITY_DN95258_c1_g3	TRINITY_DN70115_c0_g1									TRINITY_DN86288_c0_g1	TRINITY_DN93571_c2_g4
	TRINITY_DN85880_c1_g1	TRINITY_DN90079_c2_g1									TRINITY_DN67158_c0_g1	TRINITY_DN83345_c1_g1
	TRINITY_DN71216_c0_g2	TRINITY_DN91307_c0_g2									TRINITY_DN95084_c0_g1	TRINITY_DN97418_c2_g2
	TRINITY_DN98728_c6_g3	TRINITY_DN82190_c1_g2									TRINITY_DN91980_c3_g1	TRINITY_DN96820_c2_g2
	TRINITY_DN89046_c1_g3	TRINITY_DN91786_c1_g1									TRINITY_DN96790_c1_g1
	TRINITY_DN94210_c0_g3	TRINITY_DN98810_c1_g7									TRINITY_DN98726_c1_g2
	TRINITY_DN84843_c0_g2	TRINITY_DN97050_c1_g5									TRINITY_DN90155_c0_g1
	TRINITY_DN69035_c2_g6	TRINITY_DN87047_c1_g6									TRINITY_DN82528_c0_g1
	TRINITY_DN92625_c0_g5	TRINITY_DN89885_c0_g1									TRINITY_DN87944_c0_g3
	TRINITY_DN72620_c0_g2	TRINITY_DN77067_c1_g1									TRINITY_DN98710_c0_g3
	TRINITY_DN83959_c1_g1	TRINITY_DN95691_c1_g2									TRINITY_DN68532_c1_g1
	TRINITY_DN89599_c1_g1	TRINITY_DN90998_c1_g2									TRINITY_DN83638_c0_g1
	TRINITY_DN72530_c1_g2	TRINITY_DN87003_c1_g2									TRINITY_DN87600_c1_g3
	TRINITY_DN85465_c0_g2	TRINITY_DN86488_c0_g4									TRINITY_DN91651_c2_g1
	TRINITY_DN67138_c0_g1	TRINITY_DN93750_c0_g1									TRINITY_DN69892_c1_g1
	TRINITY_DN76774_c1_g1	TRINITY_DN96061_c0_g1									TRINITY_DN85885_c3_g1
	TRINITY_DN95776_c1_g2	TRINITY_DN69677_c0_g1									TRINITY_DN71192_c0_g1
	TRINITY_DN81632_c0_g3	TRINITY_DN86782_c1_g2									TRINITY_DN84848_c4_g1
	TRINITY_DN77623_c2_g1	TRINITY_DN76652_c0_g4									TRINITY_DN95682_c1_g4
	TRINITY_DN92486_c0_g3	TRINITY_DN81349_c1_g2									TRINITY_DN98435_c1_g4
	TRINITY_DN81861_c4_g3	TRINITY_DN84936_c1_g2									TRINITY_DN95467_c0_g2
	TRINITY_DN79183_c0_g2	TRINITY_DN86299_c1_g1									TRINITY_DN70723_c1_g1
	TRINITY_DN89483_c1_g1	TRINITY_DN93691_c0_g2									TRINITY_DN76998_c2_g1
	TRINITY_DN93112_c2_g2	TRINITY_DN76539_c1_g2									TRINITY_DN94767_c1_g3
	TRINITY_DN79880_c1_g2	TRINITY_DN98311_c1_g1									TRINITY_DN67271_c0_g1
	TRINITY_DN88067_c0_g1	TRINITY_DN80928_c1_g2									TRINITY_DN95428_c1_g1
	TRINITY_DN90429_c1_g1	TRINITY_DN93480_c1_g1									TRINITY_DN95530_c0_g1
	TRINITY_DN86536_c2_g5	TRINITY_DN79063_c0_g1									TRINITY_DN81921_c0_g1
	TRINITY_DN74936_c0_g3	TRINITY_DN96231_c1_g3									TRINITY_DN94402_c1_g1
	TRINITY_DN97225_c1_g3	TRINITY_DN94543_c1_g3									TRINITY_DN98905_c0_g2
	TRINITY_DN76936_c1_g3	TRINITY_DN98347_c2_g1									TRINITY_DN87542_c0_g3
	TRINITY_DN98750_c2_g4	TRINITY_DN67282_c0_g1									TRINITY_DN96369_c2_g3
	TRINITY_DN90039_c0_g1	TRINITY_DN93159_c0_g1									TRINITY_DN95710_c3_g2
	TRINITY_DN92012_c1_g1	TRINITY_DN88314_c1_g1									TRINITY_DN88277_c0_g1
	TRINITY_DN79976_c0_g1	TRINITY_DN83558_c0_g3									TRINITY_DN97414_c0_g1
	TRINITY_DN76782_c0_g1	TRINITY_DN75994_c0_g3									TRINITY_DN70805_c2_g3
	TRINITY_DN69835_c0_g1	TRINITY_DN97542_c2_g2									TRINITY_DN98899_c0_g1
	TRINITY_DN88300_c0_g1	TRINITY_DN66883_c0_g1									TRINITY_DN73213_c1_g4
	TRINITY_DN79598_c0_g2	TRINITY_DN81047_c3_g1									TRINITY_DN98770_c4_g2
	TRINITY_DN76476_c0_g3	TRINITY_DN79005_c0_g1									TRINITY_DN83048_c1_g1
	TRINITY_DN89699_c3_g1	TRINITY_DN71299_c0_g1									TRINITY_DN78801_c1_g1
	TRINITY_DN83924_c0_g1	TRINITY_DN97447_c1_g3									TRINITY_DN92158_c0_g4
	TRINITY_DN80110_c0_g1	TRINITY_DN89680_c0_g1									TRINITY_DN99016_c7_g5
	TRINITY_DN73150_c1_g4	TRINITY_DN76852_c1_g3									TRINITY_DN94999_c0_g1
	TRINITY_DN85861_c2_g2	TRINITY_DN81242_c1_g3									TRINITY_DN73238_c0_g2
	TRINITY_DN81404_c0_g1	TRINITY_DN97557_c0_g1									TRINITY_DN65824_c0_g1
	TRINITY_DN82279_c0_g3	TRINITY_DN91987_c1_g4									TRINITY_DN88453_c1_g1
	TRINITY_DN84473_c4_g1	TRINITY_DN96308_c1_g1									TRINITY_DN70885_c1_g1
	TRINITY_DN85872_c0_g3	TRINITY_DN86162_c0_g2									TRINITY_DN71970_c0_g1
	TRINITY_DN96115_c0_g1	TRINITY_DN89158_c0_g1									TRINITY_DN82435_c2_g4
	TRINITY_DN85526_c0_g4	TRINITY_DN81522_c2_g3									TRINITY_DN74812_c0_g2
	TRINITY_DN69537_c0_g1	TRINITY_DN82130_c0_g1									TRINITY_DN72866_c0_g3
	TRINITY_DN89453_c0_g1	TRINITY_DN87740_c2_g1									TRINITY_DN96600_c2_g2
	TRINITY_DN74130_c1_g2	TRINITY_DN79664_c0_g2									TRINITY_DN90470_c0_g4
	TRINITY_DN97067_c3_g1	TRINITY_DN73100_c0_g3									TRINITY_DN98833_c9_g1
	TRINITY_DN73410_c3_g3	TRINITY_DN69476_c0_g1									TRINITY_DN85750_c2_g1
	TRINITY_DN75319_c2_g1	TRINITY_DN74997_c0_g1									TRINITY_DN75231_c0_g1
	TRINITY_DN79834_c1_g2	TRINITY_DN84137_c0_g1									TRINITY_DN94037_c1_g2
	TRINITY_DN89860_c0_g2	TRINITY_DN81565_c1_g2									TRINITY_DN97709_c0_g1
	TRINITY_DN98156_c2_g2	TRINITY_DN88335_c1_g1									TRINITY_DN91503_c0_g3
	TRINITY_DN97719_c1_g1	TRINITY_DN96567_c0_g2									TRINITY_DN87533_c3_g4
	TRINITY_DN89638_c1_g4	TRINITY_DN72285_c1_g2									TRINITY_DN95067_c0_g2
	TRINITY_DN78523_c2_g1	TRINITY_DN92092_c0_g1									TRINITY_DN98395_c1_g2
	TRINITY_DN92945_c2_g2	TRINITY_DN72166_c0_g2									TRINITY_DN98259_c2_g3
	TRINITY_DN73922_c0_g3	TRINITY_DN82223_c0_g3									TRINITY_DN88914_c0_g1
	TRINITY_DN96763_c2_g4	TRINITY_DN76669_c3_g1									TRINITY_DN91936_c0_g6
	TRINITY_DN97950_c3_g1	TRINITY_DN69915_c0_g1									TRINITY_DN71855_c4_g2
	TRINITY_DN81157_c0_g4	TRINITY_DN92229_c2_g2									TRINITY_DN87084_c1_g4
	TRINITY_DN89718_c0_g1	TRINITY_DN72896_c1_g1									TRINITY_DN96831_c1_g2
	TRINITY_DN74290_c0_g1	TRINITY_DN84770_c0_g1									TRINITY_DN63286_c0_g1
	TRINITY_DN89399_c0_g1	TRINITY_DN77701_c0_g1									TRINITY_DN97085_c1_g5
	TRINITY_DN88593_c0_g1	TRINITY_DN76934_c0_g1									TRINITY_DN98550_c2_g1
	TRINITY_DN96883_c1_g4	TRINITY_DN98308_c1_g1									TRINITY_DN94542_c0_g6
	TRINITY_DN74898_c0_g1	TRINITY_DN72378_c1_g2									TRINITY_DN86240_c0_g1
	TRINITY_DN92072_c1_g1	TRINITY_DN96771_c1_g1									TRINITY_DN93974_c1_g1
	TRINITY_DN81290_c0_g7	TRINITY_DN94549_c0_g1									TRINITY_DN83303_c2_g2
	TRINITY_DN68107_c0_g1	TRINITY_DN94362_c0_g3									TRINITY_DN85009_c0_g2
	TRINITY_DN69549_c0_g1	TRINITY_DN86584_c0_g1									TRINITY_DN95428_c0_g1
	TRINITY_DN82454_c2_g1	TRINITY_DN93439_c0_g2									TRINITY_DN95651_c1_g2
	TRINITY_DN95258_c1_g2	TRINITY_DN89316_c1_g1									TRINITY_DN98504_c3_g1
	TRINITY_DN88321_c1_g1	TRINITY_DN92862_c0_g1									TRINITY_DN95221_c2_g3
	TRINITY_DN69924_c1_g1	TRINITY_DN81482_c0_g3									TRINITY_DN94365_c2_g2
	TRINITY_DN98636_c1_g1	TRINITY_DN87437_c1_g1									TRINITY_DN93254_c0_g1
	TRINITY_DN78158_c0_g1	TRINITY_DN77764_c0_g1									TRINITY_DN97471_c1_g1
	TRINITY_DN81201_c2_g1	TRINITY_DN97251_c1_g5									TRINITY_DN71143_c0_g1
	TRINITY_DN93856_c0_g2	TRINITY_DN68143_c0_g1									TRINITY_DN95490_c0_g2
	TRINITY_DN67454_c0_g1	TRINITY_DN79492_c0_g1									TRINITY_DN90251_c1_g2
	TRINITY_DN88730_c0_g5	TRINITY_DN97741_c3_g1									TRINITY_DN97601_c2_g4
	TRINITY_DN94404_c2_g1	TRINITY_DN72616_c0_g3									TRINITY_DN92690_c1_g1
	TRINITY_DN77873_c1_g2	TRINITY_DN80708_c0_g2									TRINITY_DN81692_c0_g1
	TRINITY_DN95855_c2_g1	TRINITY_DN97288_c0_g1									TRINITY_DN83332_c0_g2
	TRINITY_DN75982_c1_g1	TRINITY_DN91971_c3_g1									TRINITY_DN94895_c1_g1
	TRINITY_DN84558_c0_g1	TRINITY_DN92594_c2_g2									TRINITY_DN96650_c2_g2
	TRINITY_DN90425_c0_g1	TRINITY_DN84009_c1_g1									TRINITY_DN96351_c1_g2
	TRINITY_DN94650_c0_g2	TRINITY_DN97132_c2_g2									TRINITY_DN86326_c0_g2
	TRINITY_DN82882_c0_g3	TRINITY_DN76689_c1_g1									TRINITY_DN94948_c1_g7
	TRINITY_DN66938_c0_g1	TRINITY_DN94990_c1_g3									TRINITY_DN97074_c3_g2
	TRINITY_DN74667_c2_g1	TRINITY_DN83150_c0_g1									TRINITY_DN76911_c0_g4
	TRINITY_DN81873_c0_g1	TRINITY_DN72193_c1_g1									TRINITY_DN71558_c1_g1
	TRINITY_DN69899_c1_g1	TRINITY_DN89510_c1_g1									TRINITY_DN84002_c1_g2
	TRINITY_DN97815_c0_g6	TRINITY_DN95157_c1_g2									TRINITY_DN94649_c0_g3
	TRINITY_DN93165_c0_g3	TRINITY_DN98018_c4_g1									TRINITY_DN94454_c1_g3
	TRINITY_DN85352_c0_g1	TRINITY_DN91906_c1_g1									TRINITY_DN70831_c1_g2
	TRINITY_DN98410_c1_g1	TRINITY_DN88817_c1_g3									TRINITY_DN89634_c0_g3
	TRINITY_DN67975_c1_g1	TRINITY_DN93504_c1_g1									TRINITY_DN80310_c1_g3
	TRINITY_DN77500_c1_g2	TRINITY_DN97183_c1_g2									TRINITY_DN94836_c1_g4
	TRINITY_DN75984_c2_g1	TRINITY_DN67873_c2_g1									TRINITY_DN89072_c1_g3
	TRINITY_DN91696_c1_g1	TRINITY_DN82249_c1_g1									TRINITY_DN94004_c1_g2
	TRINITY_DN97260_c0_g2	TRINITY_DN89938_c0_g3									TRINITY_DN91703_c2_g2
	TRINITY_DN87318_c2_g1	TRINITY_DN90065_c2_g1									TRINITY_DN79570_c1_g1
	TRINITY_DN90801_c0_g1	TRINITY_DN90526_c1_g1									TRINITY_DN97556_c2_g1
	TRINITY_DN96569_c0_g2	TRINITY_DN86681_c1_g1									TRINITY_DN68647_c0_g1
	TRINITY_DN98838_c5_g1	TRINITY_DN71531_c2_g1									TRINITY_DN96753_c1_g2
	TRINITY_DN71238_c1_g1	TRINITY_DN74789_c0_g2									TRINITY_DN75376_c0_g1
	TRINITY_DN87633_c0_g1	TRINITY_DN96443_c1_g1									TRINITY_DN96671_c1_g1
	TRINITY_DN77513_c0_g3	TRINITY_DN83948_c0_g1									TRINITY_DN74512_c3_g1
	TRINITY_DN97349_c1_g2	TRINITY_DN92095_c0_g2									TRINITY_DN87659_c2_g2
	TRINITY_DN67792_c0_g1	TRINITY_DN76011_c1_g1									TRINITY_DN97461_c0_g1
	TRINITY_DN85947_c1_g1	TRINITY_DN94937_c0_g1									TRINITY_DN87114_c0_g3
	TRINITY_DN81455_c0_g1	TRINITY_DN75101_c3_g2									TRINITY_DN91784_c1_g1
	TRINITY_DN79467_c0_g3	TRINITY_DN83129_c1_g2									TRINITY_DN80065_c0_g3
	TRINITY_DN83666_c1_g3	TRINITY_DN78679_c0_g1									TRINITY_DN95511_c3_g4
	TRINITY_DN88853_c0_g1	TRINITY_DN74152_c3_g1									TRINITY_DN95345_c0_g1
	TRINITY_DN94141_c0_g2	TRINITY_DN78986_c0_g1									TRINITY_DN92092_c1_g1
	TRINITY_DN88143_c4_g1	TRINITY_DN86664_c0_g1									TRINITY_DN74234_c0_g4
	TRINITY_DN97670_c1_g1	TRINITY_DN82111_c0_g1									TRINITY_DN74096_c1_g1
	TRINITY_DN91741_c3_g8	TRINITY_DN97843_c1_g1									TRINITY_DN78505_c2_g1
	TRINITY_DN69017_c3_g1	TRINITY_DN85724_c4_g1									TRINITY_DN88508_c2_g1
	TRINITY_DN95424_c0_g1	TRINITY_DN80777_c0_g1									TRINITY_DN97817_c3_g2
	TRINITY_DN80039_c0_g5	TRINITY_DN85295_c0_g1									TRINITY_DN97565_c2_g1
	TRINITY_DN74653_c2_g1	TRINITY_DN89854_c1_g1									TRINITY_DN98048_c2_g2
	TRINITY_DN92419_c1_g1	TRINITY_DN86839_c0_g1									TRINITY_DN94151_c1_g1
	TRINITY_DN88777_c0_g1	TRINITY_DN89041_c1_g2									TRINITY_DN72745_c1_g1
	TRINITY_DN91640_c0_g2	TRINITY_DN95840_c1_g3									TRINITY_DN73836_c1_g1
	TRINITY_DN70157_c1_g3	TRINITY_DN76022_c0_g1									TRINITY_DN72819_c0_g1
	TRINITY_DN83307_c1_g3	TRINITY_DN94466_c0_g1									TRINITY_DN97637_c1_g1
	TRINITY_DN96479_c3_g2	TRINITY_DN98771_c3_g1									TRINITY_DN82931_c0_g4
	TRINITY_DN85827_c0_g2	TRINITY_DN91965_c1_g2									TRINITY_DN82502_c0_g1
	TRINITY_DN92200_c0_g1	TRINITY_DN94355_c0_g1									TRINITY_DN91353_c0_g1
	TRINITY_DN88460_c1_g1	TRINITY_DN80642_c0_g3									TRINITY_DN75411_c0_g3
	TRINITY_DN82621_c1_g4	TRINITY_DN87458_c1_g1									TRINITY_DN98262_c0_g1
	TRINITY_DN95901_c1_g3	TRINITY_DN89050_c0_g3									TRINITY_DN87416_c0_g5
	TRINITY_DN97985_c2_g2	TRINITY_DN82188_c0_g3									TRINITY_DN81660_c3_g2
	TRINITY_DN97258_c2_g1	TRINITY_DN93378_c1_g1									TRINITY_DN90685_c2_g1
	TRINITY_DN97538_c0_g1	TRINITY_DN81190_c0_g1									TRINITY_DN98203_c2_g1
	TRINITY_DN78842_c0_g2	TRINITY_DN80774_c0_g1									TRINITY_DN89448_c0_g3
	TRINITY_DN95701_c0_g2	TRINITY_DN71283_c1_g4									TRINITY_DN93693_c0_g1
	TRINITY_DN85078_c3_g1	TRINITY_DN88461_c0_g1									TRINITY_DN82775_c4_g1
	TRINITY_DN89558_c2_g1	TRINITY_DN76602_c0_g2									TRINITY_DN73173_c0_g2
	TRINITY_DN95105_c1_g1	TRINITY_DN96441_c1_g2									TRINITY_DN95894_c1_g2
	TRINITY_DN86700_c0_g1	TRINITY_DN68076_c1_g1									TRINITY_DN96325_c1_g5
	TRINITY_DN73205_c0_g1	TRINITY_DN86563_c0_g1									TRINITY_DN75649_c0_g1
	TRINITY_DN96975_c1_g1	TRINITY_DN73833_c0_g1									TRINITY_DN79655_c1_g1
	TRINITY_DN74015_c0_g4	TRINITY_DN75702_c0_g1									TRINITY_DN75665_c0_g1
	TRINITY_DN80918_c1_g1	TRINITY_DN96307_c2_g1									TRINITY_DN98582_c6_g5
	TRINITY_DN72185_c0_g1	TRINITY_DN98404_c2_g1									TRINITY_DN94424_c0_g3
	TRINITY_DN93605_c0_g1	TRINITY_DN91384_c2_g1									TRINITY_DN97352_c0_g3
	TRINITY_DN78268_c3_g1	TRINITY_DN77765_c0_g3									TRINITY_DN92771_c0_g1
	TRINITY_DN91054_c0_g4	TRINITY_DN88823_c0_g1									TRINITY_DN89327_c0_g1
	TRINITY_DN94945_c1_g1	TRINITY_DN84972_c0_g4									TRINITY_DN74320_c0_g1
	TRINITY_DN84722_c2_g1	TRINITY_DN89689_c0_g2									TRINITY_DN97232_c2_g1
	TRINITY_DN78577_c2_g1	TRINITY_DN83623_c0_g2									TRINITY_DN90185_c1_g1
	TRINITY_DN84353_c0_g4	TRINITY_DN83614_c0_g1									TRINITY_DN78805_c1_g1
	TRINITY_DN85360_c1_g2	TRINITY_DN95773_c0_g1									TRINITY_DN89839_c0_g3
	TRINITY_DN98689_c7_g2	TRINITY_DN88247_c0_g2									TRINITY_DN88083_c0_g1
	TRINITY_DN88094_c0_g2	TRINITY_DN77753_c0_g1									TRINITY_DN83706_c0_g2
	TRINITY_DN82891_c1_g1	TRINITY_DN76713_c1_g4									TRINITY_DN72442_c2_g3
	TRINITY_DN94713_c0_g1	TRINITY_DN94477_c1_g1									TRINITY_DN94806_c1_g1
	TRINITY_DN91709_c0_g3	TRINITY_DN94691_c0_g1									TRINITY_DN75496_c1_g1
	TRINITY_DN88736_c0_g1	TRINITY_DN93088_c2_g1									TRINITY_DN77099_c0_g1
	TRINITY_DN70762_c2_g1	TRINITY_DN80769_c1_g1									TRINITY_DN81232_c0_g1
	TRINITY_DN84029_c0_g2	TRINITY_DN97877_c2_g1									TRINITY_DN80781_c0_g5
	TRINITY_DN85077_c1_g1	TRINITY_DN80096_c1_g2									TRINITY_DN96030_c0_g1
	TRINITY_DN71598_c1_g1	TRINITY_DN78892_c0_g1									TRINITY_DN97041_c1_g2
	TRINITY_DN98138_c1_g2	TRINITY_DN87183_c0_g1									TRINITY_DN86623_c0_g1
	TRINITY_DN78790_c2_g1	TRINITY_DN80649_c0_g1									TRINITY_DN82965_c1_g1
	TRINITY_DN85048_c0_g1	TRINITY_DN90724_c2_g1									TRINITY_DN88249_c2_g1
	TRINITY_DN94112_c1_g2	TRINITY_DN72327_c1_g2									TRINITY_DN96314_c1_g1
	TRINITY_DN97931_c2_g1	TRINITY_DN75746_c1_g1									TRINITY_DN73440_c0_g1
	TRINITY_DN82791_c0_g6	TRINITY_DN85783_c0_g1									TRINITY_DN96624_c0_g1
	TRINITY_DN72420_c0_g1	TRINITY_DN79945_c0_g3									TRINITY_DN89877_c0_g1
	TRINITY_DN98830_c3_g1	TRINITY_DN85228_c0_g3									TRINITY_DN97759_c1_g2
	TRINITY_DN77458_c2_g1	TRINITY_DN87173_c0_g1									TRINITY_DN85202_c1_g4
	TRINITY_DN94150_c2_g1	TRINITY_DN76562_c0_g1									TRINITY_DN77829_c0_g1
	TRINITY_DN96448_c1_g4	TRINITY_DN93590_c0_g5									TRINITY_DN78689_c0_g1
	TRINITY_DN75122_c0_g1	TRINITY_DN92796_c1_g3									TRINITY_DN81357_c0_g2
	TRINITY_DN85626_c3_g1	TRINITY_DN97460_c1_g2									TRINITY_DN76380_c0_g1
	TRINITY_DN98680_c2_g3	TRINITY_DN92720_c2_g2									TRINITY_DN82314_c1_g2
	TRINITY_DN68779_c0_g1	TRINITY_DN72801_c0_g1									TRINITY_DN94892_c0_g1
	TRINITY_DN87576_c0_g5	TRINITY_DN84585_c1_g1									TRINITY_DN81440_c1_g1
	TRINITY_DN90826_c0_g2	TRINITY_DN93900_c2_g2									TRINITY_DN71042_c0_g1
	TRINITY_DN94359_c3_g2	TRINITY_DN84100_c0_g1									TRINITY_DN90979_c2_g1
	TRINITY_DN93029_c1_g2	TRINITY_DN95529_c2_g1									TRINITY_DN86750_c0_g3
	TRINITY_DN87435_c0_g1	TRINITY_DN68719_c0_g1									TRINITY_DN95813_c1_g1
	TRINITY_DN96736_c0_g3	TRINITY_DN80873_c1_g2									TRINITY_DN92816_c0_g1
	TRINITY_DN75214_c0_g4	TRINITY_DN79199_c0_g1									TRINITY_DN87622_c1_g4
	TRINITY_DN97576_c0_g1	TRINITY_DN75673_c0_g3									TRINITY_DN80004_c0_g1
	TRINITY_DN89137_c0_g2	TRINITY_DN67605_c1_g4									TRINITY_DN98494_c4_g1
	TRINITY_DN82791_c0_g4	TRINITY_DN98034_c6_g1									TRINITY_DN93037_c0_g2
	TRINITY_DN98264_c0_g1	TRINITY_DN90606_c1_g1									TRINITY_DN97143_c3_g3
	TRINITY_DN90425_c0_g2	TRINITY_DN89988_c0_g1									TRINITY_DN69571_c1_g1
	TRINITY_DN90341_c0_g2	TRINITY_DN85687_c0_g1									TRINITY_DN77629_c0_g1
	TRINITY_DN88480_c1_g1	TRINITY_DN73575_c4_g1									TRINITY_DN82761_c1_g1
	TRINITY_DN73053_c1_g2	TRINITY_DN73250_c0_g2									TRINITY_DN84532_c0_g1
	TRINITY_DN85827_c0_g1	TRINITY_DN76971_c1_g3									TRINITY_DN97663_c1_g3
	TRINITY_DN89876_c1_g5	TRINITY_DN91383_c1_g1									TRINITY_DN73130_c0_g1
	TRINITY_DN87359_c0_g1	TRINITY_DN85314_c2_g4									TRINITY_DN95494_c1_g1
	TRINITY_DN90875_c3_g1	TRINITY_DN73115_c2_g4									TRINITY_DN94847_c1_g2
	TRINITY_DN71061_c2_g1	TRINITY_DN82409_c0_g1									TRINITY_DN84335_c0_g1
	TRINITY_DN91076_c0_g3	TRINITY_DN92507_c0_g1									TRINITY_DN97461_c0_g2
	TRINITY_DN85222_c1_g1	TRINITY_DN96408_c5_g1									TRINITY_DN94645_c1_g1
	TRINITY_DN96221_c0_g2	TRINITY_DN76039_c0_g1									TRINITY_DN79594_c1_g2
	TRINITY_DN97146_c0_g1	TRINITY_DN78997_c1_g2									TRINITY_DN90788_c0_g2
	TRINITY_DN80244_c0_g4	TRINITY_DN76039_c0_g5									TRINITY_DN94476_c1_g1
	TRINITY_DN96169_c1_g1	TRINITY_DN72860_c0_g1									TRINITY_DN71005_c0_g6
	TRINITY_DN83303_c2_g1	TRINITY_DN68808_c1_g2									TRINITY_DN71071_c0_g3
	TRINITY_DN94010_c1_g2	TRINITY_DN77662_c0_g2									TRINITY_DN79834_c0_g1
	TRINITY_DN80135_c1_g2	TRINITY_DN85452_c0_g1									TRINITY_DN96922_c1_g4
	TRINITY_DN92325_c1_g2	TRINITY_DN73453_c1_g2									TRINITY_DN86371_c0_g2
	TRINITY_DN95020_c1_g2	TRINITY_DN70461_c0_g5									TRINITY_DN87952_c0_g1
	TRINITY_DN81452_c1_g1	TRINITY_DN83685_c0_g1									TRINITY_DN81704_c0_g1
	TRINITY_DN87747_c0_g2	TRINITY_DN97338_c1_g1									TRINITY_DN86054_c2_g1
	TRINITY_DN97404_c0_g2	TRINITY_DN87935_c0_g1									TRINITY_DN95095_c0_g2
	TRINITY_DN76556_c1_g2	TRINITY_DN88581_c0_g2									TRINITY_DN92280_c5_g1
	TRINITY_DN73745_c0_g2	TRINITY_DN92112_c2_g4									TRINITY_DN96045_c0_g1
	TRINITY_DN68639_c0_g1	TRINITY_DN94026_c1_g2									TRINITY_DN98020_c0_g1
	TRINITY_DN92657_c4_g1	TRINITY_DN96046_c2_g1									TRINITY_DN98602_c0_g1
	TRINITY_DN88442_c0_g1	TRINITY_DN79830_c1_g1									TRINITY_DN93997_c0_g2
	TRINITY_DN93423_c1_g1	TRINITY_DN97450_c0_g2									TRINITY_DN83047_c1_g1
	TRINITY_DN69860_c0_g3	TRINITY_DN98837_c0_g1									TRINITY_DN90036_c1_g2
	TRINITY_DN98271_c1_g1	TRINITY_DN68578_c1_g1									TRINITY_DN88395_c3_g2
	TRINITY_DN94365_c1_g1										TRINITY_DN95617_c1_g4
	TRINITY_DN98530_c3_g1										TRINITY_DN73220_c0_g2
	TRINITY_DN69017_c3_g7										TRINITY_DN96006_c2_g4
	TRINITY_DN91497_c0_g1										TRINITY_DN98591_c5_g2
	TRINITY_DN88775_c1_g2										TRINITY_DN98776_c3_g3
	TRINITY_DN89577_c0_g2										TRINITY_DN91644_c0_g1
	TRINITY_DN73548_c1_g2										TRINITY_DN98336_c4_g1
	TRINITY_DN88730_c0_g3										TRINITY_DN94799_c1_g1
	TRINITY_DN96204_c0_g1										TRINITY_DN70929_c2_g1
	TRINITY_DN80074_c0_g2										TRINITY_DN89410_c0_g2
	TRINITY_DN98956_c0_g2										TRINITY_DN71060_c0_g3
	TRINITY_DN94361_c1_g1										TRINITY_DN79472_c0_g2
	TRINITY_DN87778_c0_g1										TRINITY_DN98459_c1_g1
	TRINITY_DN76292_c0_g1										TRINITY_DN87601_c0_g1
	TRINITY_DN90636_c1_g5										TRINITY_DN84626_c0_g1
	TRINITY_DN98973_c1_g1										TRINITY_DN70487_c0_g1
	TRINITY_DN87473_c0_g2										TRINITY_DN73575_c3_g3
	TRINITY_DN98861_c0_g1										TRINITY_DN89096_c1_g3
	TRINITY_DN73786_c0_g2										TRINITY_DN81259_c0_g1
	TRINITY_DN95255_c1_g1										TRINITY_DN89414_c1_g1
	TRINITY_DN75566_c1_g3										TRINITY_DN81644_c0_g1
	TRINITY_DN85962_c1_g5										TRINITY_DN84678_c0_g1
	TRINITY_DN94938_c2_g5										TRINITY_DN96935_c2_g2
	TRINITY_DN82718_c1_g1										TRINITY_DN70805_c2_g2
	TRINITY_DN98464_c3_g1										TRINITY_DN97304_c1_g2
	TRINITY_DN96572_c0_g2										TRINITY_DN89264_c0_g1
	TRINITY_DN93516_c1_g3										TRINITY_DN96216_c0_g1
	TRINITY_DN88103_c1_g1										TRINITY_DN94761_c1_g2
	TRINITY_DN97919_c2_g1										TRINITY_DN74684_c0_g2
	TRINITY_DN97892_c1_g2										TRINITY_DN86425_c1_g1
	TRINITY_DN81157_c0_g1										TRINITY_DN74418_c1_g1
	TRINITY_DN94676_c0_g3										TRINITY_DN91686_c0_g1
	TRINITY_DN93972_c0_g1										TRINITY_DN77126_c1_g2
	TRINITY_DN92406_c0_g1										TRINITY_DN93381_c0_g3
	TRINITY_DN80197_c0_g1										TRINITY_DN76611_c0_g2
	TRINITY_DN69017_c3_g3										TRINITY_DN95637_c3_g4
	TRINITY_DN79389_c0_g1										TRINITY_DN73944_c3_g3
	TRINITY_DN91076_c0_g1										TRINITY_DN83505_c3_g2
	TRINITY_DN88992_c1_g1										TRINITY_DN89214_c0_g1
	TRINITY_DN71485_c3_g1										TRINITY_DN73104_c3_g1
	TRINITY_DN98884_c2_g1										TRINITY_DN97445_c4_g1
	TRINITY_DN75877_c0_g2										TRINITY_DN85343_c1_g1
	TRINITY_DN70342_c1_g1										TRINITY_DN87881_c0_g2
	TRINITY_DN77092_c1_g8										TRINITY_DN90377_c0_g2
	TRINITY_DN94029_c0_g1										TRINITY_DN80750_c0_g3
	TRINITY_DN71128_c1_g3										TRINITY_DN84175_c3_g2
	TRINITY_DN71043_c0_g1										TRINITY_DN92690_c0_g2
	TRINITY_DN77010_c1_g3										TRINITY_DN97866_c0_g4
	TRINITY_DN94393_c2_g3										TRINITY_DN91297_c0_g1
	TRINITY_DN97376_c1_g2										TRINITY_DN97777_c2_g2
	TRINITY_DN83945_c0_g2										TRINITY_DN69266_c1_g1
	TRINITY_DN89309_c0_g3										TRINITY_DN96128_c1_g5
	TRINITY_DN99047_c19_g1										TRINITY_DN92140_c0_g6
	TRINITY_DN75757_c0_g1										TRINITY_DN79887_c1_g1
	TRINITY_DN85872_c0_g1										TRINITY_DN86077_c1_g6
	TRINITY_DN94873_c1_g1										TRINITY_DN96430_c1_g1
	TRINITY_DN66366_c0_g1										TRINITY_DN93484_c0_g1
	TRINITY_DN97367_c1_g1										TRINITY_DN79340_c0_g3
	TRINITY_DN95896_c0_g1										TRINITY_DN76787_c0_g1
	TRINITY_DN85187_c0_g2										TRINITY_DN96097_c3_g2
	TRINITY_DN80322_c1_g2										TRINITY_DN81385_c1_g2
	TRINITY_DN86144_c0_g3										TRINITY_DN86087_c3_g5
	TRINITY_DN73834_c0_g1										TRINITY_DN89157_c0_g1
	TRINITY_DN91928_c1_g1										TRINITY_DN69399_c0_g2
	TRINITY_DN97469_c2_g2										TRINITY_DN86609_c1_g1
	TRINITY_DN98884_c0_g2										TRINITY_DN93940_c0_g3
	TRINITY_DN93056_c1_g2										TRINITY_DN74691_c0_g3
	TRINITY_DN84685_c0_g2										TRINITY_DN98561_c3_g2
	TRINITY_DN85781_c0_g1										TRINITY_DN73363_c2_g1
	TRINITY_DN76870_c2_g3										TRINITY_DN98582_c6_g3
	TRINITY_DN69354_c0_g1										TRINITY_DN95014_c1_g3
	TRINITY_DN78282_c1_g1										TRINITY_DN70584_c0_g4
	TRINITY_DN69507_c1_g1										TRINITY_DN73493_c1_g1
	TRINITY_DN88094_c0_g1										TRINITY_DN76476_c0_g2
	TRINITY_DN75515_c0_g4										TRINITY_DN90493_c3_g1
	TRINITY_DN98753_c5_g1										TRINITY_DN88747_c0_g1
	TRINITY_DN96221_c0_g1										TRINITY_DN93259_c1_g1
	TRINITY_DN83827_c3_g1										TRINITY_DN73654_c0_g1
	TRINITY_DN92200_c1_g1										TRINITY_DN90653_c0_g2
	TRINITY_DN97141_c3_g2										TRINITY_DN85704_c1_g3
	TRINITY_DN93343_c0_g1										TRINITY_DN96775_c3_g1
	TRINITY_DN97257_c1_g1										TRINITY_DN73605_c0_g1
	TRINITY_DN70656_c2_g1										TRINITY_DN89102_c1_g1
	TRINITY_DN91240_c0_g4										TRINITY_DN85119_c3_g1
	TRINITY_DN78482_c0_g1										TRINITY_DN74815_c2_g1
	TRINITY_DN76241_c0_g3										TRINITY_DN92410_c0_g3
	TRINITY_DN82416_c0_g5										TRINITY_DN82170_c1_g1
	TRINITY_DN93915_c1_g1										TRINITY_DN81128_c3_g1
	TRINITY_DN74829_c0_g1										TRINITY_DN91840_c1_g1
	TRINITY_DN85589_c0_g1										TRINITY_DN86405_c1_g1
	TRINITY_DN94964_c1_g1										TRINITY_DN97555_c1_g2
	TRINITY_DN79091_c1_g2										TRINITY_DN92785_c1_g1
	TRINITY_DN98783_c1_g1										TRINITY_DN96380_c1_g3
	TRINITY_DN84059_c1_g1										TRINITY_DN98912_c0_g2
	TRINITY_DN71211_c0_g1										TRINITY_DN67266_c0_g1
	TRINITY_DN99029_c9_g3										TRINITY_DN72909_c0_g5
	TRINITY_DN75311_c0_g1										TRINITY_DN87255_c2_g1
	TRINITY_DN97341_c0_g3										TRINITY_DN91317_c1_g5
	TRINITY_DN98654_c1_g1										TRINITY_DN98988_c7_g1
	TRINITY_DN80412_c1_g6										TRINITY_DN97667_c3_g2
	TRINITY_DN68646_c0_g1										TRINITY_DN97815_c1_g4
	TRINITY_DN88575_c0_g1										TRINITY_DN90064_c0_g4
	TRINITY_DN81262_c1_g1										TRINITY_DN74648_c0_g1
	TRINITY_DN83303_c2_g4										TRINITY_DN86011_c1_g1
	TRINITY_DN98542_c1_g1										TRINITY_DN95775_c0_g1
	TRINITY_DN78591_c0_g1										TRINITY_DN95116_c2_g1
	TRINITY_DN82882_c0_g1										TRINITY_DN90997_c1_g1
	TRINITY_DN90368_c2_g3										TRINITY_DN96824_c2_g2
	TRINITY_DN87863_c0_g1										TRINITY_DN98589_c2_g1
	TRINITY_DN98942_c3_g1										TRINITY_DN84083_c0_g2
	TRINITY_DN89761_c1_g1										TRINITY_DN96029_c2_g1
	TRINITY_DN98889_c5_g1										TRINITY_DN77538_c3_g4
	TRINITY_DN97840_c1_g5										TRINITY_DN98434_c2_g2
	TRINITY_DN70380_c1_g4										TRINITY_DN77440_c0_g3
	TRINITY_DN77611_c0_g1										TRINITY_DN97817_c3_g1
	TRINITY_DN79583_c1_g3										TRINITY_DN97471_c0_g2
	TRINITY_DN83645_c1_g3										TRINITY_DN71493_c1_g3
	TRINITY_DN96900_c0_g3										TRINITY_DN86037_c1_g3
	TRINITY_DN92141_c2_g2										TRINITY_DN79731_c0_g1
	TRINITY_DN89467_c0_g4										TRINITY_DN96368_c1_g3
	TRINITY_DN82064_c0_g2										TRINITY_DN89350_c0_g1
	TRINITY_DN97201_c2_g2										TRINITY_DN91724_c0_g1
	TRINITY_DN91267_c0_g1										TRINITY_DN95777_c4_g2
	TRINITY_DN79965_c0_g1										TRINITY_DN86517_c1_g1
	TRINITY_DN98417_c2_g2										TRINITY_DN83066_c1_g3
	TRINITY_DN88766_c0_g2										TRINITY_DN84236_c1_g3
	TRINITY_DN84064_c2_g2										TRINITY_DN78702_c1_g1
	TRINITY_DN72389_c3_g1										TRINITY_DN98469_c2_g1
	TRINITY_DN92650_c3_g1										TRINITY_DN91167_c0_g1
	TRINITY_DN78519_c1_g3										TRINITY_DN79434_c0_g1
	TRINITY_DN76173_c1_g1										TRINITY_DN94420_c0_g3
	TRINITY_DN80464_c0_g1										TRINITY_DN95552_c0_g2
	TRINITY_DN96198_c0_g2										TRINITY_DN81461_c0_g3
	TRINITY_DN98124_c1_g1										TRINITY_DN96733_c2_g2
	TRINITY_DN70689_c0_g4										TRINITY_DN99055_c10_g1
	TRINITY_DN94072_c1_g4										TRINITY_DN73194_c1_g1
	TRINITY_DN97443_c1_g1										TRINITY_DN93209_c1_g1
	TRINITY_DN85616_c0_g3										TRINITY_DN83616_c0_g4
	TRINITY_DN69196_c0_g1										TRINITY_DN98191_c1_g2
	TRINITY_DN88794_c2_g3										TRINITY_DN68749_c0_g1
	TRINITY_DN79376_c0_g3										TRINITY_DN91917_c1_g1
	TRINITY_DN78037_c0_g1										TRINITY_DN90782_c1_g1
	TRINITY_DN98625_c2_g3										TRINITY_DN88078_c1_g2
	TRINITY_DN77511_c2_g2										TRINITY_DN88221_c0_g2
	TRINITY_DN93109_c0_g3										TRINITY_DN91028_c0_g1
	TRINITY_DN76684_c0_g1										TRINITY_DN95461_c0_g1
	TRINITY_DN88478_c2_g1										TRINITY_DN77009_c0_g3
	TRINITY_DN96962_c1_g1										TRINITY_DN82458_c1_g1
	TRINITY_DN69788_c3_g3										TRINITY_DN93358_c0_g3
	TRINITY_DN80828_c0_g3										TRINITY_DN98317_c1_g1
	TRINITY_DN86857_c0_g1										TRINITY_DN80373_c0_g1
	TRINITY_DN92102_c1_g3										TRINITY_DN79231_c0_g1
	TRINITY_DN78992_c0_g1										TRINITY_DN97495_c2_g1
	TRINITY_DN82435_c2_g2										TRINITY_DN74712_c0_g1
	TRINITY_DN94047_c0_g1										TRINITY_DN91914_c1_g1
	TRINITY_DN71785_c0_g1										TRINITY_DN98888_c6_g1
	TRINITY_DN84349_c0_g1										TRINITY_DN93339_c1_g1
	TRINITY_DN98416_c3_g6										TRINITY_DN98061_c3_g6
	TRINITY_DN81344_c0_g1										TRINITY_DN91918_c0_g2
	TRINITY_DN97274_c2_g1										TRINITY_DN96396_c2_g2
	TRINITY_DN91421_c1_g2										TRINITY_DN89775_c2_g5
	TRINITY_DN90719_c2_g1										TRINITY_DN94265_c0_g3
	TRINITY_DN90252_c2_g1										TRINITY_DN92492_c0_g2
	TRINITY_DN98625_c1_g1										TRINITY_DN75619_c0_g1
	TRINITY_DN91729_c2_g1										TRINITY_DN84842_c1_g1
	TRINITY_DN97354_c1_g2										TRINITY_DN98620_c2_g1
	TRINITY_DN97321_c1_g1										TRINITY_DN87476_c0_g1
	TRINITY_DN90888_c3_g3										TRINITY_DN98285_c2_g1
	TRINITY_DN79682_c1_g2										TRINITY_DN78559_c1_g4
	TRINITY_DN91786_c2_g1										TRINITY_DN81857_c0_g3
	TRINITY_DN96989_c1_g1										TRINITY_DN94207_c2_g2
	TRINITY_DN81848_c2_g1										TRINITY_DN98929_c2_g2
	TRINITY_DN89879_c1_g2										TRINITY_DN76917_c3_g1
	TRINITY_DN83441_c1_g2										TRINITY_DN95948_c1_g4
	TRINITY_DN76862_c0_g3										TRINITY_DN89376_c0_g1
	TRINITY_DN84877_c1_g4										TRINITY_DN70026_c1_g2
	TRINITY_DN87268_c1_g7										TRINITY_DN94349_c0_g2
	TRINITY_DN94931_c0_g1										TRINITY_DN96139_c1_g1
	TRINITY_DN90962_c1_g1										TRINITY_DN69932_c0_g3
	TRINITY_DN86950_c1_g1										TRINITY_DN97602_c2_g5
	TRINITY_DN83484_c1_g2										TRINITY_DN75037_c1_g1
	TRINITY_DN90825_c0_g1										TRINITY_DN87261_c0_g2
	TRINITY_DN74676_c2_g3										TRINITY_DN80487_c0_g3
	TRINITY_DN97928_c2_g3										TRINITY_DN96520_c1_g1
	TRINITY_DN74807_c0_g1										TRINITY_DN98708_c2_g2
	TRINITY_DN76907_c0_g2										TRINITY_DN91966_c0_g1
	TRINITY_DN82731_c0_g1										TRINITY_DN72704_c2_g1
	TRINITY_DN83509_c0_g2										TRINITY_DN79002_c0_g3
	TRINITY_DN92704_c0_g1										TRINITY_DN94186_c1_g3
	TRINITY_DN77683_c1_g4										TRINITY_DN89685_c1_g2
	TRINITY_DN82527_c2_g2										TRINITY_DN92736_c1_g3
	TRINITY_DN98697_c3_g4										TRINITY_DN87856_c1_g1
	TRINITY_DN81865_c0_g1										TRINITY_DN84873_c1_g1
	TRINITY_DN77174_c0_g2										TRINITY_DN81852_c1_g1
	TRINITY_DN92051_c0_g2										TRINITY_DN85282_c1_g2
	TRINITY_DN96431_c2_g1										TRINITY_DN90280_c0_g1
	TRINITY_DN87040_c2_g1										TRINITY_DN97220_c3_g3
	TRINITY_DN87995_c1_g1										TRINITY_DN98362_c5_g2
	TRINITY_DN97141_c1_g1										TRINITY_DN97001_c2_g2
	TRINITY_DN85572_c0_g1										TRINITY_DN96581_c2_g1
	TRINITY_DN80890_c1_g1										TRINITY_DN93948_c1_g2
											TRINITY_DN90634_c0_g3
