# Supplementary material for: Comparative Transcriptomics Unveil the Crucial Genes Involved in Coumarin Biosynthesis in Peucedanum praeruptorum Dunn
Source: Front Plant Sci. 2022 May 17;13:899819. doi: 10.3389/fpls.2022.899819 (PMC9152428; doi:10.3389/fpls.2022.899819)
Supplement: Supplementary file 11 [file Table_7.XLSX]

## Sheet: Sheet1
fromNode	toNode	weight	direction	fromAltName	toAltName
TRINITY_DN86290_c1_g1	TRINITY_DN90493_c3_g1	0.0231502	undirected	NA	NA
TRINITY_DN72619_c2_g1	TRINITY_DN90493_c3_g1	0.0327115	undirected	NA	NA
TRINITY_DN92098_c0_g7	TRINITY_DN75931_c1_g5	0.0210214	undirected	NA	NA
TRINITY_DN77439_c1_g1	TRINITY_DN75931_c1_g5	0.0346987	undirected	NA	NA
TRINITY_DN97717_c2_g6	TRINITY_DN75931_c1_g5	0.0268972	undirected	NA	NA
TRINITY_DN84719_c0_g2	TRINITY_DN75931_c1_g5	0.0344454	undirected	NA	NA
TRINITY_DN81586_c3_g2	TRINITY_DN95494_c1_g1	0.0223514	undirected	NA	NA
TRINITY_DN76226_c0_g1	TRINITY_DN95494_c1_g1	0.0232207	undirected	NA	NA
TRINITY_DN96123_c1_g1	TRINITY_DN95494_c1_g1	0.0213344	undirected	NA	NA
TRINITY_DN73173_c1_g1	TRINITY_DN95494_c1_g1	0.0708275	undirected	NA	NA
TRINITY_DN84007_c2_g2	TRINITY_DN95494_c1_g1	0.0212645	undirected	NA	NA
TRINITY_DN80284_c2_g1	TRINITY_DN95494_c1_g1	0.0459429	undirected	NA	NA
TRINITY_DN88952_c1_g1	TRINITY_DN95494_c1_g1	0.0398921	undirected	NA	NA
TRINITY_DN90148_c2_g1	TRINITY_DN95494_c1_g1	0.0801563	undirected	NA	NA
TRINITY_DN79499_c1_g1	TRINITY_DN95494_c1_g1	0.026477	undirected	NA	NA
TRINITY_DN81058_c1_g3	TRINITY_DN95494_c1_g1	0.033954	undirected	NA	NA
TRINITY_DN78442_c0_g2	TRINITY_DN95494_c1_g1	0.0561304	undirected	NA	NA
TRINITY_DN77126_c1_g3	TRINITY_DN95494_c1_g1	0.0302852	undirected	NA	NA
TRINITY_DN97472_c3_g1	TRINITY_DN95494_c1_g1	0.0331832	undirected	NA	NA
TRINITY_DN97890_c1_g1	TRINITY_DN95494_c1_g1	0.0359436	undirected	NA	NA
TRINITY_DN96584_c3_g4	TRINITY_DN95494_c1_g1	0.024596	undirected	NA	NA
TRINITY_DN87544_c1_g3	TRINITY_DN95494_c1_g1	0.0502299	undirected	NA	NA
TRINITY_DN95632_c3_g2	TRINITY_DN95494_c1_g1	0.0249558	undirected	NA	NA
TRINITY_DN77049_c0_g3	TRINITY_DN95494_c1_g1	0.021684	undirected	NA	NA
TRINITY_DN87156_c2_g2	TRINITY_DN95494_c1_g1	0.055303	undirected	NA	NA
TRINITY_DN83179_c0_g2	TRINITY_DN95494_c1_g1	0.02849	undirected	NA	NA
TRINITY_DN90825_c1_g2	TRINITY_DN95494_c1_g1	0.0269076	undirected	NA	NA
TRINITY_DN85222_c1_g2	TRINITY_DN95494_c1_g1	0.0372731	undirected	NA	NA
TRINITY_DN92678_c1_g2	TRINITY_DN95494_c1_g1	0.0356063	undirected	NA	NA
TRINITY_DN94734_c0_g3	TRINITY_DN95494_c1_g1	0.0251505	undirected	NA	NA
TRINITY_DN80536_c0_g1	TRINITY_DN95494_c1_g1	0.0202723	undirected	NA	NA
TRINITY_DN70599_c1_g1	TRINITY_DN95494_c1_g1	0.0425007	undirected	NA	NA
TRINITY_DN98043_c2_g2	TRINITY_DN95494_c1_g1	0.0648427	undirected	NA	NA
TRINITY_DN97736_c4_g6	TRINITY_DN95494_c1_g1	0.0519515	undirected	NA	NA
TRINITY_DN87488_c0_g1	TRINITY_DN95494_c1_g1	0.030768	undirected	NA	NA
TRINITY_DN68475_c0_g3	TRINITY_DN95494_c1_g1	0.0450457	undirected	NA	NA
TRINITY_DN91736_c1_g1	TRINITY_DN95494_c1_g1	0.0207039	undirected	NA	NA
TRINITY_DN84336_c1_g2	TRINITY_DN95494_c1_g1	0.0546914	undirected	NA	NA
TRINITY_DN79885_c0_g2	TRINITY_DN95494_c1_g1	0.0639069	undirected	NA	NA
TRINITY_DN93003_c1_g1	TRINITY_DN95494_c1_g1	0.0433423	undirected	NA	NA
TRINITY_DN91089_c0_g2	TRINITY_DN95494_c1_g1	0.0332123	undirected	NA	NA
TRINITY_DN93967_c0_g1	TRINITY_DN68475_c0_g1	0.0235537	undirected	NA	NA
TRINITY_DN66768_c0_g1	TRINITY_DN68475_c0_g1	0.0268959	undirected	NA	NA
TRINITY_DN84843_c0_g3	TRINITY_DN68475_c0_g1	0.0228449	undirected	NA	NA
TRINITY_DN80284_c2_g1	TRINITY_DN68475_c0_g1	0.0207764	undirected	NA	NA
TRINITY_DN88952_c1_g1	TRINITY_DN68475_c0_g1	0.027946	undirected	NA	NA
TRINITY_DN78442_c0_g2	TRINITY_DN68475_c0_g1	0.173073	undirected	NA	NA
TRINITY_DN97472_c3_g1	TRINITY_DN68475_c0_g1	0.117166	undirected	NA	NA
TRINITY_DN86344_c0_g1	TRINITY_DN68475_c0_g1	0.0262998	undirected	NA	NA
TRINITY_DN87544_c1_g3	TRINITY_DN68475_c0_g1	0.0677428	undirected	NA	NA
TRINITY_DN98330_c1_g3	TRINITY_DN68475_c0_g1	0.0438649	undirected	NA	NA
TRINITY_DN93764_c0_g3	TRINITY_DN68475_c0_g1	0.0301705	undirected	NA	NA
TRINITY_DN76228_c1_g3	TRINITY_DN68475_c0_g1	0.0230211	undirected	NA	NA
TRINITY_DN96312_c1_g3	TRINITY_DN68475_c0_g1	0.035282	undirected	NA	NA
TRINITY_DN87156_c2_g2	TRINITY_DN68475_c0_g1	0.218818	undirected	NA	NA
TRINITY_DN81097_c3_g1	TRINITY_DN68475_c0_g1	0.0287501	undirected	NA	NA
TRINITY_DN85222_c1_g2	TRINITY_DN68475_c0_g1	0.0589835	undirected	NA	NA
TRINITY_DN92678_c1_g2	TRINITY_DN68475_c0_g1	0.0421312	undirected	NA	NA
TRINITY_DN96276_c1_g6	TRINITY_DN68475_c0_g1	0.0211423	undirected	NA	NA
TRINITY_DN97884_c2_g3	TRINITY_DN68475_c0_g1	0.0254701	undirected	NA	NA
TRINITY_DN94734_c0_g3	TRINITY_DN68475_c0_g1	0.0255452	undirected	NA	NA
TRINITY_DN96416_c1_g3	TRINITY_DN68475_c0_g1	0.0580516	undirected	NA	NA
TRINITY_DN70599_c1_g1	TRINITY_DN68475_c0_g1	0.0391883	undirected	NA	NA
TRINITY_DN98043_c2_g2	TRINITY_DN68475_c0_g1	0.174514	undirected	NA	NA
TRINITY_DN85421_c0_g2	TRINITY_DN68475_c0_g1	0.0317217	undirected	NA	NA
TRINITY_DN97736_c4_g6	TRINITY_DN68475_c0_g1	0.222294	undirected	NA	NA
TRINITY_DN73655_c0_g3	TRINITY_DN68475_c0_g1	0.0349133	undirected	NA	NA
TRINITY_DN98849_c3_g1	TRINITY_DN68475_c0_g1	0.0546919	undirected	NA	NA
TRINITY_DN84708_c1_g1	TRINITY_DN68475_c0_g1	0.0214679	undirected	NA	NA
TRINITY_DN81308_c1_g1	TRINITY_DN68475_c0_g1	0.0534949	undirected	NA	NA
TRINITY_DN74998_c1_g1	TRINITY_DN68475_c0_g1	0.0388883	undirected	NA	NA
TRINITY_DN68475_c0_g3	TRINITY_DN68475_c0_g1	0.0561695	undirected	NA	NA
TRINITY_DN92237_c0_g5	TRINITY_DN68475_c0_g1	0.0793724	undirected	NA	NA
TRINITY_DN70421_c0_g1	TRINITY_DN68475_c0_g1	0.0250304	undirected	NA	NA
TRINITY_DN88935_c0_g1	TRINITY_DN68475_c0_g1	0.0441046	undirected	NA	NA
TRINITY_DN91089_c0_g2	TRINITY_DN68475_c0_g1	0.0472318	undirected	NA	NA
TRINITY_DN71177_c1_g1	TRINITY_DN79594_c1_g2	0.0846554	undirected	NA	NA
TRINITY_DN90650_c1_g2	TRINITY_DN79594_c1_g2	0.0818371	undirected	NA	NA
TRINITY_DN80280_c2_g2	TRINITY_DN79594_c1_g2	0.0720042	undirected	NA	NA
TRINITY_DN87557_c0_g5	TRINITY_DN79594_c1_g2	0.0689982	undirected	NA	NA
TRINITY_DN88373_c0_g7	TRINITY_DN79594_c1_g2	0.0649825	undirected	NA	NA
TRINITY_DN82132_c0_g1	TRINITY_DN79594_c1_g2	0.0639077	undirected	NA	NA
TRINITY_DN74004_c1_g3	TRINITY_DN79594_c1_g2	0.0607119	undirected	NA	NA
TRINITY_DN77209_c2_g1	TRINITY_DN79594_c1_g2	0.0582788	undirected	NA	NA
TRINITY_DN82831_c0_g1	TRINITY_DN79594_c1_g2	0.0578282	undirected	NA	NA
TRINITY_DN94241_c0_g1	TRINITY_DN79594_c1_g2	0.0574311	undirected	NA	NA
TRINITY_DN85833_c1_g1	TRINITY_DN79594_c1_g2	0.0573718	undirected	NA	NA
TRINITY_DN81096_c1_g2	TRINITY_DN79594_c1_g2	0.0567031	undirected	NA	NA
TRINITY_DN75989_c1_g1	TRINITY_DN79594_c1_g2	0.0561768	undirected	NA	NA
TRINITY_DN90894_c0_g2	TRINITY_DN79594_c1_g2	0.0558554	undirected	NA	NA
TRINITY_DN97373_c0_g1	TRINITY_DN79594_c1_g2	0.0549129	undirected	NA	NA
TRINITY_DN98325_c1_g2	TRINITY_DN79594_c1_g2	0.054581	undirected	NA	NA
TRINITY_DN90972_c5_g1	TRINITY_DN79594_c1_g2	0.052932	undirected	NA	NA
TRINITY_DN97182_c2_g1	TRINITY_DN79594_c1_g2	0.0526675	undirected	NA	NA
TRINITY_DN82982_c0_g1	TRINITY_DN79594_c1_g2	0.0524625	undirected	NA	NA
TRINITY_DN97182_c2_g4	TRINITY_DN79594_c1_g2	0.0522366	undirected	NA	NA
TRINITY_DN87065_c1_g4	TRINITY_DN79594_c1_g2	0.0519659	undirected	NA	NA
TRINITY_DN90604_c0_g1	TRINITY_DN79594_c1_g2	0.0513408	undirected	NA	NA
TRINITY_DN76095_c0_g2	TRINITY_DN79594_c1_g2	0.0509582	undirected	NA	NA
TRINITY_DN98338_c2_g1	TRINITY_DN79594_c1_g2	0.0498692	undirected	NA	NA
TRINITY_DN78181_c1_g1	TRINITY_DN79594_c1_g2	0.0493463	undirected	NA	NA
TRINITY_DN98326_c3_g2	TRINITY_DN79594_c1_g2	0.0472201	undirected	NA	NA
TRINITY_DN92340_c1_g1	TRINITY_DN79594_c1_g2	0.0465545	undirected	NA	NA
TRINITY_DN88983_c0_g2	TRINITY_DN79594_c1_g2	0.046381	undirected	NA	NA
TRINITY_DN89581_c0_g1	TRINITY_DN79594_c1_g2	0.0463438	undirected	NA	NA
TRINITY_DN92715_c1_g1	TRINITY_DN79594_c1_g2	0.0463134	undirected	NA	NA
TRINITY_DN89334_c0_g1	TRINITY_DN79594_c1_g2	0.045918	undirected	NA	NA
TRINITY_DN87724_c1_g3	TRINITY_DN79594_c1_g2	0.0457891	undirected	NA	NA
TRINITY_DN81593_c2_g1	TRINITY_DN79594_c1_g2	0.0457551	undirected	NA	NA
TRINITY_DN96115_c0_g6	TRINITY_DN79594_c1_g2	0.0455842	undirected	NA	NA
TRINITY_DN94734_c0_g1	TRINITY_DN79594_c1_g2	0.0454989	undirected	NA	NA
TRINITY_DN86534_c1_g1	TRINITY_DN79594_c1_g2	0.0454178	undirected	NA	NA
TRINITY_DN89739_c1_g2	TRINITY_DN79594_c1_g2	0.0453065	undirected	NA	NA
TRINITY_DN94745_c1_g1	TRINITY_DN79594_c1_g2	0.0444174	undirected	NA	NA
TRINITY_DN71515_c1_g1	TRINITY_DN79594_c1_g2	0.0441913	undirected	NA	NA
TRINITY_DN73704_c0_g9	TRINITY_DN79594_c1_g2	0.0441196	undirected	NA	NA
TRINITY_DN74863_c1_g1	TRINITY_DN79594_c1_g2	0.0440144	undirected	NA	NA
TRINITY_DN87479_c2_g5	TRINITY_DN79594_c1_g2	0.0436369	undirected	NA	NA
TRINITY_DN86719_c0_g2	TRINITY_DN79594_c1_g2	0.043526	undirected	NA	NA
TRINITY_DN86958_c2_g2	TRINITY_DN79594_c1_g2	0.0434644	undirected	NA	NA
TRINITY_DN96248_c1_g4	TRINITY_DN79594_c1_g2	0.04346	undirected	NA	NA
TRINITY_DN86285_c4_g1	TRINITY_DN79594_c1_g2	0.0434358	undirected	NA	NA
TRINITY_DN97435_c2_g1	TRINITY_DN79594_c1_g2	0.043434	undirected	NA	NA
TRINITY_DN87488_c0_g1	TRINITY_DN79594_c1_g2	0.0433595	undirected	NA	NA
TRINITY_DN85740_c0_g1	TRINITY_DN79594_c1_g2	0.0432093	undirected	NA	NA
TRINITY_DN94048_c3_g1	TRINITY_DN79594_c1_g2	0.0431843	undirected	NA	NA
TRINITY_DN95201_c2_g4	TRINITY_DN77989_c3_g2	0.102353	undirected	NA	NA
TRINITY_DN72281_c0_g1	TRINITY_DN77989_c3_g2	0.0780344	undirected	NA	NA
TRINITY_DN71377_c0_g2	TRINITY_DN77989_c3_g2	0.0754157	undirected	NA	NA
TRINITY_DN97373_c0_g1	TRINITY_DN77989_c3_g2	0.0751743	undirected	NA	NA
TRINITY_DN98939_c1_g1	TRINITY_DN77989_c3_g2	0.073506	undirected	NA	NA
TRINITY_DN90825_c1_g2	TRINITY_DN77989_c3_g2	0.0732941	undirected	NA	NA
TRINITY_DN98325_c1_g2	TRINITY_DN77989_c3_g2	0.0710979	undirected	NA	NA
TRINITY_DN71177_c1_g1	TRINITY_DN77989_c3_g2	0.0684274	undirected	NA	NA
TRINITY_DN88437_c3_g1	TRINITY_DN77989_c3_g2	0.0662133	undirected	NA	NA
TRINITY_DN92993_c1_g1	TRINITY_DN77989_c3_g2	0.0652132	undirected	NA	NA
TRINITY_DN92725_c2_g3	TRINITY_DN77989_c3_g2	0.063886	undirected	NA	NA
TRINITY_DN87557_c0_g5	TRINITY_DN77989_c3_g2	0.0627834	undirected	NA	NA
TRINITY_DN92715_c1_g1	TRINITY_DN77989_c3_g2	0.0627047	undirected	NA	NA
TRINITY_DN80280_c2_g2	TRINITY_DN77989_c3_g2	0.0625272	undirected	NA	NA
TRINITY_DN82831_c0_g1	TRINITY_DN77989_c3_g2	0.0617235	undirected	NA	NA
TRINITY_DN90650_c1_g2	TRINITY_DN77989_c3_g2	0.0615068	undirected	NA	NA
TRINITY_DN92663_c1_g1	TRINITY_DN77989_c3_g2	0.0613658	undirected	NA	NA
TRINITY_DN96423_c3_g1	TRINITY_DN77989_c3_g2	0.0611054	undirected	NA	NA
TRINITY_DN97349_c1_g1	TRINITY_DN77989_c3_g2	0.0608844	undirected	NA	NA
TRINITY_DN82132_c0_g1	TRINITY_DN77989_c3_g2	0.0605114	undirected	NA	NA
TRINITY_DN73252_c0_g1	TRINITY_DN77989_c3_g2	0.0598635	undirected	NA	NA
TRINITY_DN77100_c0_g1	TRINITY_DN77989_c3_g2	0.059311	undirected	NA	NA
TRINITY_DN79669_c0_g4	TRINITY_DN77989_c3_g2	0.059189	undirected	NA	NA
TRINITY_DN77430_c4_g3	TRINITY_DN77989_c3_g2	0.0589656	undirected	NA	NA
TRINITY_DN90704_c0_g1	TRINITY_DN77989_c3_g2	0.0585172	undirected	NA	NA
TRINITY_DN94048_c3_g1	TRINITY_DN77989_c3_g2	0.0584099	undirected	NA	NA
TRINITY_DN96448_c1_g3	TRINITY_DN77989_c3_g2	0.0579499	undirected	NA	NA
TRINITY_DN85740_c0_g1	TRINITY_DN77989_c3_g2	0.0569772	undirected	NA	NA
TRINITY_DN89768_c0_g2	TRINITY_DN77989_c3_g2	0.0563607	undirected	NA	NA
TRINITY_DN98338_c2_g1	TRINITY_DN77989_c3_g2	0.0563196	undirected	NA	NA
TRINITY_DN90791_c0_g2	TRINITY_DN77989_c3_g2	0.0563028	undirected	NA	NA
TRINITY_DN76329_c1_g1	TRINITY_DN77989_c3_g2	0.0544779	undirected	NA	NA
TRINITY_DN85346_c1_g1	TRINITY_DN77989_c3_g2	0.0543516	undirected	NA	NA
TRINITY_DN98242_c3_g1	TRINITY_DN77989_c3_g2	0.0539604	undirected	NA	NA
TRINITY_DN86719_c0_g2	TRINITY_DN77989_c3_g2	0.0536812	undirected	NA	NA
TRINITY_DN79508_c0_g1	TRINITY_DN77989_c3_g2	0.0534289	undirected	NA	NA
TRINITY_DN96248_c1_g4	TRINITY_DN77989_c3_g2	0.052204	undirected	NA	NA
TRINITY_DN98841_c3_g1	TRINITY_DN77989_c3_g2	0.0518388	undirected	NA	NA
TRINITY_DN82733_c3_g4	TRINITY_DN77989_c3_g2	0.0515448	undirected	NA	NA
TRINITY_DN90894_c0_g2	TRINITY_DN77989_c3_g2	0.051451	undirected	NA	NA
TRINITY_DN74833_c0_g1	TRINITY_DN77989_c3_g2	0.0514127	undirected	NA	NA
TRINITY_DN90972_c5_g2	TRINITY_DN77989_c3_g2	0.0513231	undirected	NA	NA
TRINITY_DN87473_c0_g3	TRINITY_DN77989_c3_g2	0.0511886	undirected	NA	NA
TRINITY_DN90765_c1_g6	TRINITY_DN77989_c3_g2	0.051081	undirected	NA	NA
TRINITY_DN83985_c0_g2	TRINITY_DN77989_c3_g2	0.0509856	undirected	NA	NA
TRINITY_DN74004_c1_g3	TRINITY_DN77989_c3_g2	0.0508753	undirected	NA	NA
TRINITY_DN96861_c0_g4	TRINITY_DN77989_c3_g2	0.0497818	undirected	NA	NA
TRINITY_DN96138_c1_g1	TRINITY_DN77989_c3_g2	0.0495931	undirected	NA	NA
TRINITY_DN96763_c2_g3	TRINITY_DN77989_c3_g2	0.0495808	undirected	NA	NA
TRINITY_DN86954_c1_g1	TRINITY_DN77989_c3_g2	0.0494015	undirected	NA	NA
TRINITY_DN76095_c0_g2	TRINITY_DN74096_c0_g1	0.159015	undirected	NA	NA
TRINITY_DN89334_c0_g1	TRINITY_DN74096_c0_g1	0.146279	undirected	NA	NA
TRINITY_DN77576_c1_g1	TRINITY_DN74096_c0_g1	0.131999	undirected	NA	NA
TRINITY_DN95583_c1_g4	TRINITY_DN74096_c0_g1	0.128355	undirected	NA	NA
TRINITY_DN98338_c2_g1	TRINITY_DN74096_c0_g1	0.126236	undirected	NA	NA
TRINITY_DN79029_c0_g2	TRINITY_DN74096_c0_g1	0.123211	undirected	NA	NA
TRINITY_DN71177_c1_g1	TRINITY_DN74096_c1_g1	0.115814	undirected	NA	NA
TRINITY_DN77209_c2_g1	TRINITY_DN74096_c0_g1	0.114005	undirected	NA	NA
TRINITY_DN96115_c0_g6	TRINITY_DN74096_c0_g1	0.11272	undirected	NA	NA
TRINITY_DN80280_c2_g2	TRINITY_DN74096_c0_g1	0.111485	undirected	NA	NA
TRINITY_DN90972_c5_g2	TRINITY_DN74096_c1_g1	0.108527	undirected	NA	NA
TRINITY_DN82132_c0_g1	TRINITY_DN74096_c0_g1	0.107396	undirected	NA	NA
TRINITY_DN87557_c0_g1	TRINITY_DN74096_c0_g1	0.10595	undirected	NA	NA
TRINITY_DN87557_c0_g5	TRINITY_DN74096_c0_g1	0.105943	undirected	NA	NA
TRINITY_DN89446_c0_g2	TRINITY_DN74096_c0_g1	0.105439	undirected	NA	NA
TRINITY_DN75989_c1_g1	TRINITY_DN74096_c0_g1	0.103542	undirected	NA	NA
TRINITY_DN96248_c1_g4	TRINITY_DN74096_c0_g1	0.102902	undirected	NA	NA
TRINITY_DN90650_c1_g2	TRINITY_DN74096_c0_g1	0.101967	undirected	NA	NA
TRINITY_DN88394_c2_g2	TRINITY_DN74096_c0_g1	0.10025	undirected	NA	NA
TRINITY_DN89869_c0_g4	TRINITY_DN74096_c0_g1	0.0971476	undirected	NA	NA
TRINITY_DN87479_c2_g5	TRINITY_DN74096_c0_g1	0.0970909	undirected	NA	NA
TRINITY_DN96763_c2_g1	TRINITY_DN74096_c0_g1	0.0952911	undirected	NA	NA
TRINITY_DN88305_c0_g1	TRINITY_DN74096_c0_g1	0.0934377	undirected	NA	NA
TRINITY_DN74863_c1_g1	TRINITY_DN74096_c0_g1	0.0929088	undirected	NA	NA
TRINITY_DN89334_c0_g5	TRINITY_DN74096_c0_g1	0.0918912	undirected	NA	NA
TRINITY_DN95981_c1_g1	TRINITY_DN74096_c0_g1	0.0918657	undirected	NA	NA
TRINITY_DN75569_c1_g1	TRINITY_DN74096_c0_g1	0.0916036	undirected	NA	NA
TRINITY_DN96792_c1_g1	TRINITY_DN74096_c0_g1	0.0914537	undirected	NA	NA
TRINITY_DN95513_c0_g1	TRINITY_DN74096_c0_g1	0.0914203	undirected	NA	NA
TRINITY_DN69466_c1_g6	TRINITY_DN74096_c0_g1	0.0914163	undirected	NA	NA
TRINITY_DN82733_c3_g4	TRINITY_DN74096_c0_g1	0.0912887	undirected	NA	NA
TRINITY_DN85740_c0_g1	TRINITY_DN74096_c0_g1	0.0912539	undirected	NA	NA
TRINITY_DN98829_c0_g2	TRINITY_DN74096_c0_g1	0.0909203	undirected	NA	NA
TRINITY_DN78792_c1_g5	TRINITY_DN74096_c0_g1	0.0909168	undirected	NA	NA
